# Supplementary material for: Evolution, structure and function of the biosynthetic gene cluster of myriocin, a potent inhibitory sphingolipid
Source: Research Square preprint supplement (doi:10.21203/rs.3.rs-6881806/v1), 2025-10-31
Supplement: Supplementary file 1 [file 0afd160887d92792072fbcf7.xlsx]

## Sheet: CLOCI Fungi mtdb
code	genus	species	strain	taxonomy	version	source	biosample	source code	retrieved date	published
aaoarx1	Aaosphaeria	arxii	CBS17579	{"clade": "dothideomyceta", "kingdom": "Fungi", "phylum": "Ascomycota", "subphylum": "Pezizomycotina", "class": "Dothideomycetes", "subclass": "Pleosporomycetidae", "order": "Pleosporales", "family": "", "subfamily": ""}	v1.0	jgi		Aaoar1	20210414	Haridas S et al.,2020
abobie2	Abortiporus	biennis	CIRMBRFM1778	{"clade": "Opisthokonta", "kingdom": "Fungi", "phylum": "Basidiomycota", "subphylum": "Agaricomycotina", "class": "Agaricomycetes", "order": "Polyporales", "family": "Podoscyphaceae", "subfamily": ""}	v1.0	jgi		Abobie1	20210414	Hage H et al.,2021
absrep1	Absidia	repens	NRRL1336	{"clade": "Opisthokonta", "kingdom": "Fungi", "phylum": "Mucoromycota", "subphylum": "Mucoromycotina", "class": "Mucoromycetes", "order": "Mucorales", "family": "Cunninghamellaceae", "subfamily": ""}	v1.0	jgi		Absrep1	20210414	Mondo SJ et al.,2017
acaing1	Acaromyces	ingoldii	MCA4198	{"clade": "Opisthokonta", "kingdom": "Fungi", "phylum": "Basidiomycota", "subphylum": "Ustilaginomycotina", "class": "Exobasidiomycetes", "order": "Exobasidiales", "family": "Cryptobasidiaceae", "subfamily": ""}	v1.0	jgi		Acain1	20210414	Kijpornyongpan T et al.,2018
acastr1	Acarospora	strigata	CBS132363	{"clade": "leotiomyceta", "kingdom": "Fungi", "phylum": "Ascomycota", "subphylum": "Pezizomycotina", "class": "Lecanoromycetes", "subclass": "Acarosporomycetidae", "order": "Acarosporales", "family": "Acarosporaceae", "subfamily": ""}	0	jgi		Acastr1	20210414	McDonald TR et al.,2013
acemac1	Acephala	macrosclerotiorum	EW76UTF0540	{"clade": "sordariomyceta", "kingdom": "Fungi", "phylum": "Ascomycota", "subphylum": "Pezizomycotina", "class": "Leotiomycetes", "order": "Helotiales", "family": "Mollisiaceae", "subfamily": ""}	v1.0	jgi		Acema1	20210414	Miyauchi S et al.,2020
aciric1	Acidomyces	richmondensis	BFW	{"clade": "dothideomyceta", "kingdom": "Fungi", "phylum": "Ascomycota", "subphylum": "Pezizomycotina", "class": "Dothideomycetes", "subclass": "Dothideomycetidae", "order": "Mycosphaerellales", "family": "Teratosphaeriaceae", "subfamily": ""}	0	jgi	706361	Aciri1_meta	20210414	Mosier AC et al.,2016
aciric2	Acidomyces	richmondensis	BFW	{"clade": "dothideomyceta", "kingdom": "Fungi", "phylum": "Ascomycota", "subphylum": "Pezizomycotina", "class": "Dothideomycetes", "subclass": "Dothideomycetidae", "order": "Mycosphaerellales", "family": "Teratosphaeriaceae", "subfamily": ""}	0	jgi	706361	Aciri1_iso	20210414	Mosier AC et al.,2016
acisp.1	Acidomyces	sp.	richmondensis	{"clade": "dothideomyceta", "kingdom": "Fungi", "phylum": "Ascomycota", "subphylum": "Pezizomycotina", "class": "Dothideomycetes", "subclass": "Dothideomycetidae", "order": "Mycosphaerellales", "family": "Teratosphaeriaceae", "subfamily": ""}	20160315	ncbi	SAMN02799239	GCA_001572075.1	20210414	2016/02/24
acrchr1	Acremonium	chrysogenum	ATCC11550	{"clade": "sordariomyceta", "kingdom": "Fungi", "phylum": "Ascomycota", "subphylum": "Pezizomycotina", "class": "Sordariomycetes", "subclass": "Hypocreomycetidae", "order": "Hypocreales", "family": "", "subfamily": ""}	0	jgi	218291	Acrchr1	20210414	Terfehr D et al.,2014
actamb1	Actinomortierella	ambigua		{"clade": "Opisthokonta", "kingdom": "Fungi", "phylum": "Mucoromycota", "subphylum": "Mortierellomycotina", "class": "Mortierellomycetes", "order": "Mortierellales", "family": "Mortierellaceae", "subfamily": ""}	20210104	ncbi	SAMN09074672	GCA_016098155.1	20210414	2020/12/16
actamb2.1	Actinomortierella	ambigua		{"clade": "Opisthokonta", "kingdom": "Fungi", "phylum": "Mucoromycota", "subphylum": "Mortierellomycotina", "class": "Mortierellomycetes", "order": "Mortierellales", "family": "Mortierellaceae", "subfamily": ""}	20210104	ncbi	SAMN09074671	GCA_015502565.1	None	2020/11/16
actamb3.1	Actinomortierella	ambigua		{"clade": "Opisthokonta", "kingdom": "Fungi", "phylum": "Mucoromycota", "subphylum": "Mortierellomycotina", "class": "Mortierellomycetes", "order": "Mortierellales", "family": "Mortierellaceae", "subfamily": ""}	20210104	ncbi	SAMN05720519	GCA_015849275.1	None	2020/12/08
actwol1.1	Actinomortierella	wolfii		{"clade": "Opisthokonta", "kingdom": "Fungi", "phylum": "Mucoromycota", "subphylum": "Mortierellomycotina", "class": "Mortierellomycetes", "order": "Mortierellales", "family": "Mortierellaceae", "subfamily": ""}	20210104	ncbi	SAMN05720777	GCA_016098105.1	None	2020/12/16
actwol2.1	Actinomortierella	wolfii		{"clade": "Opisthokonta", "kingdom": "Fungi", "phylum": "Mucoromycota", "subphylum": "Mortierellomycotina", "class": "Mortierellomycetes", "order": "Mortierellales", "family": "Mortierellaceae", "subfamily": ""}	20210104	ncbi	SAMN05720778	GCA_016098135.1	None	2020/12/16
agabis1	Agaricus	bisporus	varburnettii	{"clade": "Opisthokonta", "kingdom": "Fungi", "phylum": "Basidiomycota", "subphylum": "Agaricomycotina", "class": "Agaricomycetes", "subclass": "Agaricomycetidae", "order": "Agaricales", "family": "Agaricaceae", "subfamily": ""}	20201021	ncbi	SAMN15043479	GCA_014872705.1	20210414	2020/10/02
agabis2.1	Agaricus	bisporus	varburnettiiJB137S8	{"clade": "Opisthokonta", "kingdom": "Fungi", "phylum": "Basidiomycota", "subphylum": "Agaricomycotina", "class": "Agaricomycetes", "subclass": "Agaricomycetidae", "order": "Agaricales", "family": "Agaricaceae", "subfamily": ""}	20140804	ncbi	SAMN00188834	GCF_000300555.1	None	2012/10/01
agabis4	Agaricus	bisporus	varbisporusH97	{"clade": "Opisthokonta", "kingdom": "Fungi", "phylum": "Basidiomycota", "subphylum": "Agaricomycotina", "class": "Agaricomycetes", "subclass": "Agaricomycetidae", "order": "Agaricales", "family": "Agaricaceae", "subfamily": ""}	v2.0	jgi	SAMN02744070	Agabi_varbisH97_2	None	Morin E et al.,2012
agraeg1	Agrocybe	aegerita		{"clade": "Opisthokonta", "kingdom": "Fungi", "phylum": "Basidiomycota", "subphylum": "Agaricomycotina", "class": "Agaricomycetes", "subclass": "Agaricomycetidae", "order": "Agaricales", "family": "Bolbitiaceae", "subfamily": ""}	20200118	ncbi	SAMEA104449891	GCA_902728275.1	20210414	2020/01/18
agrped1	Agrocybe	pediades	AH40210	{"clade": "Opisthokonta", "kingdom": "Fungi", "phylum": "Basidiomycota", "subphylum": "Agaricomycotina", "class": "Agaricomycetes", "subclass": "Agaricomycetidae", "order": "Agaricales", "family": "Bolbitiaceae", "subfamily": ""}	v1.0	jgi		Agrped1	20210414	Ruiz-Dueñas FJ et al.,2021
akalec1	Akanthomyces	lecanii	RCEF1005	{"clade": "sordariomyceta", "kingdom": "Fungi", "phylum": "Ascomycota", "subphylum": "Pezizomycotina", "class": "Sordariomycetes", "subclass": "Hypocreomycetidae", "order": "Hypocreales", "family": "Cordycipitaceae", "subfamily": ""}	20160504	ncbi	SAMN04908331	GCA_001636795.1	20210414	2016/05/04
akalec2	Akanthomyces	lecanii		{"clade": "sordariomyceta", "kingdom": "Fungi", "phylum": "Ascomycota", "subphylum": "Pezizomycotina", "class": "Sordariomycetes", "subclass": "Hypocreomycetidae", "order": "Hypocreales", "family": "Cordycipitaceae", "subfamily": ""}	20160527	ncbi	SAMN04516662	GCA_001653215.1	20210414	2016/05/27
alefal1.1	Alectoria	fallacina		{"clade": "OSLEUM clade", "kingdom": "Fungi", "phylum": "Ascomycota", "subphylum": "Pezizomycotina", "class": "Lecanoromycetes", "subclass": "Lecanoromycetidae", "order": "Lecanorales", "suborder": "Lecanorineae", "family": "Parmeliaceae", "subfamily": ""}	2021-03-19	ncbi	alefal1	GCA_905337325.1	None	2021/03/19
altalt4	Alternaria	alternata	MPIPUGEAT0064	{"clade": "dothideomyceta", "kingdom": "Fungi", "phylum": "Ascomycota", "subphylum": "Pezizomycotina", "class": "Dothideomycetes", "subclass": "Pleosporomycetidae", "order": "Pleosporales", "suborder": "Pleosporineae", "family": "Pleosporaceae", "subfamily": ""}	v1.0	jgi		Altalt1	20210414	Mesny F et al.,2021
altalt5	Alternaria	alternata	SRC1lrK2f	{"clade": "dothideomyceta", "kingdom": "Fungi", "phylum": "Ascomycota", "subphylum": "Pezizomycotina", "class": "Dothideomycetes", "subclass": "Pleosporomycetidae", "order": "Pleosporales", "suborder": "Pleosporineae", "family": "Pleosporaceae", "subfamily": ""}	v1.0	jgi	739251	Altal1	20210414	Zeiner CA et al.,2016
altatr1	Alternaria	atra		{"clade": "dothideomyceta", "kingdom": "Fungi", "phylum": "Ascomycota", "subphylum": "Pezizomycotina", "class": "Dothideomycetes", "subclass": "Pleosporomycetidae", "order": "Pleosporales", "suborder": "Pleosporineae", "family": "Pleosporaceae", "subfamily": ""}	2021-05-11	ncbi	altatr1	GCF_907166805.1	20210709	2021/05/11
altbur1	Alternaria	burnsii		{"clade": "dothideomyceta", "kingdom": "Fungi", "phylum": "Ascomycota", "subphylum": "Pezizomycotina", "class": "Dothideomycetes", "subclass": "Pleosporomycetidae", "order": "Pleosporales", "suborder": "Pleosporineae", "family": "Pleosporaceae", "subfamily": ""}	20200930	ncbi	SAMN13783390	GCF_013036055.1	20210414	2020/05/11
altpan1.1	Alternaria	panax		{"clade": "dothideomyceta", "kingdom": "Fungi", "phylum": "Ascomycota", "subphylum": "Pezizomycotina", "class": "Dothideomycetes", "subclass": "Pleosporomycetidae", "order": "Pleosporales", "suborder": "Pleosporineae", "family": "Pleosporaceae", "subfamily": ""}	2021-10-19	ncbi	altpan1	GCA_019702505.1	None	2021/08/20
altros1	Alternaria	rosae	MPIPUGEAT0040	{"clade": "dothideomyceta", "kingdom": "Fungi", "phylum": "Ascomycota", "subphylum": "Pezizomycotina", "class": "Dothideomycetes", "subclass": "Pleosporomycetidae", "order": "Pleosporales", "suborder": "Pleosporineae", "family": "Pleosporaceae", "subfamily": ""}	v1.0	jgi		Altro1	20210414	Mesny F et al.,2021
altsp.4	Alternaria	sp.	MG1	{"clade": "dothideomyceta", "kingdom": "Fungi", "phylum": "Ascomycota", "subphylum": "Pezizomycotina", "class": "Dothideomycetes", "subclass": "Pleosporomycetidae", "order": "Pleosporales", "suborder": "Pleosporineae", "family": "Pleosporaceae", "subfamily": ""}	2018-09-18 00:00:00	ncbi	altsp.4	GCA_003574525.1	20210421	2018/09/18
amabru1	Amanita	brunnescens	KoideBX004	{"clade": "Opisthokonta", "kingdom": "Fungi", "phylum": "Basidiomycota", "subphylum": "Agaricomycotina", "class": "Agaricomycetes", "subclass": "Agaricomycetidae", "order": "Agaricales", "family": "Amanitaceae", "subfamily": ""}	0	ncbi	Amabr1	GCA_001691785.3	20210421	1
amaino1	Amanita	inopinata	Kibby2008	{"clade": "Opisthokonta", "kingdom": "Fungi", "phylum": "Basidiomycota", "subphylum": "Agaricomycotina", "class": "Agaricomycetes", "subclass": "Agaricomycetidae", "order": "Agaricales", "family": "Amanitaceae", "subfamily": ""}	0	ncbi	Amain1	GCA_001691775.3	20210421	1
amajac1	Amanita	jacksonii	TRTC168611	{"clade": "Opisthokonta", "kingdom": "Fungi", "phylum": "Basidiomycota", "subphylum": "Agaricomycotina", "class": "Agaricomycetes", "subclass": "Agaricomycetidae", "order": "Agaricales", "family": "Amanitaceae", "subfamily": ""}	0	ncbi	Amaja1	GCA_000497225.1	20210421	1
amamus4	Amanita	muscaria	KoideBX008	{"clade": "Opisthokonta", "kingdom": "Fungi", "phylum": "Basidiomycota", "subphylum": "Agaricomycotina", "class": "Agaricomycetes", "subclass": "Agaricomycetidae", "order": "Agaricales", "family": "Amanitaceae", "subfamily": ""}	0	ncbi	Amamu2	GCA_000827485.1	20210421	1
amapha1	Amanita	phalloides	Alameda01	{"clade": "Opisthokonta", "kingdom": "Fungi", "phylum": "Basidiomycota", "subphylum": "Agaricomycotina", "class": "Agaricomycetes", "subclass": "Agaricomycetidae", "order": "Agaricales", "family": "Amanitaceae", "subfamily": ""}	0	ncbi	Amaph1	GCA_001983385.1	20210421	1
amapol1	Amanita	polypyramis	BWCC	{"clade": "Opisthokonta", "kingdom": "Fungi", "phylum": "Basidiomycota", "subphylum": "Agaricomycotina", "class": "Agaricomycetes", "subclass": "Agaricomycetidae", "order": "Agaricales", "family": "Amanitaceae", "subfamily": ""}	0	ncbi	Amapo1	GCA_001691755.2	20210421	1
amapse1	Amanita	pseudoporphyria	MG37	{"clade": "Opisthokonta", "kingdom": "Fungi", "phylum": "Basidiomycota", "subphylum": "Agaricomycotina", "class": "Agaricomycetes", "subclass": "Agaricomycetidae", "order": "Agaricales", "family": "Amanitaceae", "subfamily": ""}	0	ncbi	Amaps1	GCA_003316615.1	20210421	1
amarub1	Amanita	rubescens	Pilba	{"clade": "Opisthokonta", "kingdom": "Fungi", "phylum": "Basidiomycota", "subphylum": "Agaricomycotina", "class": "Agaricomycetes", "subclass": "Agaricomycetidae", "order": "Agaricales", "family": "Amanitaceae", "subfamily": ""}	v1.0	jgi	Amarub1	GCA_015039365.1	20210414	Miyauchi S et al.,2020
amathi1	Amanita	thiersii	SKay4041	{"clade": "Opisthokonta", "kingdom": "Fungi", "phylum": "Basidiomycota", "subphylum": "Agaricomycotina", "class": "Agaricomycetes", "subclass": "Agaricomycetidae", "order": "Agaricales", "family": "Amanitaceae", "subfamily": ""}	0	ncbi	Amath1	GCA_002554575.1	20210421	Hess J et al.,2014~Chaib De Mares M et al.,2015
ambphi1	Ambrosiozyma	philentoma	NRRLY7523	{"clade": "saccharomyceta", "kingdom": "Fungi", "phylum": "Ascomycota", "subphylum": "Saccharomycotina", "class": "Saccharomycetes", "order": "Saccharomycetales", "family": "", "subfamily": ""}	0	jgi	1761331	Ambph1	20210414	Krassowski T et al.,2018
amnlig1	Amniculicola	lignicola	CBS123094	{"clade": "dothideomyceta", "kingdom": "Fungi", "phylum": "Ascomycota", "subphylum": "Pezizomycotina", "class": "Dothideomycetes", "subclass": "Pleosporomycetidae", "order": "Pleosporales", "family": "Amniculicolaceae", "subfamily": ""}	v1.0	jgi	5732961	Amnli1	20210414	Haridas S et al.,2020
amores1	Amorphotheca	resinae	ATCC22711	{"clade": "sordariomyceta", "kingdom": "Fungi", "phylum": "Ascomycota", "subphylum": "Pezizomycotina", "class": "Leotiomycetes", "family": "Myxotrichaceae", "order": "", "subfamily": ""}	2018-03-28 00:00:00	ncbi	amores1	GCF_003019875.1	20210421	2018/03/27
ampqui1	Ampelomyces	quisqualis	HMLAC05119	{"clade": "dothideomyceta", "kingdom": "Fungi", "phylum": "Ascomycota", "subphylum": "Pezizomycotina", "class": "Dothideomycetes", "subclass": "Pleosporomycetidae", "order": "Pleosporales", "suborder": "Pleosporineae", "family": "Leptosphaeriaceae", "subfamily": ""}	v1.0	jgi		Ampqui1	20210414	Haridas S et al.,2020
ampsp.1	Amphiamblys	sp.	WSBS2006	{"clade": "Opisthokonta", "kingdom": "Fungi", "phylum": "Microsporidia", "family": "Amphiacanthidae", "subphylum": "", "class": "", "order": "", "subfamily": ""}	0	jgi		AmpWSBS2006_1	20210414	Mikhailov KV et al.,2017
ampsp.2.2	Amphinema	sp.	HHB7628Sp	{"clade": "Opisthokonta", "kingdom": "Fungi", "phylum": "Basidiomycota", "subphylum": "Agaricomycotina", "class": "Agaricomycetes", "subclass": "Agaricomycetidae", "order": "Atheliales", "family": "Atheliaceae", "subfamily": ""}	3	new		ampscu1	None	True
ampsp.3.1	Amphinema	sp.	HHB15864Sp	{"clade": "Opisthokonta", "kingdom": "Fungi", "phylum": "Basidiomycota", "subphylum": "Agaricomycotina", "class": "Agaricomycetes", "subclass": "Agaricomycetidae", "order": "Atheliales", "family": "Atheliaceae", "subfamily": ""}	2	new		ampsp.1	None	True
amycha1	Amylostereum	chailletii	DWAch2	{"clade": "Opisthokonta", "kingdom": "Fungi", "phylum": "Basidiomycota", "subphylum": "Agaricomycotina", "class": "Agaricomycetes", "order": "Russulales", "family": "Stereaceae", "subfamily": ""}	v1.0	jgi		Amycha1	20210414	Looney B et al.,2022
amyenc1	Amylocarpus	encephaloides	TRa018bII	{"clade": "sordariomyceta", "kingdom": "Fungi", "phylum": "Ascomycota", "subphylum": "Pezizomycotina", "class": "Leotiomycetes", "order": "Helotiales", "family": "", "subfamily": ""}	v1.0	jgi		Amyenc1	20210414	Hagestad OC et al.,2021
amylap1	Amylocystis	lapponica	SKaAmylap13	{"clade": "Opisthokonta", "kingdom": "Fungi", "phylum": "Basidiomycota", "subphylum": "Agaricomycotina", "class": "Agaricomycetes", "order": "Polyporales", "family": "Dacryobolaceae", "subfamily": ""}	v1.0	jgi		Amylap1_1	20210414	Hage H et al.,2021
anarob1	Anaeromyces	robustus		{"clade": "Opisthokonta", "kingdom": "Fungi", "phylum": "Chytridiomycota", "class": "Neocallimastigomycetes", "order": "Neocallimastigales", "family": "Neocallimastigaceae", "subphylum": "", "subfamily": ""}	v1.0	jgi		Anasp1	20210414	Haitjema CH et al.,2017~Mondo SJ et al.,2017
annbov1	Annulohypoxylon	bovei	varmicrosporaCBS124037	{"clade": "sordariomyceta", "kingdom": "Fungi", "phylum": "Ascomycota", "subphylum": "Pezizomycotina", "class": "Sordariomycetes", "subclass": "Xylariomycetidae", "order": "Xylariales", "family": "Hypoxylaceae", "subfamily": ""}	v1.0	jgi		Annbov1	20210414	Franco MEE et al.,2022
annmae1	Annulohypoxylon	maeteangense	CBS123835	{"clade": "sordariomyceta", "kingdom": "Fungi", "phylum": "Ascomycota", "subphylum": "Pezizomycotina", "class": "Sordariomycetes", "subclass": "Xylariomycetidae", "order": "Xylariales", "family": "Hypoxylaceae", "subfamily": ""}	v1.0	jgi		Annmae1	20210414	Franco MEE et al.,2022
annmin1	Annulohypoxylon	minutellum	CBS135445	{"clade": "sordariomyceta", "kingdom": "Fungi", "phylum": "Ascomycota", "subphylum": "Pezizomycotina", "class": "Sordariomycetes", "subclass": "Xylariomycetidae", "order": "Xylariales", "family": "Hypoxylaceae", "subfamily": ""}	v1.0	jgi		Annmin1	20210414	Franco MEE et al.,2022
annmor1	Annulohypoxylon	moriforme	CBS123579	{"clade": "sordariomyceta", "kingdom": "Fungi", "phylum": "Ascomycota", "subphylum": "Pezizomycotina", "class": "Sordariomycetes", "subclass": "Xylariomycetidae", "order": "Xylariales", "family": "Hypoxylaceae", "subfamily": ""}	v1.0	jgi		Annmor1	20210414	Franco MEE et al.,2022
annnit1	Annulohypoxylon	nitens	CBS120705	{"clade": "sordariomyceta", "kingdom": "Fungi", "phylum": "Ascomycota", "subphylum": "Pezizomycotina", "class": "Sordariomycetes", "subclass": "Xylariomycetidae", "order": "Xylariales", "family": "Hypoxylaceae", "subfamily": ""}	v1.0	jgi		Annnit1	20210414	Franco MEE et al.,2022
annsty1	Annulohypoxylon	stygium	FL0470	{"clade": "sordariomyceta", "kingdom": "Fungi", "phylum": "Ascomycota", "subphylum": "Pezizomycotina", "class": "Sordariomycetes", "subclass": "Xylariomycetidae", "order": "Xylariales", "family": "Hypoxylaceae", "subfamily": ""}	v1.0	jgi		Annsty1	20210414	Franco MEE et al.,2022
anntru1	Annulohypoxylon	truncatum	CBS140777	{"clade": "sordariomyceta", "kingdom": "Fungi", "phylum": "Ascomycota", "subphylum": "Pezizomycotina", "class": "Sordariomycetes", "subclass": "Xylariomycetidae", "order": "Xylariales", "family": "Hypoxylaceae", "subfamily": ""}	v1.0	jgi		Anntru1	20210414	Franco MEE et al.,2022
antflo1	Anthracocystis	flocculosa	PF1	{"clade": "Opisthokonta", "kingdom": "Fungi", "phylum": "Basidiomycota", "subphylum": "Ustilaginomycotina", "class": "Ustilaginomycetes", "order": "Ustilaginales", "family": "Ustilaginaceae", "subfamily": ""}	20140811	ncbi	SAMN02981510	GCF_000417875.1	20210414	2013/06/27
antflo2.1	Anthracocystis	flocculosa		{"clade": "Opisthokonta", "kingdom": "Fungi", "phylum": "Basidiomycota", "subphylum": "Ustilaginomycotina", "class": "Ustilaginomycetes", "order": "Ustilaginales", "family": "Ustilaginaceae", "subfamily": ""}	20190823	ncbi	SAMEA104710652	GCA_900322975.1	None	2019/08/23
antser1	Antrodia	serialis	Sig1Antser10	{"clade": "Opisthokonta", "kingdom": "Fungi", "phylum": "Basidiomycota", "subphylum": "Agaricomycotina", "class": "Agaricomycetes", "order": "Polyporales", "family": "Fomitopsidaceae", "subfamily": ""}	v1.0	jgi		Antser1	20210414	Hage H et al.,2021
apipor1.1	Apiotrichum	porosum		{"clade": "Opisthokonta", "kingdom": "Fungi", "phylum": "Basidiomycota", "subphylum": "Agaricomycotina", "class": "Tremellomycetes", "order": "Trichosporonales", "family": "Trichosporonaceae", "subfamily": ""}	20181212	ncbi	SAMN10458770	GCF_003942205.1	None	2018/12/12
aplpru1	Aplosporella	prunicola	CBS121167	{"clade": "dothideomyceta", "kingdom": "Fungi", "phylum": "Ascomycota", "subphylum": "Pezizomycotina", "class": "Dothideomycetes", "order": "Botryosphaeriales", "family": "Aplosporellaceae", "subfamily": ""}	v1.0	jgi		Aplpr1	20210414	Haridas S et al.,2020
apooss1.1	Apophysomyces	ossiformis		{"clade": "Opisthokonta", "kingdom": "Fungi", "phylum": "Mucoromycota", "subphylum": "Mucoromycotina", "class": "Mucoromycetes", "order": "Mucorales", "suborder": "Mucorineae", "family": "Mucoraceae", "subfamily": ""}	20201002	ncbi	SAMN10361476	GCA_014839865.1	None	2020/10/02
aposp.1	Apophysomyces	sp.	BC1021	{"clade": "Opisthokonta", "kingdom": "Fungi", "phylum": "Mucoromycota", "subphylum": "Mucoromycotina", "class": "Mucoromycetes", "order": "Mucorales", "suborder": "Mucorineae", "family": "Mucoraceae", "subfamily": ""}	20201216	ncbi	SAMN09083213	GCA_016097735.1	20210414	2020/12/16
aposp.2	Apophysomyces	sp.	BC1015	{"clade": "Opisthokonta", "kingdom": "Fungi", "phylum": "Mucoromycota", "subphylum": "Mucoromycotina", "class": "Mucoromycetes", "order": "Mucorales", "suborder": "Mucorineae", "family": "Mucoraceae", "subfamily": ""}	20201216	ncbi	SAMN09083227	GCA_016097715.1	20210414	2020/12/16
aposp.3	Apophysomyces	sp.	BC1034	{"clade": "Opisthokonta", "kingdom": "Fungi", "phylum": "Mucoromycota", "subphylum": "Mucoromycotina", "class": "Mucoromycetes", "order": "Mucorales", "suborder": "Mucorineae", "family": "Mucoraceae", "subfamily": ""}	20201216	ncbi	SAMN09083216	GCA_016097755.1	20210414	2020/12/16
armcep1	Armillaria	cepistipes	B5	{"clade": "Opisthokonta", "kingdom": "Fungi", "phylum": "Basidiomycota", "subphylum": "Agaricomycotina", "class": "Agaricomycetes", "subclass": "Agaricomycetidae", "order": "Agaricales", "family": "Physalacriaceae", "subfamily": ""}	0	jgi		Armcep1	20210414	Sipos G et al.,2017
armgal1	Armillaria	gallica	212	{"clade": "Opisthokonta", "kingdom": "Fungi", "phylum": "Basidiomycota", "subphylum": "Agaricomycotina", "class": "Agaricomycetes", "subclass": "Agaricomycetidae", "order": "Agaricales", "family": "Physalacriaceae", "subfamily": ""}	v1.0	jgi		Armga1	20210414	Sipos G et al.,2017
armmel2	Armillaria	mellea	DSM3731	{"clade": "Opisthokonta", "kingdom": "Fungi", "phylum": "Basidiomycota", "subphylum": "Agaricomycotina", "class": "Agaricomycetes", "subclass": "Agaricomycetidae", "order": "Agaricales", "family": "Physalacriaceae", "subfamily": ""}	0	jgi		Armme1_1	20210414	Collins C et al.,2013
armost1	Armillaria	ostoyae	C189	{"clade": "Opisthokonta", "kingdom": "Fungi", "phylum": "Basidiomycota", "subphylum": "Agaricomycotina", "class": "Agaricomycetes", "subclass": "Agaricomycetidae", "order": "Agaricales", "family": "Physalacriaceae", "subfamily": ""}	0	jgi	1283921	Armosto1	20210414	Sipos G et al.,2017
armsol1	Armillaria	solidipes	284	{"clade": "Opisthokonta", "kingdom": "Fungi", "phylum": "Basidiomycota", "subphylum": "Agaricomycotina", "class": "Agaricomycetes", "subclass": "Agaricomycetidae", "order": "Agaricales", "family": "Physalacriaceae", "subfamily": ""}	v1.0	jgi		Armost1	20210414	Sipos G et al.,2017
artben1	Arthroderma	benhamiae	CBS112371	{"clade": "leotiomyceta", "kingdom": "Fungi", "phylum": "Ascomycota", "subphylum": "Pezizomycotina", "class": "Eurotiomycetes", "subclass": "Eurotiomycetidae", "order": "Onygenales", "family": "Arthrodermataceae", "subfamily": ""}	0	jgi		Artbe1	20210414	Burmester A et al.,2011
artele1	Artolenzites	elegans	CIRMBRFM1122	{"kingdom": "Fungi", "phylum": "Basidiomycota", "subphylum": "Agaricomycotina", "class": "Agaricomycetes", "order": "Polyporales", "family": "Polyporaceae", "subfamily": ""}	v1.0	jgi		Artele1122_1	20210414	Hage H et al.,2021
artent1	Arthrobotrys	entomopaga		{"clade": "saccharomyceta", "kingdom": "Fungi", "phylum": "Ascomycota", "subphylum": "Pezizomycotina", "class": "Orbiliomycetes", "order": "Orbiliales", "family": "Orbiliaceae", "subfamily": ""}	20200408	ncbi	SAMN03653092	GCA_012184315.1	20210414	2020/04/08
artfla1.1	Arthrobotrys	flagrans		{"clade": "saccharomyceta", "kingdom": "Fungi", "phylum": "Ascomycota", "subphylum": "Pezizomycotina", "class": "Orbiliomycetes", "order": "Orbiliales", "family": "Orbiliaceae", "subfamily": ""}	20190404	ncbi	SAMN10185917	GCA_004000055.1	None	2019/01/08
artmat1.1	Arthromyces	matolae		{"clade": "Opisthokonta", "kingdom": "Fungi", "phylum": "Basidiomycota", "subphylum": "Agaricomycotina", "class": "Agaricomycetes", "subclass": "Agaricomycetidae", "order": "Agaricales", "family": "Tricholomataceae", "subfamily": ""}	2021-06-11	ncbi	artmat1	GCA_018855395.1	None	2021/06/11
artoli1	Arthrobotrys	oligospora	ATCC24927	{"clade": "saccharomyceta", "kingdom": "Fungi", "phylum": "Ascomycota", "subphylum": "Pezizomycotina", "class": "Orbiliomycetes", "order": "Orbiliales", "family": "Orbiliaceae", "subfamily": ""}	0	jgi		Artol1	20210414	Yang J et al.,2011
artunc1.1	Arthroderma	uncinatum		{"clade": "leotiomyceta", "kingdom": "Fungi", "phylum": "Ascomycota", "subphylum": "Pezizomycotina", "class": "Eurotiomycetes", "subclass": "Eurotiomycetidae", "order": "Onygenales", "family": "Arthrodermataceae", "subfamily": ""}	20200324	ncbi	SAMN13175249	GCF_011692745.1	None	2020/03/24
ascimm1	Ascobolus	immersus	RN42	{"clade": "saccharomyceta", "kingdom": "Fungi", "phylum": "Ascomycota", "subphylum": "Pezizomycotina", "class": "Pezizomycetes", "order": "Pezizales", "family": "Ascobolaceae", "subfamily": ""}	v1.0	jgi		Ascim1	20210414	Murat C et al.,2018
asclen1	Ascochyta	lentis		{"clade": "dothideomyceta", "kingdom": "Fungi", "phylum": "Ascomycota", "subphylum": "Pezizomycotina", "class": "Dothideomycetes", "subclass": "Pleosporomycetidae", "order": "Pleosporales", "suborder": "Pleosporineae", "family": "Didymellaceae", "subfamily": ""}	20201203	ncbi	SAMN10613129	GCA_004011705.1	20210414	2019/01/11
ascnig1	Ascodesmis	nigricans	CBS38968	{"clade": "saccharomyceta", "kingdom": "Fungi", "phylum": "Ascomycota", "subphylum": "Pezizomycotina", "class": "Pezizomycetes", "order": "Pezizales", "family": "Ascodesmidaceae", "subfamily": ""}	v1.0	jgi		Ascni1	20210414	Lütkenhaus R et al.,2019
ascrab1	Ascochyta	rabiei	ArDII	{"clade": "dothideomyceta", "kingdom": "Fungi", "phylum": "Ascomycota", "subphylum": "Pezizomycotina", "class": "Dothideomycetes", "subclass": "Pleosporomycetidae", "order": "Pleosporales", "suborder": "Pleosporineae", "family": "Didymellaceae", "subfamily": ""}	0	jgi	730361	Ascra1	20210414	Verma S et al.,2016
ascrub1	Ascoidea	rubescens	NRRLY17699	{"clade": "saccharomyceta", "kingdom": "Fungi", "phylum": "Ascomycota", "subphylum": "Saccharomycotina", "class": "Saccharomycetes", "order": "Saccharomycetales", "family": "Ascoideaceae", "subfamily": ""}	v1.0	jgi		Ascru1	20210421	Riley R et al.,2016
ascrub2.1	Ascoidea	rubescens	DSM1968	{"clade": "CUG-Ser2 clade", "kingdom": "Fungi", "phylum": "Ascomycota", "subphylum": "Saccharomycotina", "class": "Saccharomycetes", "order": "Saccharomycetales", "family": "Ascoideaceae", "subfamily": ""}	2016-09-15 00:00:00	ncbi	ascrub2	GCF_001661345.1	None	2016/06/10
ascsar1	Ascocoryne	sarcoides	NRRL50072	{"clade": "sordariomyceta", "kingdom": "Fungi", "phylum": "Ascomycota", "subphylum": "Pezizomycotina", "class": "Leotiomycetes", "order": "Helotiales", "family": "Gelatinodiscaceae", "subfamily": ""}	0	jgi	523978	Ascsa1	20210414	Gianoulis TA et al.,2012
aspacu1	Aspergillus	aculeatinus	CBS121060	{"clade": "leotiomyceta", "kingdom": "Fungi", "phylum": "Ascomycota", "subphylum": "Pezizomycotina", "class": "Eurotiomycetes", "subclass": "Eurotiomycetidae", "order": "Eurotiales", "family": "Aspergillaceae", "subfamily": ""}	v1.0	jgi		Aspacu1	20210414	Vesth TC et al.,2018
aspacu2.1	Aspergillus	aculeatus	ATCC16872	{"clade": "leotiomyceta", "kingdom": "Fungi", "phylum": "Ascomycota", "subphylum": "Pezizomycotina", "class": "Eurotiomycetes", "subclass": "Eurotiomycetidae", "order": "Eurotiales", "family": "Aspergillaceae", "subfamily": ""}	20161208	ncbi	SAMN00788628	GCF_001890905.1	None	2016/12/07
aspalb1	Aspergillus	albertensis		{"clade": "leotiomyceta", "kingdom": "Fungi", "phylum": "Ascomycota", "subphylum": "Pezizomycotina", "class": "Eurotiomycetes", "subclass": "Eurotiomycetidae", "order": "Eurotiales", "family": "Aspergillaceae", "subfamily": ""}	v1.0	jgi		Aspalbe1	20210414	Kjærbølling I et al.,2020
aspall1	Aspergillus	alliaceus	CBS53665	{"clade": "leotiomyceta", "kingdom": "Fungi", "phylum": "Ascomycota", "subphylum": "Pezizomycotina", "class": "Eurotiomycetes", "subclass": "Eurotiomycetidae", "order": "Eurotiales", "family": "Aspergillaceae", "subfamily": ""}	v1.0	jgi		Aspalli1	20210414	Kjærbølling I et al.,2020
aspara1	Aspergillus	arachidicola		{"clade": "leotiomyceta", "kingdom": "Fungi", "phylum": "Ascomycota", "subphylum": "Pezizomycotina", "class": "Eurotiomycetes", "subclass": "Eurotiomycetidae", "order": "Eurotiales", "family": "Aspergillaceae", "subfamily": ""}	v1.0	jgi		Aspara19utr	20210414	Kjærbølling I et al.,2020
aspave1	Aspergillus	avenaceus	IBT18842	{"clade": "leotiomyceta", "kingdom": "Fungi", "phylum": "Ascomycota", "subphylum": "Pezizomycotina", "class": "Eurotiomycetes", "subclass": "Eurotiomycetidae", "order": "Eurotiales", "family": "Aspergillaceae", "subfamily": ""}	v1.0	jgi		Aspave1	20210414	Kjærbølling I et al.,2020
aspawa1.1	Aspergillus	awamori		{"clade": "leotiomyceta", "kingdom": "Fungi", "phylum": "Ascomycota", "subphylum": "Pezizomycotina", "class": "Eurotiomycetes", "subclass": "Eurotiomycetidae", "order": "Eurotiales", "family": "Aspergillaceae", "subfamily": ""}	20181013	ncbi	SAMD00056021	GCA_003850985.1	None	2018/10/13
aspber1	Aspergillus	bertholletius	IBT29228	{"clade": "leotiomyceta", "kingdom": "Fungi", "phylum": "Ascomycota", "subphylum": "Pezizomycotina", "class": "Eurotiomycetes", "subclass": "Eurotiomycetidae", "order": "Eurotiales", "family": "Aspergillaceae", "subfamily": ""}	v1.0	jgi		Aspber1	20210414	Kjærbølling I et al.,2020
aspbom1	Aspergillus	bombycis	NRRL26010	{"clade": "leotiomyceta", "kingdom": "Fungi", "phylum": "Ascomycota", "subphylum": "Pezizomycotina", "class": "Eurotiomycetes", "subclass": "Eurotiomycetidae", "order": "Eurotiales", "family": "Aspergillaceae", "subfamily": ""}	0	jgi	829261	Aspbom1	20210414	Moore GG et al.,2016
aspbru1	Aspergillus	brunneoviolaceus	CBS62178	{"clade": "leotiomyceta", "kingdom": "Fungi", "phylum": "Ascomycota", "subphylum": "Pezizomycotina", "class": "Eurotiomycetes", "subclass": "Eurotiomycetidae", "order": "Eurotiales", "family": "Aspergillaceae", "subfamily": ""}	v1.0	jgi		Aspbru1	20210414	Vesth TC et al.,2018
aspbur1.1	Aspergillus	burnettii		{"clade": "leotiomyceta", "kingdom": "Fungi", "phylum": "Ascomycota", "subphylum": "Pezizomycotina", "class": "Eurotiomycetes", "subclass": "Eurotiomycetidae", "order": "Eurotiales", "family": "Aspergillaceae", "subfamily": ""}	20210107	ncbi	SAMN10782537	GCA_013421405.2	None	2020/07/17
aspcae1	Aspergillus	caelatus	CBS76397	{"clade": "leotiomyceta", "kingdom": "Fungi", "phylum": "Ascomycota", "subphylum": "Pezizomycotina", "class": "Eurotiomycetes", "subclass": "Eurotiomycetidae", "order": "Eurotiales", "family": "Aspergillaceae", "subfamily": ""}	v1.0	jgi		Aspcae1	20210414	Kjærbølling I et al.,2020
aspcal2	Aspergillus	calidoustus		{"clade": "leotiomyceta", "kingdom": "Fungi", "phylum": "Ascomycota", "subphylum": "Pezizomycotina", "class": "Eurotiomycetes", "subclass": "Eurotiomycetidae", "order": "Eurotiales", "family": "Aspergillaceae", "subfamily": ""}	0	jgi		Aspcal1	20210414	Horn F et al.,2016
aspcam1	Aspergillus	campestris	IBT28561	{"clade": "leotiomyceta", "kingdom": "Fungi", "phylum": "Ascomycota", "subphylum": "Pezizomycotina", "class": "Eurotiomycetes", "subclass": "Eurotiomycetidae", "order": "Eurotiales", "family": "Aspergillaceae", "subfamily": ""}	v1.0	jgi		Aspcam1	20210414	Kjærbølling I et al.,2018
aspcan2	Aspergillus	candidus	CBS10213	{"clade": "leotiomyceta", "kingdom": "Fungi", "phylum": "Ascomycota", "subphylum": "Pezizomycotina", "class": "Eurotiomycetes", "subclass": "Eurotiomycetidae", "order": "Eurotiales", "family": "Aspergillaceae", "subfamily": ""}	v1.0	jgi		Aspcand1	20210414	Kjærbølling I et al.,2018
aspcla2	Aspergillus	clavatus	NRRL1fromAspGD	{"clade": "leotiomyceta", "kingdom": "Fungi", "phylum": "Ascomycota", "subphylum": "Pezizomycotina", "class": "Eurotiomycetes", "subclass": "Eurotiomycetidae", "order": "Eurotiales", "family": "Aspergillaceae", "subfamily": ""}	0	jgi		Aspcl1	20210421	Arnaud MB et al.,2012
aspcla3.1	Aspergillus	clavatus	NRRL1	{"clade": "leotiomyceta", "kingdom": "Fungi", "phylum": "Ascomycota", "subphylum": "Pezizomycotina", "class": "Eurotiomycetes", "subclass": "Eurotiomycetidae", "order": "Eurotiales", "family": "Aspergillaceae", "subfamily": ""}	2014-08-06 00:00:00	ncbi	aspcla3	GCF_000002715.2	None	2005/09/09
aspcor2	Aspergillus	coremiiformis	CBS55377	{"clade": "leotiomyceta", "kingdom": "Fungi", "phylum": "Ascomycota", "subphylum": "Pezizomycotina", "class": "Eurotiomycetes", "subclass": "Eurotiomycetidae", "order": "Eurotiales", "family": "Aspergillaceae", "subfamily": ""}	v1.0	jgi		Aspcor1	20210414	Kjærbølling I et al.,2020
aspcos2	Aspergillus	costaricaensis	CBS115574	{"clade": "leotiomyceta", "kingdom": "Fungi", "phylum": "Ascomycota", "subphylum": "Pezizomycotina", "class": "Eurotiomycetes", "subclass": "Eurotiomycetidae", "order": "Eurotiales", "family": "Aspergillaceae", "subfamily": ""}	v1.0	jgi		Aspcos1	20210414	Vesth TC et al.,2018
aspcri1	Aspergillus	cristatus	GZAAS201005	{"clade": "leotiomyceta", "kingdom": "Fungi", "phylum": "Ascomycota", "subphylum": "Pezizomycotina", "class": "Eurotiomycetes", "subclass": "Eurotiomycetidae", "order": "Eurotiales", "family": "Aspergillaceae", "subfamily": ""}	0	jgi	788861	Aspcri1	20210414	Ge Y et al.,2016
aspell1	Aspergillus	ellipticus	CBS70779	{"clade": "leotiomyceta", "kingdom": "Fungi", "phylum": "Ascomycota", "subphylum": "Pezizomycotina", "class": "Eurotiomycetes", "subclass": "Eurotiomycetidae", "order": "Eurotiales", "family": "Aspergillaceae", "subfamily": ""}	v1.0	jgi		Aspell1	20210414	Vesth TC et al.,2018
aspeuc1	Aspergillus	eucalypticola	CBS122712	{"clade": "leotiomyceta", "kingdom": "Fungi", "phylum": "Ascomycota", "subphylum": "Pezizomycotina", "class": "Eurotiomycetes", "subclass": "Eurotiomycetidae", "order": "Eurotiales", "family": "Aspergillaceae", "subfamily": ""}	v1.0	jgi		Aspeuc1	20210414	Vesth TC et al.,2018
aspfel1	Aspergillus	felis		{"clade": "leotiomyceta", "kingdom": "Fungi", "phylum": "Ascomycota", "subphylum": "Pezizomycotina", "class": "Eurotiomycetes", "subclass": "Eurotiomycetidae", "order": "Eurotiales", "family": "Aspergillaceae", "subfamily": ""}	20200824	ncbi	SAMN14933833	GCA_014281915.1	20210414	2020/08/24
aspfel2	Aspergillus	felis		{"clade": "leotiomyceta", "kingdom": "Fungi", "phylum": "Ascomycota", "subphylum": "Pezizomycotina", "class": "Eurotiomycetes", "subclass": "Eurotiomycetidae", "order": "Eurotiales", "family": "Aspergillaceae", "subfamily": ""}	20200824	ncbi	SAMN14939804	GCA_014281895.1	20210414	2020/08/24
aspfij1	Aspergillus	fijiensis	CBS31389	{"clade": "leotiomyceta", "kingdom": "Fungi", "phylum": "Ascomycota", "subphylum": "Pezizomycotina", "class": "Eurotiomycetes", "subclass": "Eurotiomycetidae", "order": "Eurotiales", "family": "Aspergillaceae", "subfamily": ""}	v1.0	jgi	1769891	Aspfij1	20210414	Vesth TC et al.,2018
aspfis1.1	Aspergillus	fischeri	NRRL181	{"clade": "leotiomyceta", "kingdom": "Fungi", "phylum": "Ascomycota", "subphylum": "Pezizomycotina", "class": "Eurotiomycetes", "subclass": "Eurotiomycetidae", "order": "Eurotiales", "family": "Aspergillaceae", "subfamily": ""}	20140806	ncbi	SAMN02953637	GCF_000149645.3	None	2005/09/09
aspfis2.1	Aspergillus	fischeri		{"clade": "leotiomyceta", "kingdom": "Fungi", "phylum": "Ascomycota", "subphylum": "Pezizomycotina", "class": "Eurotiomycetes", "subclass": "Eurotiomycetidae", "order": "Eurotiales", "family": "Aspergillaceae", "subfamily": ""}	20210125	ncbi	SAMN13030798	GCA_016748045.1	None	2021/01/25
aspfla3	Aspergillus	flavus	NRRL3357	{"clade": "leotiomyceta", "kingdom": "Fungi", "phylum": "Ascomycota", "subphylum": "Pezizomycotina", "class": "Eurotiomycetes", "subclass": "Eurotiomycetidae", "order": "Eurotiales", "family": "Aspergillaceae", "subfamily": ""}	v1.0	jgi		Aspfl2_3	20210421	Skerker JM et al.,2021
aspfla4	Aspergillus	flavus	AF70	{"clade": "leotiomyceta", "kingdom": "Fungi", "phylum": "Ascomycota", "subphylum": "Pezizomycotina", "class": "Eurotiomycetes", "subclass": "Eurotiomycetidae", "order": "Eurotiales", "family": "Aspergillaceae", "subfamily": ""}	2018-02-07 00:00:00	ncbi	aspfla4	GCA_000952835.1	20210421	2015/03/13
aspfla5	Aspergillus	flavus	NRRL3357	{"clade": "leotiomyceta", "kingdom": "Fungi", "phylum": "Ascomycota", "subphylum": "Pezizomycotina", "class": "Eurotiomycetes", "subclass": "Eurotiomycetidae", "order": "Eurotiales", "family": "Aspergillaceae", "subfamily": ""}	0	jgi		Aspfl1	20210421	Arnaud MB et al.,2012
aspfum3	Aspergillus	fumigatus	Af293fromAspGD	{"clade": "leotiomyceta", "kingdom": "Fungi", "phylum": "Ascomycota", "subphylum": "Pezizomycotina", "class": "Eurotiomycetes", "subclass": "Eurotiomycetidae", "order": "Eurotiales", "family": "Aspergillaceae", "subfamily": ""}	0	jgi		Aspfu1	20210421	Nierman WC et al.,2005
aspfum4	Aspergillus	fumigatus	Z5	{"clade": "leotiomyceta", "kingdom": "Fungi", "phylum": "Ascomycota", "subphylum": "Pezizomycotina", "class": "Eurotiomycetes", "subclass": "Eurotiomycetidae", "order": "Eurotiales", "family": "Aspergillaceae", "subfamily": ""}	2015-06-23 00:00:00	ncbi	aspfum4	GCA_001029325.1	20210421	2015/06/17
aspfum5.1	Aspergillus	fumigatus	Af293	{"clade": "leotiomyceta", "kingdom": "Fungi", "phylum": "Ascomycota", "subphylum": "Pezizomycotina", "class": "Eurotiomycetes", "subclass": "Eurotiomycetidae", "order": "Eurotiales", "family": "Aspergillaceae", "subfamily": ""}	2014-08-04 00:00:00	ncbi	aspfum5	GCF_000002655.1	None	2005/06/01
aspfum6.1	Aspergillus	fumigatus	A1163	{"clade": "leotiomyceta", "kingdom": "Fungi", "phylum": "Ascomycota", "subphylum": "Pezizomycotina", "class": "Eurotiomycetes", "subclass": "Eurotiomycetidae", "order": "Eurotiales", "family": "Aspergillaceae", "subfamily": ""}	2014-08-04 00:00:00	ncbi	aspfum6	GCA_000150145.1	None	2007/06/26
aspfum7	Aspergillus	fumigatus	varRP2014	{"clade": "leotiomyceta", "kingdom": "Fungi", "phylum": "Ascomycota", "subphylum": "Pezizomycotina", "class": "Eurotiomycetes", "subclass": "Eurotiomycetidae", "order": "Eurotiales", "family": "Aspergillaceae", "subfamily": ""}	2014-07-18 00:00:00	ncbi	aspfum7	GCA_000731615.1	20210421	2014/07/18
aspgla1.1	Aspergillus	glaucus	CBS51665	{"clade": "leotiomyceta", "kingdom": "Fungi", "phylum": "Ascomycota", "subphylum": "Pezizomycotina", "class": "Eurotiomycetes", "subclass": "Eurotiomycetidae", "order": "Eurotiales", "family": "Aspergillaceae", "subfamily": ""}	2016-12-08 00:00:00	ncbi	aspgla1	GCF_001890805.1	None	2016/12/07
asphan1.1	Aspergillus	hancockii		{"clade": "leotiomyceta", "kingdom": "Fungi", "phylum": "Ascomycota", "subphylum": "Pezizomycotina", "class": "Eurotiomycetes", "subclass": "Eurotiomycetidae", "order": "Eurotiales", "family": "Aspergillaceae", "subfamily": ""}	20200918	ncbi	SAMN05375032	GCA_001696595.2	None	2016/07/29
asphet2	Aspergillus	heteromorphus	CBS11755	{"clade": "leotiomyceta", "kingdom": "Fungi", "phylum": "Ascomycota", "subphylum": "Pezizomycotina", "class": "Eurotiomycetes", "subclass": "Eurotiomycetidae", "order": "Eurotiales", "family": "Aspergillaceae", "subfamily": ""}	v1.0	jgi		Asphet1	20210414	Vesth TC et al.,2018
asphom1	Aspergillus	homomorphus	CBS101889	{"clade": "leotiomyceta", "kingdom": "Fungi", "phylum": "Ascomycota", "subphylum": "Pezizomycotina", "class": "Eurotiomycetes", "subclass": "Eurotiomycetidae", "order": "Eurotiales", "family": "Aspergillaceae", "subfamily": ""}	v1.0	jgi		Asphom1	20210414	Vesth TC et al.,2018
aspibe1	Aspergillus	ibericus	CBS121593	{"clade": "leotiomyceta", "kingdom": "Fungi", "phylum": "Ascomycota", "subphylum": "Pezizomycotina", "class": "Eurotiomycetes", "subclass": "Eurotiomycetidae", "order": "Eurotiales", "family": "Aspergillaceae", "subfamily": ""}	v1.0	jgi	1769911	Aspibe1	20210414	Vesth TC et al.,2018
aspind2	Aspergillus	indologenus	CBS11480	{"clade": "leotiomyceta", "kingdom": "Fungi", "phylum": "Ascomycota", "subphylum": "Pezizomycotina", "class": "Eurotiomycetes", "subclass": "Eurotiomycetidae", "order": "Eurotiales", "family": "Aspergillaceae", "subfamily": ""}	v1.0	jgi		Aspind1	20210414	Vesth TC et al.,2018
aspjap1	Aspergillus	japonicus	CBS11451	{"clade": "leotiomyceta", "kingdom": "Fungi", "phylum": "Ascomycota", "subphylum": "Pezizomycotina", "class": "Eurotiomycetes", "subclass": "Eurotiomycetidae", "order": "Eurotiales", "family": "Aspergillaceae", "subfamily": ""}	v1.0	jgi		Aspjap1	20210414	Vesth TC et al.,2018
aspkaw1	Aspergillus	kawachii	IFO4308	{"clade": "leotiomyceta", "kingdom": "Fungi", "phylum": "Ascomycota", "subphylum": "Pezizomycotina", "class": "Eurotiomycetes", "subclass": "Eurotiomycetidae", "order": "Eurotiales", "family": "Aspergillaceae", "subfamily": ""}	0	jgi	322908	Aspka1_1	20210414	Futagami T et al.,2011
asplep1	Aspergillus	leporis	CBS15166	{"clade": "leotiomyceta", "kingdom": "Fungi", "phylum": "Ascomycota", "subphylum": "Pezizomycotina", "class": "Eurotiomycetes", "subclass": "Eurotiomycetidae", "order": "Eurotiales", "family": "Aspergillaceae", "subfamily": ""}	v1.0	jgi		Asplep1	20210414	Kjærbølling I et al.,2020
aspluc2	Aspergillus	luchuensis	CBS10647	{"clade": "leotiomyceta", "kingdom": "Fungi", "phylum": "Ascomycota", "subphylum": "Pezizomycotina", "class": "Eurotiomycetes", "subclass": "Eurotiomycetidae", "order": "Eurotiales", "family": "Aspergillaceae", "subfamily": ""}	v1.0	jgi		Aspfo1	20210421	de Vries RP et al.,2017
aspluc3.1	Aspergillus	luchuensis	IFO4308	{"clade": "leotiomyceta", "kingdom": "Fungi", "phylum": "Ascomycota", "subphylum": "Pezizomycotina", "class": "Eurotiomycetes", "subclass": "Eurotiomycetidae", "order": "Eurotiales", "family": "Aspergillaceae", "subfamily": ""}	2015-09-16 00:00:00	ncbi	aspluc3	GCA_000239835.2	None	2011/10/27
aspmin1	Aspergillus	minisclerotigenes	CBS117635	{"clade": "leotiomyceta", "kingdom": "Fungi", "phylum": "Ascomycota", "subphylum": "Pezizomycotina", "class": "Eurotiomycetes", "subclass": "Eurotiomycetidae", "order": "Eurotiales", "family": "Aspergillaceae", "subfamily": ""}	v1.0	jgi		Aspmin1	20210414	Kjærbølling I et al.,2020
aspmul3	Aspergillus	mulundensis		{"clade": "leotiomyceta", "kingdom": "Fungi", "phylum": "Ascomycota", "subphylum": "Pezizomycotina", "class": "Eurotiomycetes", "subclass": "Eurotiomycetidae", "order": "Eurotiales", "family": "Aspergillaceae", "subfamily": ""}	20180810	ncbi	SAMN07195632	GCF_003369625.1	20210414	2018/08/10
aspnan1.1	Aspergillus	nanangensis		{"clade": "leotiomyceta", "kingdom": "Fungi", "phylum": "Ascomycota", "subphylum": "Pezizomycotina", "class": "Eurotiomycetes", "subclass": "Eurotiomycetidae", "order": "Eurotiales", "family": "Aspergillaceae", "subfamily": ""}	20201208	ncbi	SAMN11665376	GCA_015844325.1	None	2020/12/08
aspneo7	Aspergillus	neoniger	CBS115656	{"clade": "leotiomyceta", "kingdom": "Fungi", "phylum": "Ascomycota", "subphylum": "Pezizomycotina", "class": "Eurotiomycetes", "subclass": "Eurotiomycetidae", "order": "Eurotiales", "family": "Aspergillaceae", "subfamily": ""}	v1.0	jgi		Aspneo1	20210414	Vesth TC et al.,2018
aspnid1	Aspergillus	nidulans	FGSCA4	{"clade": "leotiomyceta", "kingdom": "Fungi", "phylum": "Ascomycota", "subphylum": "Pezizomycotina", "class": "Eurotiomycetes", "subclass": "Eurotiomycetidae", "order": "Eurotiales", "family": "Aspergillaceae", "subfamily": ""}	2015-02-27 00:00:00	ncbi	aspnid1	GCA_000011425.1	20210421	2009/09/24
aspnid2	Aspergillus	nidulans	FGSCA4	{"clade": "leotiomyceta", "kingdom": "Fungi", "phylum": "Ascomycota", "subphylum": "Pezizomycotina", "class": "Eurotiomycetes", "subclass": "Eurotiomycetidae", "order": "Eurotiales", "family": "Aspergillaceae", "subfamily": ""}	2014-08-06 00:00:00	ncbi	aspnid2	GCF_000149205.1	20210421	2003/04/07
aspnig2	Aspergillus	niger	vanTieghemATCC13496	{"clade": "leotiomyceta", "kingdom": "Fungi", "phylum": "Ascomycota", "subphylum": "Pezizomycotina", "class": "Eurotiomycetes", "subclass": "Eurotiomycetidae", "order": "Eurotiales", "family": "Aspergillaceae", "subfamily": ""}	v1.0	jgi		Aspni_bvT_1	20210414	Vesth TC et al.,2018
aspnig3	Aspergillus	niger	phoenicisCordaThomATCC13157	{"clade": "leotiomyceta", "kingdom": "Fungi", "phylum": "Ascomycota", "subphylum": "Pezizomycotina", "class": "Eurotiomycetes", "subclass": "Eurotiomycetidae", "order": "Eurotiales", "family": "Aspergillaceae", "subfamily": ""}	v1.0	jgi		Aspph1	20210414	Vesth TC et al.,2018
aspnig4	Aspergillus	niger	NRRL3	{"clade": "leotiomyceta", "kingdom": "Fungi", "phylum": "Ascomycota", "subphylum": "Pezizomycotina", "class": "Eurotiomycetes", "subclass": "Eurotiomycetidae", "order": "Eurotiales", "family": "Aspergillaceae", "subfamily": ""}	0	jgi		Aspni_NRRL3_1	20210414	Vesth TC et al.,2018~Aguilar-Pontes MV et al.,2018
aspnig5	Aspergillus	niger	ATCC1015	{"clade": "leotiomyceta", "kingdom": "Fungi", "phylum": "Ascomycota", "subphylum": "Pezizomycotina", "class": "Eurotiomycetes", "subclass": "Eurotiomycetidae", "order": "Eurotiales", "family": "Aspergillaceae", "subfamily": ""}	v4.0	jgi		Aspni7	20210414	Andersen MR et al.,2011
aspnig6	Aspergillus	niger	CBS51388	{"clade": "leotiomyceta", "kingdom": "Fungi", "phylum": "Ascomycota", "subphylum": "Pezizomycotina", "class": "Eurotiomycetes", "subclass": "Eurotiomycetidae", "order": "Eurotiales", "family": "Aspergillaceae", "subfamily": ""}	0	jgi		Aspni_DSM_1	20210414	Pel HJ et al.,2007
aspnig7	Aspergillus	niger	lacticoffeatusCBS101883	{"clade": "leotiomyceta", "kingdom": "Fungi", "phylum": "Ascomycota", "subphylum": "Pezizomycotina", "class": "Eurotiomycetes", "subclass": "Eurotiomycetidae", "order": "Eurotiales", "family": "Aspergillaceae", "subfamily": ""}	v1.0	jgi		Asplac1	20210421	Vesth TC et al.,2018
aspnig9.1	Aspergillus	niger	CBS101883	{"clade": "leotiomyceta", "kingdom": "Fungi", "phylum": "Ascomycota", "subphylum": "Pezizomycotina", "class": "Eurotiomycetes", "subclass": "Eurotiomycetidae", "order": "Eurotiales", "family": "Aspergillaceae", "subfamily": ""}	2018-06-12 00:00:00	ncbi	aspnig9	GCF_003184595.1	None	2018/06/04
aspnom1	Aspergillus	nomius	IBT12657	{"clade": "leotiomyceta", "kingdom": "Fungi", "phylum": "Ascomycota", "subphylum": "Pezizomycotina", "class": "Eurotiomycetes", "subclass": "Eurotiomycetidae", "order": "Eurotiales", "family": "Aspergillaceae", "subfamily": ""}	v1.0	jgi		Aspnom1	20210414	Kjærbølling I et al.,2020
aspnom2	Aspergillus	nomius	NRRL13137	{"clade": "leotiomyceta", "kingdom": "Fungi", "phylum": "Ascomycota", "subphylum": "Pezizomycotina", "class": "Eurotiomycetes", "subclass": "Eurotiomycetidae", "order": "Eurotiales", "family": "Aspergillaceae", "subfamily": ""}	0	jgi		Aspnom13137_1	20210414	Moore GG et al.,2015
aspnom3	Aspergillus	nomiae	NRRL13137	{"clade": "leotiomyceta", "kingdom": "Fungi", "phylum": "Ascomycota", "subphylum": "Pezizomycotina", "class": "Eurotiomycetes", "subclass": "Eurotiomycetidae", "order": "Eurotiales", "family": "Aspergillaceae", "subfamily": ""}	20200225	ncbi	SAMN02768702	GCF_001204775.2	20210414	2015/08/04
aspnov1	Aspergillus	novoparasiticus	CBS126849	{"clade": "leotiomyceta", "kingdom": "Fungi", "phylum": "Ascomycota", "subphylum": "Pezizomycotina", "class": "Eurotiomycetes", "subclass": "Eurotiomycetidae", "order": "Eurotiales", "family": "Aspergillaceae", "subfamily": ""}	v1.0	jgi		Aspnovo1	20210414	Kjærbølling I et al.,2020
aspnov2	Aspergillus	novofumigatus	IBT16806	{"clade": "leotiomyceta", "kingdom": "Fungi", "phylum": "Ascomycota", "subphylum": "Pezizomycotina", "class": "Eurotiomycetes", "subclass": "Eurotiomycetidae", "order": "Eurotiales", "family": "Aspergillaceae", "subfamily": ""}	v1.0	jgi		Aspnov1	20210414	Kjærbølling I et al.,2018
aspoch1	Aspergillus	ochraceoroseus	IBT24754	{"clade": "leotiomyceta", "kingdom": "Fungi", "phylum": "Ascomycota", "subphylum": "Pezizomycotina", "class": "Eurotiomycetes", "subclass": "Eurotiomycetidae", "order": "Eurotiales", "family": "Aspergillaceae", "subfamily": ""}	v1.0	jgi		Aspoch1	20210414	Kjærbølling I et al.,2018
aspoch2	Aspergillus	ochraceoroseus	SRRC1432	{"clade": "leotiomyceta", "kingdom": "Fungi", "phylum": "Ascomycota", "subphylum": "Pezizomycotina", "class": "Eurotiomycetes", "subclass": "Eurotiomycetidae", "order": "Eurotiales", "family": "Aspergillaceae", "subfamily": ""}	0	jgi		Aspoch1432_1	20210414	Moore GG et al.,2015
aspory1	Aspergillus	oryzae	RIB40	{"clade": "leotiomyceta", "kingdom": "Fungi", "phylum": "Ascomycota", "subphylum": "Pezizomycotina", "class": "Eurotiomycetes", "subclass": "Eurotiomycetidae", "order": "Eurotiales", "family": "Aspergillaceae", "subfamily": ""}	0	jgi		Aspor1	20210421	Arnaud MB et al.,2012~Machida M et al.,2005
aspory2.1	Aspergillus	oryzae	3042	{"clade": "leotiomyceta", "kingdom": "Fungi", "phylum": "Ascomycota", "subphylum": "Pezizomycotina", "class": "Eurotiomycetes", "subclass": "Eurotiomycetidae", "order": "Eurotiales", "family": "Aspergillaceae", "subfamily": ""}	2014-08-11 00:00:00	ncbi	aspory2	GCA_000269785.2	None	2012/06/18
aspory3	Aspergillus	oryzae	1008	{"clade": "leotiomyceta", "kingdom": "Fungi", "phylum": "Ascomycota", "subphylum": "Pezizomycotina", "class": "Eurotiomycetes", "subclass": "Eurotiomycetidae", "order": "Eurotiales", "family": "Aspergillaceae", "subfamily": ""}	2014-06-13 00:00:00	ncbi	aspory3	GCA_000691885.1	20210421	2014/05/16
asppar1	Aspergillus	parvisclerotigenus	CBS12162	{"clade": "leotiomyceta", "kingdom": "Fungi", "phylum": "Ascomycota", "subphylum": "Pezizomycotina", "class": "Eurotiomycetes", "subclass": "Eurotiomycetidae", "order": "Eurotiales", "family": "Aspergillaceae", "subfamily": ""}	v1.0	jgi		Asppari1	20210414	Kjærbølling I et al.,2020
asppar4	Aspergillus	parasiticus	CBS117618	{"clade": "leotiomyceta", "kingdom": "Fungi", "phylum": "Ascomycota", "subphylum": "Pezizomycotina", "class": "Eurotiomycetes", "subclass": "Eurotiomycetidae", "order": "Eurotiales", "family": "Aspergillaceae", "subfamily": ""}	v1.0	jgi		Asppar1	20210421	Kjærbølling I et al.,2020
asppip1	Aspergillus	piperis	CBS112811	{"clade": "leotiomyceta", "kingdom": "Fungi", "phylum": "Ascomycota", "subphylum": "Pezizomycotina", "class": "Eurotiomycetes", "subclass": "Eurotiomycetidae", "order": "Eurotiales", "family": "Aspergillaceae", "subfamily": ""}	v1.0	jgi		Asppip1	20210414	Vesth TC et al.,2018
asppse10.1	Aspergillus	pseudonomiae		{"clade": "leotiomyceta", "kingdom": "Fungi", "phylum": "Ascomycota", "subphylum": "Pezizomycotina", "class": "Eurotiomycetes", "subclass": "Eurotiomycetidae", "order": "Eurotiales", "family": "Aspergillaceae", "subfamily": ""}	20200204	ncbi	SAMN05446748	GCA_009176395.1	None	2019/10/18
asppse11	Aspergillus	pseudoterreus	ATCC32359	{"clade": "leotiomyceta", "kingdom": "Fungi", "phylum": "Ascomycota", "subphylum": "Pezizomycotina", "class": "Eurotiomycetes", "subclass": "Eurotiomycetidae", "order": "Eurotiales", "family": "Aspergillaceae", "subfamily": ""}	v1.0	jgi	1560731	Asppseute1	20211019	Deng S et al.,2020
asppse6	Aspergillus	pseudonomius	CBS119388	{"clade": "leotiomyceta", "kingdom": "Fungi", "phylum": "Ascomycota", "subphylum": "Pezizomycotina", "class": "Eurotiomycetes", "subclass": "Eurotiomycetidae", "order": "Eurotiales", "family": "Aspergillaceae", "subfamily": ""}	v1.0	jgi		Asppsen1	20210414	Kjærbølling I et al.,2020
asppse7	Aspergillus	pseudotamarii	CBS117625	{"clade": "leotiomyceta", "kingdom": "Fungi", "phylum": "Ascomycota", "subphylum": "Pezizomycotina", "class": "Eurotiomycetes", "subclass": "Eurotiomycetidae", "order": "Eurotiales", "family": "Aspergillaceae", "subfamily": ""}	v1.0	jgi		Asppset1	20210414	Kjærbølling I et al.,2020
asppse8	Aspergillus	pseudocaelatus	CBS117616	{"clade": "leotiomyceta", "kingdom": "Fungi", "phylum": "Ascomycota", "subphylum": "Pezizomycotina", "class": "Eurotiomycetes", "subclass": "Eurotiomycetidae", "order": "Eurotiales", "family": "Aspergillaceae", "subfamily": ""}	v1.0	jgi		Asppsec1	20210414	Kjærbølling I et al.,2020
asppse9.1	Aspergillus	pseudonomiae		{"clade": "leotiomyceta", "kingdom": "Fungi", "phylum": "Ascomycota", "subphylum": "Pezizomycotina", "class": "Eurotiomycetes", "subclass": "Eurotiomycetidae", "order": "Eurotiales", "family": "Aspergillaceae", "subfamily": ""}	20191104	ncbi	SAMN05446751	GCF_009193645.1	None	2019/10/18
aspram2	Aspergillus	rambellii	SRRC1468	{"clade": "leotiomyceta", "kingdom": "Fungi", "phylum": "Ascomycota", "subphylum": "Pezizomycotina", "class": "Eurotiomycetes", "subclass": "Eurotiomycetidae", "order": "Eurotiales", "family": "Aspergillaceae", "subfamily": ""}	0	jgi	329161	Aspram1	20210414	Moore GG et al.,2015
asprub1.1	Aspergillus	ruber	CBS135680	{"clade": "leotiomyceta", "kingdom": "Fungi", "phylum": "Ascomycota", "subphylum": "Pezizomycotina", "class": "Eurotiomycetes", "subclass": "Eurotiomycetidae", "order": "Eurotiales", "family": "Aspergillaceae", "subfamily": ""}	20140916	ncbi	SAMN02744096	GCF_000600275.1	None	2014/03/25
aspsac1	Aspergillus	saccharolyticus	JOP10301	{"clade": "leotiomyceta", "kingdom": "Fungi", "phylum": "Ascomycota", "subphylum": "Pezizomycotina", "class": "Eurotiomycetes", "subclass": "Eurotiomycetidae", "order": "Eurotiales", "family": "Aspergillaceae", "subfamily": ""}	v1.0	jgi		Aspsac1	20210414	Vesth TC et al.,2018
aspscl2	Aspergillus	sclerotiicarbonarius	CBS121057	{"clade": "leotiomyceta", "kingdom": "Fungi", "phylum": "Ascomycota", "subphylum": "Pezizomycotina", "class": "Eurotiomycetes", "subclass": "Eurotiomycetidae", "order": "Eurotiales", "family": "Aspergillaceae", "subfamily": ""}	v1.0	jgi		Aspscle1	20210414	Vesth TC et al.,2018
aspscl3	Aspergillus	sclerotioniger	CBS115572	{"clade": "leotiomyceta", "kingdom": "Fungi", "phylum": "Ascomycota", "subphylum": "Pezizomycotina", "class": "Eurotiomycetes", "subclass": "Eurotiomycetidae", "order": "Eurotiales", "family": "Aspergillaceae", "subfamily": ""}	v1.0	jgi		Aspscl1	20210414	Vesth TC et al.,2018
aspscl4	Aspergillus	sclerotialis		{"clade": "leotiomyceta", "kingdom": "Fungi", "phylum": "Ascomycota", "subphylum": "Pezizomycotina", "class": "Eurotiomycetes", "subclass": "Eurotiomycetidae", "order": "Eurotiales", "family": "Aspergillaceae", "subfamily": ""}	20180921	ncbi	SAMN06279797	GCA_003589665.1	20210414	2018/09/21
aspser1	Aspergillus	sergii	CBS130017	{"clade": "leotiomyceta", "kingdom": "Fungi", "phylum": "Ascomycota", "subphylum": "Pezizomycotina", "class": "Eurotiomycetes", "subclass": "Eurotiomycetidae", "order": "Eurotiales", "family": "Aspergillaceae", "subfamily": ""}	v1.0	jgi		Aspser1	20210414	Kjærbølling I et al.,2020
aspsp.1	Aspergillus	sp.	HF37	{"clade": "leotiomyceta", "kingdom": "Fungi", "phylum": "Ascomycota", "subphylum": "Pezizomycotina", "class": "Eurotiomycetes", "subclass": "Eurotiomycetidae", "order": "Eurotiales", "family": "Aspergillaceae", "subfamily": ""}	20181030	ncbi	SAMN06341106	GCA_003698115.1	20210414	2018/10/30
aspste3	Aspergillus	steynii	IBT23096	{"clade": "leotiomyceta", "kingdom": "Fungi", "phylum": "Ascomycota", "subphylum": "Pezizomycotina", "class": "Eurotiomycetes", "subclass": "Eurotiomycetidae", "order": "Eurotiales", "family": "Aspergillaceae", "subfamily": ""}	v1.0	jgi		Aspste1	20210414	Kjærbølling I et al.,2018
aspsyd1	Aspergillus	sydowii	CBS59365	{"clade": "leotiomyceta", "kingdom": "Fungi", "phylum": "Ascomycota", "subphylum": "Pezizomycotina", "class": "Eurotiomycetes", "subclass": "Eurotiomycetidae", "order": "Eurotiales", "family": "Aspergillaceae", "subfamily": ""}	v1.0	jgi		Aspsy1	20210414	de Vries RP et al.,2017
asptai1	Aspergillus	taichungensis	IBT19404	{"clade": "leotiomyceta", "kingdom": "Fungi", "phylum": "Ascomycota", "subphylum": "Pezizomycotina", "class": "Eurotiomycetes", "subclass": "Eurotiomycetidae", "order": "Eurotiales", "family": "Aspergillaceae", "subfamily": ""}	v1.0	jgi		Asptaic1	20210414	Kjærbølling I et al.,2018
asptam1	Aspergillus	tamarii	CBS117626	{"clade": "leotiomyceta", "kingdom": "Fungi", "phylum": "Ascomycota", "subphylum": "Pezizomycotina", "class": "Eurotiomycetes", "subclass": "Eurotiomycetidae", "order": "Eurotiales", "family": "Aspergillaceae", "subfamily": ""}	v1.0	jgi		Asptam1	20210414	Kjærbølling I et al.,2020
aspter1	Aspergillus	terreus	NIH2624	{"clade": "leotiomyceta", "kingdom": "Fungi", "phylum": "Ascomycota", "subphylum": "Pezizomycotina", "class": "Eurotiomycetes", "subclass": "Eurotiomycetidae", "order": "Eurotiales", "family": "Aspergillaceae", "subfamily": ""}	0	jgi	292278	Aspte1	20210414	Arnaud MB et al.,2012
asptra2	Aspergillus	transmontanensis	CBS130015	{"clade": "leotiomyceta", "kingdom": "Fungi", "phylum": "Ascomycota", "subphylum": "Pezizomycotina", "class": "Eurotiomycetes", "subclass": "Eurotiomycetidae", "order": "Eurotiales", "family": "Aspergillaceae", "subfamily": ""}	v1.0	jgi		Asptra1	20210414	Kjærbølling I et al.,2020
aspuda1	Aspergillus	udagawae	IFM46973	{"clade": "leotiomyceta", "kingdom": "Fungi", "phylum": "Ascomycota", "subphylum": "Pezizomycotina", "class": "Eurotiomycetes", "subclass": "Eurotiomycetidae", "order": "Eurotiales", "family": "Aspergillaceae", "subfamily": ""}	0	jgi	376421	Aspuda1	20210414	Kusuya Y et al.,2015
aspuva1	Aspergillus	uvarum	CBS121591	{"clade": "leotiomyceta", "kingdom": "Fungi", "phylum": "Ascomycota", "subphylum": "Pezizomycotina", "class": "Eurotiomycetes", "subclass": "Eurotiomycetidae", "order": "Eurotiales", "family": "Aspergillaceae", "subfamily": ""}	v1.0	jgi		Aspuva1	20210414	Vesth TC et al.,2018
aspvad1	Aspergillus	vadensis	CBS113365	{"clade": "leotiomyceta", "kingdom": "Fungi", "phylum": "Ascomycota", "subphylum": "Pezizomycotina", "class": "Eurotiomycetes", "subclass": "Eurotiomycetidae", "order": "Eurotiales", "family": "Aspergillaceae", "subfamily": ""}	v1.0	jgi		Aspvad1	20210414	Vesth TC et al.,2018
aspver1.1	Aspergillus	versicolor	CBS58365	{"clade": "leotiomyceta", "kingdom": "Fungi", "phylum": "Ascomycota", "subphylum": "Pezizomycotina", "class": "Eurotiomycetes", "subclass": "Eurotiomycetidae", "order": "Eurotiales", "family": "Aspergillaceae", "subfamily": ""}	2016-12-06 00:00:00	ncbi	aspver1	GCF_001890125.1	None	2016/12/06
aspvio1	Aspergillus	violaceofuscus	CBS115571	{"clade": "leotiomyceta", "kingdom": "Fungi", "phylum": "Ascomycota", "subphylum": "Pezizomycotina", "class": "Eurotiomycetes", "subclass": "Eurotiomycetidae", "order": "Eurotiales", "family": "Aspergillaceae", "subfamily": ""}	v1.0	jgi		Aspvio1	20210414	Vesth TC et al.,2018
aspwel1	Aspergillus	welwitschiae	CBS13954b	{"clade": "leotiomyceta", "kingdom": "Fungi", "phylum": "Ascomycota", "subphylum": "Pezizomycotina", "class": "Eurotiomycetes", "subclass": "Eurotiomycetidae", "order": "Eurotiales", "family": "Aspergillaceae", "subfamily": ""}	v1.0	jgi		Aspwel1	20210414	Vesth TC et al.,2018
aspwen1.1	Aspergillus	wentii	DTO134E9	{"clade": "leotiomyceta", "kingdom": "Fungi", "phylum": "Ascomycota", "subphylum": "Pezizomycotina", "class": "Eurotiomycetes", "subclass": "Eurotiomycetidae", "order": "Eurotiales", "family": "Aspergillaceae", "subfamily": ""}	2016-12-08 00:00:00	ncbi	aspwen1	GCF_001890725.1	None	2016/12/07
aspzon1	Aspergillus	zonatus		{"clade": "leotiomyceta", "kingdom": "Fungi", "phylum": "Ascomycota", "subphylum": "Pezizomycotina", "class": "Eurotiomycetes", "subclass": "Eurotiomycetidae", "order": "Eurotiales", "family": "Aspergillaceae", "subfamily": ""}	v1.0	jgi		Aspzo1	20210414	de Vries RP et al.,2017
astodo1	Astraeus	odoratus		{"clade": "Opisthokonta", "kingdom": "Fungi", "phylum": "Basidiomycota", "subphylum": "Agaricomycotina", "class": "Agaricomycetes", "subclass": "Agaricomycetidae", "order": "Boletales", "suborder": "Sclerodermatineae", "family": "Astraeaceae", "subfamily": ""}	2021-05-17	ncbi	astodo1	GCA_016618355.2	20210709	2021/01/12
astpar1.1	Asterophora	parasitica		{"clade": "Opisthokonta", "kingdom": "Fungi", "phylum": "Basidiomycota", "subphylum": "Agaricomycotina", "class": "Agaricomycetes", "subclass": "Agaricomycetidae", "order": "Agaricales", "family": "Lyophyllaceae", "subfamily": ""}	2021-05-05	ncbi	astpar1	GCA_018282005.1	None	2021/05/05
astsub1	Astrocystis	sublimbata	CBS130006	{"clade": "sordariomyceta", "kingdom": "Fungi", "phylum": "Ascomycota", "subphylum": "Pezizomycotina", "class": "Sordariomycetes", "subclass": "Xylariomycetidae", "order": "Xylariales", "family": "Xylariaceae", "subfamily": ""}	v1.0	jgi		Astsub1	20210414	Franco MEE et al.,2022
athara1.1	Athelia	arachnoidea	814	{"clade": "Opisthokonta", "kingdom": "Fungi", "phylum": "Basidiomycota", "subphylum": "Agaricomycotina", "class": "Agaricomycetes", "subclass": "Agaricomycetidae", "order": "Atheliales", "family": "Atheliaceae", "subfamily": ""}	2	new		athara1	None	True
athara2.1	Athelia	arachnoidea	CBS41872	{"clade": "Opisthokonta", "kingdom": "Fungi", "phylum": "Basidiomycota", "subphylum": "Agaricomycotina", "class": "Agaricomycetes", "subclass": "Agaricomycetidae", "order": "Atheliales", "family": "Atheliaceae", "subfamily": ""}	2	new		athara2	None	True
athdec1.1	Athelia	decipiens	HHB12709Sp	{"clade": "Opisthokonta", "kingdom": "Fungi", "phylum": "Basidiomycota", "subphylum": "Agaricomycotina", "class": "Agaricomycetes", "subclass": "Agaricomycetidae", "order": "Atheliales", "family": "Atheliaceae", "subfamily": ""}	2	new		athdec1	None	True
athepi1.1	Athelia	epiphylla	FP133892T	{"clade": "Opisthokonta", "kingdom": "Fungi", "phylum": "Basidiomycota", "subphylum": "Agaricomycotina", "class": "Agaricomycetes", "subclass": "Agaricomycetidae", "order": "Atheliales", "family": "Atheliaceae", "subfamily": ""}	2	new		athepi1	None	True
athter1.1	Athelia	termitophila	TMB2	{"clade": "Opisthokonta", "kingdom": "Fungi", "phylum": "Basidiomycota", "subphylum": "Agaricomycotina", "class": "Agaricomycetes", "subclass": "Agaricomycetidae", "order": "Atheliales", "family": "Atheliaceae", "subfamily": ""}	2	new		athtmb2	None	True
athter2.2	Athelia	termitophila	TMB5	{"clade": "Opisthokonta", "kingdom": "Fungi", "phylum": "Basidiomycota", "subphylum": "Agaricomycotina", "class": "Agaricomycetes", "subclass": "Agaricomycetidae", "order": "Atheliales", "family": "Atheliaceae", "subfamily": ""}	4	new	SAMN15352002	GCA_014898675.1	None	Konkel et al., 2021
auramp1	Auriculariopsis	ampla	NL1724	{"clade": "Opisthokonta", "kingdom": "Fungi", "phylum": "Basidiomycota", "subphylum": "Agaricomycotina", "class": "Agaricomycetes", "subclass": "Agaricomycetidae", "order": "Agaricales", "family": "Schizophyllaceae", "subfamily": ""}	v1.0	jgi	3843771	Auramp1	20210414	Almási É et al.,2019
aurmel1	Aureobasidium	melanogenum	CBS110374	{"clade": "dothideomyceta", "kingdom": "Fungi", "phylum": "Ascomycota", "subphylum": "Pezizomycotina", "class": "Dothideomycetes", "subclass": "Dothideomycetidae", "order": "Dothideales", "family": "Saccotheciaceae", "subfamily": ""}	20140708	ncbi	SAMN02744098	GCF_000721775.1	20210414	2014/07/02
aurmus1	Aureobasidium	mustum		{"clade": "dothideomyceta", "kingdom": "Fungi", "phylum": "Ascomycota", "subphylum": "Pezizomycotina", "class": "Dothideomycetes", "subclass": "Dothideomycetidae", "order": "Dothideales", "family": "Saccotheciaceae", "subfamily": ""}	2020-10-10	ncbi	aurmus1	GCA_903819665.1	20211019	2020/10/10
aurnam1	Aureobasidium	namibiae	CBS14797	{"clade": "dothideomyceta", "kingdom": "Fungi", "phylum": "Ascomycota", "subphylum": "Pezizomycotina", "class": "Dothideomycetes", "subclass": "Dothideomycetidae", "order": "Dothideales", "family": "Saccotheciaceae", "subfamily": ""}	20150406	ncbi	SAMN02744099	GCF_000721765.1	20210414	2014/07/02
aurpul1	Aureobasidium	pullulans	NBB721	{"clade": "dothideomyceta", "kingdom": "Fungi", "phylum": "Ascomycota", "subphylum": "Pezizomycotina", "class": "Dothideomycetes", "subclass": "Dothideomycetidae", "order": "Dothideales", "family": "Saccotheciaceae", "subfamily": ""}	v1.0	jgi		AurpulNBB1	20210414	Rueda-Mejia MP et al.,2021
aurpul2	Aureobasidium	pullulans	varmelanogenumCBS110374	{"clade": "dothideomyceta", "kingdom": "Fungi", "phylum": "Ascomycota", "subphylum": "Pezizomycotina", "class": "Dothideomycetes", "subclass": "Dothideomycetidae", "order": "Dothideales", "family": "Saccotheciaceae", "subfamily": ""}	0	jgi		Aurpu_var_mel1	20210414	Gostin?ar C et al.,2014
aurpul3	Aureobasidium	pullulans	varnamibiaeCBS14797	{"clade": "dothideomyceta", "kingdom": "Fungi", "phylum": "Ascomycota", "subphylum": "Pezizomycotina", "class": "Dothideomycetes", "subclass": "Dothideomycetidae", "order": "Dothideales", "family": "Saccotheciaceae", "subfamily": ""}	0	jgi		Aurpu_var_nam1	20210414	Gostin?ar C et al.,2014
aurpul4	Aureobasidium	pullulans	varpullulansEXF150	{"clade": "dothideomyceta", "kingdom": "Fungi", "phylum": "Ascomycota", "subphylum": "Pezizomycotina", "class": "Dothideomycetes", "subclass": "Dothideomycetidae", "order": "Dothideales", "family": "Saccotheciaceae", "subfamily": ""}	0	jgi	194661	Aurpu_var_pul1	20210414	Gostin?ar C et al.,2014
aurpul5	Aureobasidium	pullulans	varsubglacialeEXF2481	{"clade": "dothideomyceta", "kingdom": "Fungi", "phylum": "Ascomycota", "subphylum": "Pezizomycotina", "class": "Dothideomycetes", "subclass": "Dothideomycetidae", "order": "Dothideales", "family": "Saccotheciaceae", "subfamily": ""}	0	jgi		Aurpu_var_sub1	20210414	Gostin?ar C et al.,2014
aurpul6	Aureobasidium	pullulans	EXF150	{"clade": "dothideomyceta", "kingdom": "Fungi", "phylum": "Ascomycota", "subphylum": "Pezizomycotina", "class": "Dothideomycetes", "subclass": "Dothideomycetidae", "order": "Dothideales", "family": "Saccotheciaceae", "subfamily": ""}	2014-07-08 00:00:00	ncbi	aurpul6	GCF_000721785.1	20210421	2014/07/02
aursp.1	Aureobasidium	sp.	EXF3399	{"clade": "dothideomyceta", "kingdom": "Fungi", "phylum": "Ascomycota", "subphylum": "Pezizomycotina", "class": "Dothideomycetes", "subclass": "Dothideomycetidae", "order": "Dothideales", "family": "Saccotheciaceae", "subfamily": ""}	2021-09-10	ncbi	aursp.1	GCA_019924955.1	20211019	2021/09/10
aursub2	Aureobasidium	subglaciale	EXF2481	{"clade": "dothideomyceta", "kingdom": "Fungi", "phylum": "Ascomycota", "subphylum": "Pezizomycotina", "class": "Dothideomycetes", "subclass": "Dothideomycetidae", "order": "Dothideales", "family": "Saccotheciaceae", "subfamily": ""}	20140708	ncbi	SAMN02744088	GCF_000721755.1	20210414	2014/07/02
aursub3.1	Auricularia	subglabra	TFB10046SS5	{"clade": "Opisthokonta", "kingdom": "Fungi", "phylum": "Basidiomycota", "subphylum": "Agaricomycotina", "class": "Agaricomycetes", "order": "Auriculariales", "family": "Auriculariaceae", "subfamily": ""}	2015-11-02 00:00:00	ncbi	aursub3	GCF_000265015.1	None	2012/06/04
auruva1	Aureobasidium	uvarum		{"clade": "dothideomyceta", "kingdom": "Fungi", "phylum": "Ascomycota", "subphylum": "Pezizomycotina", "class": "Dothideomycetes", "subclass": "Dothideomycetidae", "order": "Dothideales", "family": "Saccotheciaceae", "subfamily": ""}	2020-10-10	ncbi	auruva1	GCA_903853725.1	20211019	2020/10/10
aurvin1	Aureobasidium	vineae		{"clade": "dothideomyceta", "kingdom": "Fungi", "phylum": "Ascomycota", "subphylum": "Pezizomycotina", "class": "Dothideomycetes", "subclass": "Dothideomycetidae", "order": "Dothideales", "family": "Saccotheciaceae", "subfamily": ""}	2020-10-10	ncbi	aurvin1	GCA_903819635.1	20211019	2020/10/10
aurvul1	Auriscalpium	vulgare	FP105234Sp	{"clade": "Opisthokonta", "kingdom": "Fungi", "phylum": "Basidiomycota", "subphylum": "Agaricomycotina", "class": "Agaricomycetes", "order": "Russulales", "family": "Auriscalpiaceae", "subfamily": ""}	v1.0	jgi		Aurvu1	20210414	Looney B et al.,2022
auspsi1	Austropuccinia	psidii	MF1	{"clade": "Opisthokonta", "kingdom": "Fungi", "phylum": "Basidiomycota", "subphylum": "Pucciniomycotina", "class": "Pucciniomycetes", "order": "Pucciniales", "family": "Sphaerophragmiaceae", "subfamily": ""}	2021-07-19	ncbi	auspsi1	GCA_000469055.2	20210914	2013/09/19
babino1	Babjeviella	inositovora	NRRLY12698	{"clade": "saccharomyceta", "kingdom": "Fungi", "phylum": "Ascomycota", "subphylum": "Saccharomycotina", "class": "Saccharomycetes", "order": "Saccharomycetales", "family": "Debaryomycetaceae", "subfamily": ""}	v1.0	jgi	792231	Babin1	20210414	Riley R et al.,2016
bacgig1.1	Bacidia	gigantensis		{"clade": "OSLEUM clade", "kingdom": "Fungi", "phylum": "Ascomycota", "subphylum": "Pezizomycotina", "class": "Lecanoromycetes", "subclass": "Lecanoromycetidae", "order": "Lecanorales", "suborder": "Lecanorineae", "family": "Ramalinaceae", "subfamily": ""}	2021-08-06	ncbi	bacgig1	GCF_019456465.1	None	2021/08/06
basmer1	Basidiobolus	meristosporus	CBS93173	{"clade": "Opisthokonta", "kingdom": "Fungi", "phylum": "Zoopagomycota", "subphylum": "Entomophthoromycotina", "class": "Basidiobolomycetes", "order": "Basidiobolales", "family": "Basidiobolaceae", "subfamily": ""}	v1.0	jgi		Basme2finSC	20210414	Mondo SJ et al.,2017
batden1	Batrachochytrium	dendrobatidis	JAM81	{"clade": "Opisthokonta", "kingdom": "Fungi", "phylum": "Chytridiomycota", "class": "Chytridiomycetes", "order": "Rhizophydiales", "subphylum": "", "family": "", "subfamily": ""}	20140801	ncbi	SAMN02746048	GCF_000203795.1	20210414	2011/04/07
batden2.1	Batrachochytrium	dendrobatidis	JEL423	{"clade": "Opisthokonta", "kingdom": "Fungi", "phylum": "Chytridiomycota", "class": "Chytridiomycetes", "order": "Rhizophydiales", "subphylum": "", "family": "", "subfamily": ""}	20160516	ncbi	SAMN02953669	GCA_000149865.1	None	2006/10/20
batsal1	Batrachochytrium	salamandrivorans	BS	{"clade": "Opisthokonta", "kingdom": "Fungi", "phylum": "Chytridiomycota", "class": "Chytridiomycetes", "order": "Rhizophydiales", "subphylum": "", "family": "", "subfamily": ""}	0	jgi	1012971	Batsa1	20210414	Farrer RA et al.,2017
baucom1	Baudoinia	compniacensis	UAMH107624089826	{"clade": "dothideomyceta", "kingdom": "Fungi", "phylum": "Ascomycota", "subphylum": "Pezizomycotina", "class": "Dothideomycetes", "subclass": "Dothideomycetidae", "order": "Mycosphaerellales", "family": "Teratosphaeriaceae", "subfamily": ""}	v1.0	jgi		Bauco1	20210414	Ohm RA et al.,2012
baupan1.1	Baudoinia	panamericana	UAMH10762	{"clade": "dothideomyceta", "kingdom": "Fungi", "phylum": "Ascomycota", "subphylum": "Pezizomycotina", "class": "Dothideomycetes", "subclass": "Dothideomycetidae", "order": "Mycosphaerellales", "family": "Teratosphaeriaceae", "subfamily": ""}	20150924	ncbi	SAMN02981283	GCF_000338955.1	None	2013/02/08
beabas1	Beauveria	bassiana	ARSEF2860	{"clade": "sordariomyceta", "kingdom": "Fungi", "phylum": "Ascomycota", "subphylum": "Pezizomycotina", "class": "Sordariomycetes", "subclass": "Hypocreomycetidae", "order": "Hypocreales", "family": "Cordycipitaceae", "subfamily": ""}	0	jgi	411938	Beaba1	20210421	Xiao G et al.,2012
beabas2.1	Beauveria	bassiana	D15	{"clade": "sordariomyceta", "kingdom": "Fungi", "phylum": "Ascomycota", "subphylum": "Pezizomycotina", "class": "Sordariomycetes", "subclass": "Hypocreomycetidae", "order": "Hypocreales", "family": "Cordycipitaceae", "subfamily": ""}	2014-11-03 00:00:00	ncbi	beabas2	GCA_000770705.1	None	2014/11/03
beabro1	Beauveria	brongniartii	RCEF3172	{"clade": "sordariomyceta", "kingdom": "Fungi", "phylum": "Ascomycota", "subphylum": "Pezizomycotina", "class": "Sordariomycetes", "subclass": "Hypocreomycetidae", "order": "Hypocreales", "family": "Cordycipitaceae", "subfamily": ""}	0	jgi	733941	Corbr1	20210414	Shang Y et al.,2016
bifade1	Bifiguratus	adelaidae	AZ0501	{"clade": "Opisthokonta", "kingdom": "Fungi", "phylum": "Mucoromycota", "subphylum": "Mucoromycotina", "class": "Endogonomycetes", "order": "Endogonales", "family": "", "subfamily": ""}	0	jgi		Bifad1	20210414	Torres-Cruz TJ et al.,2017
bimnov1	Bimuria	novae-zelandiae	CBS10779	{"clade": "dothideomyceta", "kingdom": "Fungi", "phylum": "Ascomycota", "subphylum": "Pezizomycotina", "class": "Dothideomycetes", "subclass": "Pleosporomycetidae", "order": "Pleosporales", "suborder": "Massarineae", "family": "Didymosphaeriaceae", "subfamily": ""}	v1.0	jgi		Bimnz1	20210414	Haridas S et al.,2020
bipmay1.1	Bipolaris	maydis	ATCC48331	{"clade": "dothideomyceta", "kingdom": "Fungi", "phylum": "Ascomycota", "subphylum": "Pezizomycotina", "class": "Dothideomycetes", "subclass": "Pleosporomycetidae", "order": "Pleosporales", "suborder": "Pleosporineae", "family": "Pleosporaceae", "subfamily": ""}	20140801	ncbi	SAMN00113370	GCF_000354255.1	None	2013/04/06
bipory1	Bipolaris	oryzae	ATCC44560	{"clade": "dothideomyceta", "kingdom": "Fungi", "phylum": "Ascomycota", "subphylum": "Pezizomycotina", "class": "Dothideomycetes", "subclass": "Pleosporomycetidae", "order": "Pleosporales", "suborder": "Pleosporineae", "family": "Pleosporaceae", "subfamily": ""}	20140811	ncbi	SAMN02981450	GCF_000523455.1	20210414	2014/01/24
bipsor1.1	Bipolaris	sorokiniana	ND90Pr	{"clade": "dothideomyceta", "kingdom": "Fungi", "phylum": "Ascomycota", "subphylum": "Pezizomycotina", "class": "Dothideomycetes", "subclass": "Pleosporomycetidae", "order": "Pleosporales", "suborder": "Pleosporineae", "family": "Pleosporaceae", "subfamily": ""}	20140811	ncbi	SAMN02981285	GCF_000338995.1	None	2013/02/08
bipsor2	Bipolaris	sorokiniana		{"clade": "dothideomyceta", "kingdom": "Fungi", "phylum": "Ascomycota", "subphylum": "Pezizomycotina", "class": "Dothideomycetes", "subclass": "Pleosporomycetidae", "order": "Pleosporales", "suborder": "Pleosporineae", "family": "Pleosporaceae", "subfamily": ""}	20200716	ncbi	SAMN13164483	GCA_013416765.1	20210414	2020/07/16
bipzei1	Bipolaris	zeicola	26R13	{"clade": "dothideomyceta", "kingdom": "Fungi", "phylum": "Ascomycota", "subphylum": "Pezizomycotina", "class": "Dothideomycetes", "subclass": "Pleosporomycetidae", "order": "Pleosporales", "suborder": "Pleosporineae", "family": "Pleosporaceae", "subfamily": ""}	20140811	ncbi	SAMN02981449	GCF_000523435.1	20210414	2014/01/24
bismar1	Biscogniauxia	marginata	CBS124505	{"clade": "sordariomyceta", "kingdom": "Fungi", "phylum": "Ascomycota", "subphylum": "Pezizomycotina", "class": "Sordariomycetes", "subclass": "Xylariomycetidae", "order": "Xylariales", "family": "Xylariaceae", "subfamily": ""}	v1.0	jgi		Bisma1	20210414	Franco MEE et al.,2022
bismed1	Biscogniauxia	mediterranea	AZ0048	{"clade": "sordariomyceta", "kingdom": "Fungi", "phylum": "Ascomycota", "subphylum": "Pezizomycotina", "class": "Sordariomycetes", "subclass": "Xylariomycetidae", "order": "Xylariales", "family": "Xylariaceae", "subfamily": ""}	v1.0	jgi		Bisme1	20210414	Franco MEE et al.,2022
bismed2	Biscogniauxia	mediterranea	CBS129072	{"clade": "sordariomyceta", "kingdom": "Fungi", "phylum": "Ascomycota", "subphylum": "Pezizomycotina", "class": "Sordariomycetes", "subclass": "Xylariomycetidae", "order": "Xylariales", "family": "Xylariaceae", "subfamily": ""}	v1.0	jgi		Bismed1	20210414	Franco MEE et al.,2022
bissp.1	Biscogniauxia	sp.	FL1348	{"clade": "sordariomyceta", "kingdom": "Fungi", "phylum": "Ascomycota", "subphylum": "Pezizomycotina", "class": "Sordariomycetes", "subclass": "Xylariomycetidae", "order": "Xylariales", "family": "Xylariaceae", "subfamily": ""}	v1.0	jgi		Biscog1	20210414	Franco MEE et al.,2022
bjeadu1	Bjerkandera	adusta		{"clade": "Opisthokonta", "kingdom": "Fungi", "phylum": "Basidiomycota", "subphylum": "Agaricomycotina", "class": "Agaricomycetes", "order": "Polyporales", "family": "Phanerochaetaceae", "subfamily": ""}	v1.0	jgi		Bjead1_1	20210414	Binder M et al.,2013
blaar.1	Blastobotrys	(Arxula)	adeninivorans	{"clade": "saccharomyceta", "kingdom": "Fungi", "phylum": "Ascomycota", "subphylum": "Saccharomycotina", "class": "Saccharomycetes", "order": "Saccharomycetales", "family": "Trichomonascaceae", "subfamily": ""}	0	jgi		Arxad1	20210414	Kunze G et al.,2014
blader2	Blastomyces	dermatitidis	SLH14081	{"clade": "leotiomyceta", "kingdom": "Fungi", "phylum": "Ascomycota", "subphylum": "Pezizomycotina", "class": "Eurotiomycetes", "subclass": "Eurotiomycetidae", "order": "Onygenales", "family": "Ajellomycetaceae", "subfamily": ""}	0	jgi		Blade1	20210414	Muñoz JF et al.,2015
blader3	Blastomyces	dermatitidis	ER3	{"clade": "leotiomyceta", "kingdom": "Fungi", "phylum": "Ascomycota", "subphylum": "Pezizomycotina", "class": "Eurotiomycetes", "subclass": "Eurotiomycetidae", "order": "Onygenales", "family": "Ajellomycetaceae", "subfamily": ""}	0	jgi	3438	Blader1	20210421	Muñoz JF et al.,2015
blader4.1	Blastomyces	dermatitidis	ATCC18188	{"clade": "leotiomyceta", "kingdom": "Fungi", "phylum": "Ascomycota", "subphylum": "Pezizomycotina", "class": "Eurotiomycetes", "subclass": "Eurotiomycetidae", "order": "Onygenales", "family": "Ajellomycetaceae", "subfamily": ""}	2015-07-17 00:00:00	ncbi	blader4	GCA_000151595.1	None	2010/03/24
blader5.1	Blastomyces	dermatitidis	ATCC26199	{"clade": "leotiomyceta", "kingdom": "Fungi", "phylum": "Ascomycota", "subphylum": "Pezizomycotina", "class": "Eurotiomycetes", "subclass": "Eurotiomycetidae", "order": "Onygenales", "family": "Ajellomycetaceae", "subfamily": ""}	2014-08-11 00:00:00	ncbi	blader5	GCA_000166155.1	None	2010/11/05
blagil1.1	Blastomyces	gilchristii	SLH14081	{"clade": "leotiomyceta", "kingdom": "Fungi", "phylum": "Ascomycota", "subphylum": "Pezizomycotina", "class": "Eurotiomycetes", "subclass": "Eurotiomycetidae", "order": "Onygenales", "family": "Ajellomycetaceae", "subfamily": ""}	20160602	ncbi	SAMN02953742	GCF_000003855.2	None	2009/02/19
blapar1	Blastomyces	parvus		{"clade": "leotiomyceta", "kingdom": "Fungi", "phylum": "Ascomycota", "subphylum": "Pezizomycotina", "class": "Eurotiomycetes", "subclass": "Eurotiomycetidae", "order": "Onygenales", "family": "Ajellomycetaceae", "subfamily": ""}	20171017	ncbi	SAMN02854802	GCA_002572885.1	20210414	2017/10/17
blaper1	Blastomyces	percursus	EI222	{"clade": "leotiomyceta", "kingdom": "Fungi", "phylum": "Ascomycota", "subphylum": "Pezizomycotina", "class": "Eurotiomycetes", "subclass": "Eurotiomycetidae", "order": "Onygenales", "family": "Ajellomycetaceae", "subfamily": ""}	0	jgi		Blape1	20210414	Dukik K et al.,2017
blasil1.1	Blastomyces	silverae		{"clade": "leotiomyceta", "kingdom": "Fungi", "phylum": "Ascomycota", "subphylum": "Pezizomycotina", "class": "Eurotiomycetes", "subclass": "Eurotiomycetidae", "order": "Onygenales", "family": "Ajellomycetaceae", "subfamily": ""}	20150528	ncbi	SAMN03354191	GCA_001014755.1	None	2015/05/28
blazon1.1	Blastosporella	zonata		{"clade": "Opisthokonta", "kingdom": "Fungi", "phylum": "Basidiomycota", "subphylum": "Agaricomycotina", "class": "Agaricomycetes", "subclass": "Agaricomycetidae", "order": "Agaricales", "family": "Tricholomataceae", "subfamily": ""}	2021-06-11	ncbi	blazon1	GCA_018856295.1	None	2021/06/11
blugra3	Blumeria	graminis	fsphordeiDH14	{"clade": "sordariomyceta", "kingdom": "Fungi", "phylum": "Ascomycota", "subphylum": "Pezizomycotina", "class": "Leotiomycetes", "order": "Erysiphales", "family": "Erysiphaceae", "subfamily": ""}	0	jgi		Blugr2	20210414	Frantzeskakis L et al.,2018
blugra4	Blumeria	graminis	fsphordeiRace1	{"clade": "sordariomyceta", "kingdom": "Fungi", "phylum": "Ascomycota", "subphylum": "Pezizomycotina", "class": "Leotiomycetes", "order": "Erysiphales", "family": "Erysiphaceae", "subfamily": ""}	0	jgi		BlugrR1_1	20210414	Frantzeskakis L et al.,2018
blugra5	Blumeria	graminis	fsptritici96224	{"clade": "sordariomyceta", "kingdom": "Fungi", "phylum": "Ascomycota", "subphylum": "Pezizomycotina", "class": "Leotiomycetes", "order": "Erysiphales", "family": "Erysiphaceae", "subfamily": ""}	v3.16	jgi	39391	Blugra3_16	20210421	Müller MC et al.,2019
blugra6	Blumeria	graminis	fsptritici	{"clade": "sordariomyceta", "kingdom": "Fungi", "phylum": "Ascomycota", "subphylum": "Pezizomycotina", "class": "Leotiomycetes", "order": "Erysiphales", "family": "Erysiphaceae", "subfamily": ""}	2019-01-30 00:00:00	ncbi	blugra6	GCA_900519115.1	20210421	2019/01/30
blugra7.1	Blumeria	graminis	fsphordei	{"clade": "sordariomyceta", "kingdom": "Fungi", "phylum": "Ascomycota", "subphylum": "Pezizomycotina", "class": "Leotiomycetes", "order": "Erysiphales", "family": "Erysiphaceae", "subfamily": ""}	2018-09-14 00:00:00	ncbi	blugra7	GCA_900237765.1	None	2018/09/14
blugra8	Blumeria	graminis	fsptritici96224	{"clade": "sordariomyceta", "kingdom": "Fungi", "phylum": "Ascomycota", "subphylum": "Pezizomycotina", "class": "Leotiomycetes", "order": "Erysiphales", "family": "Erysiphaceae", "subfamily": ""}	0	jgi	39391	Blugra1	20210421	Wicker T et al.,2013
blugra9	Blumeria	graminis	fsptriticale	{"clade": "sordariomyceta", "kingdom": "Fungi", "phylum": "Ascomycota", "subphylum": "Pezizomycotina", "class": "Leotiomycetes", "order": "Erysiphales", "family": "Erysiphaceae", "subfamily": ""}	2021-06-14	ncbi	blugra9	GCA_905067625.1	20210914	2021/06/14
bluhor1	Blumeria	hordei	DH14	{"clade": "sordariomyceta", "kingdom": "Fungi", "phylum": "Ascomycota", "subphylum": "Pezizomycotina", "class": "Leotiomycetes", "order": "Erysiphales", "family": "Erysiphaceae", "subfamily": ""}	2015-01-30	ncbi	bluhor1	GCA_000151065.3	20210914	2013/04/18
boeexi1	Boeremia	exigua	MPISDFRAT0100	{"clade": "dothideomyceta", "kingdom": "Fungi", "phylum": "Ascomycota", "subphylum": "Pezizomycotina", "class": "Dothideomycetes", "subclass": "Pleosporomycetidae", "order": "Pleosporales", "suborder": "Pleosporineae", "family": "Didymellaceae", "subfamily": ""}	v1.0	jgi		Boeex1	20210414	Mesny F et al.,2021
boledu1	Boletus	edulis	Pilba	{"clade": "Opisthokonta", "kingdom": "Fungi", "phylum": "Basidiomycota", "subphylum": "Agaricomycotina", "class": "Agaricomycetes", "subclass": "Agaricomycetidae", "order": "Boletales", "suborder": "Boletineae", "family": "Boletaceae", "subfamily": "Boletoideae"}	v1.0	jgi		Boledp1	20210414	Miyauchi S et al.,2020
boledu2	Boletus	edulis	BED1	{"clade": "Opisthokonta", "kingdom": "Fungi", "phylum": "Basidiomycota", "subphylum": "Agaricomycotina", "class": "Agaricomycetes", "subclass": "Agaricomycetidae", "order": "Boletales", "suborder": "Boletineae", "family": "Boletaceae", "subfamily": "Boletoideae"}	v4.0	jgi		Boled5	20210414	Miyauchi S et al.,2020
bolret1.1	Boletus	reticuloceps		{"clade": "Opisthokonta", "kingdom": "Fungi", "phylum": "Basidiomycota", "subphylum": "Agaricomycotina", "class": "Agaricomycetes", "subclass": "Agaricomycetidae", "order": "Boletales", "suborder": "Boletineae", "family": "Boletaceae", "subfamily": "Boletoideae"}	2021-05-18	ncbi	bolret1	GCA_018397855.1	None	2021/05/18
bonmes1	Bondarzewia	mesenterica		{"clade": "Opisthokonta", "kingdom": "Fungi", "phylum": "Basidiomycota", "subphylum": "Agaricomycotina", "class": "Agaricomycetes", "order": "Russulales", "family": "Bondarzewiaceae", "subfamily": ""}	20190422	ncbi	SAMN10888637	GCA_004802705.1	20210414	2019/04/22
botacl1	Botrytis	aclada		{"clade": "sordariomyceta", "kingdom": "Fungi", "phylum": "Ascomycota", "subphylum": "Pezizomycotina", "class": "Leotiomycetes", "order": "Helotiales", "family": "Sclerotiniaceae", "subfamily": ""}	20201020	ncbi	SAMN10219759	GCA_014898285.1	20210414	2020/10/20
botbys1	Botrytis	byssoidea		{"clade": "sordariomyceta", "kingdom": "Fungi", "phylum": "Ascomycota", "subphylum": "Pezizomycotina", "class": "Leotiomycetes", "order": "Helotiales", "family": "Sclerotiniaceae", "subfamily": ""}	20201020	ncbi	SAMN10219760	GCF_014898295.1	20210414	2020/10/20
botcal1	Botryotinia	calthae		{"clade": "sordariomyceta", "kingdom": "Fungi", "phylum": "Ascomycota", "subphylum": "Pezizomycotina", "class": "Leotiomycetes", "order": "Helotiales", "family": "Sclerotiniaceae", "subfamily": ""}	20190326	ncbi	SAMN07604183	GCA_004379285.1	20210414	2019/03/26
botcin3	Botrytis	cinerea	T4	{"clade": "sordariomyceta", "kingdom": "Fungi", "phylum": "Ascomycota", "subphylum": "Pezizomycotina", "class": "Leotiomycetes", "order": "Helotiales", "family": "Sclerotiniaceae", "subfamily": ""}	0	jgi		Botcin1	20210421	Amselem J et al.,2011
botcin4	Botrytis	cinerea	B0510	{"clade": "sordariomyceta", "kingdom": "Fungi", "phylum": "Ascomycota", "subphylum": "Pezizomycotina", "class": "Leotiomycetes", "order": "Helotiales", "family": "Sclerotiniaceae", "subfamily": ""}	2018-04-17 00:00:00	ncbi	botcin4	GCF_000143535.2	20210421	2015/02/05
botcin5	Botrytis	cinerea	BcDW1	{"clade": "sordariomyceta", "kingdom": "Fungi", "phylum": "Ascomycota", "subphylum": "Pezizomycotina", "class": "Leotiomycetes", "order": "Helotiales", "family": "Sclerotiniaceae", "subfamily": ""}	2013-05-31 00:00:00	ncbi	botcin5	GCA_000349525.1	20210421	2013/03/28
botcon1	Botryotinia	convoluta		{"clade": "sordariomyceta", "kingdom": "Fungi", "phylum": "Ascomycota", "subphylum": "Pezizomycotina", "class": "Leotiomycetes", "order": "Helotiales", "family": "Sclerotiniaceae", "subfamily": ""}	20190412	ncbi	SAMN07604184	GCA_004786275.1	20210414	2019/04/12
botdew1	Botrytis	deweyae		{"clade": "sordariomyceta", "kingdom": "Fungi", "phylum": "Ascomycota", "subphylum": "Pezizomycotina", "class": "Leotiomycetes", "order": "Helotiales", "family": "Sclerotiniaceae", "subfamily": ""}	20201020	ncbi	SAMN10219761	GCF_014898535.1	20210414	2020/10/20
botdot1	Botryosphaeria	dothidea		{"clade": "dothideomyceta", "kingdom": "Fungi", "phylum": "Ascomycota", "subphylum": "Pezizomycotina", "class": "Dothideomycetes", "order": "Botryosphaeriales", "family": "Botryosphaeriaceae", "subfamily": ""}	0	jgi		Botdo1_1	20210414	Marsberg A et al.,2017
botell1	Botrytis	elliptica		{"clade": "sordariomyceta", "kingdom": "Fungi", "phylum": "Ascomycota", "subphylum": "Pezizomycotina", "class": "Leotiomycetes", "order": "Helotiales", "family": "Sclerotiniaceae", "subfamily": ""}	20201020	ncbi	SAMN10219762	GCA_014898555.1	20210414	2020/10/20
botell2	Botrytis	elliptica		{"clade": "sordariomyceta", "kingdom": "Fungi", "phylum": "Ascomycota", "subphylum": "Pezizomycotina", "class": "Leotiomycetes", "order": "Helotiales", "family": "Sclerotiniaceae", "subfamily": ""}	20190412	ncbi	SAMN07604185	GCA_004786205.1	20210414	2019/04/12
botfra1	Botrytis	fragariae		{"clade": "sordariomyceta", "kingdom": "Fungi", "phylum": "Ascomycota", "subphylum": "Pezizomycotina", "class": "Leotiomycetes", "order": "Helotiales", "family": "Sclerotiniaceae", "subfamily": ""}	20200722	ncbi	SAMN14689424	GCF_013461495.1	20210414	2020/07/22
botgal1	Botrytis	galanthina		{"clade": "sordariomyceta", "kingdom": "Fungi", "phylum": "Ascomycota", "subphylum": "Pezizomycotina", "class": "Leotiomycetes", "order": "Helotiales", "family": "Sclerotiniaceae", "subfamily": ""}	20190425	ncbi	SAMN07604186	GCA_004916875.1	20210414	2019/04/25
botglo1	Botryotinia	globosa		{"clade": "sordariomyceta", "kingdom": "Fungi", "phylum": "Ascomycota", "subphylum": "Pezizomycotina", "class": "Leotiomycetes", "order": "Helotiales", "family": "Sclerotiniaceae", "subfamily": ""}	20201020	ncbi	SAMN10219763	GCA_014898425.1	20210414	2020/10/20
bothya1	Botrytis	hyacinthi		{"clade": "sordariomyceta", "kingdom": "Fungi", "phylum": "Ascomycota", "subphylum": "Pezizomycotina", "class": "Leotiomycetes", "order": "Helotiales", "family": "Sclerotiniaceae", "subfamily": ""}	20190412	ncbi	SAMN07604187	GCA_004786245.1	20210414	2019/04/12
botnar1	Botryotinia	narcissicola		{"clade": "sordariomyceta", "kingdom": "Fungi", "phylum": "Ascomycota", "subphylum": "Pezizomycotina", "class": "Leotiomycetes", "order": "Helotiales", "family": "Sclerotiniaceae", "subfamily": ""}	20190412	ncbi	SAMN07604188	GCA_004786225.1	20210414	2019/04/12
botpae1	Botrytis	paeoniae		{"clade": "sordariomyceta", "kingdom": "Fungi", "phylum": "Ascomycota", "subphylum": "Pezizomycotina", "class": "Leotiomycetes", "order": "Helotiales", "family": "Sclerotiniaceae", "subfamily": ""}	20190412	ncbi	SAMN07604189	GCA_004786145.1	20210414	2019/04/12
botpor1	Botrytis	porri		{"clade": "sordariomyceta", "kingdom": "Fungi", "phylum": "Ascomycota", "subphylum": "Pezizomycotina", "class": "Leotiomycetes", "order": "Helotiales", "family": "Sclerotiniaceae", "subfamily": ""}	20201020	ncbi	SAMN10219764	GCF_014898465.1	20210414	2020/10/20
botpor2	Botrytis	porri		{"clade": "sordariomyceta", "kingdom": "Fungi", "phylum": "Ascomycota", "subphylum": "Pezizomycotina", "class": "Leotiomycetes", "order": "Helotiales", "family": "Sclerotiniaceae", "subfamily": ""}	20190412	ncbi	SAMN07604190	GCA_004786265.1	20210414	2019/04/12
botsin1	Botrytis	sinoallii		{"clade": "sordariomyceta", "kingdom": "Fungi", "phylum": "Ascomycota", "subphylum": "Pezizomycotina", "class": "Leotiomycetes", "order": "Helotiales", "family": "Sclerotiniaceae", "subfamily": ""}	20201020	ncbi	SAMN10219765	GCF_014898435.1	20210414	2020/10/20
botsqu1	Botryotinia	squamosa		{"clade": "sordariomyceta", "kingdom": "Fungi", "phylum": "Ascomycota", "subphylum": "Pezizomycotina", "class": "Leotiomycetes", "order": "Helotiales", "family": "Sclerotiniaceae", "subfamily": ""}	20201020	ncbi	SAMN10219766	GCA_014898485.1	20210414	2020/10/20
bottul1	Botrytis	tulipae		{"clade": "sordariomyceta", "kingdom": "Fungi", "phylum": "Ascomycota", "subphylum": "Pezizomycotina", "class": "Leotiomycetes", "order": "Helotiales", "family": "Sclerotiniaceae", "subfamily": ""}	20190412	ncbi	SAMN07604191	GCA_004786125.1	20210414	2019/04/12
brebru2	Brettanomyces	bruxellensis		{"clade": "saccharomyceta", "kingdom": "Fungi", "phylum": "Ascomycota", "subphylum": "Saccharomycotina", "class": "Saccharomycetes", "order": "Saccharomycetales", "family": "Pichiaceae", "subfamily": ""}	20200226	ncbi	SAMEA5744194	GCA_902155815.1	20210414	2020/02/26
brebru3.1	Brettanomyces	bruxellensis		{"clade": "saccharomyceta", "kingdom": "Fungi", "phylum": "Ascomycota", "subphylum": "Saccharomycotina", "class": "Saccharomycetes", "order": "Saccharomycetales", "family": "Pichiaceae", "subfamily": ""}	20200803	ncbi	SAMN14513465	GCA_014176185.1	None	2020/08/03
brebru5	Brettanomyces	bruxellensis	AWRI1499	{"clade": "saccharomyceta", "kingdom": "Fungi", "phylum": "Ascomycota", "subphylum": "Saccharomycotina", "class": "Saccharomycetes", "order": "Saccharomycetales", "family": "Pichiaceae", "subfamily": ""}	20140804	ncbi	SAMN02261473	GCA_019923895.1	20210414	2012/04/27
brebru6	Brettanomyces	bruxellensis		{"clade": "saccharomyceta", "kingdom": "Fungi", "phylum": "Ascomycota", "subphylum": "Saccharomycotina", "class": "Saccharomycetes", "order": "Saccharomycetales", "family": "Pichiaceae", "subfamily": ""}	20180730	ncbi	SAMEA104365571	GCA_900496985.2	20210414	2018/07/30
brebru9.1	Brettanomyces	bruxellensis		{"clade": "saccharomyceta", "kingdom": "Fungi", "phylum": "Ascomycota", "subphylum": "Saccharomycotina", "class": "Saccharomycetes", "order": "Saccharomycetales", "family": "Pichiaceae", "subfamily": ""}	2021-09-16	ncbi	brebru9	GCF_011074885.1	None	2020/10/21
brenaa1	Brettanomyces	naardenensis		{"clade": "saccharomyceta", "kingdom": "Fungi", "phylum": "Ascomycota", "subphylum": "Saccharomycotina", "class": "Saccharomycetes", "order": "Saccharomycetales", "family": "Pichiaceae", "subfamily": ""}	20190130	ncbi	SAMEA5150282	GCA_900660285.1	20210414	2019/01/30
brenan1.1	Brettanomyces	nanus		{"clade": "saccharomyceta", "kingdom": "Fungi", "phylum": "Ascomycota", "subphylum": "Saccharomycotina", "class": "Saccharomycetes", "order": "Saccharomycetales", "family": "Pichiaceae", "subfamily": ""}	20210213	ncbi	SAMN12257692	GCF_011074865.1	None	2020/11/16
butros1.1	Butyriboletus	roseoflavus		{"clade": "Opisthokonta", "kingdom": "Fungi", "phylum": "Basidiomycota", "subphylum": "Agaricomycotina", "class": "Agaricomycetes", "subclass": "Agaricomycetidae", "order": "Boletales", "suborder": "Boletineae", "family": "Boletaceae", "subfamily": "Boletoideae"}	2021-07-27	ncbi	butros1	GCA_019364595.1	None	2021/07/27
byscir1	Byssothecium	circinans	CBS67592	{"clade": "dothideomyceta", "kingdom": "Fungi", "phylum": "Ascomycota", "subphylum": "Pezizomycotina", "class": "Dothideomycetes", "subclass": "Pleosporomycetidae", "order": "Pleosporales", "suborder": "Massarineae", "family": "Massarinaceae", "subfamily": ""}	v1.0	jgi		Bysci1	20210414	Haridas S et al.,2020
bysspe1	Byssochlamys	spectabilis	No5	{"clade": "leotiomyceta", "kingdom": "Fungi", "phylum": "Ascomycota", "subphylum": "Pezizomycotina", "class": "Eurotiomycetes", "subclass": "Eurotiomycetidae", "order": "Eurotiales", "family": "Thermoascaceae", "subfamily": ""}	0	jgi		Byssp1	20210414	Oka T et al.,2014
cadmal1.1	Cadophora	malorum		{"clade": "sordariomyceta", "kingdom": "Fungi", "phylum": "Ascomycota", "subphylum": "Pezizomycotina", "class": "Leotiomycetes", "order": "Helotiales", "family": "", "subfamily": ""}	20210316	ncbi	SAMN16243192	GCA_017365405.1	None	2021/03/16
cadsp.1	Cadophora	sp.	DSE1049	{"clade": "sordariomyceta", "kingdom": "Fungi", "phylum": "Ascomycota", "subphylum": "Pezizomycotina", "class": "Leotiomycetes", "order": "Helotiales", "family": "", "subfamily": ""}	v1.0	jgi		Cadsp1	20210421	Knapp DG et al.,2018
cadsp.2	Cadophora	sp.	M221	{"clade": "sordariomyceta", "kingdom": "Fungi", "phylum": "Ascomycota", "subphylum": "Pezizomycotina", "class": "Leotiomycetes", "order": "Helotiales", "family": "", "subfamily": ""}	2021-03-16 00:00:00	ncbi	cadsp.2	GCA_017366145.1	20210421	2021/03/16
caechu1	Caecomyces	churrovis	A	{"clade": "Opisthokonta", "kingdom": "Fungi", "phylum": "Chytridiomycota", "class": "Neocallimastigomycetes", "order": "Neocallimastigales", "family": "Neocallimastigaceae", "subphylum": "", "subfamily": ""}	v1.0	jgi		Caecom1	20210414	Brown JL et al.,2021
calmar1	Calycina	marina	TRa3180A	{"clade": "sordariomyceta", "kingdom": "Fungi", "phylum": "Ascomycota", "subphylum": "Pezizomycotina", "class": "Leotiomycetes", "order": "Helotiales", "family": "Pezizellaceae", "subfamily": ""}	v1.0	jgi		Calmar1	20210414	Hagestad OC et al.,2021
camtin1	Camillea	tinctor	CBS20356	{"clade": "sordariomyceta", "kingdom": "Fungi", "phylum": "Ascomycota", "subphylum": "Pezizomycotina", "class": "Sordariomycetes", "subclass": "Xylariomycetidae", "order": "Xylariales", "family": "Xylariaceae", "subfamily": ""}	v1.0	jgi		CtCBS203_1	20210414	Franco MEE et al.,2022
canalb10.1	Candida	albicans	P75063	{"clade": "Candida/Lodderomyces clade", "kingdom": "Fungi", "phylum": "Ascomycota", "subphylum": "Saccharomycotina", "class": "Saccharomycetes", "order": "Saccharomycetales", "family": "Debaryomycetaceae", "subfamily": ""}	20141117	ncbi	SAMN01048014	GCA_000775525.1	None	2014/11/10
canalb11.1	Candida	albicans	P57072	{"clade": "Candida/Lodderomyces clade", "kingdom": "Fungi", "phylum": "Ascomycota", "subphylum": "Saccharomycotina", "class": "Saccharomycetes", "order": "Saccharomycetales", "family": "Debaryomycetaceae", "subfamily": ""}	20141105	ncbi	SAMN00767978	GCA_000773805.1	None	2014/11/05
canalb12.1	Candida	albicans	12C	{"clade": "Candida/Lodderomyces clade", "kingdom": "Fungi", "phylum": "Ascomycota", "subphylum": "Saccharomycotina", "class": "Saccharomycetes", "order": "Saccharomycetales", "family": "Debaryomycetaceae", "subfamily": ""}	20141110	ncbi	SAMN00767974	GCA_000773845.1	None	2014/11/10
canalb13.1	Candida	albicans	P94015	{"clade": "Candida/Lodderomyces clade", "kingdom": "Fungi", "phylum": "Ascomycota", "subphylum": "Saccharomycotina", "class": "Saccharomycetes", "order": "Saccharomycetales", "family": "Debaryomycetaceae", "subfamily": ""}	20141117	ncbi	SAMN01048005	GCA_000773755.1	None	2014/11/05
canalb14.1	Candida	albicans	19F	{"clade": "Candida/Lodderomyces clade", "kingdom": "Fungi", "phylum": "Ascomycota", "subphylum": "Saccharomycotina", "class": "Saccharomycetes", "order": "Saccharomycetales", "family": "Debaryomycetaceae", "subfamily": ""}	20141117	ncbi	SAMN01048008	GCA_000775445.1	None	2014/11/10
canalb15.1	Candida	albicans	P60002	{"clade": "Candida/Lodderomyces clade", "kingdom": "Fungi", "phylum": "Ascomycota", "subphylum": "Saccharomycotina", "class": "Saccharomycetes", "order": "Saccharomycetales", "family": "Debaryomycetaceae", "subfamily": ""}	20141117	ncbi	SAMN01048007	GCA_000784525.1	None	2014/11/17
canalb16.1	Candida	albicans	Ca6	{"clade": "Candida/Lodderomyces clade", "kingdom": "Fungi", "phylum": "Ascomycota", "subphylum": "Saccharomycotina", "class": "Saccharomycetes", "order": "Saccharomycetales", "family": "Debaryomycetaceae", "subfamily": ""}	20141117	ncbi	SAMN03164130	GCA_000784695.1	None	2014/11/17
canalb17.1	Candida	albicans	P37037	{"clade": "Candida/Lodderomyces clade", "kingdom": "Fungi", "phylum": "Ascomycota", "subphylum": "Saccharomycotina", "class": "Saccharomycetes", "order": "Saccharomycetales", "family": "Debaryomycetaceae", "subfamily": ""}	20141117	ncbi	SAMN01048011	GCA_000773825.1	None	2014/11/05
canalb18.1	Candida	albicans	P76067	{"clade": "Candida/Lodderomyces clade", "kingdom": "Fungi", "phylum": "Ascomycota", "subphylum": "Saccharomycotina", "class": "Saccharomycetes", "order": "Saccharomycetales", "family": "Debaryomycetaceae", "subfamily": ""}	20141117	ncbi	SAMN01048017	GCA_000784495.1	None	2014/11/17
canalb19.1	Candida	albicans	P75010	{"clade": "Candida/Lodderomyces clade", "kingdom": "Fungi", "phylum": "Ascomycota", "subphylum": "Saccharomycotina", "class": "Saccharomycetes", "order": "Saccharomycetales", "family": "Debaryomycetaceae", "subfamily": ""}	20141117	ncbi	SAMN00769059	GCA_000784575.1	None	2014/11/17
canalb2.1	Candida	albicans	WO1	{"clade": "Candida/Lodderomyces clade", "kingdom": "Fungi", "phylum": "Ascomycota", "subphylum": "Saccharomycotina", "class": "Saccharomycetes", "order": "Saccharomycetales", "family": "Debaryomycetaceae", "subfamily": ""}	20140806	ncbi	SAMN02953609	GCA_000149445.2	None	2006/03/28
canalb20.1	Candida	albicans	P37005	{"clade": "Candida/Lodderomyces clade", "kingdom": "Fungi", "phylum": "Ascomycota", "subphylum": "Saccharomycotina", "class": "Saccharomycetes", "order": "Saccharomycetales", "family": "Debaryomycetaceae", "subfamily": ""}	20141117	ncbi	SAMN01048006	GCA_000773745.1	None	2014/11/05
canalb21.1	Candida	albicans	P78042	{"clade": "Candida/Lodderomyces clade", "kingdom": "Fungi", "phylum": "Ascomycota", "subphylum": "Saccharomycotina", "class": "Saccharomycetes", "order": "Saccharomycetales", "family": "Debaryomycetaceae", "subfamily": ""}	20141117	ncbi	SAMN01048015	GCA_000784615.1	None	2014/11/17
canalb22.1	Candida	albicans	GC75	{"clade": "Candida/Lodderomyces clade", "kingdom": "Fungi", "phylum": "Ascomycota", "subphylum": "Saccharomycotina", "class": "Saccharomycetes", "order": "Saccharomycetales", "family": "Debaryomycetaceae", "subfamily": ""}	20141105	ncbi	SAMN00767984	GCA_000773735.1	None	2014/11/05
canalb23.1	Candida	albicans	P78048	{"clade": "Candida/Lodderomyces clade", "kingdom": "Fungi", "phylum": "Ascomycota", "subphylum": "Saccharomycotina", "class": "Saccharomycetes", "order": "Saccharomycetales", "family": "Debaryomycetaceae", "subfamily": ""}	20141117	ncbi	SAMN01048009	GCA_000773725.1	None	2014/11/05
canalb24.1	Candida	albicans	P57055	{"clade": "Candida/Lodderomyces clade", "kingdom": "Fungi", "phylum": "Ascomycota", "subphylum": "Saccharomycotina", "class": "Saccharomycetes", "order": "Saccharomycetales", "family": "Debaryomycetaceae", "subfamily": ""}	20141117	ncbi	SAMN01048013	GCA_000775505.1	None	2014/11/10
canalb25.1	Candida	albicans	P34048	{"clade": "Candida/Lodderomyces clade", "kingdom": "Fungi", "phylum": "Ascomycota", "subphylum": "Saccharomycotina", "class": "Saccharomycetes", "order": "Saccharomycetales", "family": "Debaryomycetaceae", "subfamily": ""}	20141117	ncbi	SAMN01048010	GCA_000775465.1	None	2014/11/10
canalb26.1	Candida	albicans	P75016	{"clade": "Candida/Lodderomyces clade", "kingdom": "Fungi", "phylum": "Ascomycota", "subphylum": "Saccharomycotina", "class": "Saccharomycetes", "order": "Saccharomycetales", "family": "Debaryomycetaceae", "subfamily": ""}	20141117	ncbi	SAMN01048012	GCA_000784595.1	None	2014/11/17
canalb27	Candida	albicans	Ca529L	{"clade": "saccharomyceta", "kingdom": "Fungi", "phylum": "Ascomycota", "subphylum": "Saccharomycotina", "class": "Saccharomycetes", "order": "Saccharomycetales", "family": "", "subfamily": ""}	20181019	ncbi	SAMN02058435	GCA_000691765.2	20210414	2014/05/15
canalb28.1	Candida	albicans	SC5314	{"clade": "Candida/Lodderomyces clade", "kingdom": "Fungi", "phylum": "Ascomycota", "subphylum": "Saccharomycotina", "class": "Saccharomycetes", "order": "Saccharomycetales", "family": "Debaryomycetaceae", "subfamily": ""}	2018-04-04	ncbi	canalb28	GCF_000182965.3	None	2016/10/12
canalb3.1	Candida	albicans		{"clade": "Candida/Lodderomyces clade", "kingdom": "Fungi", "phylum": "Ascomycota", "subphylum": "Saccharomycotina", "class": "Saccharomycetes", "order": "Saccharomycetales", "family": "Debaryomycetaceae", "subfamily": ""}	20200803	ncbi	SAMN11056371	GCA_014049485.1	None	2020/08/03
canalb4.1	Candida	albicans	P87	{"clade": "Candida/Lodderomyces clade", "kingdom": "Fungi", "phylum": "Ascomycota", "subphylum": "Saccharomycotina", "class": "Saccharomycetes", "order": "Saccharomycetales", "family": "Debaryomycetaceae", "subfamily": ""}	20141110	ncbi	SAMN00767982	GCA_000774085.1	None	2014/11/10
canalb5.1	Candida	albicans	SC5314	{"clade": "Candida/Lodderomyces clade", "kingdom": "Fungi", "phylum": "Ascomycota", "subphylum": "Saccharomycotina", "class": "Saccharomycetes", "order": "Saccharomycetales", "family": "Debaryomycetaceae", "subfamily": ""}	20141117	ncbi	SAMN01041717	GCA_000784655.1	None	2014/11/17
canalb7.1	Candida	albicans	L26	{"clade": "Candida/Lodderomyces clade", "kingdom": "Fungi", "phylum": "Ascomycota", "subphylum": "Saccharomycotina", "class": "Saccharomycetes", "order": "Saccharomycetales", "family": "Debaryomycetaceae", "subfamily": ""}	20141117	ncbi	SAMN01048004	GCA_000775455.1	None	2014/11/10
canalb8.1	Candida	albicans	P37039	{"clade": "Candida/Lodderomyces clade", "kingdom": "Fungi", "phylum": "Ascomycota", "subphylum": "Saccharomycotina", "class": "Saccharomycetes", "order": "Saccharomycetales", "family": "Debaryomycetaceae", "subfamily": ""}	20141117	ncbi	SAMN00767975	GCA_000784515.1	None	2014/11/17
canalb9.1	Candida	albicans	P76055	{"clade": "Candida/Lodderomyces clade", "kingdom": "Fungi", "phylum": "Ascomycota", "subphylum": "Saccharomycotina", "class": "Saccharomycetes", "order": "Saccharomycetales", "family": "Debaryomycetaceae", "subfamily": ""}	20141117	ncbi	SAMN01048016	GCA_000784505.1	None	2014/11/17
cananz1	Cantharellus	anzutake	C23	{"clade": "Opisthokonta", "kingdom": "Fungi", "phylum": "Basidiomycota", "subphylum": "Agaricomycotina", "class": "Agaricomycetes", "order": "Cantharellales", "family": "Cantharellaceae", "subfamily": ""}	v1.0	jgi		Cananz1	20210414	Miyauchi S et al.,2020
canara1	Candida	arabinofermentans	NRRLYB2248	{"clade": "saccharomyceta", "kingdom": "Fungi", "phylum": "Ascomycota", "subphylum": "Saccharomycotina", "class": "Saccharomycetes", "order": "Saccharomycetales", "family": "", "subfamily": ""}	v1.0	jgi		Canar1	20210414	Riley R et al.,2016
canaur1.1	Candida	auris		{"clade": "Candida/Lodderomyces clade", "kingdom": "Fungi", "phylum": "Ascomycota", "subphylum": "Saccharomycotina", "class": "Saccharomycetes", "order": "Saccharomycetales", "family": "Debaryomycetaceae", "subfamily": ""}	20190812	ncbi	SAMN05379609	GCF_002775015.1	None	2017/11/15
canaur2.1	Candida	auris		{"clade": "Candida/Lodderomyces clade", "kingdom": "Fungi", "phylum": "Ascomycota", "subphylum": "Saccharomycotina", "class": "Saccharomycetes", "order": "Saccharomycetales", "family": "Debaryomycetaceae", "subfamily": ""}	20190910	ncbi	SAMN05379608	GCA_003013715.2	None	2019/09/04
canaur3.1	Candida	auris		{"clade": "Candida/Lodderomyces clade", "kingdom": "Fungi", "phylum": "Ascomycota", "subphylum": "Saccharomycotina", "class": "Saccharomycetes", "order": "Saccharomycetales", "family": "Debaryomycetaceae", "subfamily": ""}	20210205	ncbi	SAMN11570381	GCA_016809505.1	None	2021/02/05
canaur4.1	Candida	auris		{"clade": "Candida/Lodderomyces clade", "kingdom": "Fungi", "phylum": "Ascomycota", "subphylum": "Saccharomycotina", "class": "Saccharomycetes", "order": "Saccharomycetales", "family": "Debaryomycetaceae", "subfamily": ""}	20190905	ncbi	SAMN05379621	GCA_008275145.1	None	2019/09/05
canaur5.1	Candida	auris		{"clade": "Candida/Lodderomyces clade", "kingdom": "Fungi", "phylum": "Ascomycota", "subphylum": "Saccharomycotina", "class": "Saccharomycetes", "order": "Saccharomycetales", "family": "Debaryomycetaceae", "subfamily": ""}	20191011	ncbi	SAMD00117055	GCA_007168705.1	None	2019/07/10
canaur6.1	Candida	auris		{"clade": "Candida/Lodderomyces clade", "kingdom": "Fungi", "phylum": "Ascomycota", "subphylum": "Saccharomycotina", "class": "Saccharomycetes", "order": "Saccharomycetales", "family": "Debaryomycetaceae", "subfamily": ""}	20190812	ncbi	SAMN05379624	GCA_002759435.2	None	2017/11/07
canaur7.1	Candida	auris		{"clade": "Candida/Lodderomyces clade", "kingdom": "Fungi", "phylum": "Ascomycota", "subphylum": "Saccharomycotina", "class": "Saccharomycetes", "order": "Saccharomycetales", "family": "Debaryomycetaceae", "subfamily": ""}	20190812	ncbi	SAMN05379619	GCA_003014415.1	None	2018/03/23
canboi1	Candida	boidinii	NRRLY2332	{"clade": "saccharomyceta", "kingdom": "Fungi", "phylum": "Ascomycota", "subphylum": "Saccharomycotina", "class": "Saccharomycetes", "order": "Saccharomycetales", "family": "", "subfamily": ""}	0	jgi		Canbo1	20210414	Krassowski T et al.,2018
cancal1.1	Candida	californica		{"clade": "Candida/Lodderomyces clade", "kingdom": "Fungi", "phylum": "Ascomycota", "subphylum": "Saccharomycotina", "class": "Saccharomycetes", "order": "Saccharomycetales", "family": "Debaryomycetaceae", "subfamily": ""}	20210108	ncbi	SAMN08581127	GCA_016584195.1	None	2021/01/08
cancal2.1	Candida	californica		{"clade": "Candida/Lodderomyces clade", "kingdom": "Fungi", "phylum": "Ascomycota", "subphylum": "Saccharomycotina", "class": "Saccharomycetes", "order": "Saccharomycetales", "family": "Debaryomycetaceae", "subfamily": ""}	20210108	ncbi	SAMN08581125	GCA_016584265.1	None	2021/01/08
candub1	Candida	dubliniensis	CD36	{"clade": "saccharomyceta", "kingdom": "Fungi", "phylum": "Ascomycota", "subphylum": "Saccharomycotina", "class": "Saccharomycetes", "order": "Saccharomycetales", "family": "", "subfamily": ""}	0	jgi	101528	Candu1	20210414	Jackson AP et al.,2009
canduo1.1	Candida	duobushaemulonis		{"clade": "Candida/Lodderomyces clade", "kingdom": "Fungi", "phylum": "Ascomycota", "subphylum": "Saccharomycotina", "class": "Saccharomycetes", "order": "Saccharomycetales", "family": "Debaryomycetaceae", "subfamily": ""}	20190909	ncbi	SAMN08161465	GCF_002926085.2	None	2018/02/13
cangla1.1	Candida	glabrata		{"clade": "Candida/Lodderomyces clade", "kingdom": "Fungi", "phylum": "Ascomycota", "subphylum": "Saccharomycotina", "class": "Saccharomycetes", "order": "Saccharomycetales", "family": "Debaryomycetaceae", "subfamily": ""}	20170925	ncbi	SAMEA3138172	GCF_000002545.3	None	2004/06/30
cangla10.1	Candida	glabrata		{"clade": "Candida/Lodderomyces clade", "kingdom": "Fungi", "phylum": "Ascomycota", "subphylum": "Saccharomycotina", "class": "Saccharomycetes", "order": "Saccharomycetales", "family": "Debaryomycetaceae", "subfamily": ""}	20160210	ncbi	SAMN04121077	GCA_001466685.1	None	2015/12/15
cangla11.1	Candida	glabrata		{"clade": "Candida/Lodderomyces clade", "kingdom": "Fungi", "phylum": "Ascomycota", "subphylum": "Saccharomycotina", "class": "Saccharomycetes", "order": "Saccharomycetales", "family": "Debaryomycetaceae", "subfamily": ""}	20171025	ncbi	SAMEA4436741	GCA_900096545.1	None	2017/10/25
cangla12.1	Candida	glabrata		{"clade": "Candida/Lodderomyces clade", "kingdom": "Fungi", "phylum": "Ascomycota", "subphylum": "Saccharomycotina", "class": "Saccharomycetes", "order": "Saccharomycetales", "family": "Debaryomycetaceae", "subfamily": ""}	20171025	ncbi	SAMEA91282918	GCA_900166875.1	None	2017/10/25
cangla13	Candida	glabrata		{"clade": "saccharomyceta", "kingdom": "Fungi", "phylum": "Ascomycota", "subphylum": "Saccharomycotina", "class": "Saccharomycetes", "order": "Saccharomycetales", "family": "", "subfamily": ""}	20160209	ncbi	SAMN04121075	GCA_001466635.1	20210414	2015/12/15
cangla2.1	Candida	glabrata		{"clade": "Candida/Lodderomyces clade", "kingdom": "Fungi", "phylum": "Ascomycota", "subphylum": "Saccharomycotina", "class": "Saccharomycetes", "order": "Saccharomycetales", "family": "Debaryomycetaceae", "subfamily": ""}	20200817	ncbi	SAMN13836662	GCA_014217725.1	None	2020/08/17
cangla3.1	Candida	glabrata		{"clade": "Candida/Lodderomyces clade", "kingdom": "Fungi", "phylum": "Ascomycota", "subphylum": "Saccharomycotina", "class": "Saccharomycetes", "order": "Saccharomycetales", "family": "Debaryomycetaceae", "subfamily": ""}	20200707	ncbi	SAMN13613350	GCA_010111755.1	None	2020/02/03
cangla4.1	Candida	glabrata		{"clade": "Candida/Lodderomyces clade", "kingdom": "Fungi", "phylum": "Ascomycota", "subphylum": "Saccharomycotina", "class": "Saccharomycetes", "order": "Saccharomycetales", "family": "Debaryomycetaceae", "subfamily": ""}	20170714	ncbi	SAMN06328411	GCA_002219185.1	None	2017/07/13
cangla5.1	Candida	glabrata		{"clade": "Candida/Lodderomyces clade", "kingdom": "Fungi", "phylum": "Ascomycota", "subphylum": "Saccharomycotina", "class": "Saccharomycetes", "order": "Saccharomycetales", "family": "Debaryomycetaceae", "subfamily": ""}	20170714	ncbi	SAMN06328412	GCA_002219195.1	None	2017/07/13
cangla6	Candida	glabrata		{"clade": "saccharomyceta", "kingdom": "Fungi", "phylum": "Ascomycota", "subphylum": "Saccharomycotina", "class": "Saccharomycetes", "order": "Saccharomycetales", "family": "", "subfamily": ""}	20160209	ncbi	SAMN04121076	GCA_001466575.1	20210414	2015/12/15
cangla7.1	Candida	glabrata		{"clade": "Candida/Lodderomyces clade", "kingdom": "Fungi", "phylum": "Ascomycota", "subphylum": "Saccharomycotina", "class": "Saccharomycetes", "order": "Saccharomycetales", "family": "Debaryomycetaceae", "subfamily": ""}	20160209	ncbi	SAMN04121073	GCA_001466525.1	None	2015/12/15
cangla8	Candida	glabrata		{"clade": "saccharomyceta", "kingdom": "Fungi", "phylum": "Ascomycota", "subphylum": "Saccharomycotina", "class": "Saccharomycetes", "order": "Saccharomycetales", "family": "", "subfamily": ""}	20160209	ncbi	SAMN04121074	GCA_001466535.1	20210414	2015/12/15
cangla9.1	Candida	glabrata		{"clade": "Candida/Lodderomyces clade", "kingdom": "Fungi", "phylum": "Ascomycota", "subphylum": "Saccharomycotina", "class": "Saccharomycetes", "order": "Saccharomycetales", "family": "Debaryomycetaceae", "subfamily": ""}	20160209	ncbi	SAMN04121078	GCA_001466565.1	None	2015/12/15
canhae1.1	Candida	haemuloni		{"clade": "Candida/Lodderomyces clade", "kingdom": "Fungi", "phylum": "Ascomycota", "subphylum": "Saccharomycotina", "class": "Saccharomycetes", "order": "Saccharomycetales", "family": "Debaryomycetaceae", "subfamily": ""}	20190909	ncbi	SAMN08161437	GCF_002926055.2	None	2018/02/13
canhae2	Candida	haemuloni	varvulneris	{"clade": "saccharomyceta", "kingdom": "Fungi", "phylum": "Ascomycota", "subphylum": "Saccharomycotina", "class": "Saccharomycetes", "order": "Saccharomycetales", "family": "", "subfamily": ""}	20200408	ncbi	SAMN12529702	GCA_012184645.1	20210414	2020/04/08
canhae3	Candida	haemuloni	varvulneris	{"clade": "saccharomyceta", "kingdom": "Fungi", "phylum": "Ascomycota", "subphylum": "Saccharomycotina", "class": "Saccharomycetes", "order": "Saccharomycetales", "family": "", "subfamily": ""}	20200408	ncbi	SAMN12529703	GCA_012184655.1	20210414	2020/04/08
caninc1	Candida	inconspicua		{"clade": "saccharomyceta", "kingdom": "Fungi", "phylum": "Ascomycota", "subphylum": "Saccharomycotina", "class": "Saccharomycetes", "order": "Saccharomycetales", "family": "", "subfamily": ""}	20190429	ncbi	SAMN10845833	GCA_004931855.1	20210414	2019/04/29
canint1	Candida	intermedia		{"clade": "saccharomyceta", "kingdom": "Fungi", "phylum": "Ascomycota", "subphylum": "Saccharomycotina", "class": "Saccharomycetes", "order": "Saccharomycetales", "family": "", "subfamily": ""}	20161125	ncbi	SAMEA4029010	GCA_900106115.1	20210414	2016/11/25
canint2	Candida	intermedia		{"clade": "saccharomyceta", "kingdom": "Fungi", "phylum": "Ascomycota", "subphylum": "Saccharomycotina", "class": "Saccharomycetes", "order": "Saccharomycetales", "family": "", "subfamily": ""}	20161125	ncbi	SAMEA4029009	GCA_900106125.1	20210414	2016/11/25
canmal1	Candida	maltosa	Xu316	{"clade": "saccharomyceta", "kingdom": "Fungi", "phylum": "Ascomycota", "subphylum": "Saccharomycotina", "class": "Saccharomycetes", "order": "Saccharomycetales", "family": "", "subfamily": ""}	20140811	ncbi	SAMN02981501	GCA_000344705.1	20210414	2013/03/06
canmem1	Candida	membranifaciens	IST626	{"clade": "saccharomyceta", "kingdom": "Fungi", "phylum": "Ascomycota", "subphylum": "Saccharomycotina", "class": "Saccharomycetes", "order": "Saccharomycetales", "family": "", "subfamily": ""}	v1.0	jgi		Canmem1	None	Palma M et al.,2022
canmet1	Candida	metapsilosis		{"clade": "saccharomyceta", "kingdom": "Fungi", "phylum": "Ascomycota", "subphylum": "Saccharomycotina", "class": "Saccharomycetes", "order": "Saccharomycetales", "family": "", "subfamily": ""}	20210401	ncbi	SAMN17016193	GCA_017655625.1	20210414	2021/04/01
canort1	Candida	orthopsilosis	Co90125	{"clade": "saccharomyceta", "kingdom": "Fungi", "phylum": "Ascomycota", "subphylum": "Saccharomycotina", "class": "Saccharomycetes", "order": "Saccharomycetales", "family": "", "subfamily": ""}	0	jgi	501688	Canor1	20210414	Riccombeni A et al.,2012
canpar1	Candida	parapsilosis	CDC317	{"clade": "saccharomyceta", "kingdom": "Fungi", "phylum": "Ascomycota", "subphylum": "Saccharomycotina", "class": "Saccharomycetes", "order": "Saccharomycetales", "family": "", "subfamily": ""}	0	jgi	231408	Canpa1	20210414	Butler G et al.,2009
canpse1.1	Candida	pseudohaemulonii		{"clade": "Candida/Lodderomyces clade", "kingdom": "Fungi", "phylum": "Ascomycota", "subphylum": "Saccharomycotina", "class": "Saccharomycetes", "order": "Saccharomycetales", "family": "Debaryomycetaceae", "subfamily": ""}	20190909	ncbi	SAMN08714088	GCF_003013735.1	None	2018/03/22
cansub1	Candida	subhashii		{"clade": "saccharomyceta", "kingdom": "Fungi", "phylum": "Ascomycota", "subphylum": "Saccharomycotina", "class": "Saccharomycetes", "order": "Saccharomycetales", "family": "", "subfamily": ""}	2021-07-13	ncbi	cansub1	GCF_019202705.1	20210914	2021/07/13
cantan1	Candida	tanzawaensis	NRRLY17324	{"clade": "saccharomyceta", "kingdom": "Fungi", "phylum": "Ascomycota", "subphylum": "Saccharomycotina", "class": "Saccharomycetes", "order": "Saccharomycetales", "family": "", "subfamily": ""}	v1.0	jgi		Canta1	20210414	Riley R et al.,2016
cantro1	Candida	tropicalis	MYA3404	{"clade": "saccharomyceta", "kingdom": "Fungi", "phylum": "Ascomycota", "subphylum": "Saccharomycotina", "class": "Saccharomycetes", "order": "Saccharomycetales", "family": "", "subfamily": ""}	0	jgi		Cantro1	20210414	Guin K et al.,2020
canvis1	Candida	viswanathii		{"clade": "saccharomyceta", "kingdom": "Fungi", "phylum": "Ascomycota", "subphylum": "Saccharomycotina", "class": "Saccharomycetes", "order": "Saccharomycetales", "family": "", "subfamily": ""}	20180718	ncbi	SAMN08818848	GCF_003327735.1	20210414	2018/07/18
capcor1	Capronia	coronata	CBS61796	{"clade": "leotiomyceta", "kingdom": "Fungi", "phylum": "Ascomycota", "subphylum": "Pezizomycotina", "class": "Eurotiomycetes", "subclass": "Chaetothyriomycetidae", "order": "Chaetothyriales", "family": "Herpotrichiellaceae", "subfamily": ""}	0	jgi	125651	Capcor1	20210709	Teixeira MM et al.,2017
capepi1	Capronia	epimyces	CBS60696	{"clade": "leotiomyceta", "kingdom": "Fungi", "phylum": "Ascomycota", "subphylum": "Pezizomycotina", "class": "Eurotiomycetes", "subclass": "Chaetothyriomycetidae", "order": "Chaetothyriales", "family": "Herpotrichiellaceae", "subfamily": ""}	0	jgi	125641	Capep1	20210709	Teixeira MM et al.,2017
capsem1	Capronia	semiimmersa	CBS27337	{"clade": "leotiomyceta", "kingdom": "Fungi", "phylum": "Ascomycota", "subphylum": "Pezizomycotina", "class": "Eurotiomycetes", "subclass": "Chaetothyriomycetidae", "order": "Chaetothyriales", "family": "Herpotrichiellaceae", "subfamily": ""}	0	jgi		Capse1	20210414	Teixeira MM et al.,2017
catang1	Catenaria	anguillulae	PL171	{"clade": "Opisthokonta", "kingdom": "Fungi", "phylum": "Blastocladiomycota", "class": "Blastocladiomycetes", "order": "Blastocladiales", "family": "Catenariaceae", "subphylum": "", "subfamily": ""}	v2.0	jgi		Catan2	20210414	Mondo SJ et al.,2017
caupro1	Caulochytrium	protostelioides	ATCC52028	{"clade": "Opisthokonta", "kingdom": "Fungi", "phylum": "Chytridiomycota", "class": "Chytridiomycetes", "order": "Caulochytriales", "family": "Caulochytriaceae", "subphylum": "", "subfamily": ""}	v1.0	jgi		Caupr1	20210414	Ahrendt SR et al.,2018
cengeo1	Cenococcum	geophilum	158	{"clade": "dothideomyceta", "kingdom": "Fungi", "phylum": "Ascomycota", "subphylum": "Pezizomycotina", "class": "Dothideomycetes", "subclass": "Pleosporomycetidae", "family": "Gloniaceae", "order": "", "subfamily": ""}	v2.0	jgi		Cenge3	20210414	Peter M et al.,2016
cerber1	Cercospora	berteroae	CBS53871	{"clade": "dothideomyceta", "kingdom": "Fungi", "phylum": "Ascomycota", "subphylum": "Pezizomycotina", "class": "Dothideomycetes", "subclass": "Dothideomycetidae", "order": "Mycosphaerellales", "family": "Mycosphaerellaceae", "subfamily": ""}	0	jgi		Cerbe1	20210414	de Jonge R et al.,2018
cerbet1	Cercospora	beticola		{"clade": "dothideomyceta", "kingdom": "Fungi", "phylum": "Ascomycota", "subphylum": "Pezizomycotina", "class": "Dothideomycetes", "subclass": "Dothideomycetidae", "order": "Mycosphaerellales", "family": "Mycosphaerellaceae", "subfamily": ""}	20171103	ncbi	SAMN03265455	GCF_002742065.1	20210414	2017/11/02
cerbom1	Ceraceosorus	bombacis	ATCC22867	{"clade": "Opisthokonta", "kingdom": "Fungi", "phylum": "Basidiomycota", "subphylum": "Ustilaginomycotina", "class": "Exobasidiomycetes", "order": "Ceraceosorales", "family": "Ceraceosoraceae", "subfamily": ""}	0	jgi		Cerbo1	20210414	Sharma R et al.,2015
cerfim1	Ceratocystis	fimbriata	CBS114723	{"clade": "sordariomyceta", "kingdom": "Fungi", "phylum": "Ascomycota", "subphylum": "Pezizomycotina", "class": "Sordariomycetes", "subclass": "Hypocreomycetidae", "order": "Microascales", "family": "Ceratocystidaceae", "subfamily": ""}	20171018	ncbi	SAMN01985854	GCA_000389695.3	20210414	2013/05/06
cergua1	Ceraceosorus	guamensis	MCA4658	{"clade": "Opisthokonta", "kingdom": "Fungi", "phylum": "Basidiomycota", "subphylum": "Ustilaginomycotina", "class": "Exobasidiomycetes", "order": "Ceraceosorales", "family": "Ceraceosoraceae", "subfamily": ""}	v1.0	jgi		Cersp1	20210414	Kijpornyongpan T et al.,2018
cerkik1	Cercospora	kikuchii		{"clade": "dothideomyceta", "kingdom": "Fungi", "phylum": "Ascomycota", "subphylum": "Pezizomycotina", "class": "Dothideomycetes", "subclass": "Dothideomycetidae", "order": "Mycosphaerellales", "family": "Mycosphaerellaceae", "subfamily": ""}	2021-07-08	ncbi	cerkik1	GCF_019650295.1	20210914	2021/07/08
cerpla1.1	Ceratocystis	platani		{"clade": "sordariomyceta", "kingdom": "Fungi", "phylum": "Ascomycota", "subphylum": "Pezizomycotina", "class": "Sordariomycetes", "subclass": "Hypocreomycetidae", "order": "Microascales", "family": "Ceratocystidaceae", "subfamily": ""}	20150423	ncbi	SAMN03418558	GCA_000978885.1	None	2015/04/23
cersp.10	Ceratobasidium	sp.	AGBa	{"clade": "Opisthokonta", "kingdom": "Fungi", "phylum": "Basidiomycota", "subphylum": "Agaricomycotina", "class": "Agaricomycetes", "order": "Cantharellales", "family": "Ceratobasidiaceae", "subfamily": ""}	2021-02-18 00:00:00	ncbi	cersp.10	GCA_016906555.1	20210421	2021/02/18
cersp.11	Ceratobasidium	sp.	AGBa	{"clade": "Opisthokonta", "kingdom": "Fungi", "phylum": "Basidiomycota", "subphylum": "Agaricomycotina", "class": "Agaricomycetes", "order": "Cantharellales", "family": "Ceratobasidiaceae", "subfamily": ""}	2021-02-18 00:00:00	ncbi	cersp.11	GCA_016906575.1	20210421	2021/02/18
cersp.13	Ceratobasidium	sp.	392	{"clade": "Opisthokonta", "kingdom": "Fungi", "phylum": "Basidiomycota", "subphylum": "Agaricomycotina", "class": "Agaricomycetes", "order": "Cantharellales", "family": "Ceratobasidiaceae", "subfamily": ""}	2021-08-18	ncbi	cersp.13	GCA_019677385.1	20210914	2021/08/18
cersp.14	Ceratobasidium	sp.	370	{"clade": "Opisthokonta", "kingdom": "Fungi", "phylum": "Basidiomycota", "subphylum": "Agaricomycotina", "class": "Agaricomycetes", "order": "Cantharellales", "family": "Ceratobasidiaceae", "subfamily": ""}	2021-08-18	ncbi	cersp.14	GCA_019677355.1	20210914	2021/08/18
cersp.15	Ceratobasidium	sp.	UAMH11750	{"clade": "Opisthokonta", "kingdom": "Fungi", "phylum": "Basidiomycota", "subphylum": "Agaricomycotina", "class": "Agaricomycetes", "order": "Cantharellales", "family": "Ceratobasidiaceae", "subfamily": ""}	2021-08-18	ncbi	cersp.15	GCA_019677335.1	20210914	2021/08/18
cersp.16	Ceratobasidium	sp.	428	{"clade": "Opisthokonta", "kingdom": "Fungi", "phylum": "Basidiomycota", "subphylum": "Agaricomycotina", "class": "Agaricomycetes", "order": "Cantharellales", "family": "Ceratobasidiaceae", "subfamily": ""}	2021-08-16	ncbi	cersp.16	GCA_019623705.1	20210914	2021/08/16
cersp.17	Ceratobasidium	sp.	414	{"clade": "Opisthokonta", "kingdom": "Fungi", "phylum": "Basidiomycota", "subphylum": "Agaricomycotina", "class": "Agaricomycetes", "order": "Cantharellales", "family": "Ceratobasidiaceae", "subfamily": ""}	2021-08-16	ncbi	cersp.17	GCA_019616945.1	20210914	2021/08/16
cersp.18	Cercophora	sp.	CE1	{"clade": "sordariomyceta", "kingdom": "Fungi", "phylum": "Ascomycota", "subphylum": "Pezizomycotina", "class": "Sordariomycetes", "subclass": "Sordariomycetidae", "order": "Sordariales", "family": "Lasiosphaeriaceae", "subfamily": ""}	1	new		cerco_ce1	None	True
cersp.4	Ceratobasidium	sp.	anastomosisgroupIDN8442	{"clade": "Opisthokonta", "kingdom": "Fungi", "phylum": "Basidiomycota", "subphylum": "Agaricomycotina", "class": "Agaricomycetes", "order": "Cantharellales", "family": "Ceratobasidiaceae", "subfamily": ""}	v1.0	jgi		CerAGI	20210414	Miyauchi S et al.,2020
certhe1	Ceratobasidium	theobromae		{"clade": "Opisthokonta", "kingdom": "Fungi", "phylum": "Basidiomycota", "subphylum": "Agaricomycotina", "class": "Agaricomycetes", "order": "Cantharellales", "family": "Ceratobasidiaceae", "subfamily": ""}	20191015	ncbi	SAMN11038547	GCA_009078325.1	20210414	2019/10/15
cerzei1	Cercospora	zeina		{"clade": "dothideomyceta", "kingdom": "Fungi", "phylum": "Ascomycota", "subphylum": "Pezizomycotina", "class": "Dothideomycetes", "subclass": "Dothideomycetidae", "order": "Mycosphaerellales", "family": "Mycosphaerellaceae", "subfamily": ""}	20171219	ncbi	SAMN06067857	GCA_002844615.1	20210414	2017/12/19
chafun1	Chaetomium	funicola	MPISDFRAT0129	{"clade": "sordariomyceta", "kingdom": "Fungi", "phylum": "Ascomycota", "subphylum": "Pezizomycotina", "class": "Sordariomycetes", "subclass": "Sordariomycetidae", "order": "Sordariales", "family": "Chaetomiaceae", "subfamily": ""}	v1.0	jgi		Chafu1	20210414	Mesny F et al.,2021
chaglo1	Chaetomium	globosum	MPISDFRAT0079	{"clade": "sordariomyceta", "kingdom": "Fungi", "phylum": "Ascomycota", "subphylum": "Pezizomycotina", "class": "Sordariomycetes", "subclass": "Sordariomycetidae", "order": "Sordariales", "family": "Chaetomiaceae", "subfamily": ""}	v1.0	jgi		Chagl1	20210421	Mesny F et al.,2021
chaglo2.1	Chaetomium	globosum	CBS14851	{"clade": "sordariomyceta", "kingdom": "Fungi", "phylum": "Ascomycota", "subphylum": "Pezizomycotina", "class": "Sordariomycetes", "subclass": "Sordariomycetidae", "order": "Sordariales", "family": "Chaetomiaceae", "subfamily": ""}	2014-08-06 00:00:00	ncbi	chaglo2	GCF_000143365.1	None	2005/03/14
chalon1	Chalara	longipes	BDJ	{"clade": "sordariomyceta", "kingdom": "Fungi", "phylum": "Ascomycota", "subphylum": "Pezizomycotina", "class": "Leotiomycetes", "order": "Helotiales", "family": "", "subfamily": ""}	v1.0	jgi		Chalo1	20210414	Barbi F et al.,2020
chasp.2	Chaetomium	sp.	MPICAGEAT0009	{"clade": "sordariomyceta", "kingdom": "Fungi", "phylum": "Ascomycota", "subphylum": "Pezizomycotina", "class": "Sordariomycetes", "subclass": "Sordariomycetidae", "order": "Sordariales", "family": "Chaetomiaceae", "subfamily": ""}	v1.0	jgi		Chame1	20210414	Mesny F et al.,2021
chasp.4	Chaetothyriales	sp.	CBS134920	{"clade": "leotiomyceta", "kingdom": "Fungi", "phylum": "Ascomycota", "subphylum": "Pezizomycotina", "class": "Eurotiomycetes", "subclass": "Chaetothyriomycetidae", "order": "", "family": "", "subfamily": ""}	20181029	ncbi	SAMN09487414	GCA_003693665.1	20210414	2018/10/29
chasp.5	Chaetothyriales	sp.	CBS135597	{"clade": "leotiomyceta", "kingdom": "Fungi", "phylum": "Ascomycota", "subphylum": "Pezizomycotina", "class": "Eurotiomycetes", "subclass": "Chaetothyriomycetidae", "order": "", "family": "", "subfamily": ""}	20181102	ncbi	SAMN09487417	GCA_003709825.1	20210414	2018/11/02
chasp.6	Chaetothyriales	sp.	CBS132003	{"clade": "leotiomyceta", "kingdom": "Fungi", "phylum": "Ascomycota", "subphylum": "Pezizomycotina", "class": "Eurotiomycetes", "subclass": "Chaetothyriomycetidae", "order": "", "family": "", "subfamily": ""}	20181102	ncbi	SAMN09487416	GCA_003709865.1	20210414	2018/11/02
chasp.7	Chaetothyriales	sp.	CBS134916	{"clade": "leotiomyceta", "kingdom": "Fungi", "phylum": "Ascomycota", "subphylum": "Pezizomycotina", "class": "Eurotiomycetes", "subclass": "Chaetothyriomycetidae", "order": "", "family": "", "subfamily": ""}	20181102	ncbi	SAMN09487415	GCA_003709845.1	20210414	2018/11/02
chathe1	Chaetomium	thermophilum	varthermophilumDSM1495	{"clade": "sordariomyceta", "kingdom": "Fungi", "phylum": "Ascomycota", "subphylum": "Pezizomycotina", "class": "Sordariomycetes", "subclass": "Sordariomycetidae", "order": "Sordariales", "family": "Chaetomiaceae", "subfamily": ""}	0	jgi		Chathe1	20210414	Amlacher S et al.,2011~Bock T et al.,2014
chivir1.1	Chiua	virens		{"clade": "Opisthokonta", "kingdom": "Fungi", "phylum": "Basidiomycota", "subphylum": "Agaricomycotina", "class": "Agaricomycetes", "subclass": "Agaricomycetidae", "order": "Boletales", "suborder": "Boletineae", "family": "Boletaceae", "subfamily": "Zangioideae"}	2021-08-27	ncbi	chivir1	GCA_019787685.1	None	2021/08/27
chlaer1	Chlorociboria	aeruginascens		{"clade": "sordariomyceta", "kingdom": "Fungi", "phylum": "Ascomycota", "subphylum": "Pezizomycotina", "class": "Leotiomycetes", "order": "Helotiales", "family": "Chlorociboriaceae", "subfamily": ""}	20190226	ncbi	SAMN06706673	GCA_002276475.2	20210414	2017/08/29
choven1	Choiromyces	venosus	1206131	{"clade": "saccharomyceta", "kingdom": "Fungi", "phylum": "Ascomycota", "subphylum": "Pezizomycotina", "class": "Pezizomycetes", "order": "Pezizales", "family": "Tuberaceae", "subfamily": ""}	v1.0	jgi		Chove1	20210414	Murat C et al.,2018
chycon1	Chytriomyces	confervae		{"clade": "Opisthokonta", "kingdom": "Fungi", "phylum": "Chytridiomycota", "class": "Chytridiomycetes", "order": "Chytridiales", "family": "Chytriomycetaceae", "subphylum": "", "subfamily": ""}	20190701	ncbi	SAMN08987275	GCA_006535975.1	20210414	2019/07/01
citmat1	Citeromyces	matritensis	NRRLY2407	{"clade": "saccharomyceta", "kingdom": "Fungi", "phylum": "Ascomycota", "subphylum": "Saccharomycotina", "class": "Saccharomycetes", "order": "Saccharomycetales", "family": "Saccharomycetaceae", "subfamily": ""}	0	jgi		Citma1	20210414	Krassowski T et al.,2018
claaff1.1	Claviceps	aff.	humidiphilagroupG2b	{"clade": "sordariomyceta", "kingdom": "Fungi", "phylum": "Ascomycota", "subphylum": "Pezizomycotina", "class": "Sordariomycetes", "subclass": "Hypocreomycetidae", "order": "Hypocreales", "family": "Clavicipitaceae", "subfamily": ""}	2021-05-14	ncbi	claaff1	GCA_018360325.1	None	2021/05/14
claaff2	Claviceps	aff.	purpurea	{"clade": "sordariomyceta", "kingdom": "Fungi", "phylum": "Ascomycota", "subphylum": "Pezizomycotina", "class": "Sordariomycetes", "subclass": "Hypocreomycetidae", "order": "Hypocreales", "family": "Clavicipitaceae", "subfamily": ""}	2021-05-14	ncbi	claaff2	GCA_022285415.1	20210709	2021/05/14
claafr1.1	Claviceps	africana		{"clade": "sordariomyceta", "kingdom": "Fungi", "phylum": "Ascomycota", "subphylum": "Pezizomycotina", "class": "Sordariomycetes", "subclass": "Hypocreomycetidae", "order": "Hypocreales", "family": "Clavicipitaceae", "subfamily": ""}	2021-05-14	ncbi	claafr1	GCA_018360145.1	None	2021/05/14
claaqu1	Clavariopsis	aquatica	WDA001	{"clade": "dothideomyceta", "kingdom": "Fungi", "phylum": "Ascomycota", "subphylum": "Pezizomycotina", "class": "Dothideomycetes", "subclass": "Pleosporomycetidae", "order": "Pleosporales", "family": "", "subfamily": ""}	0	jgi		Claaq1	20210414	Heeger F et al.,2021
claaru1	Claviceps	arundinis		{"clade": "sordariomyceta", "kingdom": "Fungi", "phylum": "Ascomycota", "subphylum": "Pezizomycotina", "class": "Sordariomycetes", "subclass": "Hypocreomycetidae", "order": "Hypocreales", "family": "Clavicipitaceae", "subfamily": ""}	2021-05-14	ncbi	claaru1	GCA_022288615.1	20210709	2021/05/14
claaru2.1	Claviceps	arundinis		{"clade": "sordariomyceta", "kingdom": "Fungi", "phylum": "Ascomycota", "subphylum": "Pezizomycotina", "class": "Sordariomycetes", "subclass": "Hypocreomycetidae", "order": "Hypocreales", "family": "Clavicipitaceae", "subfamily": ""}	2021-05-14	ncbi	claaru2	GCA_018360085.1	None	2021/05/14
claban1	Cladophialophora	bantiana	CBS17352	{"clade": "leotiomyceta", "kingdom": "Fungi", "phylum": "Ascomycota", "subphylum": "Pezizomycotina", "class": "Eurotiomycetes", "subclass": "Chaetothyriomycetidae", "order": "Chaetothyriales", "family": "Herpotrichiellaceae", "subfamily": ""}	0	jgi	301281	Claba1	20210414	Teixeira MM et al.,2017
clacap1	Claviceps	capensis		{"clade": "sordariomyceta", "kingdom": "Fungi", "phylum": "Ascomycota", "subphylum": "Pezizomycotina", "class": "Sordariomycetes", "subclass": "Hypocreomycetidae", "order": "Hypocreales", "family": "Clavicipitaceae", "subfamily": ""}	2021-05-14	ncbi	clacap1	GCA_022288535.1	20210709	2021/05/14
clacar1	Cladophialophora	carrionii	CBS16054	{"clade": "leotiomyceta", "kingdom": "Fungi", "phylum": "Ascomycota", "subphylum": "Pezizomycotina", "class": "Eurotiomycetes", "subclass": "Chaetothyriomycetidae", "order": "Chaetothyriales", "family": "Herpotrichiellaceae", "subfamily": ""}	0	jgi	85981	Claca1	20210414	Teixeira MM et al.,2017
clacit1.1	Claviceps	citrina		{"clade": "sordariomyceta", "kingdom": "Fungi", "phylum": "Ascomycota", "subphylum": "Pezizomycotina", "class": "Sordariomycetes", "subclass": "Hypocreomycetidae", "order": "Hypocreales", "family": "Clavicipitaceae", "subfamily": ""}	2021-05-14	ncbi	clacit1	GCA_018360365.1	None	2021/05/14
clacyp1	Claviceps	cyperi		{"clade": "sordariomyceta", "kingdom": "Fungi", "phylum": "Ascomycota", "subphylum": "Pezizomycotina", "class": "Sordariomycetes", "subclass": "Hypocreomycetidae", "order": "Hypocreales", "family": "Clavicipitaceae", "subfamily": ""}	2021-05-14	ncbi	clacyp1	GCA_022288585.1	20210709	2021/05/14
cladig1.1	Claviceps	digitariae		{"clade": "sordariomyceta", "kingdom": "Fungi", "phylum": "Ascomycota", "subphylum": "Pezizomycotina", "class": "Sordariomycetes", "subclass": "Hypocreomycetidae", "order": "Hypocreales", "family": "Clavicipitaceae", "subfamily": ""}	2021-05-14	ncbi	cladig1	GCA_018360205.1	None	2021/05/14
claely1	Clathrospora	elynae	CBS16151	{"clade": "dothideomyceta", "kingdom": "Fungi", "phylum": "Ascomycota", "subphylum": "Pezizomycotina", "class": "Dothideomycetes", "subclass": "Pleosporomycetidae", "order": "Pleosporales", "family": "Diademaceae", "subfamily": ""}	v1.0	jgi		Clael1	20210414	Haridas S et al.,2020
claful1	Cladosporium	fulvum		{"clade": "dothideomyceta", "kingdom": "Fungi", "phylum": "Ascomycota", "subphylum": "Pezizomycotina", "class": "Dothideomycetes", "subclass": "Dothideomycetidae", "order": "Cladosporiales", "family": "Cladosporiaceae", "subfamily": ""}	v1.0	jgi		Clafu1	20210414	de Wit PJ et al.,2012~Ohm RA et al.,2012
clagra1	Cladonia	grayi	CgrDA2mycss	{"clade": "OSLEUM clade", "kingdom": "Fungi", "phylum": "Ascomycota", "subphylum": "Pezizomycotina", "class": "Lecanoromycetes", "subclass": "Lecanoromycetidae", "order": "Lecanorales", "suborder": "Lecanorineae", "family": "Cladoniaceae", "subfamily": ""}	v2.0	jgi		Clagr3	20210414	Armaleo D et al.,2019
clahum1.1	Claviceps	humidiphila		{"clade": "sordariomyceta", "kingdom": "Fungi", "phylum": "Ascomycota", "subphylum": "Pezizomycotina", "class": "Sordariomycetes", "subclass": "Hypocreomycetidae", "order": "Hypocreales", "family": "Clavicipitaceae", "subfamily": ""}	2021-05-14	ncbi	clahum1	GCA_018360465.1	None	2021/05/14
claimm1	Cladophialophora	immunda	CBS83496	{"clade": "leotiomyceta", "kingdom": "Fungi", "phylum": "Ascomycota", "subphylum": "Pezizomycotina", "class": "Eurotiomycetes", "subclass": "Chaetothyriomycetidae", "order": "Chaetothyriales", "family": "Herpotrichiellaceae", "subfamily": ""}	0	jgi	301271	Claim1	20210414	Teixeira MM et al.,2017
clalov1.1	Claviceps	lovelessii		{"clade": "sordariomyceta", "kingdom": "Fungi", "phylum": "Ascomycota", "subphylum": "Pezizomycotina", "class": "Sordariomycetes", "subclass": "Hypocreomycetidae", "order": "Hypocreales", "family": "Clavicipitaceae", "subfamily": ""}	2021-05-14	ncbi	clalov1	GCA_018360185.1	None	2021/05/14
clalus2	Clavispora	lusitaniae	ATCC42720	{"clade": "saccharomyceta", "kingdom": "Fungi", "phylum": "Ascomycota", "subphylum": "Saccharomycotina", "class": "Saccharomycetes", "order": "Saccharomycetales", "family": "Metschnikowiaceae", "subfamily": ""}	0	jgi	4938	Clalu1_2	20210414	Butler G et al.,2009
clamax1.1	Claviceps	maximensis		{"clade": "sordariomyceta", "kingdom": "Fungi", "phylum": "Ascomycota", "subphylum": "Pezizomycotina", "class": "Sordariomycetes", "subclass": "Hypocreomycetidae", "order": "Hypocreales", "family": "Clavicipitaceae", "subfamily": ""}	2021-05-14	ncbi	clamax1	GCA_018360255.1	None	2021/05/14
clamon1	Claviceps	monticola		{"clade": "sordariomyceta", "kingdom": "Fungi", "phylum": "Ascomycota", "subphylum": "Pezizomycotina", "class": "Sordariomycetes", "subclass": "Hypocreomycetidae", "order": "Hypocreales", "family": "Clavicipitaceae", "subfamily": ""}	2021-05-14	ncbi	clamon1	GCA_022288675.1	20210709	2021/05/14
clapaz1	Claviceps	pazoutovae		{"clade": "sordariomyceta", "kingdom": "Fungi", "phylum": "Ascomycota", "subphylum": "Pezizomycotina", "class": "Sordariomycetes", "subclass": "Hypocreomycetidae", "order": "Hypocreales", "family": "Clavicipitaceae", "subfamily": ""}	2021-05-14	ncbi	clapaz1	GCA_022288525.1	20210709	2021/05/14
clapsa1	Cladophialophora	psammophila	CBS110553	{"clade": "leotiomyceta", "kingdom": "Fungi", "phylum": "Ascomycota", "subphylum": "Pezizomycotina", "class": "Eurotiomycetes", "subclass": "Chaetothyriomycetidae", "order": "Chaetothyriales", "family": "Herpotrichiellaceae", "subfamily": ""}	0	jgi	125631	Claps1	20210709	Teixeira MM et al.,2017
clapur1	Claviceps	purpurea	201	{"clade": "sordariomyceta", "kingdom": "Fungi", "phylum": "Ascomycota", "subphylum": "Pezizomycotina", "class": "Sordariomycetes", "subclass": "Hypocreomycetidae", "order": "Hypocreales", "family": "Clavicipitaceae", "subfamily": ""}	0	jgi		Clapu1	20210414	Schardl CL et al.,2013
clapus1.1	Claviceps	pusilla		{"clade": "sordariomyceta", "kingdom": "Fungi", "phylum": "Ascomycota", "subphylum": "Pezizomycotina", "class": "Sordariomycetes", "subclass": "Hypocreomycetidae", "order": "Hypocreales", "family": "Clavicipitaceae", "subfamily": ""}	2021-05-14	ncbi	clapus1	GCA_018360225.1	None	2021/05/14
clapyx1	Clavicorona	pyxidata	HHB10654	{"clade": "Opisthokonta", "kingdom": "Fungi", "phylum": "Basidiomycota", "subphylum": "Agaricomycotina", "class": "Agaricomycetes", "order": "Russulales", "family": "Auriscalpiaceae", "subfamily": ""}	v1.0	jgi		Clapy1	20210414	Looney B et al.,2022
clasor1.1	Claviceps	sorghi		{"clade": "sordariomyceta", "kingdom": "Fungi", "phylum": "Ascomycota", "subphylum": "Pezizomycotina", "class": "Sordariomycetes", "subclass": "Hypocreomycetidae", "order": "Hypocreales", "family": "Clavicipitaceae", "subfamily": ""}	2021-05-14	ncbi	clasor1	GCA_018360135.1	None	2021/05/14
clasp.10	Claviceps	sp.	LM84groupG4	{"clade": "sordariomyceta", "kingdom": "Fungi", "phylum": "Ascomycota", "subphylum": "Pezizomycotina", "class": "Sordariomycetes", "subclass": "Hypocreomycetidae", "order": "Hypocreales", "family": "Clavicipitaceae", "subfamily": ""}	2021-05-14	ncbi	clasp.10	GCA_022275515.1	20210709	2021/05/14
clasp.11	Claviceps	sp.	LM220groupG6	{"clade": "sordariomyceta", "kingdom": "Fungi", "phylum": "Ascomycota", "subphylum": "Pezizomycotina", "class": "Sordariomycetes", "subclass": "Hypocreomycetidae", "order": "Hypocreales", "family": "Clavicipitaceae", "subfamily": ""}	2021-05-14	ncbi	clasp.11	GCA_022283535.1	20210709	2021/05/14
clasp.2	Claviceps	sp.	LM218groupG6	{"clade": "sordariomyceta", "kingdom": "Fungi", "phylum": "Ascomycota", "subphylum": "Pezizomycotina", "class": "Sordariomycetes", "subclass": "Hypocreomycetidae", "order": "Hypocreales", "family": "Clavicipitaceae", "subfamily": ""}	2021-05-14	ncbi	clasp.2	GCA_018360435.1	20210709	2021/05/14
clasp.3	Claviceps	sp.	LM77groupG4	{"clade": "sordariomyceta", "kingdom": "Fungi", "phylum": "Ascomycota", "subphylum": "Pezizomycotina", "class": "Sordariomycetes", "subclass": "Hypocreomycetidae", "order": "Hypocreales", "family": "Clavicipitaceae", "subfamily": ""}	2021-05-14	ncbi	clasp.3	GCA_022275505.1	20210709	2021/05/14
clasp.4	Claviceps	sp.	Clav32groupG5	{"clade": "sordariomyceta", "kingdom": "Fungi", "phylum": "Ascomycota", "subphylum": "Pezizomycotina", "class": "Sordariomycetes", "subclass": "Hypocreomycetidae", "order": "Hypocreales", "family": "Clavicipitaceae", "subfamily": ""}	2021-05-14	ncbi	clasp.4	GCA_022286875.1	20210709	2021/05/14
clasp.5	Claviceps	sp.	Clav50groupG5	{"clade": "sordariomyceta", "kingdom": "Fungi", "phylum": "Ascomycota", "subphylum": "Pezizomycotina", "class": "Sordariomycetes", "subclass": "Hypocreomycetidae", "order": "Hypocreales", "family": "Clavicipitaceae", "subfamily": ""}	2021-05-14	ncbi	clasp.5	GCA_022286325.1	20210709	2021/05/14
clasp.6	Claviceps	sp.	LM78groupG4	{"clade": "sordariomyceta", "kingdom": "Fungi", "phylum": "Ascomycota", "subphylum": "Pezizomycotina", "class": "Sordariomycetes", "subclass": "Hypocreomycetidae", "order": "Hypocreales", "family": "Clavicipitaceae", "subfamily": ""}	2021-05-14	ncbi	clasp.6	GCA_018360385.1	20210709	2021/05/14
clasp.7	Claviceps	sp.	LM219groupG6	{"clade": "sordariomyceta", "kingdom": "Fungi", "phylum": "Ascomycota", "subphylum": "Pezizomycotina", "class": "Sordariomycetes", "subclass": "Hypocreomycetidae", "order": "Hypocreales", "family": "Clavicipitaceae", "subfamily": ""}	2021-05-14	ncbi	clasp.7	GCA_022283685.1	20210709	2021/05/14
clasp.8	Claviceps	sp.	LM454groupG7	{"clade": "sordariomyceta", "kingdom": "Fungi", "phylum": "Ascomycota", "subphylum": "Pezizomycotina", "class": "Sordariomycetes", "subclass": "Hypocreomycetidae", "order": "Hypocreales", "family": "Clavicipitaceae", "subfamily": ""}	2021-05-14	ncbi	clasp.8	GCA_018360575.1	20210709	2021/05/14
clasp.9	Claviceps	sp.	LM458groupG5	{"clade": "sordariomyceta", "kingdom": "Fungi", "phylum": "Ascomycota", "subphylum": "Pezizomycotina", "class": "Sordariomycetes", "subclass": "Hypocreomycetidae", "order": "Hypocreales", "family": "Clavicipitaceae", "subfamily": ""}	2021-05-14	ncbi	clasp.9	GCA_018360275.1	20210709	2021/05/14
claspa1	Claviceps	spartinae		{"clade": "sordariomyceta", "kingdom": "Fungi", "phylum": "Ascomycota", "subphylum": "Pezizomycotina", "class": "Sordariomycetes", "subclass": "Hypocreomycetidae", "order": "Hypocreales", "family": "Clavicipitaceae", "subfamily": ""}	2021-05-14	ncbi	claspa1	GCA_022288495.1	20210709	2021/05/14
clasph1	Cladosporium	sphaerospermum	UM843	{"clade": "dothideomyceta", "kingdom": "Fungi", "phylum": "Ascomycota", "subphylum": "Pezizomycotina", "class": "Dothideomycetes", "subclass": "Dothideomycetidae", "order": "Cladosporiales", "family": "Cladosporiaceae", "subfamily": ""}	0	jgi	199631	Clasph1	20210414	Ng KP et al.,2012
clayeg1	Cladophialophora	yegresii	CBS114405	{"clade": "leotiomyceta", "kingdom": "Fungi", "phylum": "Ascomycota", "subphylum": "Pezizomycotina", "class": "Eurotiomycetes", "subclass": "Chaetothyriomycetidae", "order": "Chaetothyriales", "family": "Herpotrichiellaceae", "subfamily": ""}	0	jgi	125621	Claye1	20210709	Teixeira MM et al.,2017
cligib1	Clitocybe	gibba	IJFMA808	{"clade": "Opisthokonta", "kingdom": "Fungi", "phylum": "Basidiomycota", "subphylum": "Agaricomycotina", "class": "Agaricomycetes", "subclass": "Agaricomycetidae", "order": "Agaricales", "family": "Tricholomataceae", "subfamily": ""}	v1.0	jgi		Cligib1	20210414	Ruiz-Dueñas FJ et al.,2021
cloaqu1	Clohesyomyces	aquaticus		{"clade": "dothideomyceta", "kingdom": "Fungi", "phylum": "Ascomycota", "subphylum": "Pezizomycotina", "class": "Dothideomycetes", "subclass": "Pleosporomycetidae", "order": "Pleosporales", "family": "Lindgomycetaceae", "subfamily": ""}	v1.0	jgi		Cloaq1	20210414	Mondo SJ et al.,2017
clobys1.1	Clonostachys	byssicola		{"clade": "sordariomyceta", "kingdom": "Fungi", "phylum": "Ascomycota", "subphylum": "Pezizomycotina", "class": "Sordariomycetes", "subclass": "Hypocreomycetidae", "order": "Hypocreales", "family": "Bionectriaceae", "subfamily": ""}	2021-01-25	ncbi	clobys1	GCA_902006505.2	None	2021/01/25
clorhi1.1	Clonostachys	rhizophaga		{"clade": "sordariomyceta", "kingdom": "Fungi", "phylum": "Ascomycota", "subphylum": "Pezizomycotina", "class": "Sordariomycetes", "subclass": "Hypocreomycetidae", "order": "Hypocreales", "family": "Bionectriaceae", "subfamily": ""}	2021-01-25	ncbi	clorhi1	GCA_902077795.2	None	2021/01/25
cloros2	Clonostachys	rosea	IK726	{"clade": "sordariomyceta", "kingdom": "Fungi", "phylum": "Ascomycota", "subphylum": "Pezizomycotina", "class": "Sordariomycetes", "subclass": "Hypocreomycetidae", "order": "Hypocreales", "family": "Bionectriaceae", "subfamily": ""}	0	jgi		Cloros1	None	Karlsson M et al.,2015~Broberg M et al.,2018~Broberg M et al.,2021
closol1.1	Clonostachys	solani		{"clade": "sordariomyceta", "kingdom": "Fungi", "phylum": "Ascomycota", "subphylum": "Pezizomycotina", "class": "Sordariomycetes", "subclass": "Hypocreomycetidae", "order": "Hypocreales", "family": "Bionectriaceae", "subfamily": ""}	2021-01-25	ncbi	closol1	GCA_902141235.2	None	2021/01/25
coccar1	Cochliobolus	carbonum	26R13	{"clade": "dothideomyceta", "kingdom": "Fungi", "phylum": "Ascomycota", "subphylum": "Pezizomycotina", "class": "Dothideomycetes", "subclass": "Pleosporomycetidae", "order": "Pleosporales", "suborder": "Pleosporineae", "family": "Pleosporaceae", "subfamily": ""}	v1.0	jgi		Cocca1	20210414	Condon BJ et al.,2013
cocimm1	Coccidioides	immitis	RS	{"clade": "leotiomyceta", "kingdom": "Fungi", "phylum": "Ascomycota", "subphylum": "Pezizomycotina", "class": "Eurotiomycetes", "subclass": "Eurotiomycetidae", "order": "Onygenales", "family": "", "subfamily": ""}	0	jgi	292488	Cocim1	20210421	Sharpton TJ et al.,2009
cocimm2.1	Coccidioides	immitis	RMSCC3703	{"clade": "leotiomyceta", "kingdom": "Fungi", "phylum": "Ascomycota", "subphylum": "Pezizomycotina", "class": "Eurotiomycetes", "subclass": "Eurotiomycetidae", "order": "Onygenales", "family": "Onygenaceae", "subfamily": ""}	2015-07-13 00:00:00	ncbi	cocimm2	GCA_000150085.1	None	2007/07/12
cocimm3.1	Coccidioides	immitis	H5384	{"clade": "leotiomyceta", "kingdom": "Fungi", "phylum": "Ascomycota", "subphylum": "Pezizomycotina", "class": "Eurotiomycetes", "subclass": "Eurotiomycetidae", "order": "Onygenales", "family": "Onygenaceae", "subfamily": ""}	2015-07-13 00:00:00	ncbi	cocimm3	GCA_000149815.1	None	2006/09/22
cocimm4.1	Coccidioides	immitis	RMSCC2394	{"clade": "leotiomyceta", "kingdom": "Fungi", "phylum": "Ascomycota", "subphylum": "Pezizomycotina", "class": "Eurotiomycetes", "subclass": "Eurotiomycetidae", "order": "Onygenales", "family": "Onygenaceae", "subfamily": ""}	2015-07-13 00:00:00	ncbi	cocimm4	GCA_000149895.1	None	2006/11/02
coclun1	Cochliobolus	lunatus	m118	{"clade": "dothideomyceta", "kingdom": "Fungi", "phylum": "Ascomycota", "subphylum": "Pezizomycotina", "class": "Dothideomycetes", "subclass": "Pleosporomycetidae", "order": "Pleosporales", "suborder": "Pleosporineae", "family": "Pleosporaceae", "subfamily": ""}	v2.0	jgi		Coclu2	20210414	Condon BJ et al.,2013
cocmiy1	Cochliobolus	miyabeanus	ATCC44560	{"clade": "dothideomyceta", "kingdom": "Fungi", "phylum": "Ascomycota", "subphylum": "Pezizomycotina", "class": "Dothideomycetes", "subclass": "Pleosporomycetidae", "order": "Pleosporales", "suborder": "Pleosporineae", "family": "Pleosporaceae", "subfamily": ""}	v1.0	jgi		Cocmi1	20210414	Condon BJ et al.,2013
cocpos2	Coccidioides	posadasii	C735deltaSOWgp	{"clade": "leotiomyceta", "kingdom": "Fungi", "phylum": "Ascomycota", "subphylum": "Pezizomycotina", "class": "Eurotiomycetes", "subclass": "Eurotiomycetidae", "order": "Onygenales", "family": "", "subfamily": ""}	0	jgi	200378	Cocpo1_1	20210414	Sharpton TJ et al.,2009
cocpos3	Coccidioides	posadasii	Silveira	{"clade": "leotiomyceta", "kingdom": "Fungi", "phylum": "Ascomycota", "subphylum": "Pezizomycotina", "class": "Eurotiomycetes", "subclass": "Eurotiomycetidae", "order": "Onygenales", "family": "", "subfamily": ""}	0	jgi		Cocpos1	20210421	Neafsey DE et al.,2010
cocpos4.1	Coccidioides	posadasii	strSilveira	{"clade": "leotiomyceta", "kingdom": "Fungi", "phylum": "Ascomycota", "subphylum": "Pezizomycotina", "class": "Eurotiomycetes", "subclass": "Eurotiomycetidae", "order": "Onygenales", "family": "Onygenaceae", "subfamily": ""}	2015-07-13 00:00:00	ncbi	cocpos4	GCA_000170175.2	None	2007/05/31
cocpos5.1	Coccidioides	posadasii	RMSCC3488	{"clade": "leotiomyceta", "kingdom": "Fungi", "phylum": "Ascomycota", "subphylum": "Pezizomycotina", "class": "Eurotiomycetes", "subclass": "Eurotiomycetidae", "order": "Onygenales", "family": "Onygenaceae", "subfamily": ""}	2015-06-29 00:00:00	ncbi	cocpos5	GCA_000150055.1	None	2007/07/12
cocpos6.1	Coccidioides	posadasii	strSilveira	{"clade": "leotiomyceta", "kingdom": "Fungi", "phylum": "Ascomycota", "subphylum": "Pezizomycotina", "class": "Eurotiomycetes", "subclass": "Eurotiomycetidae", "order": "Onygenales", "family": "Onygenaceae", "subfamily": ""}	2021-05-20	ncbi	cocpos6	GCA_018416015.2	None	2021/05/20
cocsat1	Cochliobolus	sativus	ND90Pr	{"clade": "dothideomyceta", "kingdom": "Fungi", "phylum": "Ascomycota", "subphylum": "Pezizomycotina", "class": "Dothideomycetes", "subclass": "Pleosporomycetidae", "order": "Pleosporales", "suborder": "Pleosporineae", "family": "Pleosporaceae", "subfamily": ""}	v1.0	jgi		Cocsa1	20210414	Ohm RA et al.,2012~Condon BJ et al.,2013
cocvic1	Cochliobolus	victoriae	FI3	{"clade": "dothideomyceta", "kingdom": "Fungi", "phylum": "Ascomycota", "subphylum": "Pezizomycotina", "class": "Dothideomycetes", "subclass": "Pleosporomycetidae", "order": "Pleosporales", "suborder": "Pleosporineae", "family": "Pleosporaceae", "subfamily": ""}	v1.0	jgi		Cocvi1	20210414	Condon BJ et al.,2013
coerev1	Coemansia	reversa	NRRL1564	{"clade": "Opisthokonta", "kingdom": "Fungi", "phylum": "Zoopagomycota", "subphylum": "Kickxellomycotina", "class": "Kickxellomycetes", "order": "Kickxellales", "family": "Kickxellaceae", "subfamily": ""}	v1.0	jgi		Coere1	20210414	Chang Y et al.,2015
colaen1	Colletotrichum	aenigma		{"clade": "sordariomyceta", "kingdom": "Fungi", "phylum": "Ascomycota", "subphylum": "Pezizomycotina", "class": "Sordariomycetes", "subclass": "Hypocreomycetidae", "order": "Glomerellales", "family": "Glomerellaceae", "subfamily": ""}	20200706	ncbi	SAMN09531619	GCF_013390185.1	20210414	2020/07/06
colasi1	Colletotrichum	asianum		{"clade": "sordariomyceta", "kingdom": "Fungi", "phylum": "Ascomycota", "subphylum": "Pezizomycotina", "class": "Sordariomycetes", "subclass": "Hypocreomycetidae", "order": "Glomerellales", "family": "Glomerellaceae", "subfamily": ""}	20200103	ncbi	SAMN13475008	GCA_009806415.1	20210414	2019/12/27
colcam1.1	Colletotrichum	camelliae		{"clade": "sordariomyceta", "kingdom": "Fungi", "phylum": "Ascomycota", "subphylum": "Pezizomycotina", "class": "Sordariomycetes", "subclass": "Hypocreomycetidae", "order": "Glomerellales", "family": "Glomerellaceae", "subfamily": ""}	2021-09-10	ncbi	colcam1	GCA_011947485.2	None	2020/04/03
colchl1	Colletotrichum	chlorophyti	NTL11	{"clade": "sordariomyceta", "kingdom": "Fungi", "phylum": "Ascomycota", "subphylum": "Pezizomycotina", "class": "Sordariomycetes", "subclass": "Hypocreomycetidae", "order": "Glomerellales", "family": "Glomerellaceae", "subfamily": ""}	0	jgi	944181	Colch1	20210414	Gan P et al.,2017
colcra1	Coleophoma	crateriformis		{"clade": "sordariomyceta", "kingdom": "Fungi", "phylum": "Ascomycota", "subphylum": "Pezizomycotina", "class": "Leotiomycetes", "order": "Helotiales", "family": "Dermateaceae", "subfamily": ""}	20180810	ncbi	SAMN07177961	GCA_003369635.1	20210414	2018/08/10
colcyl1	Coleophoma	cylindrospora		{"clade": "sordariomyceta", "kingdom": "Fungi", "phylum": "Ascomycota", "subphylum": "Pezizomycotina", "class": "Leotiomycetes", "order": "Helotiales", "family": "Dermateaceae", "subfamily": ""}	20180810	ncbi	SAMN07195328	GCA_003369665.1	20210414	2018/08/10
colfio1	Colletotrichum	fioriniae	PJ7	{"clade": "sordariomyceta", "kingdom": "Fungi", "phylum": "Ascomycota", "subphylum": "Pezizomycotina", "class": "Sordariomycetes", "subclass": "Hypocreomycetidae", "order": "Glomerellales", "family": "Glomerellaceae", "subfamily": ""}	0	jgi	124331	Colfi1	20210414	Baroncelli R et al.,2014
colfru1	Colletotrichum	fructicola		{"clade": "sordariomyceta", "kingdom": "Fungi", "phylum": "Ascomycota", "subphylum": "Pezizomycotina", "class": "Sordariomycetes", "subclass": "Hypocreomycetidae", "order": "Glomerellales", "family": "Glomerellaceae", "subfamily": ""}	20191218	ncbi	SAMN11398962	GCF_009771025.1	20210414	2019/12/18
colfru2	Colletotrichum	fructicola	Naragc5	{"clade": "sordariomyceta", "kingdom": "Fungi", "phylum": "Ascomycota", "subphylum": "Pezizomycotina", "class": "Sordariomycetes", "subclass": "Hypocreomycetidae", "order": "Glomerellales", "family": "Glomerellaceae", "subfamily": ""}	20200512	ncbi	SAMN02981487	GCA_000319635.2	20210414	2012/12/12
colfru3	Colletotrichum	fructicola		{"clade": "sordariomyceta", "kingdom": "Fungi", "phylum": "Ascomycota", "subphylum": "Pezizomycotina", "class": "Sordariomycetes", "subclass": "Hypocreomycetidae", "order": "Glomerellales", "family": "Glomerellaceae", "subfamily": ""}	20200706	ncbi	SAMN09531621	GCA_013390205.1	20210414	2020/07/06
colfru4	Colletotrichum	fructicola		{"clade": "sordariomyceta", "kingdom": "Fungi", "phylum": "Ascomycota", "subphylum": "Pezizomycotina", "class": "Sordariomycetes", "subclass": "Hypocreomycetidae", "order": "Glomerellales", "family": "Glomerellaceae", "subfamily": ""}	20200429	ncbi	SAMN09448926	GCA_012932255.1	20210414	2020/04/29
colfru5	Colletotrichum	fructicola		{"clade": "sordariomyceta", "kingdom": "Fungi", "phylum": "Ascomycota", "subphylum": "Pezizomycotina", "class": "Sordariomycetes", "subclass": "Hypocreomycetidae", "order": "Glomerellales", "family": "Glomerellaceae", "subfamily": ""}	20200601	ncbi	SAMN09531623	GCA_013201925.1	20210414	2020/06/01
colfru6	Colletotrichum	fructicola		{"clade": "sordariomyceta", "kingdom": "Fungi", "phylum": "Ascomycota", "subphylum": "Pezizomycotina", "class": "Sordariomycetes", "subclass": "Hypocreomycetidae", "order": "Glomerellales", "family": "Glomerellaceae", "subfamily": ""}	20200601	ncbi	SAMN09531622	GCA_013201905.1	20210414	2020/06/01
colfru7	Colletotrichum	fructicola		{"clade": "sordariomyceta", "kingdom": "Fungi", "phylum": "Ascomycota", "subphylum": "Pezizomycotina", "class": "Sordariomycetes", "subclass": "Hypocreomycetidae", "order": "Glomerellales", "family": "Glomerellaceae", "subfamily": ""}	20200601	ncbi	SAMN09531624	GCA_013201875.1	20210414	2020/06/01
colglo1	Colletotrichum	gloeosporioides	Cg14	{"clade": "sordariomyceta", "kingdom": "Fungi", "phylum": "Ascomycota", "subphylum": "Pezizomycotina", "class": "Sordariomycetes", "subclass": "Hypocreomycetidae", "order": "Glomerellales", "family": "Glomerellaceae", "subfamily": ""}	0	jgi	48741	Colgl1	20210414	Alkan N et al.,2013
colgra1	Colletotrichum	graminicola	M1001	{"clade": "sordariomyceta", "kingdom": "Fungi", "phylum": "Ascomycota", "subphylum": "Pezizomycotina", "class": "Sordariomycetes", "subclass": "Hypocreomycetidae", "order": "Glomerellales", "family": "Glomerellaceae", "subfamily": ""}	0	jgi	201088	Colgr1	20210414	O'Connell RJ et al.,2012
colhig1	Colletotrichum	higginsianum	IMI349063	{"clade": "sordariomyceta", "kingdom": "Fungi", "phylum": "Ascomycota", "subphylum": "Pezizomycotina", "class": "Sordariomycetes", "subclass": "Hypocreomycetidae", "order": "Glomerellales", "family": "Glomerellaceae", "subfamily": ""}	0	jgi		Colhig2	20210414	Zampounis A et al.,2016~O'Connell RJ et al.,2012
colinc1	Colletotrichum	incanum	MAFF238712	{"clade": "sordariomyceta", "kingdom": "Fungi", "phylum": "Ascomycota", "subphylum": "Pezizomycotina", "class": "Sordariomycetes", "subclass": "Hypocreomycetidae", "order": "Glomerellales", "family": "Glomerellaceae", "subfamily": ""}	0	jgi	862991	Colin1	20210414	Gan P et al.,2016
colkar1	Colletotrichum	karsti		{"clade": "sordariomyceta", "kingdom": "Fungi", "phylum": "Ascomycota", "subphylum": "Pezizomycotina", "class": "Sordariomycetes", "subclass": "Hypocreomycetidae", "order": "Glomerellales", "family": "Glomerellaceae", "subfamily": ""}	20201208	ncbi	SAMN14421089	GCF_011947395.1	20210414	2020/04/03
colmus1	Colletotrichum	musicola		{"clade": "sordariomyceta", "kingdom": "Fungi", "phylum": "Ascomycota", "subphylum": "Pezizomycotina", "class": "Sordariomycetes", "subclass": "Hypocreomycetidae", "order": "Glomerellales", "family": "Glomerellaceae", "subfamily": ""}	20200818	ncbi	SAMN13025166	GCA_014235935.1	20210414	2020/08/18
colnym1	Colletotrichum	nymphaeae	SA01	{"clade": "sordariomyceta", "kingdom": "Fungi", "phylum": "Ascomycota", "subphylum": "Pezizomycotina", "class": "Sordariomycetes", "subclass": "Hypocreomycetidae", "order": "Glomerellales", "family": "Glomerellaceae", "subfamily": ""}	0	jgi	642751	Colny1	20210414	Baroncelli R et al.,2016
colorb1	Colletotrichum	orbiculare	104T	{"clade": "sordariomyceta", "kingdom": "Fungi", "phylum": "Ascomycota", "subphylum": "Pezizomycotina", "class": "Sordariomycetes", "subclass": "Hypocreomycetidae", "order": "Glomerellales", "family": "Glomerellaceae", "subfamily": ""}	0	jgi		Colorb1	20210421	Gan P et al.,2013
colorb2	Colletotrichum	orbiculare	MAFF240422	{"clade": "sordariomyceta", "kingdom": "Fungi", "phylum": "Ascomycota", "subphylum": "Pezizomycotina", "class": "Sordariomycetes", "subclass": "Hypocreomycetidae", "order": "Glomerellales", "family": "Glomerellaceae", "subfamily": ""}	2019-03-22 00:00:00	ncbi	colorb2	GCA_000350065.2	20210421	2013/04/01
colorc1	Colletotrichum	orchidophilum	IMI309357	{"clade": "sordariomyceta", "kingdom": "Fungi", "phylum": "Ascomycota", "subphylum": "Pezizomycotina", "class": "Sordariomycetes", "subclass": "Hypocreomycetidae", "order": "Glomerellales", "family": "Glomerellaceae", "subfamily": ""}	0	jgi	848501	Color1	20210414	Baroncelli R et al.,2018
colplu1	Colletotrichum	plurivorum		{"clade": "sordariomyceta", "kingdom": "Fungi", "phylum": "Ascomycota", "subphylum": "Pezizomycotina", "class": "Sordariomycetes", "subclass": "Hypocreomycetidae", "order": "Glomerellales", "family": "Glomerellaceae", "subfamily": ""}	20200818	ncbi	SAMN13025176	GCA_014235945.1	20210414	2020/08/18
colsal1	Colletotrichum	salicis	CBS60794	{"clade": "sordariomyceta", "kingdom": "Fungi", "phylum": "Ascomycota", "subphylum": "Pezizomycotina", "class": "Sordariomycetes", "subclass": "Hypocreomycetidae", "order": "Glomerellales", "family": "Glomerellaceae", "subfamily": ""}	0	jgi	642771	Colsa1	20210414	Baroncelli R et al.,2016
colsan1	Colletotrichum	sansevieriae	GD	{"clade": "sordariomyceta", "kingdom": "Fungi", "phylum": "Ascomycota", "subphylum": "Pezizomycotina", "class": "Sordariomycetes", "subclass": "Hypocreomycetidae", "order": "Glomerellales", "family": "Glomerellaceae", "subfamily": ""}	0	slot		Colsan2	20220505	1
colsco1.1	Colletotrichum	scovillei		{"clade": "sordariomyceta", "kingdom": "Fungi", "phylum": "Ascomycota", "subphylum": "Pezizomycotina", "class": "Sordariomycetes", "subclass": "Hypocreomycetidae", "order": "Glomerellales", "family": "Glomerellaceae", "subfamily": ""}	20210309	ncbi	SAMN14073982	GCF_011075155.1	None	2020/03/09
colshi1	Colletotrichum	shisoi		{"clade": "sordariomyceta", "kingdom": "Fungi", "phylum": "Ascomycota", "subphylum": "Pezizomycotina", "class": "Sordariomycetes", "subclass": "Hypocreomycetidae", "order": "Glomerellales", "family": "Glomerellaceae", "subfamily": ""}	20190930	ncbi	SAMN08389744	GCA_006783085.1	20210414	2019/07/09
colsia1	Colletotrichum	siamense		{"clade": "sordariomyceta", "kingdom": "Fungi", "phylum": "Ascomycota", "subphylum": "Pezizomycotina", "class": "Sordariomycetes", "subclass": "Hypocreomycetidae", "order": "Glomerellales", "family": "Glomerellaceae", "subfamily": ""}	20200706	ncbi	SAMN09531620	GCF_013390195.1	20210414	2020/07/06
colsia2	Colletotrichum	siamense		{"clade": "sordariomyceta", "kingdom": "Fungi", "phylum": "Ascomycota", "subphylum": "Pezizomycotina", "class": "Sordariomycetes", "subclass": "Hypocreomycetidae", "order": "Glomerellales", "family": "Glomerellaceae", "subfamily": ""}	20200601	ncbi	SAMN09531625	GCA_013201865.1	20210414	2020/06/01
colsia3	Colletotrichum	siamense		{"clade": "sordariomyceta", "kingdom": "Fungi", "phylum": "Ascomycota", "subphylum": "Pezizomycotina", "class": "Sordariomycetes", "subclass": "Hypocreomycetidae", "order": "Glomerellales", "family": "Glomerellaceae", "subfamily": ""}	20200601	ncbi	SAMN09531627	GCA_013201795.1	20210414	2020/06/01
colsia4	Colletotrichum	siamense		{"clade": "sordariomyceta", "kingdom": "Fungi", "phylum": "Ascomycota", "subphylum": "Pezizomycotina", "class": "Sordariomycetes", "subclass": "Hypocreomycetidae", "order": "Glomerellales", "family": "Glomerellaceae", "subfamily": ""}	20200601	ncbi	SAMN09531628	GCA_013201755.1	20210414	2020/06/01
colsia5	Colletotrichum	siamense		{"clade": "sordariomyceta", "kingdom": "Fungi", "phylum": "Ascomycota", "subphylum": "Pezizomycotina", "class": "Sordariomycetes", "subclass": "Hypocreomycetidae", "order": "Glomerellales", "family": "Glomerellaceae", "subfamily": ""}	20200601	ncbi	SAMN09531626	GCA_013201745.1	20210414	2020/06/01
colsid1	Colletotrichum	sidae		{"clade": "sordariomyceta", "kingdom": "Fungi", "phylum": "Ascomycota", "subphylum": "Pezizomycotina", "class": "Sordariomycetes", "subclass": "Hypocreomycetidae", "order": "Glomerellales", "family": "Glomerellaceae", "subfamily": ""}	20190322	ncbi	SAMN08770262	GCA_004367935.1	20210414	2019/03/22
colsim1	Colletotrichum	simmondsii	CBS122122	{"clade": "sordariomyceta", "kingdom": "Fungi", "phylum": "Ascomycota", "subphylum": "Pezizomycotina", "class": "Sordariomycetes", "subclass": "Hypocreomycetidae", "order": "Glomerellales", "family": "Glomerellaceae", "subfamily": ""}	0	jgi	642761	Colsi1	20210414	Baroncelli R et al.,2016
colsoj1	Colletotrichum	sojae		{"clade": "sordariomyceta", "kingdom": "Fungi", "phylum": "Ascomycota", "subphylum": "Pezizomycotina", "class": "Sordariomycetes", "subclass": "Hypocreomycetidae", "order": "Glomerellales", "family": "Glomerellaceae", "subfamily": ""}	20200818	ncbi	SAMN13025178	GCA_014235955.1	20210414	2020/08/18
colspi1	Colletotrichum	spinosum		{"clade": "sordariomyceta", "kingdom": "Fungi", "phylum": "Ascomycota", "subphylum": "Pezizomycotina", "class": "Sordariomycetes", "subclass": "Hypocreomycetidae", "order": "Glomerellales", "family": "Glomerellaceae", "subfamily": ""}	20190322	ncbi	SAMN08770268	GCA_004366825.1	20210414	2019/03/22
colsub1	Colletotrichum	sublineola	TX430BB	{"clade": "sordariomyceta", "kingdom": "Fungi", "phylum": "Ascomycota", "subphylum": "Pezizomycotina", "class": "Sordariomycetes", "subclass": "Hypocreomycetidae", "order": "Glomerellales", "family": "Glomerellaceae", "subfamily": ""}	0	jgi		Colsub1	20210414	Baroncelli R et al.,2014
coltan1	Colletotrichum	tanaceti		{"clade": "sordariomyceta", "kingdom": "Fungi", "phylum": "Ascomycota", "subphylum": "Pezizomycotina", "class": "Sordariomycetes", "subclass": "Hypocreomycetidae", "order": "Glomerellales", "family": "Glomerellaceae", "subfamily": ""}	20190514	ncbi	SAMN08130444	GCA_005350895.1	20210414	2019/05/14
coltof2	Colletotrichum	tofieldiae	861	{"clade": "sordariomyceta", "kingdom": "Fungi", "phylum": "Ascomycota", "subphylum": "Pezizomycotina", "class": "Sordariomycetes", "subclass": "Hypocreomycetidae", "order": "Glomerellales", "family": "Glomerellaceae", "subfamily": ""}	0	jgi	727761	Colto1	20210414	Hacquard S et al.,2016
coltri1	Colletotrichum	trifolii		{"clade": "sordariomyceta", "kingdom": "Fungi", "phylum": "Ascomycota", "subphylum": "Pezizomycotina", "class": "Sordariomycetes", "subclass": "Hypocreomycetidae", "order": "Glomerellales", "family": "Glomerellaceae", "subfamily": ""}	20190322	ncbi	SAMN10475057	GCA_004367215.1	20210414	2019/03/22
coltro1	Colletotrichum	tropicale		{"clade": "sordariomyceta", "kingdom": "Fungi", "phylum": "Ascomycota", "subphylum": "Pezizomycotina", "class": "Sordariomycetes", "subclass": "Hypocreomycetidae", "order": "Glomerellales", "family": "Glomerellaceae", "subfamily": ""}	20200601	ncbi	SAMN09531630	GCA_013201785.1	20210414	2020/06/01
coltru1	Colletotrichum	truncatum		{"clade": "sordariomyceta", "kingdom": "Fungi", "phylum": "Ascomycota", "subphylum": "Pezizomycotina", "class": "Sordariomycetes", "subclass": "Hypocreomycetidae", "order": "Glomerellales", "family": "Glomerellaceae", "subfamily": ""}	20200818	ncbi	SAMN12683944	GCF_014235925.1	20210414	2020/08/18
colvin1	Colletotrichum	viniferum		{"clade": "sordariomyceta", "kingdom": "Fungi", "phylum": "Ascomycota", "subphylum": "Pezizomycotina", "class": "Sordariomycetes", "subclass": "Hypocreomycetidae", "order": "Glomerellales", "family": "Glomerellaceae", "subfamily": ""}	20200601	ncbi	SAMN09531629	GCA_013201765.1	20210414	2020/06/01
conapo1	Coniosporium	apollinis	CBS100218	{"clade": "dothideomyceta", "kingdom": "Fungi", "phylum": "Ascomycota", "subphylum": "Pezizomycotina", "class": "Dothideomycetes", "order": "", "family": "", "subfamily": ""}	0	jgi		Conap1	20210414	Teixeira MM et al.,2017
concor1	Conidiobolus	coronatus	NRRL28638	{"clade": "Opisthokonta", "kingdom": "Fungi", "phylum": "Zoopagomycota", "subphylum": "Entomophthoromycotina", "class": "Entomophthoromycetes", "order": "Entomophthorales", "family": "Ancylistaceae", "subfamily": ""}	v1.0	jgi	649221	Conco1	20210414	Chang Y et al.,2015
conlig1	Coniochaeta	ligniaria	NRRL30616	{"clade": "sordariomyceta", "kingdom": "Fungi", "phylum": "Ascomycota", "subphylum": "Pezizomycotina", "class": "Sordariomycetes", "subclass": "Sordariomycetidae", "order": "Coniochaetales", "family": "Coniochaetaceae", "subfamily": ""}	v1.0	jgi		Conlig1	20210414	Jiménez DJ et al.,2017
conoli1	Coniophora	olivacea	MUCL20566	{"clade": "Opisthokonta", "kingdom": "Fungi", "phylum": "Basidiomycota", "subphylum": "Agaricomycotina", "class": "Agaricomycetes", "subclass": "Agaricomycetidae", "order": "Boletales", "suborder": "Coniophorineae", "family": "Coniophoraceae", "subfamily": ""}	v1.0	jgi		Conol1	20210414	Castanera R et al.,2017
conpul1.1	Coniochaeta	pulveracea		{"clade": "sordariomyceta", "kingdom": "Fungi", "phylum": "Ascomycota", "subphylum": "Pezizomycotina", "class": "Sordariomycetes", "subclass": "Sordariomycetidae", "order": "Coniochaetales", "family": "Coniochaetaceae", "subfamily": ""}	20181011	ncbi	SAMN09381543	GCA_003635345.1	None	2018/10/11
conput1.1	Coniophora	puteana	RWD64598SS2	{"clade": "Opisthokonta", "kingdom": "Fungi", "phylum": "Basidiomycota", "subphylum": "Agaricomycotina", "class": "Agaricomycetes", "subclass": "Agaricomycetidae", "order": "Boletales", "suborder": "Coniophorineae", "family": "Coniophoraceae", "subfamily": ""}	2014-08-11 00:00:00	ncbi	conput1	GCF_000271625.1	None	2012/06/21
consp.1	Coniochaeta	sp.	2T21	{"clade": "sordariomyceta", "kingdom": "Fungi", "phylum": "Ascomycota", "subphylum": "Pezizomycotina", "class": "Sordariomycetes", "subclass": "Sordariomycetidae", "order": "Coniochaetales", "family": "Coniochaetaceae", "subfamily": ""}	v1.0	jgi		Conioc1	20210414	Mondo SJ et al.,2019
copang1	Coprinellus	angulatus	CBS144469	{"clade": "Opisthokonta", "kingdom": "Fungi", "phylum": "Basidiomycota", "subphylum": "Agaricomycotina", "class": "Agaricomycetes", "subclass": "Agaricomycetidae", "order": "Agaricales", "family": "Psathyrellaceae", "subfamily": ""}	v1.0	jgi		Copang1	20210414	Steindorff AS et al.,2021
copcin1	Coprinopsis	cinerea	AmutBmutpab11	{"clade": "Opisthokonta", "kingdom": "Fungi", "phylum": "Basidiomycota", "subphylum": "Agaricomycotina", "class": "Agaricomycetes", "subclass": "Agaricomycetidae", "order": "Agaricales", "family": "Psathyrellaceae", "subfamily": ""}	v1.0	jgi		Copci_AmutBmut1	20210421	Muraguchi H et al.,2015
copcin2	Coprinopsis	cinerea	okayama7130	{"clade": "Opisthokonta", "kingdom": "Fungi", "phylum": "Basidiomycota", "subphylum": "Agaricomycotina", "class": "Agaricomycetes", "subclass": "Agaricomycetidae", "order": "Agaricales", "family": "Psathyrellaceae", "subfamily": ""}	2014-08-06 00:00:00	ncbi	copcin2	GCF_000182895.1	20210421	2003/07/30
copmar1	Coprinopsis	marcescibilis	CBS121175	{"clade": "Opisthokonta", "kingdom": "Fungi", "phylum": "Basidiomycota", "subphylum": "Agaricomycotina", "class": "Agaricomycetes", "subclass": "Agaricomycetidae", "order": "Agaricales", "family": "Psathyrellaceae", "subfamily": ""}	v1.0	jgi	2456581	Copmar1	20210414	Varga T et al.,2019
copmic1	Coprinellus	micaceus	FP101781	{"clade": "Opisthokonta", "kingdom": "Fungi", "phylum": "Basidiomycota", "subphylum": "Agaricomycotina", "class": "Agaricomycetes", "subclass": "Agaricomycetidae", "order": "Agaricales", "family": "Psathyrellaceae", "subfamily": ""}	v2.0	jgi		Copmic2	20210414	Varga T et al.,2019
copsp.1	Coprinopsis	sp.	MPIPUGEAT0042	{"clade": "Opisthokonta", "kingdom": "Fungi", "phylum": "Basidiomycota", "subphylum": "Agaricomycotina", "class": "Agaricomycetes", "subclass": "Agaricomycetidae", "order": "Agaricales", "family": "Psathyrellaceae", "subfamily": ""}	v1.0	jgi		Copph3	20210414	Mesny F et al.,2021
corcas1	Corynespora	cassiicola	CCP	{"clade": "dothideomyceta", "kingdom": "Fungi", "phylum": "Ascomycota", "subphylum": "Pezizomycotina", "class": "Dothideomycetes", "subclass": "Pleosporomycetidae", "order": "Pleosporales", "family": "Corynesporascaceae", "subfamily": ""}	v1.0	jgi		Corca1	20210421	Lopez D et al.,2018
corcas2.1	Corynespora	cassiicola	Philippines	{"clade": "dothideomyceta", "kingdom": "Fungi", "phylum": "Ascomycota", "subphylum": "Pezizomycotina", "class": "Dothideomycetes", "subclass": "Pleosporomycetidae", "order": "Pleosporales", "family": "Corynesporascaceae", "subfamily": ""}	2018-03-26 00:00:00	ncbi	corcas2	GCA_003016335.1	None	2018/03/26
corfum1	Cordyceps	fumosorosea	ARSEF2679	{"clade": "sordariomyceta", "kingdom": "Fungi", "phylum": "Ascomycota", "subphylum": "Pezizomycotina", "class": "Sordariomycetes", "subclass": "Hypocreomycetidae", "order": "Hypocreales", "family": "Cordycipitaceae", "subfamily": ""}	20160504	ncbi	SAMN04908328	GCF_001636725.1	20210414	2016/05/04
corgla1	Cortinarius	glaucopus	AT2004276	{"clade": "Opisthokonta", "kingdom": "Fungi", "phylum": "Basidiomycota", "subphylum": "Agaricomycotina", "class": "Agaricomycetes", "subclass": "Agaricomycetidae", "order": "Agaricales", "family": "Cortinariaceae", "subfamily": ""}	v2.0	jgi		Corgl3	20210414	Miyauchi S et al.,2020
corjav1.1	Cordyceps	javanica		{"clade": "sordariomyceta", "kingdom": "Fungi", "phylum": "Ascomycota", "subphylum": "Pezizomycotina", "class": "Sordariomycetes", "subclass": "Hypocreomycetidae", "order": "Hypocreales", "family": "Cordycipitaceae", "subfamily": ""}	20190715	ncbi	SAMN11249980	GCA_006981975.1	None	2019/07/15
corjav2.1	Cordyceps	javanica		{"clade": "sordariomyceta", "kingdom": "Fungi", "phylum": "Ascomycota", "subphylum": "Pezizomycotina", "class": "Sordariomycetes", "subclass": "Hypocreomycetidae", "order": "Hypocreales", "family": "Cordycipitaceae", "subfamily": ""}	20190715	ncbi	SAMN11244955	GCA_006981985.1	None	2019/07/15
cormil2.1	Cordyceps	militaris	CM01	{"clade": "sordariomyceta", "kingdom": "Fungi", "phylum": "Ascomycota", "subphylum": "Pezizomycotina", "class": "Sordariomycetes", "subclass": "Hypocreomycetidae", "order": "Hypocreales", "family": "Cordycipitaceae", "subfamily": ""}	n	slot	SAMN02981304	cormil2	None	True
cormil3.1	Cordyceps	militaris	ATCC34164	{"clade": "sordariomyceta", "kingdom": "Fungi", "phylum": "Ascomycota", "subphylum": "Pezizomycotina", "class": "Sordariomycetes", "subclass": "Hypocreomycetidae", "order": "Hypocreales", "family": "Cordycipitaceae", "subfamily": ""}	n	slot	SAMN05187187	cormil3	None	True
cormil4.1	Cordyceps	militaris	1	{"clade": "sordariomyceta", "kingdom": "Fungi", "phylum": "Ascomycota", "subphylum": "Pezizomycotina", "class": "Sordariomycetes", "subclass": "Hypocreomycetidae", "order": "Hypocreales", "family": "Cordycipitaceae", "subfamily": ""}	n	slot	SAMN05375011	cormil4	None	True
cormil5.1	Cordyceps	militaris	HN	{"clade": "sordariomyceta", "kingdom": "Fungi", "phylum": "Ascomycota", "subphylum": "Pezizomycotina", "class": "Sordariomycetes", "subclass": "Hypocreomycetidae", "order": "Hypocreales", "family": "Cordycipitaceae", "subfamily": ""}	n	slot		cormil5	None	True
cormil7.1	Cordyceps	militaris	Aloha	{"clade": "sordariomyceta", "kingdom": "Fungi", "phylum": "Ascomycota", "subphylum": "Pezizomycotina", "class": "Sordariomycetes", "subclass": "Hypocreomycetidae", "order": "Hypocreales", "family": "Cordycipitaceae", "subfamily": ""}	n	slot		cormil7	None	True
cormil8.1	Cordyceps	militaris	DG	{"clade": "sordariomyceta", "kingdom": "Fungi", "phylum": "Ascomycota", "subphylum": "Pezizomycotina", "class": "Sordariomycetes", "subclass": "Hypocreomycetidae", "order": "Hypocreales", "family": "Cordycipitaceae", "subfamily": ""}	n	slot		cormil8	None	True
corsp.1	Cordyceps	sp.	RAO2017	{"clade": "sordariomyceta", "kingdom": "Fungi", "phylum": "Ascomycota", "subphylum": "Pezizomycotina", "class": "Sordariomycetes", "subclass": "Hypocreomycetidae", "order": "Hypocreales", "family": "Cordycipitaceae", "subfamily": ""}	0	jgi		CorRAO_2017_1	20210414	de Bekker C et al.,2017
crafun1	Crassisporium	funariophilum	CBS144457	{"clade": "Opisthokonta", "kingdom": "Fungi", "phylum": "Basidiomycota", "subphylum": "Agaricomycotina", "class": "Agaricomycetes", "subclass": "Agaricomycetidae", "order": "Agaricales", "family": "Crassisporiaceae", "subfamily": ""}	v1.0	jgi		Crafun1	20210414	Steindorff AS et al.,2021
crevar1	Crepidotus	variabilis	CBS50695	{"clade": "Opisthokonta", "kingdom": "Fungi", "phylum": "Basidiomycota", "subphylum": "Agaricomycotina", "class": "Agaricomycetes", "subclass": "Agaricomycetidae", "order": "Agaricales", "family": "Crepidotaceae", "subfamily": ""}	v1.0	jgi		Crevar1	20210414	Ruiz-Dueñas FJ et al.,2021
croque1	Cronartium	quercuum	fspfusiformeG11	{"clade": "Opisthokonta", "kingdom": "Fungi", "phylum": "Basidiomycota", "subphylum": "Pucciniomycotina", "class": "Pucciniomycetes", "order": "Pucciniales", "family": "Coleosporiaceae", "subfamily": ""}	v1.0	jgi		Croqu1	20210414	Pendleton AL et al.,2014
crulae1	Crucibulum	laeve	CBS16637	{"clade": "Opisthokonta", "kingdom": "Fungi", "phylum": "Basidiomycota", "subphylum": "Agaricomycotina", "class": "Agaricomycetes", "subclass": "Agaricomycetidae", "order": "Agaricales", "family": "", "subfamily": ""}	v1.0	jgi		Crula1	20210414	Varga T et al.,2019
cryamy1	Cryptococcus	amylolentus	CBS6039	{"clade": "Opisthokonta", "kingdom": "Fungi", "phylum": "Basidiomycota", "subphylum": "Agaricomycotina", "class": "Tremellomycetes", "order": "Tremellales", "family": "Cryptococcaceae", "subfamily": ""}	0	jgi	791091	Cryam1	20210421	Sun S et al.,2017
cryamy2.1	Cryptococcus	amylolentus	CBS6273	{"clade": "Opisthokonta", "kingdom": "Fungi", "phylum": "Basidiomycota", "subphylum": "Agaricomycotina", "class": "Tremellomycetes", "order": "Tremellales", "family": "Cryptococcaceae", "subfamily": ""}	2016-09-06 00:00:00	ncbi	cryamy2	GCA_001720235.1	None	2016/09/06
crycf.1	Cryptococcus	cf.	gattii	{"clade": "Opisthokonta", "kingdom": "Fungi", "phylum": "Basidiomycota", "subphylum": "Agaricomycotina", "class": "Tremellomycetes", "order": "Tremellales", "family": "Cryptococcaceae", "subfamily": ""}	20191114	ncbi	SAMN09910472	GCA_009650685.1	20210414	2019/11/12
crycur1	Cryptococcus	curvatus	ATCC20509	{"clade": "Opisthokonta", "kingdom": "Fungi", "phylum": "Basidiomycota", "subphylum": "Agaricomycotina", "class": "Tremellomycetes", "order": "Tremellales", "family": "Cryptococcaceae", "subfamily": ""}	v1.0	jgi		Crycu1	20210414	Close D et al.,2016
crydep1.1	Cryptococcus	depauperatus	CBS7855	{"clade": "Opisthokonta", "kingdom": "Fungi", "phylum": "Basidiomycota", "subphylum": "Agaricomycotina", "class": "Tremellomycetes", "order": "Tremellales", "family": "Cryptococcaceae", "subfamily": ""}	20160906	ncbi	SAMN02086253	GCA_001720245.1	None	2016/09/06
crydep2.1	Cryptococcus	depauperatus	CBS7841	{"clade": "Opisthokonta", "kingdom": "Fungi", "phylum": "Basidiomycota", "subphylum": "Agaricomycotina", "class": "Tremellomycetes", "order": "Tremellales", "family": "Cryptococcaceae", "subfamily": ""}	20160906	ncbi	SAMN02086252	GCA_001720195.1	None	2016/09/06
cryflo1.1	Cryptococcus	floricola		{"clade": "Opisthokonta", "kingdom": "Fungi", "phylum": "Basidiomycota", "subphylum": "Agaricomycotina", "class": "Tremellomycetes", "order": "Tremellales", "family": "Cryptococcaceae", "subfamily": ""}	20200219	ncbi	SAMN06849074	GCA_008355005.1	None	2019/08/27
crygat10.1	Cryptococcus	gattii	VGIILA55	{"clade": "Opisthokonta", "kingdom": "Fungi", "phylum": "Basidiomycota", "subphylum": "Agaricomycotina", "class": "Tremellomycetes", "order": "Tremellales", "family": "Cryptococcaceae", "subfamily": ""}	2015-02-17 00:00:00	ncbi	crygat10	GCA_000836315.1	None	2015/02/10
crygat11.1	Cryptococcus	gattii	VGIICBS10090	{"clade": "Opisthokonta", "kingdom": "Fungi", "phylum": "Basidiomycota", "subphylum": "Agaricomycotina", "class": "Tremellomycetes", "order": "Tremellales", "family": "Cryptococcaceae", "subfamily": ""}	2015-02-17 00:00:00	ncbi	crygat11	GCA_000835765.1	None	2015/02/10
crygat12.1	Cryptococcus	gattii	EJB2	{"clade": "Opisthokonta", "kingdom": "Fungi", "phylum": "Basidiomycota", "subphylum": "Agaricomycotina", "class": "Tremellomycetes", "order": "Tremellales", "family": "Cryptococcaceae", "subfamily": ""}	2015-02-17 00:00:00	ncbi	crygat12	GCA_000835745.1	None	2015/02/10
crygat13.1	Cryptococcus	gattii	CA1280	{"clade": "Opisthokonta", "kingdom": "Fungi", "phylum": "Basidiomycota", "subphylum": "Agaricomycotina", "class": "Tremellomycetes", "order": "Tremellales", "family": "Cryptococcaceae", "subfamily": ""}	2015-02-17 00:00:00	ncbi	crygat13	GCA_000836335.1	None	2015/02/10
crygat14.1	Cryptococcus	gattii	VGIICA1014	{"clade": "Opisthokonta", "kingdom": "Fungi", "phylum": "Basidiomycota", "subphylum": "Agaricomycotina", "class": "Tremellomycetes", "order": "Tremellales", "family": "Cryptococcaceae", "subfamily": ""}	2015-02-17 00:00:00	ncbi	crygat14	GCA_000875795.1	None	2015/02/10
crygat15.1	Cryptococcus	gattii	Ru294	{"clade": "Opisthokonta", "kingdom": "Fungi", "phylum": "Basidiomycota", "subphylum": "Agaricomycotina", "class": "Tremellomycetes", "order": "Tremellales", "family": "Cryptococcaceae", "subfamily": ""}	2015-02-17 00:00:00	ncbi	crygat15	GCA_000836355.1	None	2015/02/10
crygat16.1	Cryptococcus	gattii	VGIIMMRL2647	{"clade": "Opisthokonta", "kingdom": "Fungi", "phylum": "Basidiomycota", "subphylum": "Agaricomycotina", "class": "Tremellomycetes", "order": "Tremellales", "family": "Cryptococcaceae", "subfamily": ""}	2015-02-17 00:00:00	ncbi	crygat16	GCA_000875855.1	None	2015/02/10
crygat17.1	Cryptococcus	gattii	VGIIRam5	{"clade": "Opisthokonta", "kingdom": "Fungi", "phylum": "Basidiomycota", "subphylum": "Agaricomycotina", "class": "Tremellomycetes", "order": "Tremellales", "family": "Cryptococcaceae", "subfamily": ""}	2015-02-17 00:00:00	ncbi	crygat17	GCA_000836375.1	None	2015/02/10
crygat2	Cryptococcus	gattii	VGII20019351	{"clade": "Opisthokonta", "kingdom": "Fungi", "phylum": "Basidiomycota", "subphylum": "Agaricomycotina", "class": "Tremellomycetes", "order": "Tremellales", "family": "Cryptococcaceae", "subfamily": ""}	0	jgi		CgaVGII_1	20210414	Farrer RA et al.,2015
crygat3	Cryptococcus	gattii	VGIVIND107	{"clade": "Opisthokonta", "kingdom": "Fungi", "phylum": "Basidiomycota", "subphylum": "Agaricomycotina", "class": "Tremellomycetes", "order": "Tremellales", "family": "Cryptococcaceae", "subfamily": ""}	0	jgi		CgaVGIV_1	20210414	Farrer RA et al.,2015
crygat4	Cryptococcus	gattii	CA1873	{"clade": "Opisthokonta", "kingdom": "Fungi", "phylum": "Basidiomycota", "subphylum": "Agaricomycotina", "class": "Tremellomycetes", "order": "Tremellales", "family": "Cryptococcaceae", "subfamily": ""}	0	jgi	272061	CgaCA1873_1	20210414	Farrer RA et al.,2015
crygat5	Cryptococcus	gattii	WM276	{"clade": "Opisthokonta", "kingdom": "Fungi", "phylum": "Basidiomycota", "subphylum": "Agaricomycotina", "class": "Tremellomycetes", "order": "Tremellales", "family": "Cryptococcaceae", "subfamily": ""}	0	jgi		CgaWM276_1	20210421	D'Souza CA et al.,2011
crygat6.1	Cryptococcus	gattii	VGIIR265	{"clade": "Opisthokonta", "kingdom": "Fungi", "phylum": "Basidiomycota", "subphylum": "Agaricomycotina", "class": "Tremellomycetes", "order": "Tremellales", "family": "Cryptococcaceae", "subfamily": ""}	2020-12-17 00:00:00	ncbi	crygat6	GCA_002954075.1	None	2018/02/27
crygat7.1	Cryptococcus	gattii	NT10	{"clade": "Opisthokonta", "kingdom": "Fungi", "phylum": "Basidiomycota", "subphylum": "Agaricomycotina", "class": "Tremellomycetes", "order": "Tremellales", "family": "Cryptococcaceae", "subfamily": ""}	2015-03-05 00:00:00	ncbi	crygat7	GCA_000935105.1	None	2015/02/10
crygat8.1	Cryptococcus	gattii	E566	{"clade": "Opisthokonta", "kingdom": "Fungi", "phylum": "Basidiomycota", "subphylum": "Agaricomycotina", "class": "Tremellomycetes", "order": "Tremellales", "family": "Cryptococcaceae", "subfamily": ""}	2015-02-26 00:00:00	ncbi	crygat8	GCA_000875815.1	None	2015/02/10
crygat9.1	Cryptococcus	gattii	VGII99473	{"clade": "Opisthokonta", "kingdom": "Fungi", "phylum": "Basidiomycota", "subphylum": "Agaricomycotina", "class": "Tremellomycetes", "order": "Tremellales", "family": "Cryptococcaceae", "subfamily": ""}	2015-02-26 00:00:00	ncbi	crygat9	GCA_000836455.1	None	2015/02/10
crymin1.1	Cryomyces	minteri		{"clade": "dothideomyceta", "kingdom": "Fungi", "phylum": "Ascomycota", "subphylum": "Pezizomycotina", "class": "Dothideomycetes", "order": "", "family": "", "subfamily": ""}	20190502	ncbi	SAMN06285183	GCA_005059845.1	None	2019/05/02
cryneo1	Cryptococcus	neoformans	varneoformansJEC21	{"clade": "Opisthokonta", "kingdom": "Fungi", "phylum": "Basidiomycota", "subphylum": "Agaricomycotina", "class": "Tremellomycetes", "order": "Tremellales", "family": "Cryptococcaceae", "subfamily": ""}	0	jgi	256138	Cryne_JEC21_1	20210421	Loftus BJ et al.,2005
cryneo10	Cryptococcus	neoformans	vargrubii	{"clade": "Opisthokonta", "kingdom": "Fungi", "phylum": "Basidiomycota", "subphylum": "Agaricomycotina", "class": "Tremellomycetes", "order": "Tremellales", "family": "Cryptococcaceae", "subfamily": ""}	2017-07-20 00:00:00	ncbi	cryneo10	GCA_002222095.1	20210421	2017/07/20
cryneo11	Cryptococcus	neoformans	vargrubiiBt15	{"clade": "Opisthokonta", "kingdom": "Fungi", "phylum": "Basidiomycota", "subphylum": "Agaricomycotina", "class": "Tremellomycetes", "order": "Tremellales", "family": "Cryptococcaceae", "subfamily": ""}	2017-07-20 00:00:00	ncbi	cryneo11	GCA_002222335.1	20210421	2017/07/20
cryneo12	Cryptococcus	neoformans	vargrubiiA21025	{"clade": "Opisthokonta", "kingdom": "Fungi", "phylum": "Basidiomycota", "subphylum": "Agaricomycotina", "class": "Tremellomycetes", "order": "Tremellales", "family": "Cryptococcaceae", "subfamily": ""}	2017-07-20 00:00:00	ncbi	cryneo12	GCA_002222375.1	20210421	2017/07/20
cryneo13	Cryptococcus	neoformans	vargrubiiTu4011	{"clade": "Opisthokonta", "kingdom": "Fungi", "phylum": "Basidiomycota", "subphylum": "Agaricomycotina", "class": "Tremellomycetes", "order": "Tremellales", "family": "Cryptococcaceae", "subfamily": ""}	2017-07-20 00:00:00	ncbi	cryneo13	GCA_002222475.1	20210421	2017/07/20
cryneo14	Cryptococcus	neoformans	vargrubii	{"clade": "Opisthokonta", "kingdom": "Fungi", "phylum": "Basidiomycota", "subphylum": "Agaricomycotina", "class": "Tremellomycetes", "order": "Tremellales", "family": "Cryptococcaceae", "subfamily": ""}	2017-07-20 00:00:00	ncbi	cryneo14	GCA_002222025.1	20210421	2017/07/20
cryneo15	Cryptococcus	neoformans	vargrubii	{"clade": "Opisthokonta", "kingdom": "Fungi", "phylum": "Basidiomycota", "subphylum": "Agaricomycotina", "class": "Tremellomycetes", "order": "Tremellales", "family": "Cryptococcaceae", "subfamily": ""}	2017-07-20 00:00:00	ncbi	cryneo15	GCA_002222115.1	20210421	2017/07/20
cryneo16	Cryptococcus	neoformans	vargrubiiCHC193	{"clade": "Opisthokonta", "kingdom": "Fungi", "phylum": "Basidiomycota", "subphylum": "Agaricomycotina", "class": "Tremellomycetes", "order": "Tremellales", "family": "Cryptococcaceae", "subfamily": ""}	2017-07-20 00:00:00	ncbi	cryneo16	GCA_002222295.1	20210421	2017/07/20
cryneo17	Cryptococcus	neoformans	vargrubiiD171	{"clade": "Opisthokonta", "kingdom": "Fungi", "phylum": "Basidiomycota", "subphylum": "Agaricomycotina", "class": "Tremellomycetes", "order": "Tremellales", "family": "Cryptococcaceae", "subfamily": ""}	2017-07-20 00:00:00	ncbi	cryneo17	GCA_002222255.1	20210421	2017/07/20
cryneo18	Cryptococcus	neoformans	vargrubiiTu2591	{"clade": "Opisthokonta", "kingdom": "Fungi", "phylum": "Basidiomycota", "subphylum": "Agaricomycotina", "class": "Tremellomycetes", "order": "Tremellales", "family": "Cryptococcaceae", "subfamily": ""}	2017-07-20 00:00:00	ncbi	cryneo18	GCA_002222325.1	20210421	2017/07/20
cryneo19	Cryptococcus	neoformans	vargrubiiTh84	{"clade": "Opisthokonta", "kingdom": "Fungi", "phylum": "Basidiomycota", "subphylum": "Agaricomycotina", "class": "Tremellomycetes", "order": "Tremellales", "family": "Cryptococcaceae", "subfamily": ""}	2017-07-20 00:00:00	ncbi	cryneo19	GCA_002222315.1	20210421	2017/07/20
cryneo2	Cryptococcus	neoformans	vargrubii	{"clade": "Opisthokonta", "kingdom": "Fungi", "phylum": "Basidiomycota", "subphylum": "Agaricomycotina", "class": "Tremellomycetes", "order": "Tremellales", "family": "Cryptococcaceae", "subfamily": ""}	2018-11-08 00:00:00	ncbi	cryneo2	GCA_002216725.1	20210421	2017/07/12
cryneo20	Cryptococcus	neoformans	vargrubii	{"clade": "Opisthokonta", "kingdom": "Fungi", "phylum": "Basidiomycota", "subphylum": "Agaricomycotina", "class": "Tremellomycetes", "order": "Tremellales", "family": "Cryptococcaceae", "subfamily": ""}	2017-07-20 00:00:00	ncbi	cryneo20	GCA_002222155.1	20210421	2017/07/20
cryneo21	Cryptococcus	neoformans	vargrubiiA1358	{"clade": "Opisthokonta", "kingdom": "Fungi", "phylum": "Basidiomycota", "subphylum": "Agaricomycotina", "class": "Tremellomycetes", "order": "Tremellales", "family": "Cryptococcaceae", "subfamily": ""}	2017-07-20 00:00:00	ncbi	cryneo21	GCA_002221985.1	20210421	2017/07/20
cryneo22	Cryptococcus	neoformans	vargrubii	{"clade": "Opisthokonta", "kingdom": "Fungi", "phylum": "Basidiomycota", "subphylum": "Agaricomycotina", "class": "Tremellomycetes", "order": "Tremellales", "family": "Cryptococcaceae", "subfamily": ""}	2017-07-20 00:00:00	ncbi	cryneo22	GCA_002222135.1	20210421	2017/07/20
cryneo23	Cryptococcus	neoformans	vargrubiiMWRSA36	{"clade": "Opisthokonta", "kingdom": "Fungi", "phylum": "Basidiomycota", "subphylum": "Agaricomycotina", "class": "Tremellomycetes", "order": "Tremellales", "family": "Cryptococcaceae", "subfamily": ""}	2017-07-20 00:00:00	ncbi	cryneo23	GCA_002222395.1	20210421	2017/07/20
cryneo24	Cryptococcus	neoformans	vargrubii	{"clade": "Opisthokonta", "kingdom": "Fungi", "phylum": "Basidiomycota", "subphylum": "Agaricomycotina", "class": "Tremellomycetes", "order": "Tremellales", "family": "Cryptococcaceae", "subfamily": ""}	2017-07-20 00:00:00	ncbi	cryneo24	GCA_002222245.1	20210421	2017/07/20
cryneo25	Cryptococcus	neoformans	vargrubii	{"clade": "Opisthokonta", "kingdom": "Fungi", "phylum": "Basidiomycota", "subphylum": "Agaricomycotina", "class": "Tremellomycetes", "order": "Tremellales", "family": "Cryptococcaceae", "subfamily": ""}	2017-07-20 00:00:00	ncbi	cryneo25	GCA_002222015.1	20210421	2017/07/20
cryneo26	Cryptococcus	neoformans	vargrubii	{"clade": "Opisthokonta", "kingdom": "Fungi", "phylum": "Basidiomycota", "subphylum": "Agaricomycotina", "class": "Tremellomycetes", "order": "Tremellales", "family": "Cryptococcaceae", "subfamily": ""}	2017-07-20 00:00:00	ncbi	cryneo26	GCA_002222145.1	20210421	2017/07/20
cryneo27	Cryptococcus	neoformans	vargrubii	{"clade": "Opisthokonta", "kingdom": "Fungi", "phylum": "Basidiomycota", "subphylum": "Agaricomycotina", "class": "Tremellomycetes", "order": "Tremellales", "family": "Cryptococcaceae", "subfamily": ""}	2017-07-20 00:00:00	ncbi	cryneo27	GCA_002222165.1	20210421	2017/07/20
cryneo28	Cryptococcus	neoformans	vargrubiic8	{"clade": "Opisthokonta", "kingdom": "Fungi", "phylum": "Basidiomycota", "subphylum": "Agaricomycotina", "class": "Tremellomycetes", "order": "Tremellales", "family": "Cryptococcaceae", "subfamily": ""}	2017-07-20 00:00:00	ncbi	cryneo28	GCA_002222405.1	20210421	2017/07/20
cryneo29	Cryptococcus	neoformans	vargrubiiAD17a	{"clade": "Opisthokonta", "kingdom": "Fungi", "phylum": "Basidiomycota", "subphylum": "Agaricomycotina", "class": "Tremellomycetes", "order": "Tremellales", "family": "Cryptococcaceae", "subfamily": ""}	2017-07-17 00:00:00	ncbi	cryneo29	GCA_002220445.1	20210421	2017/07/17
cryneo3	Cryptococcus	neoformans	vargrubiiBt63	{"clade": "Opisthokonta", "kingdom": "Fungi", "phylum": "Basidiomycota", "subphylum": "Agaricomycotina", "class": "Tremellomycetes", "order": "Tremellales", "family": "Cryptococcaceae", "subfamily": ""}	2017-07-27 00:00:00	ncbi	cryneo3	GCA_002234625.1	20210421	2017/07/27
cryneo30	Cryptococcus	neoformans	vargrubiiMWRSA852	{"clade": "Opisthokonta", "kingdom": "Fungi", "phylum": "Basidiomycota", "subphylum": "Agaricomycotina", "class": "Tremellomycetes", "order": "Tremellales", "family": "Cryptococcaceae", "subfamily": ""}	2017-07-17 00:00:00	ncbi	cryneo30	GCA_002220035.1	20210421	2017/07/17
cryneo31	Cryptococcus	neoformans	vargrubii	{"clade": "Opisthokonta", "kingdom": "Fungi", "phylum": "Basidiomycota", "subphylum": "Agaricomycotina", "class": "Tremellomycetes", "order": "Tremellales", "family": "Cryptococcaceae", "subfamily": ""}	2017-07-17 00:00:00	ncbi	cryneo31	GCA_002220045.1	20210421	2017/07/17
cryneo32	Cryptococcus	neoformans	vargrubii	{"clade": "Opisthokonta", "kingdom": "Fungi", "phylum": "Basidiomycota", "subphylum": "Agaricomycotina", "class": "Tremellomycetes", "order": "Tremellales", "family": "Cryptococcaceae", "subfamily": ""}	2017-07-13 00:00:00	ncbi	cryneo32	GCA_002217545.1	20210421	2017/07/13
cryneo33	Cryptococcus	neoformans	vargrubiiAD183a	{"clade": "Opisthokonta", "kingdom": "Fungi", "phylum": "Basidiomycota", "subphylum": "Agaricomycotina", "class": "Tremellomycetes", "order": "Tremellales", "family": "Cryptococcaceae", "subfamily": ""}	2017-07-07 00:00:00	ncbi	cryneo33	GCA_002215765.1	20210421	2017/07/07
cryneo34	Cryptococcus	neoformans	vargrubii	{"clade": "Opisthokonta", "kingdom": "Fungi", "phylum": "Basidiomycota", "subphylum": "Agaricomycotina", "class": "Tremellomycetes", "order": "Tremellales", "family": "Cryptococcaceae", "subfamily": ""}	2017-07-07 00:00:00	ncbi	cryneo34	GCA_002215755.1	20210421	2017/07/07
cryneo35	Cryptococcus	neoformans	vargrubiiBt1	{"clade": "Opisthokonta", "kingdom": "Fungi", "phylum": "Basidiomycota", "subphylum": "Agaricomycotina", "class": "Tremellomycetes", "order": "Tremellales", "family": "Cryptococcaceae", "subfamily": ""}	2017-07-07 00:00:00	ncbi	cryneo35	GCA_002215705.1	20210421	2017/06/27
cryneo36	Cryptococcus	neoformans	vargrubiiBt85	{"clade": "Opisthokonta", "kingdom": "Fungi", "phylum": "Basidiomycota", "subphylum": "Agaricomycotina", "class": "Tremellomycetes", "order": "Tremellales", "family": "Cryptococcaceae", "subfamily": ""}	2017-07-07 00:00:00	ncbi	cryneo36	GCA_002215835.1	20210421	2017/07/07
cryneo37	Cryptococcus	neoformans	vargrubii12591	{"clade": "Opisthokonta", "kingdom": "Fungi", "phylum": "Basidiomycota", "subphylum": "Agaricomycotina", "class": "Tremellomycetes", "order": "Tremellales", "family": "Cryptococcaceae", "subfamily": ""}	2017-07-07 00:00:00	ncbi	cryneo37	GCA_002215885.1	20210421	2017/07/07
cryneo38	Cryptococcus	neoformans	vargrubiic45	{"clade": "Opisthokonta", "kingdom": "Fungi", "phylum": "Basidiomycota", "subphylum": "Agaricomycotina", "class": "Tremellomycetes", "order": "Tremellales", "family": "Cryptococcaceae", "subfamily": ""}	2017-07-07 00:00:00	ncbi	cryneo38	GCA_002215855.1	20210421	2017/07/07
cryneo39	Cryptococcus	neoformans	vargrubii	{"clade": "Opisthokonta", "kingdom": "Fungi", "phylum": "Basidiomycota", "subphylum": "Agaricomycotina", "class": "Tremellomycetes", "order": "Tremellales", "family": "Cryptococcaceae", "subfamily": ""}	2017-07-07 00:00:00	ncbi	cryneo39	GCA_002215745.1	20210421	2017/07/07
cryneo4	Cryptococcus	neoformans	vargrubiiGb118	{"clade": "Opisthokonta", "kingdom": "Fungi", "phylum": "Basidiomycota", "subphylum": "Agaricomycotina", "class": "Tremellomycetes", "order": "Tremellales", "family": "Cryptococcaceae", "subfamily": ""}	2017-07-24 00:00:00	ncbi	cryneo4	GCA_002224005.1	20210421	2017/07/24
cryneo40	Cryptococcus	neoformans	vargrubiiAD260a	{"clade": "Opisthokonta", "kingdom": "Fungi", "phylum": "Basidiomycota", "subphylum": "Agaricomycotina", "class": "Tremellomycetes", "order": "Tremellales", "family": "Cryptococcaceae", "subfamily": ""}	2017-07-07 00:00:00	ncbi	cryneo40	GCA_002215775.1	20210421	2017/07/07
cryneo41	Cryptococcus	neoformans	vargrubiiC23	{"clade": "Opisthokonta", "kingdom": "Fungi", "phylum": "Basidiomycota", "subphylum": "Agaricomycotina", "class": "Tremellomycetes", "order": "Tremellales", "family": "Cryptococcaceae", "subfamily": ""}	2017-07-07 00:00:00	ncbi	cryneo41	GCA_002215825.1	20210421	2017/07/07
cryneo42.1	Cryptococcus	neoformans	varneoformansB3501A	{"clade": "Opisthokonta", "kingdom": "Fungi", "phylum": "Basidiomycota", "subphylum": "Agaricomycotina", "class": "Tremellomycetes", "order": "Tremellales", "family": "Cryptococcaceae", "subfamily": ""}	2014-08-06 00:00:00	ncbi	cryneo42	GCF_000149385.1	None	2004/07/13
cryneo5	Cryptococcus	neoformans	vargrubiiMWRSA1955	{"clade": "Opisthokonta", "kingdom": "Fungi", "phylum": "Basidiomycota", "subphylum": "Agaricomycotina", "class": "Tremellomycetes", "order": "Tremellales", "family": "Cryptococcaceae", "subfamily": ""}	2017-07-20 00:00:00	ncbi	cryneo5	GCA_002222455.1	20210421	2017/07/20
cryneo6	Cryptococcus	neoformans	vargrubiiA53517	{"clade": "Opisthokonta", "kingdom": "Fungi", "phylum": "Basidiomycota", "subphylum": "Agaricomycotina", "class": "Tremellomycetes", "order": "Tremellales", "family": "Cryptococcaceae", "subfamily": ""}	2017-07-20 00:00:00	ncbi	cryneo6	GCA_002222215.1	20210421	2017/07/20
cryneo7	Cryptococcus	neoformans	vargrubiiZe901	{"clade": "Opisthokonta", "kingdom": "Fungi", "phylum": "Basidiomycota", "subphylum": "Agaricomycotina", "class": "Tremellomycetes", "order": "Tremellales", "family": "Cryptococcaceae", "subfamily": ""}	2017-07-20 00:00:00	ncbi	cryneo7	GCA_002222385.1	20210421	2017/07/20
cryneo8	Cryptococcus	neoformans	vargrubiiBt120	{"clade": "Opisthokonta", "kingdom": "Fungi", "phylum": "Basidiomycota", "subphylum": "Agaricomycotina", "class": "Tremellomycetes", "order": "Tremellales", "family": "Cryptococcaceae", "subfamily": ""}	2017-07-20 00:00:00	ncbi	cryneo8	GCA_002222465.1	20210421	2017/07/20
cryneo9	Cryptococcus	neoformans	vargrubiiBr795	{"clade": "Opisthokonta", "kingdom": "Fungi", "phylum": "Basidiomycota", "subphylum": "Agaricomycotina", "class": "Tremellomycetes", "order": "Tremellales", "family": "Cryptococcaceae", "subfamily": ""}	2017-07-20 00:00:00	ncbi	cryneo9	GCA_002222225.1	20210421	2017/07/20
crypar1.1	Cryphonectria	parasitica	EP155	{"clade": "sordariomyceta", "kingdom": "Fungi", "phylum": "Ascomycota", "subphylum": "Pezizomycotina", "class": "Sordariomycetes", "subclass": "Sordariomycetidae", "order": "Diaporthales", "family": "Cryphonectriaceae", "subfamily": ""}	20200326	ncbi	SAMN02744051	GCF_011745365.1	None	2020/03/25
cryter1	Cryptococcus	terricola	JCM24523	{"clade": "Opisthokonta", "kingdom": "Fungi", "phylum": "Basidiomycota", "subphylum": "Agaricomycotina", "class": "Tremellomycetes", "order": "Tremellales", "family": "Cryptococcaceae", "subfamily": ""}	v1.0	jgi		Cryte1	20210414	Close D et al.,2016
crywin1	Cryptococcus	wingfieldii	CBS7118	{"clade": "Opisthokonta", "kingdom": "Fungi", "phylum": "Basidiomycota", "subphylum": "Agaricomycotina", "class": "Tremellomycetes", "order": "Tremellales", "family": "Cryptococcaceae", "subfamily": ""}	0	jgi		Tsuwi1	20210414	Passer AR et al.,2019
cucber1	Cucurbitaria	berberidis	CBS39484	{"clade": "dothideomyceta", "kingdom": "Fungi", "phylum": "Ascomycota", "subphylum": "Pezizomycotina", "class": "Dothideomycetes", "subclass": "Pleosporomycetidae", "order": "Pleosporales", "suborder": "Pleosporineae", "family": "Cucurbitariaceae", "subfamily": ""}	v1.0	jgi		Cucbe1	20210414	Haridas S et al.,2020
cudaci1	Cudoniella	acicularis		{"clade": "sordariomyceta", "kingdom": "Fungi", "phylum": "Ascomycota", "subphylum": "Pezizomycotina", "class": "Leotiomycetes", "order": "Helotiales", "family": "Helotiaceae", "subfamily": ""}	20200512	ncbi	SAMN14256398	GCA_013054445.1	20210414	2020/05/12
curkus1.1	Curvularia	kusanoi		{"clade": "dothideomyceta", "kingdom": "Fungi", "phylum": "Ascomycota", "subphylum": "Pezizomycotina", "class": "Dothideomycetes", "subclass": "Pleosporomycetidae", "order": "Pleosporales", "suborder": "Pleosporineae", "family": "Pleosporaceae", "subfamily": ""}	20200303	ncbi	SAMN11403615	GCA_011058905.1	None	2020/03/03
cutole1.1	Cutaneotrichosporon	oleaginosum		{"clade": "Opisthokonta", "kingdom": "Fungi", "phylum": "Basidiomycota", "subphylum": "Agaricomycotina", "class": "Tremellomycetes", "order": "Trichosporonales", "family": "Trichosporonaceae", "subfamily": ""}	20150624	ncbi	SAMN02744832	GCF_001027345.1	None	2015/06/11
cutole2	Cutaneotrichosporon	oleaginosum		{"clade": "Opisthokonta", "kingdom": "Fungi", "phylum": "Basidiomycota", "subphylum": "Agaricomycotina", "class": "Tremellomycetes", "order": "Trichosporonales", "family": "Trichosporonaceae", "subfamily": ""}	20190909	ncbi	SAMN09399338	GCA_008065305.1	20210414	2019/08/22
cyastr1	Cyathus	striatus	AH40144	{"clade": "Opisthokonta", "kingdom": "Fungi", "phylum": "Basidiomycota", "subphylum": "Agaricomycotina", "class": "Agaricomycetes", "subclass": "Agaricomycetidae", "order": "Agaricales", "family": "Nidulariaceae", "subfamily": ""}	v1.0	jgi		Cyastr2	20210414	Ruiz-Dueñas FJ et al.,2021
cybfab1	Cyberlindnera	fabianii	65	{"clade": "saccharomyceta", "kingdom": "Fungi", "phylum": "Ascomycota", "subphylum": "Saccharomycotina", "class": "Saccharomycetes", "order": "Saccharomycetales", "family": "Phaffomycetaceae", "subfamily": ""}	0	jgi	969021	Cybfa1	20210414	van Rijswijck IM et al.,2017
cybjad1	Cyberlindnera	jadinii	NRRLY1542	{"clade": "saccharomyceta", "kingdom": "Fungi", "phylum": "Ascomycota", "subphylum": "Saccharomycotina", "class": "Saccharomycetes", "order": "Saccharomycetales", "family": "Phaffomycetaceae", "subfamily": ""}	v1.0	jgi	796241	Cybja1	20210414	Riley R et al.,2016
cylhub1	Cylindrodendrum	hubeiense		{"clade": "sordariomyceta", "kingdom": "Fungi", "phylum": "Ascomycota", "subphylum": "Pezizomycotina", "class": "Sordariomycetes", "subclass": "Hypocreomycetidae", "order": "Hypocreales", "family": "Nectriaceae", "subfamily": ""}	20200917	ncbi	SAMN14258020	GCA_014621425.1	20210414	2020/09/17
cyloli1	Cylindrocarpon	olidum	MPICAGECH0241	{"clade": "sordariomyceta", "kingdom": "Fungi", "phylum": "Ascomycota", "subphylum": "Pezizomycotina", "class": "Sordariomycetes", "subclass": "Hypocreomycetidae", "order": "Hypocreales", "family": "Nectriaceae", "subfamily": ""}	v1.0	jgi		Cylol1	20210414	Mesny F et al.,2021
cyltor1	Cylindrobasidium	torrendii	FP15055	{"clade": "Opisthokonta", "kingdom": "Fungi", "phylum": "Basidiomycota", "subphylum": "Agaricomycotina", "class": "Agaricomycetes", "subclass": "Agaricomycetidae", "order": "Agaricales", "family": "Physalacriaceae", "subfamily": ""}	v1.0	jgi		Cylto1	20210421	Floudas D et al.,2015
cypeur1	Cyphellophora	europaea	CBS101466	{"clade": "leotiomyceta", "kingdom": "Fungi", "phylum": "Ascomycota", "subphylum": "Pezizomycotina", "class": "Eurotiomycetes", "subclass": "Chaetothyriomycetidae", "order": "Chaetothyriales", "family": "Cyphellophoraceae", "subfamily": ""}	0	jgi	85991	Cypeu1	20210414	Teixeira MM et al.,2017
cysmin1	Cystobasidium	minutum	MCA4210	{"clade": "Opisthokonta", "kingdom": "Fungi", "phylum": "Basidiomycota", "subphylum": "Pucciniomycotina", "class": "Cystobasidiomycetes", "order": "Cystobasidiales", "family": "Cystobasidiaceae", "subfamily": ""}	v1.0	jgi		Rhomi1	20210414	Camiolo S et al.,2019
cytleu1	Cytospora	leucostoma		{"clade": "sordariomyceta", "kingdom": "Fungi", "phylum": "Ascomycota", "subphylum": "Pezizomycotina", "class": "Sordariomycetes", "subclass": "Sordariomycetidae", "order": "Diaporthales", "family": "Valsaceae", "subfamily": ""}	20181119	ncbi	SAMN04099706	GCA_003795295.1	20210414	2018/11/19
cytmel1	Cytidiella	melzeri	FP102339	{"clade": "Opisthokonta", "kingdom": "Fungi", "phylum": "Basidiomycota", "subphylum": "Agaricomycotina", "class": "Agaricomycetes", "order": "Polyporales", "family": "Irpicaceae", "subfamily": ""}	v1.0	jgi		Cytmel1	20210414	Hage H et al.,2021
daccio1	Dactylellina	cionopaga		{"clade": "saccharomyceta", "kingdom": "Fungi", "phylum": "Ascomycota", "subphylum": "Pezizomycotina", "class": "Orbiliomycetes", "order": "Orbiliales", "family": "Orbiliaceae", "subfamily": ""}	20200408	ncbi	SAMN03658144	GCA_012184355.1	20210414	2020/04/08
daccyl1	Dactylella	cylindrospora		{"clade": "saccharomyceta", "kingdom": "Fungi", "phylum": "Ascomycota", "subphylum": "Pezizomycotina", "class": "Orbiliomycetes", "order": "Orbiliales", "family": "Orbiliaceae", "subfamily": ""}	20200408	ncbi	SAMN03658149	GCA_012184295.1	20210414	2020/04/08
dacest1	Dactylonectria	estremocensis	MPICAGEAT0021	{"clade": "sordariomyceta", "kingdom": "Fungi", "phylum": "Ascomycota", "subphylum": "Pezizomycotina", "class": "Sordariomycetes", "subclass": "Hypocreomycetidae", "order": "Hypocreales", "family": "Nectriaceae", "subfamily": ""}	v1.0	jgi		Daces1	20210414	Mesny F et al.,2021
dachap1	Dactylellina	haptotyla	CBS20050	{"clade": "saccharomyceta", "kingdom": "Fungi", "phylum": "Ascomycota", "subphylum": "Pezizomycotina", "class": "Orbiliomycetes", "order": "Orbiliales", "family": "Orbiliaceae", "subfamily": ""}	20140811	ncbi	SAMN02981526	GCF_000441935.1	20210414	2013/07/23
dacmac1	Dactylonectria	macrodidyma	MPICAGEAT0147	{"clade": "sordariomyceta", "kingdom": "Fungi", "phylum": "Ascomycota", "subphylum": "Pezizomycotina", "class": "Sordariomycetes", "subclass": "Hypocreomycetidae", "order": "Hypocreales", "family": "Nectriaceae", "subfamily": ""}	v1.0	jgi		Dacma1	20210414	Mesny F et al.,2021
dacpri1	Dacryopinax	primogenitus	DJM731SSP1	{"clade": "Opisthokonta", "kingdom": "Fungi", "phylum": "Basidiomycota", "subphylum": "Agaricomycotina", "class": "Dacrymycetes", "order": "Dacrymycetales", "family": "Dacrymycetaceae", "subfamily": ""}	v1.0	jgi		Dacsp1	20210414	Floudas D et al.,2012
dalbam1	Daldinia	bambusicola	CBS122872	{"clade": "sordariomyceta", "kingdom": "Fungi", "phylum": "Ascomycota", "subphylum": "Pezizomycotina", "class": "Sordariomycetes", "subclass": "Xylariomycetidae", "order": "Xylariales", "family": "Hypoxylaceae", "subfamily": ""}	v1.0	jgi		Dalba1	20210414	Franco MEE et al.,2022
dalcal1	Daldinia	caldariorum	CBS122874	{"clade": "sordariomyceta", "kingdom": "Fungi", "phylum": "Ascomycota", "subphylum": "Pezizomycotina", "class": "Sordariomycetes", "subclass": "Xylariomycetidae", "order": "Xylariales", "family": "Hypoxylaceae", "subfamily": ""}	v1.0	jgi		Dalcal1	20210414	Franco MEE et al.,2022
dalchi1	Daldinia	childiae		{"clade": "sordariomyceta", "kingdom": "Fungi", "phylum": "Ascomycota", "subphylum": "Pezizomycotina", "class": "Sordariomycetes", "subclass": "Xylariomycetidae", "order": "Xylariales", "family": "Hypoxylaceae", "subfamily": ""}	20200306	ncbi	SAMN12777271	GCF_008694065.1	20210414	2019/09/25
daldec1	Daldinia	decipiens	CBS113046	{"clade": "sordariomyceta", "kingdom": "Fungi", "phylum": "Ascomycota", "subphylum": "Pezizomycotina", "class": "Sordariomycetes", "subclass": "Xylariomycetidae", "order": "Xylariales", "family": "Hypoxylaceae", "subfamily": ""}	v1.0	jgi		Daldec1	20210414	Franco MEE et al.,2022
dalesc1	Daldinia	eschscholtzii	FL0578	{"clade": "sordariomyceta", "kingdom": "Fungi", "phylum": "Ascomycota", "subphylum": "Pezizomycotina", "class": "Sordariomycetes", "subclass": "Xylariomycetidae", "order": "Xylariales", "family": "Hypoxylaceae", "subfamily": ""}	v1.0	jgi		Dales1	20210414	Franco MEE et al.,2022
dalesc2	Daldinia	eschscholtzii	EC12	{"clade": "sordariomyceta", "kingdom": "Fungi", "phylum": "Ascomycota", "subphylum": "Pezizomycotina", "class": "Sordariomycetes", "subclass": "Xylariomycetidae", "order": "Xylariales", "family": "Hypoxylaceae", "subfamily": ""}	v1.0	jgi		DalEC12_1	20210414	Wu W et al.,2017
dalgra1	Daldinia	grandis	CBS114736	{"clade": "sordariomyceta", "kingdom": "Fungi", "phylum": "Ascomycota", "subphylum": "Pezizomycotina", "class": "Sordariomycetes", "subclass": "Xylariomycetidae", "order": "Xylariales", "family": "Hypoxylaceae", "subfamily": ""}	v1.0	jgi		Dalgra1	20210414	Franco MEE et al.,2022
dalloc2	Daldinia	loculata	AZ0526	{"clade": "sordariomyceta", "kingdom": "Fungi", "phylum": "Ascomycota", "subphylum": "Pezizomycotina", "class": "Sordariomycetes", "subclass": "Xylariomycetidae", "order": "Xylariales", "family": "Hypoxylaceae", "subfamily": ""}	v2.0	jgi		DallocAZ0526_2	20210414	Franco MEE et al.,2022
dalloc3	Daldinia	loculata	CBS113971	{"clade": "sordariomyceta", "kingdom": "Fungi", "phylum": "Ascomycota", "subphylum": "Pezizomycotina", "class": "Sordariomycetes", "subclass": "Xylariomycetidae", "order": "Xylariales", "family": "Hypoxylaceae", "subfamily": ""}	v1.0	jgi		Dalloc1	20210414	Franco MEE et al.,2022
dalsp.1	Daldinia	sp.	FL1419	{"clade": "sordariomyceta", "kingdom": "Fungi", "phylum": "Ascomycota", "subphylum": "Pezizomycotina", "class": "Sordariomycetes", "subclass": "Xylariomycetidae", "order": "Xylariales", "family": "Hypoxylaceae", "subfamily": ""}	v1.0	jgi		DaFL1419_1	20210421	Franco MEE et al.,2022
dalsp.2	Daldinia	sp.	EC12	{"clade": "sordariomyceta", "kingdom": "Fungi", "phylum": "Ascomycota", "subphylum": "Pezizomycotina", "class": "Sordariomycetes", "subclass": "Xylariomycetidae", "order": "Xylariales", "family": "Hypoxylaceae", "subfamily": ""}	2017-05-11 00:00:00	ncbi	dalsp.2	GCA_002120325.1	20210421	2017/05/08
dalver1	Daldinia	vernicosa	CBS13973	{"clade": "sordariomyceta", "kingdom": "Fungi", "phylum": "Ascomycota", "subphylum": "Pezizomycotina", "class": "Sordariomycetes", "subclass": "Xylariomycetidae", "order": "Xylariales", "family": "Hypoxylaceae", "subfamily": ""}	v1.0	jgi		Dalver1	20210414	Franco MEE et al.,2022
debfab1	Debaryomyces	fabryi	CBS789	{"clade": "saccharomyceta", "kingdom": "Fungi", "phylum": "Ascomycota", "subphylum": "Saccharomycotina", "class": "Saccharomycetes", "order": "Saccharomycetales", "family": "Debaryomycetaceae", "subfamily": ""}	0	jgi	6273811	Debfa1	20210414	Tafer H et al.,2016
debhan1	Debaryomyces	hansenii	CBS767	{"clade": "saccharomyceta", "kingdom": "Fungi", "phylum": "Ascomycota", "subphylum": "Saccharomycotina", "class": "Saccharomycetes", "order": "Saccharomycetales", "family": "Debaryomycetaceae", "subfamily": ""}	2018-04-20 00:00:00	ncbi	debhan1	GCF_000006445.2	20210421	2004/07/03
decgau1	Decorospora	gaudefroyi		{"clade": "dothideomyceta", "kingdom": "Fungi", "phylum": "Ascomycota", "subphylum": "Pezizomycotina", "class": "Dothideomycetes", "subclass": "Pleosporomycetidae", "order": "Pleosporales", "suborder": "Pleosporineae", "family": "Pleosporaceae", "subfamily": ""}	v1.0	jgi		Decga1	20210414	Haridas S et al.,2020
dekbru1	Dekkera	bruxellensis	CBS2499	{"clade": "saccharomyceta", "kingdom": "Fungi", "phylum": "Ascomycota", "subphylum": "Saccharomycotina", "class": "Saccharomycetes", "order": "Saccharomycetales", "family": "Pichiaceae", "subfamily": ""}	v2.0	jgi		Dekbr2	20210414	Pi?kur J et al.,2012
delcon1	Delitschia	confertaspora	ATCC74209	{"clade": "dothideomyceta", "kingdom": "Fungi", "phylum": "Ascomycota", "subphylum": "Pezizomycotina", "class": "Dothideomycetes", "subclass": "Pleosporomycetidae", "order": "Pleosporales", "family": "Delitschiaceae", "subfamily": ""}	v1.0	jgi		Delco1	20210414	Haridas S et al.,2020
delstr1	Delphinella	strobiligena	CBS73571	{"clade": "dothideomyceta", "kingdom": "Fungi", "phylum": "Ascomycota", "subphylum": "Pezizomycotina", "class": "Dothideomycetes", "subclass": "Dothideomycetidae", "order": "Dothideales", "family": "Dothioraceae", "subfamily": ""}	v1.0	jgi		Delst1	20210414	Haridas S et al.,2020
denbis1	Dendrothele	bispora	CBS96296	{"clade": "Opisthokonta", "kingdom": "Fungi", "phylum": "Basidiomycota", "subphylum": "Agaricomycotina", "class": "Agaricomycetes", "subclass": "Agaricomycetidae", "order": "Agaricales", "family": "", "subfamily": ""}	v1.0	jgi		Denbi1	20210414	Varga T et al.,2019
denfra1	Dentipellis	fragilis		{"clade": "Opisthokonta", "kingdom": "Fungi", "phylum": "Basidiomycota", "subphylum": "Agaricomycotina", "class": "Agaricomycetes", "order": "Russulales", "family": "Hericiaceae", "subfamily": ""}	20190405	ncbi	SAMN10850132	GCA_004679275.1	20210414	2019/04/05
dennan1	Dendryphion	nanum	MPICAGECH0243	{"clade": "dothideomyceta", "kingdom": "Fungi", "phylum": "Ascomycota", "subphylum": "Pezizomycotina", "class": "Dothideomycetes", "subclass": "Pleosporomycetidae", "order": "Pleosporales", "family": "Torulaceae", "subfamily": ""}	v1.0	jgi		Denna1	20210414	Mesny F et al.,2021
densp.1	Dentipellis	sp.	KUC8613	{"clade": "Opisthokonta", "kingdom": "Fungi", "phylum": "Basidiomycota", "subphylum": "Agaricomycotina", "class": "Agaricomycetes", "order": "Russulales", "family": "Hericiaceae", "subfamily": ""}	v1.0	jgi	1189841	Densp1	20210414	Park H et al.,2019
diaamp1	Diaporthe	ampelina	UCDDA912	{"clade": "sordariomyceta", "kingdom": "Fungi", "phylum": "Ascomycota", "subphylum": "Pezizomycotina", "class": "Sordariomycetes", "subclass": "Sordariomycetidae", "order": "Diaporthales", "family": "Diaporthaceae", "subfamily": ""}	0	jgi	339331	Diaam1	20210414	Morales-Cruz A et al.,2015
diabat1	Diaporthe	batatas		{"clade": "sordariomyceta", "kingdom": "Fungi", "phylum": "Ascomycota", "subphylum": "Pezizomycotina", "class": "Sordariomycetes", "subclass": "Sordariomycetidae", "order": "Diaporthales", "family": "Diaporthaceae", "subfamily": ""}	2021-07-22	ncbi	diabat1	GCF_019321695.1	20210914	2021/07/22
diacit1.1	Diaporthe	citri		{"clade": "sordariomyceta", "kingdom": "Fungi", "phylum": "Ascomycota", "subphylum": "Pezizomycotina", "class": "Sordariomycetes", "subclass": "Sordariomycetidae", "order": "Diaporthales", "family": "Diaporthaceae", "subfamily": ""}	2021-05-18	ncbi	diacit1	GCF_014595645.1	None	2020/09/15
diahel1	Diaporthe	helianthi	str796	{"clade": "sordariomyceta", "kingdom": "Fungi", "phylum": "Ascomycota", "subphylum": "Pezizomycotina", "class": "Sordariomycetes", "subclass": "Sordariomycetidae", "order": "Diaporthales", "family": "Diaporthaceae", "subfamily": ""}	0	jgi		Diahe1	20210414	Baroncelli R et al.,2016
dibbae1	Dibaeis	baeomyces		{"clade": "OSLEUM clade", "kingdom": "Fungi", "phylum": "Ascomycota", "subphylum": "Pezizomycotina", "class": "Lecanoromycetes", "subclass": "Ostropomycetidae", "order": "Pertusariales", "family": "Icmadophilaceae", "subfamily": ""}	0	jgi		Dibbae1	20210414	McDonald TR et al.,2013
dicmue1	Dictyocoela	muelleri		{"clade": "Opisthokonta", "kingdom": "Fungi", "phylum": "Microsporidia", "subphylum": "", "class": "", "order": "", "family": "", "subfamily": ""}	20201222	ncbi	SAMN10502583	GCA_016256075.1	20210414	2020/12/22
dicsqu1	Dichomitus	squalens	CBS46389	{"clade": "Opisthokonta", "kingdom": "Fungi", "phylum": "Basidiomycota", "subphylum": "Agaricomycotina", "class": "Agaricomycetes", "order": "Polyporales", "family": "Polyporaceae", "subfamily": ""}	v1.0	jgi		Dicsqu463_1	20210414	Casado López S et al.,2019
dicsqu2	Dichomitus	squalens	CBS46489	{"clade": "Opisthokonta", "kingdom": "Fungi", "phylum": "Basidiomycota", "subphylum": "Agaricomycotina", "class": "Agaricomycetes", "order": "Polyporales", "family": "Polyporaceae", "subfamily": ""}	v1.0	jgi		Dicsqu464_1	20210414	Casado López S et al.,2019
dicsqu3	Dichomitus	squalens	OM183701	{"clade": "Opisthokonta", "kingdom": "Fungi", "phylum": "Basidiomycota", "subphylum": "Agaricomycotina", "class": "Agaricomycetes", "order": "Polyporales", "family": "Polyporaceae", "subfamily": ""}	v1.0	jgi		Dicsqu18370_1	20210414	Casado López S et al.,2019
dicsqu4	Dichomitus	squalens	LYAD421SS1	{"clade": "Opisthokonta", "kingdom": "Fungi", "phylum": "Basidiomycota", "subphylum": "Agaricomycotina", "class": "Agaricomycetes", "order": "Polyporales", "family": "Polyporaceae", "subfamily": ""}	v1.0	jgi		Dicsq1	20210414	Floudas D et al.,2012
didexi1	Didymella	exigua	CBS18355	{"clade": "dothideomyceta", "kingdom": "Fungi", "phylum": "Ascomycota", "subphylum": "Pezizomycotina", "class": "Dothideomycetes", "subclass": "Pleosporomycetidae", "order": "Pleosporales", "suborder": "Pleosporineae", "family": "Didymellaceae", "subfamily": ""}	v1.0	jgi	5697541	Didex1	20210414	Haridas S et al.,2020
didhet1.1	Didymella	heteroderae		{"clade": "dothideomyceta", "kingdom": "Fungi", "phylum": "Ascomycota", "subphylum": "Pezizomycotina", "class": "Dothideomycetes", "subclass": "Pleosporomycetidae", "order": "Pleosporales", "suborder": "Pleosporineae", "family": "Didymellaceae", "subfamily": ""}	20200303	ncbi	SAMN11403614	GCA_011058895.1	None	2020/03/03
didker1.1	Didymella	keratinophila		{"clade": "dothideomyceta", "kingdom": "Fungi", "phylum": "Ascomycota", "subphylum": "Pezizomycotina", "class": "Dothideomycetes", "subclass": "Pleosporomycetidae", "order": "Pleosporales", "suborder": "Pleosporineae", "family": "Didymellaceae", "subfamily": ""}	20200303	ncbi	SAMN11403613	GCA_011058865.1	None	2020/03/03
didzea1	Didymella	zeae-maydis	3018	{"clade": "dothideomyceta", "kingdom": "Fungi", "phylum": "Ascomycota", "subphylum": "Pezizomycotina", "class": "Dothideomycetes", "subclass": "Pleosporomycetidae", "order": "Pleosporales", "suborder": "Pleosporineae", "family": "Didymellaceae", "subfamily": ""}	0	jgi		Didma1	20210414	Condon BJ et al.,2018
dimcri1	Dimargaris	cristalligena	RSA468singlecell	{"clade": "Opisthokonta", "kingdom": "Fungi", "phylum": "Zoopagomycota", "subphylum": "Kickxellomycotina", "class": "Dimargaritomycetes", "order": "Dimargaritales", "family": "Dimargaritaceae", "subfamily": ""}	v1.0	jgi		DimcrSC1	20210414	Ahrendt SR et al.,2018
dipcor1	Diplodia	corticola		{"clade": "dothideomyceta", "kingdom": "Fungi", "phylum": "Ascomycota", "subphylum": "Pezizomycotina", "class": "Dothideomycetes", "order": "Botryosphaeriales", "family": "Botryosphaeriaceae", "subfamily": ""}	20161118	ncbi	SAMN05253255	GCF_001883845.1	20210414	2016/11/18
dipros1	Diplocarpon	rosae		{"clade": "sordariomyceta", "kingdom": "Fungi", "phylum": "Ascomycota", "subphylum": "Pezizomycotina", "class": "Leotiomycetes", "order": "Helotiales", "family": "Drepanopezizaceae", "subfamily": ""}	20200316	ncbi	SAMN06163654	GCA_002317995.1	20210414	2017/09/20
dipser1	Diplodia	seriata	DS831	{"clade": "dothideomyceta", "kingdom": "Fungi", "phylum": "Ascomycota", "subphylum": "Pezizomycotina", "class": "Dothideomycetes", "order": "Botryosphaeriales", "family": "Botryosphaeriaceae", "subfamily": ""}	0	jgi		Dipse1	20210414	Morales-Cruz A et al.,2015
disaci1.1	Dissoconium	aciculare	CBS34282	{"clade": "dothideomyceta", "kingdom": "Fungi", "phylum": "Ascomycota", "subphylum": "Pezizomycotina", "class": "Dothideomycetes", "subclass": "Dothideomycetidae", "order": "Mycosphaerellales", "family": "Dissoconiaceae", "subfamily": ""}	2020-03-24 00:00:00	ncbi	disaci1	GCF_010015565.1	None	2020/01/29
disglo1.1	Dissophora	globulifera		{"clade": "Opisthokonta", "kingdom": "Fungi", "phylum": "Mucoromycota", "subphylum": "Mortierellomycotina", "class": "Mortierellomycetes", "order": "Mortierellales", "family": "Mortierellaceae", "subfamily": ""}	20210104	ncbi	SAMN05720531	GCA_016097935.1	None	2020/12/16
disglo2.1	Dissophora	globulifera		{"clade": "Opisthokonta", "kingdom": "Fungi", "phylum": "Mucoromycota", "subphylum": "Mortierellomycotina", "class": "Mortierellomycetes", "order": "Mortierellales", "family": "Mortierellaceae", "subfamily": ""}	20210104	ncbi	SAMN05720444	GCA_016097885.1	None	2020/12/16
diurug1	Diutina	rugosa		{"clade": "saccharomyceta", "kingdom": "Fungi", "phylum": "Ascomycota", "subphylum": "Saccharomycotina", "class": "Saccharomycetes", "order": "Saccharomycetales", "family": "", "subfamily": ""}	20210125	ncbi	SAMN11490865	GCF_008704595.1	20210414	2019/09/26
divepi1	Diversispora	epigaea		{"clade": "Opisthokonta", "kingdom": "Fungi", "phylum": "Mucoromycota", "subphylum": "Glomeromycotina", "class": "Glomeromycetes", "order": "Diversisporales", "family": "Diversisporaceae", "subfamily": ""}	20190328	ncbi	SAMN08400201	GCA_003547095.1	20210414	2018/09/12
dotsep1	Dothistroma	septosporum	NZE10	{"clade": "dothideomyceta", "kingdom": "Fungi", "phylum": "Ascomycota", "subphylum": "Pezizomycotina", "class": "Dothideomycetes", "subclass": "Dothideomycetidae", "order": "Mycosphaerellales", "family": "Mycosphaerellaceae", "subfamily": ""}	v1.0	jgi	554948	Dotse1	20210414	de Wit PJ et al.,2012~Ohm RA et al.,2012
dotsym1.1	Dothidotthia	symphoricarpi	CBS119687	{"clade": "dothideomyceta", "kingdom": "Fungi", "phylum": "Ascomycota", "subphylum": "Pezizomycotina", "class": "Dothideomycetes", "subclass": "Pleosporomycetidae", "order": "Pleosporales", "family": "Dothidotthiaceae", "subfamily": ""}	2020-03-24 00:00:00	ncbi	dotsym1	GCF_010015815.1	None	2020/01/29
drebro1	Drechslerella	brochopaga		{"clade": "saccharomyceta", "kingdom": "Fungi", "phylum": "Ascomycota", "subphylum": "Pezizomycotina", "class": "Orbiliomycetes", "order": "Orbiliales", "family": "Orbiliaceae", "subfamily": ""}	20200408	ncbi	SAMN03658141	GCA_012184305.1	20210414	2020/04/08
drecon1	Drechmeria	coniospora	ARSEF6962	{"clade": "sordariomyceta", "kingdom": "Fungi", "phylum": "Ascomycota", "subphylum": "Pezizomycotina", "class": "Sordariomycetes", "subclass": "Hypocreomycetidae", "order": "Hypocreales", "family": "Ophiocordycipitaceae", "subfamily": ""}	0	jgi	730371	Dreco1	20210414	Zhang L et al.,2016
durrog1	Durotheca	rogersii	YMJ92031201	{"clade": "sordariomyceta", "kingdom": "Fungi", "phylum": "Ascomycota", "subphylum": "Pezizomycotina", "class": "Sordariomycetes", "subclass": "Xylariomycetidae", "order": "Xylariales", "family": "Xylariaceae", "subfamily": ""}	v1.0	jgi		Durrog2	20210414	Franco MEE et al.,2022
earsca1	Earliella	scabrosa	CIRMBRFM1817	{"clade": "Opisthokonta", "kingdom": "Fungi", "phylum": "Basidiomycota", "subphylum": "Agaricomycotina", "class": "Agaricomycetes", "order": "Polyporales", "family": "Polyporaceae", "subfamily": ""}	v1.0	jgi		Earsca1	20210414	Hage H et al.,2021
edhaed1	Edhazardia	aedis	USNM41457	{"clade": "Opisthokonta", "kingdom": "Fungi", "phylum": "Microsporidia", "family": "Culicosporidae", "subphylum": "", "class": "", "order": "", "subfamily": ""}	0	jgi	507678	Edhae1	20210414	Desjardins CA et al.,2015
elagra1	Elaphomyces	granulatus		{"clade": "leotiomyceta", "kingdom": "Fungi", "phylum": "Ascomycota", "subphylum": "Pezizomycotina", "class": "Eurotiomycetes", "subclass": "Eurotiomycetidae", "order": "Eurotiales", "family": "Elaphomycetaceae", "subfamily": ""}	20170804	ncbi	SAMN02796050	GCA_002240705.1	20210414	2017/08/04
elagra2	Elaphomyces	granulatus	OSC145934	{"clade": "leotiomyceta", "kingdom": "Fungi", "phylum": "Ascomycota", "subphylum": "Pezizomycotina", "class": "Eurotiomycetes", "subclass": "Eurotiomycetidae", "order": "Eurotiales", "family": "Elaphomycetaceae", "subfamily": ""}	0	jgi	1164831	Elagr1	20210421	Quandt CA et al.,2015
elsamp1	Elsinoe	ampelina	CECT20119	{"clade": "dothideomyceta", "kingdom": "Fungi", "phylum": "Ascomycota", "subphylum": "Pezizomycotina", "class": "Dothideomycetes", "subclass": "Dothideomycetidae", "order": "Myriangiales", "family": "Elsinoaceae", "subfamily": ""}	v1.0	jgi		Elsamp1	20210414	Haridas S et al.,2020
elsaus1	Elsinoe	australis		{"clade": "dothideomyceta", "kingdom": "Fungi", "phylum": "Ascomycota", "subphylum": "Pezizomycotina", "class": "Dothideomycetes", "subclass": "Dothideomycetidae", "order": "Myriangiales", "family": "Elsinoaceae", "subfamily": ""}	20180322	ncbi	SAMN06890669	GCA_003013795.1	20210414	2018/03/22
elsaus2.1	Elsinoe	australis		{"clade": "dothideomyceta", "kingdom": "Fungi", "phylum": "Ascomycota", "subphylum": "Pezizomycotina", "class": "Dothideomycetes", "subclass": "Dothideomycetidae", "order": "Myriangiales", "family": "Elsinoaceae", "subfamily": ""}	20190515	ncbi	SAMN08323602	GCA_005382405.1	None	2019/05/15
elsbat1	Elsinoe	batatas		{"clade": "dothideomyceta", "kingdom": "Fungi", "phylum": "Ascomycota", "subphylum": "Pezizomycotina", "class": "Dothideomycetes", "subclass": "Dothideomycetidae", "order": "Myriangiales", "family": "Elsinoaceae", "subfamily": ""}	2021-08-12	ncbi	elsbat1	GCA_017309325.2	20210914	2021/03/09
elsfaw1	Elsinoe	fawcettii		{"clade": "dothideomyceta", "kingdom": "Fungi", "phylum": "Ascomycota", "subphylum": "Pezizomycotina", "class": "Dothideomycetes", "subclass": "Dothideomycetidae", "order": "Myriangiales", "family": "Elsinoaceae", "subfamily": ""}	20200506	ncbi	SAMN10239534	GCA_012977835.1	20210414	2020/05/06
emepas1	Emergomyces	pasteurianus	UAMH9510	{"clade": "leotiomyceta", "kingdom": "Fungi", "phylum": "Ascomycota", "subphylum": "Pezizomycotina", "class": "Eurotiomycetes", "subclass": "Eurotiomycetidae", "order": "Onygenales", "family": "Ajellomycetaceae", "subfamily": ""}	0	jgi		Emepa1	20210421	Dukik K et al.,2017
emepas2.1	Emergomyces	pasteurianus	Ep9510	{"clade": "leotiomyceta", "kingdom": "Fungi", "phylum": "Ascomycota", "subphylum": "Pezizomycotina", "class": "Eurotiomycetes", "subclass": "Eurotiomycetidae", "order": "Onygenales", "family": "Ajellomycetaceae", "subfamily": ""}	2021-06-16	ncbi	emepas2	GCA_001883825.1	None	2016/11/18
emesp.1	Emericellopsis	sp.	TS7	{"clade": "sordariomyceta", "kingdom": "Fungi", "phylum": "Ascomycota", "subphylum": "Pezizomycotina", "class": "Sordariomycetes", "subclass": "Hypocreomycetidae", "order": "Hypocreales", "family": "", "subfamily": ""}	2021-08-21	ncbi	emesp.1	GCF_019669845.1	20211019	2021/08/18
emesp.2	Emericellopsis	sp.	TS7	{"clade": "sordariomyceta", "kingdom": "Fungi", "phylum": "Ascomycota", "subphylum": "Pezizomycotina", "class": "Sordariomycetes", "subclass": "Hypocreomycetidae", "order": "Hypocreales", "family": "", "subfamily": ""}	v1.0	jgi	SAMN12811583	AcreTS7_1	None	Hagestad OC et al.,2021
emmcre1	Emmonsia	crescens	UAMH4076	{"clade": "leotiomyceta", "kingdom": "Fungi", "phylum": "Ascomycota", "subphylum": "Pezizomycotina", "class": "Eurotiomycetes", "subclass": "Eurotiomycetidae", "order": "Onygenales", "family": "Ajellomycetaceae", "subfamily": ""}	0	jgi		Emmcr1	20210421	Muñoz JF et al.,2018
emmcre2.1	Emmonsia	crescens	UAMH3008	{"clade": "leotiomyceta", "kingdom": "Fungi", "phylum": "Ascomycota", "subphylum": "Pezizomycotina", "class": "Eurotiomycetes", "subclass": "Eurotiomycetidae", "order": "Onygenales", "family": "Ajellomycetaceae", "subfamily": ""}	2015-05-15 00:00:00	ncbi	emmcre2	GCA_001008285.1	None	2015/05/15
emmpar1	Emmonsia	parva	UAMH130	{"clade": "leotiomyceta", "kingdom": "Fungi", "phylum": "Ascomycota", "subphylum": "Pezizomycotina", "class": "Eurotiomycetes", "subclass": "Eurotiomycetidae", "order": "Onygenales", "family": "Ajellomycetaceae", "subfamily": ""}	0	jgi		Emmpa1	20210414	Muñoz JF et al.,2018
emmsp.1	Emmonsia	sp.	CAC2015a	{"clade": "leotiomyceta", "kingdom": "Fungi", "phylum": "Ascomycota", "subphylum": "Pezizomycotina", "class": "Eurotiomycetes", "subclass": "Eurotiomycetidae", "order": "Onygenales", "family": "Ajellomycetaceae", "subfamily": ""}	20160609	ncbi	SAMN03703140	GCA_001660665.1	20210414	2016/06/09
enccun1	Encephalitozoon	cuniculi	GBM1	{"clade": "Opisthokonta", "kingdom": "Fungi", "phylum": "Microsporidia", "suborder": "Apansporoblastina", "family": "Unikaryonidae", "subphylum": "", "class": "", "order": "", "subfamily": ""}	0	jgi	256118	Enccu1	20210421	Peyretaillade E et al.,2009~Katinka MD et al.,2001
enccun2.1	Encephalitozoon	cuniculi	EcunIIIL	{"clade": "Opisthokonta", "kingdom": "Fungi", "phylum": "Microsporidia", "suborder": "Apansporoblastina", "family": "Unikaryonidae", "subphylum": "", "class": "", "order": "", "subfamily": ""}	2015-07-15 00:00:00	ncbi	enccun2	GCA_001078035.1	None	2015/07/15
enchel1	Encephalitozoon	hellem	ATCC50504	{"clade": "Opisthokonta", "kingdom": "Fungi", "phylum": "Microsporidia", "suborder": "Apansporoblastina", "family": "Unikaryonidae", "subphylum": "", "class": "", "order": "", "subfamily": ""}	0	jgi	50651	Enche1	20210414	Pombert JF et al.,2012
encint1	Encephalitozoon	intestinalis	ATCC50506	{"clade": "Opisthokonta", "kingdom": "Fungi", "phylum": "Microsporidia", "suborder": "Apansporoblastina", "family": "Unikaryonidae", "subphylum": "", "class": "", "order": "", "subfamily": ""}	0	jgi		Encin1	20210414	Corradi N et al.,2010
encrom1	Encephalitozoon	romaleae	SJ2008	{"clade": "Opisthokonta", "kingdom": "Fungi", "phylum": "Microsporidia", "suborder": "Apansporoblastina", "family": "Unikaryonidae", "subphylum": "", "class": "", "order": "", "subfamily": ""}	0	jgi	48111	Encro1	20210414	Pombert JF et al.,2012
endpal1	Endocarpon	pallidulum	Enpa	{"clade": "leotiomyceta", "kingdom": "Fungi", "phylum": "Ascomycota", "subphylum": "Pezizomycotina", "class": "Eurotiomycetes", "subclass": "Chaetothyriomycetidae", "order": "Verrucariales", "family": "Verrucariaceae", "subfamily": ""}	0	jgi		Endpal1	20210414	McDonald TR et al.,2013
endpus1	Endocarpon	pusillum	Z07020	{"clade": "leotiomyceta", "kingdom": "Fungi", "phylum": "Ascomycota", "subphylum": "Pezizomycotina", "class": "Eurotiomycetes", "subclass": "Chaetothyriomycetidae", "order": "Verrucariales", "family": "Verrucariaceae", "subfamily": ""}	0	jgi	62581	EndpusZ1	20210414	Wang YY et al.,2014
endsp.1	Endogone	sp	FLAS59071	{"clade": "Opisthokonta", "kingdom": "Fungi", "phylum": "Mucoromycota", "subphylum": "Mucoromycotina", "class": "Endogonomycetes", "order": "Endogonales", "family": "Endogonaceae", "subfamily": ""}	0	jgi		Endsp1	20210414	Chang Y et al.,2019
entbel1.1	Entomortierella	beljakovae		{"clade": "Opisthokonta", "kingdom": "Fungi", "phylum": "Mucoromycota", "subphylum": "Mortierellomycotina", "class": "Mortierellomycetes", "order": "Mortierellales", "family": "Mortierellaceae", "subfamily": ""}	20210104	ncbi	SAMN05720775	GCA_015679585.1	None	2020/11/24
entchl1.1	Entomortierella	chlamydospora		{"clade": "Opisthokonta", "kingdom": "Fungi", "phylum": "Mucoromycota", "subphylum": "Mortierellomycotina", "class": "Mortierellomycetes", "order": "Mortierellales", "family": "Mortierellaceae", "subfamily": ""}	20210104	ncbi	SAMN05720793	GCA_015849335.1	None	2020/12/08
entchl2.1	Entomortierella	chlamydospora		{"clade": "Opisthokonta", "kingdom": "Fungi", "phylum": "Mucoromycota", "subphylum": "Mortierellomycotina", "class": "Mortierellomycetes", "order": "Mortierellales", "family": "Mortierellaceae", "subfamily": ""}	20210104	ncbi	SAMN05720521	GCA_015852335.1	None	2020/12/08
enthep1	Enterocytozoon	hepatopenaei	TH1	{"clade": "Opisthokonta", "kingdom": "Fungi", "phylum": "Microsporidia", "suborder": "Apansporoblastina", "family": "Enterocytozoonidae", "subphylum": "", "class": "", "order": "", "subfamily": ""}	0	jgi	1063321	Enthe1	20210414	Wiredu Boakye D et al.,2017
entlig1.1	Entomortierella	lignicola		{"clade": "Opisthokonta", "kingdom": "Fungi", "phylum": "Mucoromycota", "subphylum": "Mortierellomycotina", "class": "Mortierellomycetes", "order": "Mortierellales", "family": "Mortierellaceae", "subfamily": ""}	20210104	ncbi	SAMN05720451	GCA_015500005.1	None	2020/11/16
entmus1.1	Entomophthora	muscae		{"clade": "Opisthokonta", "kingdom": "Fungi", "phylum": "Zoopagomycota", "subphylum": "Entomophthoromycotina", "class": "Entomophthoromycetes", "order": "Entomophthorales", "family": "Entomophthoraceae", "subfamily": ""}	20201002	ncbi	SAMN09621101	GCA_014839935.1	None	2020/10/02
epifes1.1	Epichloe	festucae	Fl1	{"clade": "sordariomyceta", "kingdom": "Fungi", "phylum": "Ascomycota", "subphylum": "Pezizomycotina", "class": "Sordariomycetes", "subclass": "Hypocreomycetidae", "order": "Hypocreales", "family": "Clavicipitaceae", "subfamily": ""}	20201124	ncbi	SAMN08391367	GCA_003814445.1	None	2018/11/23
epityp1	Epithele	typhae	CBS20358	{"clade": "Opisthokonta", "kingdom": "Fungi", "phylum": "Basidiomycota", "subphylum": "Agaricomycotina", "class": "Agaricomycetes", "order": "Russulales", "family": "Epitheliaceae", "subfamily": ""}	v1.0	jgi		Epityp1	20210414	Hage H et al.,2021
erebil1	Eremomyces	bilateralis	CBS78170	{"clade": "dothideomyceta", "kingdom": "Fungi", "phylum": "Ascomycota", "subphylum": "Pezizomycotina", "class": "Dothideomycetes", "order": "Eremomycetales", "family": "Eremomycetaceae", "subfamily": ""}	v1.0	jgi		Erebi1	20210414	Haridas S et al.,2020
erecym1	Eremothecium	cymbalariae	DBVPG7215	{"clade": "saccharomyceta", "kingdom": "Fungi", "phylum": "Ascomycota", "subphylum": "Saccharomycotina", "class": "Saccharomycetes", "order": "Saccharomycetales", "family": "Saccharomycetaceae", "subfamily": ""}	0	jgi	328258	Erecy1	20210414	Wendland J et al.,2011
eregos1	Eremothecium	gossypii	FDAG1	{"clade": "saccharomyceta", "kingdom": "Fungi", "phylum": "Ascomycota", "subphylum": "Saccharomycotina", "class": "Saccharomycetes", "order": "Saccharomycetales", "family": "Saccharomycetaceae", "subfamily": ""}	0	jgi		Erego1	20210414	Dietrich FS et al.,2013
eregos2	Eremothecium	gossypii	ATCC10895	{"clade": "saccharomyceta", "kingdom": "Fungi", "phylum": "Ascomycota", "subphylum": "Saccharomycotina", "class": "Saccharomycetes", "order": "Saccharomycetales", "family": "Saccharomycetaceae", "subfamily": ""}	0	jgi	500488	Ashgo1_1	20210414	Dietrich FS et al.,2004
eresin1.1	Eremothecium	sinecaudum		{"clade": "saccharomyceta", "kingdom": "Fungi", "phylum": "Ascomycota", "subphylum": "Saccharomycotina", "class": "Saccharomycetes", "order": "Saccharomycetales", "family": "Saccharomycetaceae", "subfamily": ""}	20160913	ncbi	SAMN04445727	GCF_001548555.1	None	2016/02/04
erypul1	Erysiphe	pulchra	Cflorida	{"clade": "sordariomyceta", "kingdom": "Fungi", "phylum": "Ascomycota", "subphylum": "Pezizomycotina", "class": "Leotiomycetes", "order": "Erysiphales", "family": "Erysiphaceae", "subfamily": ""}	0	jgi	1556711	Erypu1	20210414	Wadl PA et al.,2019
escweb1	Escovopsis	weberi	CC03120810	{"clade": "sordariomyceta", "kingdom": "Fungi", "phylum": "Ascomycota", "subphylum": "Pezizomycotina", "class": "Sordariomycetes", "subclass": "Hypocreomycetidae", "order": "Hypocreales", "family": "Hypocreaceae", "subfamily": ""}	0	jgi		Escweb1	20210414	de Man TJ et al.,2016
eurrub1	Eurotium	rubrum		{"clade": "leotiomyceta", "kingdom": "Fungi", "phylum": "Ascomycota", "subphylum": "Pezizomycotina", "class": "Eurotiomycetes", "subclass": "Eurotiomycetidae", "order": "Eurotiales", "family": "Aspergillaceae", "subfamily": ""}	v1.0	jgi		Eurhe1	20210414	Kis-Papo T et al.,2014
eutlat1	Eutypa	lata	UCREL1	{"clade": "sordariomyceta", "kingdom": "Fungi", "phylum": "Ascomycota", "subphylum": "Pezizomycotina", "class": "Sordariomycetes", "subclass": "Xylariomycetidae", "order": "Xylariales", "family": "Diatrypaceae", "subfamily": ""}	0	jgi	573128	Eutla1	20210414	Blanco-Ulate B et al.,2013
exoaqu1	Exophiala	aquamarina	CBS119918	{"clade": "leotiomyceta", "kingdom": "Fungi", "phylum": "Ascomycota", "subphylum": "Pezizomycotina", "class": "Eurotiomycetes", "subclass": "Chaetothyriomycetidae", "order": "Chaetothyriales", "family": "Herpotrichiellaceae", "subfamily": ""}	2017-06-26	ncbi	exoaqu1	GCF_000709125.1	20210709	2014/06/16
exoder1	Exophiala	dermatitidis	UT8656	{"clade": "leotiomyceta", "kingdom": "Fungi", "phylum": "Ascomycota", "subphylum": "Pezizomycotina", "class": "Eurotiomycetes", "subclass": "Chaetothyriomycetidae", "order": "Chaetothyriales", "family": "Herpotrichiellaceae", "subfamily": ""}	0	jgi		Exode1	20210421	Chen Z et al.,2014~Teixeira MM et al.,2017
exoder2.1	Exophiala	dermatitidis	NIHUT8656	{"clade": "leotiomyceta", "kingdom": "Fungi", "phylum": "Ascomycota", "subphylum": "Pezizomycotina", "class": "Eurotiomycetes", "subclass": "Chaetothyriomycetidae", "order": "Chaetothyriales", "family": "Herpotrichiellaceae", "subfamily": ""}	2017-06-26 00:00:00	ncbi	exoder2	GCF_000230625.1	None	2011/10/14
exomes1	Exophiala	mesophila	CBS40295	{"clade": "leotiomyceta", "kingdom": "Fungi", "phylum": "Ascomycota", "subphylum": "Pezizomycotina", "class": "Eurotiomycetes", "subclass": "Chaetothyriomycetidae", "order": "Chaetothyriales", "family": "Herpotrichiellaceae", "subfamily": ""}	0	jgi	301301	Exome1	20210414	Teixeira MM et al.,2017
exooli1	Exophiala	oligosperma	CBS72588	{"clade": "leotiomyceta", "kingdom": "Fungi", "phylum": "Ascomycota", "subphylum": "Pezizomycotina", "class": "Eurotiomycetes", "subclass": "Chaetothyriomycetidae", "order": "Chaetothyriales", "family": "Herpotrichiellaceae", "subfamily": ""}	0	jgi	301291	Exool1	20210414	Teixeira MM et al.,2017
exosid1	Exophiala	sideris	CBS121828	{"clade": "leotiomyceta", "kingdom": "Fungi", "phylum": "Ascomycota", "subphylum": "Pezizomycotina", "class": "Eurotiomycetes", "subclass": "Chaetothyriomycetidae", "order": "Chaetothyriales", "family": "Herpotrichiellaceae", "subfamily": ""}	0	jgi	301231	Exosi1	20210414	Teixeira MM et al.,2017
exospi1	Exophiala	spinifera	CBS89968	{"clade": "leotiomyceta", "kingdom": "Fungi", "phylum": "Ascomycota", "subphylum": "Pezizomycotina", "class": "Eurotiomycetes", "subclass": "Chaetothyriomycetidae", "order": "Chaetothyriales", "family": "Herpotrichiellaceae", "subfamily": ""}	0	jgi	301251	Exosp1	20210414	Teixeira MM et al.,2017
exoxen1	Exophiala	xenobiotica	CBS118157	{"clade": "leotiomyceta", "kingdom": "Fungi", "phylum": "Ascomycota", "subphylum": "Pezizomycotina", "class": "Eurotiomycetes", "subclass": "Chaetothyriomycetidae", "order": "Chaetothyriales", "family": "Herpotrichiellaceae", "subfamily": ""}	0	jgi	301331	Exoxe1	20210414	Teixeira MM et al.,2017
exstur1.1	Exserohilum	turcica	Et28A	{"clade": "dothideomyceta", "kingdom": "Fungi", "phylum": "Ascomycota", "subphylum": "Pezizomycotina", "class": "Dothideomycetes", "subclass": "Pleosporomycetidae", "order": "Pleosporales", "suborder": "Pleosporineae", "family": "Pleosporaceae", "subfamily": ""}	20140505	ncbi	SAMN00120049	GCF_000359705.1	None	2013/04/09
fibpsy1	Fibulorhizoctonia	psychrophila	CBS109695	{"clade": "Opisthokonta", "kingdom": "Fungi", "phylum": "Basidiomycota", "subphylum": "Agaricomycotina", "class": "Agaricomycetes", "subclass": "Agaricomycetidae", "order": "Atheliales", "family": "Atheliaceae", "subfamily": ""}	v1.0	jgi		Fibsp1	20210414	Nagy LG et al.,2016
fibrad1	Fibroporia	radiculosa	TFFH294	{"clade": "Opisthokonta", "kingdom": "Fungi", "phylum": "Basidiomycota", "subphylum": "Agaricomycotina", "class": "Agaricomycetes", "order": "Polyporales", "family": "", "subfamily": ""}	0	jgi	458278	Fibra1	20210414	Tang JD et al.,2012
filflo1	Filobasidium	floriforme	CBS6241	{"clade": "Opisthokonta", "kingdom": "Fungi", "phylum": "Basidiomycota", "subphylum": "Agaricomycotina", "class": "Tremellomycetes", "order": "Filobasidiales", "family": "Filobasidiaceae", "subfamily": ""}	v1.0	jgi		Filflo1	20210414	Guerreiro MA et al.,2022
fombet1	Fomitopsis	betulina	CIRMBRFM1772	{"clade": "Opisthokonta", "kingdom": "Fungi", "phylum": "Basidiomycota", "subphylum": "Agaricomycotina", "class": "Agaricomycetes", "order": "Polyporales", "family": "Fomitopsidaceae", "subfamily": ""}	v1.1	jgi		Pipbet1_1	20210414	Hage H et al.,2021
fomfom1	Fomes	fomentarius	CIRMBRFM1821	{"clade": "Opisthokonta", "kingdom": "Fungi", "phylum": "Basidiomycota", "subphylum": "Agaricomycotina", "class": "Agaricomycetes", "order": "Polyporales", "family": "Polyporaceae", "subfamily": ""}	v1.0	jgi		Fomfom1	20210414	Hage H et al.,2021
fommed1.1	Fomitiporia	mediterranea	MF322	{"clade": "Opisthokonta", "kingdom": "Fungi", "phylum": "Basidiomycota", "subphylum": "Agaricomycotina", "class": "Agaricomycetes", "order": "Hymenochaetales", "family": "Hymenochaetaceae", "subfamily": ""}	2014-08-11 00:00:00	ncbi	fommed1	GCF_000271605.1	None	2012/06/21
fompin1	Fomitopsis	pinicola	FP58527SS1	{"clade": "Opisthokonta", "kingdom": "Fungi", "phylum": "Basidiomycota", "subphylum": "Agaricomycotina", "class": "Agaricomycetes", "order": "Polyporales", "family": "Fomitopsidaceae", "subfamily": ""}	v3.0	jgi	46851	Fompi3	20210414	Floudas D et al.,2012
fonere1	Fonsecaea	erecta	CBS125763	{"clade": "leotiomyceta", "kingdom": "Fungi", "phylum": "Ascomycota", "subphylum": "Pezizomycotina", "class": "Eurotiomycetes", "subclass": "Chaetothyriomycetidae", "order": "Chaetothyriales", "family": "Herpotrichiellaceae", "subfamily": ""}	0	jgi	749831	Foner1	20210414	Vicente VA et al.,2017
fonmon1	Fonsecaea	monophora	CBS26937	{"clade": "leotiomyceta", "kingdom": "Fungi", "phylum": "Ascomycota", "subphylum": "Pezizomycotina", "class": "Eurotiomycetes", "subclass": "Chaetothyriomycetidae", "order": "Chaetothyriales", "family": "Herpotrichiellaceae", "subfamily": ""}	0	jgi	739361	Fonmo1	20210414	Bombassaro A et al.,2016
fonmul1	Fonsecaea	multimorphosa	CBS102226	{"clade": "leotiomyceta", "kingdom": "Fungi", "phylum": "Ascomycota", "subphylum": "Pezizomycotina", "class": "Eurotiomycetes", "subclass": "Chaetothyriomycetidae", "order": "Chaetothyriales", "family": "Herpotrichiellaceae", "subfamily": ""}	0	jgi	301341	Fonmu1	20210414	Teixeira MM et al.,2017
fonnub1	Fonsecaea	nubica	CBS26964	{"clade": "leotiomyceta", "kingdom": "Fungi", "phylum": "Ascomycota", "subphylum": "Pezizomycotina", "class": "Eurotiomycetes", "subclass": "Chaetothyriomycetidae", "order": "Chaetothyriales", "family": "Herpotrichiellaceae", "subfamily": ""}	0	jgi	741891	Fonnu1	20210414	Costa FF et al.,2016
friend1.1	Friedmanniomyces	endolithicus		{"clade": "dothideomyceta", "kingdom": "Fungi", "phylum": "Ascomycota", "subphylum": "Pezizomycotina", "class": "Dothideomycetes", "subclass": "Dothideomycetidae", "order": "Mycosphaerellales", "family": "Teratosphaeriaceae", "subfamily": ""}	20190502	ncbi	SAMN06285188	GCA_005059855.1	None	2019/05/02
frisim1.1	Friedmanniomyces	simplex		{"clade": "dothideomyceta", "kingdom": "Fungi", "phylum": "Ascomycota", "subphylum": "Pezizomycotina", "class": "Dothideomycetes", "subclass": "Dothideomycetidae", "order": "Mycosphaerellales", "family": "Teratosphaeriaceae", "subfamily": ""}	20190502	ncbi	SAMN06285189	GCA_005059865.1	None	2019/05/02
furboo1.1	Furculomyces	boomerangus		{"clade": "Opisthokonta", "kingdom": "Fungi", "phylum": "Zoopagomycota", "subphylum": "Kickxellomycotina", "class": "Harpellomycetes", "order": "Harpellales", "family": "Harpellaceae", "subfamily": ""}	20180601	ncbi	SAMN05412446	GCA_003086725.1	None	2018/05/03
fusacu1	Fusarium	acutatum		{"clade": "sordariomyceta", "kingdom": "Fungi", "phylum": "Ascomycota", "subphylum": "Pezizomycotina", "class": "Sordariomycetes", "subclass": "Hypocreomycetidae", "order": "Hypocreales", "family": "Nectriaceae", "subfamily": ""}	20201030	ncbi	SAMN13683610	GCA_012932015.1	20210414	2020/04/29
fusaga1	Fusarium	agapanthi		{"clade": "sordariomyceta", "kingdom": "Fungi", "phylum": "Ascomycota", "subphylum": "Pezizomycotina", "class": "Sordariomycetes", "subclass": "Hypocreomycetidae", "order": "Hypocreales", "family": "Nectriaceae", "subfamily": ""}	20200429	ncbi	SAMN04534733	GCA_001654555.2	20210414	2016/06/02
fusalb1	Fusarium	albosuccineum		{"clade": "sordariomyceta", "kingdom": "Fungi", "phylum": "Ascomycota", "subphylum": "Pezizomycotina", "class": "Sordariomycetes", "subclass": "Hypocreomycetidae", "order": "Hypocreales", "family": "Nectriaceae", "subfamily": ""}	20201030	ncbi	SAMN13683636	GCA_012931995.1	20210414	2020/04/29
fusamb1.1	Fusarium	ambrosium		{"clade": "sordariomyceta", "kingdom": "Fungi", "phylum": "Ascomycota", "subphylum": "Pezizomycotina", "class": "Sordariomycetes", "subclass": "Hypocreomycetidae", "order": "Hypocreales", "family": "Nectriaceae", "subfamily": ""}	20181214	ncbi	SAMN07200640	GCA_003947045.1	None	2018/12/14
fusant1	Fusarium	anthophilum		{"clade": "sordariomyceta", "kingdom": "Fungi", "phylum": "Ascomycota", "subphylum": "Pezizomycotina", "class": "Sordariomycetes", "subclass": "Hypocreomycetidae", "order": "Hypocreales", "family": "Nectriaceae", "subfamily": ""}	20201030	ncbi	SAMN13683615	GCA_013364935.1	20210414	2020/06/19
fusaus1	Fusarium	austroafricanum		{"clade": "sordariomyceta", "kingdom": "Fungi", "phylum": "Ascomycota", "subphylum": "Pezizomycotina", "class": "Sordariomycetes", "subclass": "Hypocreomycetidae", "order": "Hypocreales", "family": "Nectriaceae", "subfamily": ""}	20201030	ncbi	SAMN09785228	GCA_012932025.1	20210414	2020/04/29
fusaus2	Fusarium	austroamericanum		{"clade": "sordariomyceta", "kingdom": "Fungi", "phylum": "Ascomycota", "subphylum": "Pezizomycotina", "class": "Sordariomycetes", "subclass": "Hypocreomycetidae", "order": "Hypocreales", "family": "Nectriaceae", "subfamily": ""}	20201030	ncbi	SAMN13683584	GCA_013364965.1	20210414	2020/06/19
fusave1	Fusarium	avenaceum		{"clade": "sordariomyceta", "kingdom": "Fungi", "phylum": "Ascomycota", "subphylum": "Pezizomycotina", "class": "Sordariomycetes", "subclass": "Hypocreomycetidae", "order": "Hypocreales", "family": "Nectriaceae", "subfamily": ""}	20150128	ncbi	SAMN02887289	GCA_000769215.1	20210414	2014/10/10
fusbeo1	Fusarium	beomiforme		{"clade": "sordariomyceta", "kingdom": "Fungi", "phylum": "Ascomycota", "subphylum": "Pezizomycotina", "class": "Sordariomycetes", "subclass": "Hypocreomycetidae", "order": "Hypocreales", "family": "Nectriaceae", "subfamily": ""}	20200427	ncbi	SAMN07943531	GCA_002980475.2	20210414	2018/03/07
fusbul1	Fusarium	bulbicola		{"clade": "sordariomyceta", "kingdom": "Fungi", "phylum": "Ascomycota", "subphylum": "Pezizomycotina", "class": "Sordariomycetes", "subclass": "Hypocreomycetidae", "order": "Hypocreales", "family": "Nectriaceae", "subfamily": ""}	20201030	ncbi	SAMN13683612	GCA_013758895.1	20210414	2020/07/27
fuscir1	Fusarium	circinatum		{"clade": "sordariomyceta", "kingdom": "Fungi", "phylum": "Ascomycota", "subphylum": "Pezizomycotina", "class": "Sordariomycetes", "subclass": "Hypocreomycetidae", "order": "Hypocreales", "family": "Nectriaceae", "subfamily": ""}	20201030	ncbi	SAMN13683613	GCA_013396185.1	20210414	2020/07/10
fuscof1	Fusarium	coffeatum		{"clade": "sordariomyceta", "kingdom": "Fungi", "phylum": "Ascomycota", "subphylum": "Pezizomycotina", "class": "Sordariomycetes", "subclass": "Hypocreomycetidae", "order": "Hypocreales", "family": "Nectriaceae", "subfamily": ""}	20180713	ncbi	SAMN08667433	GCF_003316985.1	20210414	2018/07/13
fuscoi1	Fusarium	coicis		{"clade": "sordariomyceta", "kingdom": "Fungi", "phylum": "Ascomycota", "subphylum": "Pezizomycotina", "class": "Sordariomycetes", "subclass": "Hypocreomycetidae", "order": "Hypocreales", "family": "Nectriaceae", "subfamily": ""}	20201030	ncbi	SAMN13683595	GCA_013781345.1	20210414	2020/07/27
fuscom1	Fusarium	commune	MPISDFRAT0072	{"clade": "sordariomyceta", "kingdom": "Fungi", "phylum": "Ascomycota", "subphylum": "Pezizomycotina", "class": "Sordariomycetes", "subclass": "Hypocreomycetidae", "order": "Hypocreales", "family": "Nectriaceae", "subfamily": ""}	v1.0	jgi		Fusco1	20210414	Mesny F et al.,2021
fuscul1	Fusarium	culmorum	UK99	{"clade": "sordariomyceta", "kingdom": "Fungi", "phylum": "Ascomycota", "subphylum": "Pezizomycotina", "class": "Sordariomycetes", "subclass": "Hypocreomycetidae", "order": "Hypocreales", "family": "Nectriaceae", "subfamily": ""}	0	jgi	1171801	Fuscu1	20210414	Urban M et al.,2016
fusdec1	Fusarium	decemcellulare		{"clade": "sordariomyceta", "kingdom": "Fungi", "phylum": "Ascomycota", "subphylum": "Pezizomycotina", "class": "Sordariomycetes", "subclass": "Hypocreomycetidae", "order": "Hypocreales", "family": "Nectriaceae", "subfamily": ""}	20201030	ncbi	SAMN13683637	GCA_013266205.1	20210414	2020/06/03
fusden1	Fusarium	denticulatum		{"clade": "sordariomyceta", "kingdom": "Fungi", "phylum": "Ascomycota", "subphylum": "Pezizomycotina", "class": "Sordariomycetes", "subclass": "Hypocreomycetidae", "order": "Hypocreales", "family": "Nectriaceae", "subfamily": ""}	20201030	ncbi	SAMN13683603	GCA_013396175.1	20210414	2020/07/10
fusequ1	Fusarium	equiseti		{"clade": "sordariomyceta", "kingdom": "Fungi", "phylum": "Ascomycota", "subphylum": "Pezizomycotina", "class": "Sordariomycetes", "subclass": "Hypocreomycetidae", "order": "Hypocreales", "family": "Nectriaceae", "subfamily": ""}	2021-07-06	ncbi	fusequ1	GCA_910393935.1	20210914	2021/07/06
fuseuw1.1	Fusarium	euwallaceae		{"clade": "sordariomyceta", "kingdom": "Fungi", "phylum": "Ascomycota", "subphylum": "Pezizomycotina", "class": "Sordariomycetes", "subclass": "Hypocreomycetidae", "order": "Hypocreales", "family": "Nectriaceae", "subfamily": ""}	20181220	ncbi	SAMN05730138	GCA_003957675.1	None	2018/12/20
fusfla1	Fusarium	flagelliforme		{"clade": "sordariomyceta", "kingdom": "Fungi", "phylum": "Ascomycota", "subphylum": "Pezizomycotina", "class": "Sordariomycetes", "subclass": "Hypocreomycetidae", "order": "Hypocreales", "family": "Nectriaceae", "subfamily": ""}	20180822	ncbi	SAMN08631343	GCA_003012295.1	20210414	2018/03/20
fusflo1.1	Fusarium	floridanum		{"clade": "sordariomyceta", "kingdom": "Fungi", "phylum": "Ascomycota", "subphylum": "Pezizomycotina", "class": "Sordariomycetes", "subclass": "Hypocreomycetidae", "order": "Hypocreales", "family": "Nectriaceae", "subfamily": ""}	20181214	ncbi	SAMN07244158	GCA_003947005.1	None	2018/12/14
fusfuj1	Fusarium	fujikuroi	IMI58289	{"clade": "sordariomyceta", "kingdom": "Fungi", "phylum": "Ascomycota", "subphylum": "Pezizomycotina", "class": "Sordariomycetes", "subclass": "Hypocreomycetidae", "order": "Hypocreales", "family": "Nectriaceae", "subfamily": ""}	0	jgi		Fusfu1	20210414	Wiemann P et al.,2013
fusgad1	Fusarium	gaditjirri		{"clade": "sordariomyceta", "kingdom": "Fungi", "phylum": "Ascomycota", "subphylum": "Pezizomycotina", "class": "Sordariomycetes", "subclass": "Hypocreomycetidae", "order": "Hypocreales", "family": "Nectriaceae", "subfamily": ""}	20201030	ncbi	SAMN13683626	GCA_013266175.1	20210414	2020/06/03
fusglo1	Fusarium	globosum		{"clade": "sordariomyceta", "kingdom": "Fungi", "phylum": "Ascomycota", "subphylum": "Pezizomycotina", "class": "Sordariomycetes", "subclass": "Hypocreomycetidae", "order": "Hypocreales", "family": "Nectriaceae", "subfamily": ""}	20201030	ncbi	SAMN13683623	GCA_013396165.1	20210414	2020/07/10
fusgra2	Fusarium	graminearum		{"clade": "sordariomyceta", "kingdom": "Fungi", "phylum": "Ascomycota", "subphylum": "Pezizomycotina", "class": "Sordariomycetes", "subclass": "Hypocreomycetidae", "order": "Hypocreales", "family": "Nectriaceae", "subfamily": ""}	v1.0	jgi		Fusgr1	20210414	Cuomo CA et al.,2007
fusgra3	Fusarium	graminum		{"clade": "sordariomyceta", "kingdom": "Fungi", "phylum": "Ascomycota", "subphylum": "Pezizomycotina", "class": "Sordariomycetes", "subclass": "Hypocreomycetidae", "order": "Hypocreales", "family": "Nectriaceae", "subfamily": ""}	20201231	ncbi	SAMN13683592	GCA_013266165.1	20210414	2020/06/03
fushet1	Fusarium	heterosporum		{"clade": "sordariomyceta", "kingdom": "Fungi", "phylum": "Ascomycota", "subphylum": "Pezizomycotina", "class": "Sordariomycetes", "subclass": "Hypocreomycetidae", "order": "Hypocreales", "family": "Nectriaceae", "subfamily": ""}	20201030	ncbi	SAMN13683593	GCA_013396295.1	20210414	2020/07/10
fuskur1.1	Fusarium	kuroshium		{"clade": "sordariomyceta", "kingdom": "Fungi", "phylum": "Ascomycota", "subphylum": "Pezizomycotina", "class": "Sordariomycetes", "subclass": "Hypocreomycetidae", "order": "Hypocreales", "family": "Nectriaceae", "subfamily": ""}	20181030	ncbi	SAMN07200645	GCA_003698175.1	None	2018/10/30
fuslan1	Fusarium	langsethiae	Fl201059	{"clade": "sordariomyceta", "kingdom": "Fungi", "phylum": "Ascomycota", "subphylum": "Pezizomycotina", "class": "Sordariomycetes", "subclass": "Hypocreomycetidae", "order": "Hypocreales", "family": "Nectriaceae", "subfamily": ""}	0	jgi	485591	Fusla1	20210414	Lysøe E et al.,2016
fuslon1	Fusarium	longipes		{"clade": "sordariomyceta", "kingdom": "Fungi", "phylum": "Ascomycota", "subphylum": "Pezizomycotina", "class": "Sordariomycetes", "subclass": "Hypocreomycetidae", "order": "Hypocreales", "family": "Nectriaceae", "subfamily": ""}	20180904	ncbi	SAMN08631279	GCA_003012285.1	20210414	2018/03/20
fusman1	Fusarium	mangiferae	MRC7560	{"clade": "sordariomyceta", "kingdom": "Fungi", "phylum": "Ascomycota", "subphylum": "Pezizomycotina", "class": "Sordariomycetes", "subclass": "Hypocreomycetidae", "order": "Hypocreales", "family": "Nectriaceae", "subfamily": ""}	0	jgi	911431	Fusma1	20210414	Niehaus EM et al.,2016
fusmex1	Fusarium	mexicanum		{"clade": "sordariomyceta", "kingdom": "Fungi", "phylum": "Ascomycota", "subphylum": "Pezizomycotina", "class": "Sordariomycetes", "subclass": "Hypocreomycetidae", "order": "Hypocreales", "family": "Nectriaceae", "subfamily": ""}	20201030	ncbi	SAMN13683619	GCA_013396015.1	20210414	2020/07/10
fusmun1	Fusarium	mundagurra		{"clade": "sordariomyceta", "kingdom": "Fungi", "phylum": "Ascomycota", "subphylum": "Pezizomycotina", "class": "Sordariomycetes", "subclass": "Hypocreomycetidae", "order": "Hypocreales", "family": "Nectriaceae", "subfamily": ""}	20201030	ncbi	SAMN13683606	GCA_013396205.1	20210414	2020/07/10
fusmus1.1	Fusarium	musae		{"clade": "sordariomyceta", "kingdom": "Fungi", "phylum": "Ascomycota", "subphylum": "Pezizomycotina", "class": "Sordariomycetes", "subclass": "Hypocreomycetidae", "order": "Hypocreales", "family": "Nectriaceae", "subfamily": ""}	2021-09-09	ncbi	fusmus1	GCF_019915245.1	None	2021/09/09
fusnap1	Fusarium	napiforme		{"clade": "sordariomyceta", "kingdom": "Fungi", "phylum": "Ascomycota", "subphylum": "Pezizomycotina", "class": "Sordariomycetes", "subclass": "Hypocreomycetidae", "order": "Hypocreales", "family": "Nectriaceae", "subfamily": ""}	20201030	ncbi	SAMN13683596	GCA_013396005.1	20210414	2020/07/10
fusnyg1	Fusarium	nygamai		{"clade": "sordariomyceta", "kingdom": "Fungi", "phylum": "Ascomycota", "subphylum": "Pezizomycotina", "class": "Sordariomycetes", "subclass": "Hypocreomycetidae", "order": "Hypocreales", "family": "Nectriaceae", "subfamily": ""}	20180122	ncbi	SAMN06240347	GCA_002894225.1	20210414	2018/01/22
fusodo1.1	Fusarium	odoratissimum		{"clade": "sordariomyceta", "kingdom": "Fungi", "phylum": "Ascomycota", "subphylum": "Pezizomycotina", "class": "Sordariomycetes", "subclass": "Hypocreomycetidae", "order": "Hypocreales", "family": "Nectriaceae", "subfamily": ""}	20140811	ncbi	SAMN02981461	GCA_000350365.1	None	2013/04/02
fusoxy17	Fusarium	oxysporum	fspmelonisFoMelonNRRL26406	{"clade": "sordariomyceta", "kingdom": "Fungi", "phylum": "Ascomycota", "subphylum": "Pezizomycotina", "class": "Sordariomycetes", "subclass": "Hypocreomycetidae", "order": "Hypocreales", "family": "Nectriaceae", "subfamily": ""}	0	jgi		Fusoxmel1	20210414	Ma LJ et al.,2014
fusoxy18	Fusarium	oxysporum	fspconglutinansrace254008PHW808	{"clade": "sordariomyceta", "kingdom": "Fungi", "phylum": "Ascomycota", "subphylum": "Pezizomycotina", "class": "Sordariomycetes", "subclass": "Hypocreomycetidae", "order": "Hypocreales", "family": "Nectriaceae", "subfamily": ""}	0	jgi		Fusoxcon1	20210414	DeIulio GA et al.,2018
fusoxy19	Fusarium	oxysporum	fsplycopersiciMN25FoMN25NRRL54003	{"clade": "sordariomyceta", "kingdom": "Fungi", "phylum": "Ascomycota", "subphylum": "Pezizomycotina", "class": "Sordariomycetes", "subclass": "Hypocreomycetidae", "order": "Hypocreales", "family": "Nectriaceae", "subfamily": ""}	0	jgi		Fusoxlyc1	20210414	DeIulio GA et al.,2018
fusoxy2	Fusarium	oxysporum	Fo5176	{"clade": "sordariomyceta", "kingdom": "Fungi", "phylum": "Ascomycota", "subphylum": "Pezizomycotina", "class": "Sordariomycetes", "subclass": "Hypocreomycetidae", "order": "Hypocreales", "family": "Nectriaceae", "subfamily": ""}	v1.0	jgi	8249021	FoxFo5176	20210414	Fokkens L et al.,2020
fusoxy20	Fusarium	oxysporum	Fo47	{"clade": "sordariomyceta", "kingdom": "Fungi", "phylum": "Ascomycota", "subphylum": "Pezizomycotina", "class": "Sordariomycetes", "subclass": "Hypocreomycetidae", "order": "Hypocreales", "family": "Nectriaceae", "subfamily": ""}	0	jgi	394798	FusoxFo47	20210414	DeIulio GA et al.,2018
fusoxy21	Fusarium	oxysporum	fspvasinfectum25433Cotton	{"clade": "sordariomyceta", "kingdom": "Fungi", "phylum": "Ascomycota", "subphylum": "Pezizomycotina", "class": "Sordariomycetes", "subclass": "Hypocreomycetidae", "order": "Hypocreales", "family": "Nectriaceae", "subfamily": ""}	0	jgi		Fusoxvas1	20210414	DeIulio GA et al.,2018
fusoxy22	Fusarium	oxysporum	NRRL32931	{"clade": "sordariomyceta", "kingdom": "Fungi", "phylum": "Ascomycota", "subphylum": "Pezizomycotina", "class": "Sordariomycetes", "subclass": "Hypocreomycetidae", "order": "Hypocreales", "family": "Nectriaceae", "subfamily": ""}	0	jgi		Fusox32931	20210414	DeIulio GA et al.,2018
fusoxy23	Fusarium	oxysporum	fsppisiHDV247	{"clade": "sordariomyceta", "kingdom": "Fungi", "phylum": "Ascomycota", "subphylum": "Pezizomycotina", "class": "Sordariomycetes", "subclass": "Hypocreomycetidae", "order": "Hypocreales", "family": "Nectriaceae", "subfamily": ""}	0	jgi	376928	Fusoxpis1	20210414	Williams AH et al.,2016
fusoxy24	Fusarium	oxysporum	fspcubensetropicalrace454006II5	{"clade": "sordariomyceta", "kingdom": "Fungi", "phylum": "Ascomycota", "subphylum": "Pezizomycotina", "class": "Sordariomycetes", "subclass": "Hypocreomycetidae", "order": "Hypocreales", "family": "Nectriaceae", "subfamily": ""}	0	jgi		Fusoxcub1	20210414	DeIulio GA et al.,2018
fusoxy25	Fusarium	oxysporum	fspradicislycopersici26381CL57	{"clade": "sordariomyceta", "kingdom": "Fungi", "phylum": "Ascomycota", "subphylum": "Pezizomycotina", "class": "Sordariomycetes", "subclass": "Hypocreomycetidae", "order": "Hypocreales", "family": "Nectriaceae", "subfamily": ""}	0	jgi		Fusoxrad1	20210414	DeIulio GA et al.,2018
fusoxy26	Fusarium	oxysporum	fspraphani54005	{"clade": "sordariomyceta", "kingdom": "Fungi", "phylum": "Ascomycota", "subphylum": "Pezizomycotina", "class": "Sordariomycetes", "subclass": "Hypocreomycetidae", "order": "Hypocreales", "family": "Nectriaceae", "subfamily": ""}	0	jgi	376868	Fusoxrap1	20210414	DeIulio GA et al.,2018
fusoxy28	Fusarium	oxysporum	MPICAGECH0212	{"clade": "sordariomyceta", "kingdom": "Fungi", "phylum": "Ascomycota", "subphylum": "Pezizomycotina", "class": "Sordariomycetes", "subclass": "Hypocreomycetidae", "order": "Hypocreales", "family": "Nectriaceae", "subfamily": ""}	v1.0	jgi		Fusoxys1	20210414	Mesny F et al.,2021
fusoxy29	Fusarium	oxysporum	MPISDFRAT0094	{"clade": "sordariomyceta", "kingdom": "Fungi", "phylum": "Ascomycota", "subphylum": "Pezizomycotina", "class": "Sordariomycetes", "subclass": "Hypocreomycetidae", "order": "Hypocreales", "family": "Nectriaceae", "subfamily": ""}	v1.0	jgi		Fusoxy1	20210414	Mesny F et al.,2021
fusoxy3	Fusarium	oxysporum	Fo47	{"clade": "sordariomyceta", "kingdom": "Fungi", "phylum": "Ascomycota", "subphylum": "Pezizomycotina", "class": "Sordariomycetes", "subclass": "Hypocreomycetidae", "order": "Hypocreales", "family": "Nectriaceae", "subfamily": ""}	v2.0	jgi	394798	FusoxFo47_2	20210414	Wang B et al.,2020
fusoxy30	Fusarium	oxysporum	fsplycopersici4287v2	{"clade": "sordariomyceta", "kingdom": "Fungi", "phylum": "Ascomycota", "subphylum": "Pezizomycotina", "class": "Sordariomycetes", "subclass": "Hypocreomycetidae", "order": "Hypocreales", "family": "Nectriaceae", "subfamily": ""}	0	jgi		Fusox2	20210414	Ma LJ et al.,2010
fusoxy32	Fusarium	oxysporum	fspconglutinans	{"clade": "sordariomyceta", "kingdom": "Fungi", "phylum": "Ascomycota", "subphylum": "Pezizomycotina", "class": "Sordariomycetes", "subclass": "Hypocreomycetidae", "order": "Hypocreales", "family": "Nectriaceae", "subfamily": ""}	2020-08-13 00:00:00	ncbi	fusoxy32	GCA_014154955.1	20210421	2020/08/11
fusoxy33	Fusarium	oxysporum	fspcubense	{"clade": "sordariomyceta", "kingdom": "Fungi", "phylum": "Ascomycota", "subphylum": "Pezizomycotina", "class": "Sordariomycetes", "subclass": "Hypocreomycetidae", "order": "Hypocreales", "family": "Nectriaceae", "subfamily": ""}	2019-08-13 00:00:00	ncbi	fusoxy33	GCA_007994515.1	20210421	2019/08/13
fusoxy34	Fusarium	oxysporum	fspcubense	{"clade": "sordariomyceta", "kingdom": "Fungi", "phylum": "Ascomycota", "subphylum": "Pezizomycotina", "class": "Sordariomycetes", "subclass": "Hypocreomycetidae", "order": "Hypocreales", "family": "Nectriaceae", "subfamily": ""}	2019-08-01 00:00:00	ncbi	fusoxy34	GCA_005930515.1	20210421	2019/06/03
fusoxy35	Fusarium	oxysporum	fspnarcissi	{"clade": "sordariomyceta", "kingdom": "Fungi", "phylum": "Ascomycota", "subphylum": "Pezizomycotina", "class": "Sordariomycetes", "subclass": "Hypocreomycetidae", "order": "Hypocreales", "family": "Nectriaceae", "subfamily": ""}	2019-02-06 00:00:00	ncbi	fusoxy35	GCA_004141715.1	20210421	2019/02/06
fusoxy36	Fusarium	oxysporum	fspcepae	{"clade": "sordariomyceta", "kingdom": "Fungi", "phylum": "Ascomycota", "subphylum": "Pezizomycotina", "class": "Sordariomycetes", "subclass": "Hypocreomycetidae", "order": "Hypocreales", "family": "Nectriaceae", "subfamily": ""}	2018-10-05 00:00:00	ncbi	fusoxy36	GCA_003615075.1	20210421	2018/10/05
fusoxy37	Fusarium	oxysporum	fspcepae	{"clade": "sordariomyceta", "kingdom": "Fungi", "phylum": "Ascomycota", "subphylum": "Pezizomycotina", "class": "Sordariomycetes", "subclass": "Hypocreomycetidae", "order": "Hypocreales", "family": "Nectriaceae", "subfamily": ""}	2018-10-05 00:00:00	ncbi	fusoxy37	GCA_003615095.1	20210421	2018/10/05
fusoxy38	Fusarium	oxysporum	fspcepae	{"clade": "sordariomyceta", "kingdom": "Fungi", "phylum": "Ascomycota", "subphylum": "Pezizomycotina", "class": "Sordariomycetes", "subclass": "Hypocreomycetidae", "order": "Hypocreales", "family": "Nectriaceae", "subfamily": ""}	2018-10-05 00:00:00	ncbi	fusoxy38	GCA_003615085.1	20210421	2018/10/05
fusoxy4	Fusarium	oxysporum	fspalbedinisisolate9	{"clade": "sordariomyceta", "kingdom": "Fungi", "phylum": "Ascomycota", "subphylum": "Pezizomycotina", "class": "Sordariomycetes", "subclass": "Hypocreomycetidae", "order": "Hypocreales", "family": "Nectriaceae", "subfamily": ""}	v1.0	jgi		Fusoxalb1	20210414	Khoulassa S et al.,2022
fusoxy40	Fusarium	oxysporum	fspradiciscucumerinum	{"clade": "sordariomyceta", "kingdom": "Fungi", "phylum": "Ascomycota", "subphylum": "Pezizomycotina", "class": "Sordariomycetes", "subclass": "Hypocreomycetidae", "order": "Hypocreales", "family": "Nectriaceae", "subfamily": ""}	2017-09-25 00:00:00	ncbi	fusoxy40	GCA_001702695.2	20210421	2016/08/10
fusoxy42.1	Fusarium	oxysporum	fspcubenserace1	{"clade": "sordariomyceta", "kingdom": "Fungi", "phylum": "Ascomycota", "subphylum": "Pezizomycotina", "class": "Sordariomycetes", "subclass": "Hypocreomycetidae", "order": "Hypocreales", "family": "Nectriaceae", "subfamily": ""}	2014-08-11 00:00:00	ncbi	fusoxy42	GCA_000350345.1	None	2013/04/02
fusoxy43	Fusarium	oxysporum	fspconglutinans	{"clade": "sordariomyceta", "kingdom": "Fungi", "phylum": "Ascomycota", "subphylum": "Pezizomycotina", "class": "Sordariomycetes", "subclass": "Hypocreomycetidae", "order": "Hypocreales", "family": "Nectriaceae", "subfamily": ""}	2021-06-16	ncbi	fusoxy43	GCA_018894095.1	20210709	2021/06/16
fusoxy44	Fusarium	oxysporum	fsprapae	{"clade": "sordariomyceta", "kingdom": "Fungi", "phylum": "Ascomycota", "subphylum": "Pezizomycotina", "class": "Sordariomycetes", "subclass": "Hypocreomycetidae", "order": "Hypocreales", "family": "Nectriaceae", "subfamily": ""}	2021-07-07	ncbi	fusoxy44	GCA_019157295.1	20210914	2021/07/07
fusoxy45	Fusarium	oxysporum	fspraphani	{"clade": "sordariomyceta", "kingdom": "Fungi", "phylum": "Ascomycota", "subphylum": "Pezizomycotina", "class": "Sordariomycetes", "subclass": "Hypocreomycetidae", "order": "Hypocreales", "family": "Nectriaceae", "subfamily": ""}	2021-07-07	ncbi	fusoxy45	GCA_019157275.1	20210914	2021/07/07
fusoxy46	Fusarium	oxysporum	fspmatthiolae	{"clade": "sordariomyceta", "kingdom": "Fungi", "phylum": "Ascomycota", "subphylum": "Pezizomycotina", "class": "Sordariomycetes", "subclass": "Hypocreomycetidae", "order": "Hypocreales", "family": "Nectriaceae", "subfamily": ""}	2021-11-08	ncbi	fusoxy46	GCA_020796175.1	20211117	2021/11/08
fusoxy52.1	Fusarium	oxysporum	fsplycopersici4287	{"clade": "sordariomyceta", "kingdom": "Fungi", "phylum": "Ascomycota", "subphylum": "Pezizomycotina", "class": "Sordariomycetes", "subclass": "Hypocreomycetidae", "order": "Hypocreales", "family": "Nectriaceae", "subfamily": ""}	2016-09-26	ncbi	fusoxy52	GCF_000149955.1	None	2008/11/21
fusphy1	Fusarium	phyllophilum		{"clade": "sordariomyceta", "kingdom": "Fungi", "phylum": "Ascomycota", "subphylum": "Pezizomycotina", "class": "Sordariomycetes", "subclass": "Hypocreomycetidae", "order": "Hypocreales", "family": "Nectriaceae", "subfamily": ""}	20201030	ncbi	SAMN13683607	GCA_013396025.1	20210414	2020/07/10
fuspoa1	Fusarium	poae	2516	{"clade": "sordariomyceta", "kingdom": "Fungi", "phylum": "Ascomycota", "subphylum": "Pezizomycotina", "class": "Sordariomycetes", "subclass": "Hypocreomycetidae", "order": "Hypocreales", "family": "Nectriaceae", "subfamily": ""}	0	jgi	762841	Fuspo1	20210414	Vanheule A et al.,2016
fuspro1	Fusarium	proliferatum	ET1	{"clade": "sordariomyceta", "kingdom": "Fungi", "phylum": "Ascomycota", "subphylum": "Pezizomycotina", "class": "Sordariomycetes", "subclass": "Hypocreomycetidae", "order": "Hypocreales", "family": "Nectriaceae", "subfamily": ""}	0	jgi	911361	Fuspro1	20210414	Niehaus EM et al.,2016
fuspse1	Fusarium	pseudograminearum	CS3096	{"clade": "sordariomyceta", "kingdom": "Fungi", "phylum": "Ascomycota", "subphylum": "Pezizomycotina", "class": "Sordariomycetes", "subclass": "Hypocreomycetidae", "order": "Hypocreales", "family": "Nectriaceae", "subfamily": ""}	0	jgi	439398	Fusps1	20210414	Gardiner DM et al.,2012
fuspse2	Fusarium	pseudocircinatum		{"clade": "sordariomyceta", "kingdom": "Fungi", "phylum": "Ascomycota", "subphylum": "Pezizomycotina", "class": "Sordariomycetes", "subclass": "Hypocreomycetidae", "order": "Hypocreales", "family": "Nectriaceae", "subfamily": ""}	20201030	ncbi	SAMN13683604	GCA_013396035.1	20210414	2020/07/10
fuspse3	Fusarium	pseudoanthophilum		{"clade": "sordariomyceta", "kingdom": "Fungi", "phylum": "Ascomycota", "subphylum": "Pezizomycotina", "class": "Sordariomycetes", "subclass": "Hypocreomycetidae", "order": "Hypocreales", "family": "Nectriaceae", "subfamily": ""}	20201030	ncbi	SAMN13683600	GCA_013395995.1	20210414	2020/07/10
fusred1	Fusarium	redolens	MPICAGEAT0023	{"clade": "sordariomyceta", "kingdom": "Fungi", "phylum": "Ascomycota", "subphylum": "Pezizomycotina", "class": "Sordariomycetes", "subclass": "Hypocreomycetidae", "order": "Hypocreales", "family": "Nectriaceae", "subfamily": ""}	v1.0	jgi		Fusre1	20210414	Mesny F et al.,2021
fussar1	Fusarium	sarcochroum		{"clade": "sordariomyceta", "kingdom": "Fungi", "phylum": "Ascomycota", "subphylum": "Pezizomycotina", "class": "Sordariomycetes", "subclass": "Hypocreomycetidae", "order": "Hypocreales", "family": "Nectriaceae", "subfamily": ""}	20201030	ncbi	SAMN13683633	GCA_013266185.1	20210414	2020/06/03
fussol1	Fusarium	solani	FSSC5	{"clade": "sordariomyceta", "kingdom": "Fungi", "phylum": "Ascomycota", "subphylum": "Pezizomycotina", "class": "Sordariomycetes", "subclass": "Hypocreomycetidae", "order": "Hypocreales", "family": "Nectriaceae", "subfamily": ""}	v1.0	jgi		Fusso1	20210414	Mesny F et al.,2021
fussp.10	Fusarium	sp.	AF6	{"clade": "sordariomyceta", "kingdom": "Fungi", "phylum": "Ascomycota", "subphylum": "Pezizomycotina", "class": "Sordariomycetes", "subclass": "Hypocreomycetidae", "order": "Hypocreales", "family": "Nectriaceae", "subfamily": ""}	2018-12-14 00:00:00	ncbi	fussp.10	GCA_003947015.1	20210421	2018/12/14
fussp.2	Fusarium	sp.	FIESC12MPICAGEAA0113	{"clade": "sordariomyceta", "kingdom": "Fungi", "phylum": "Ascomycota", "subphylum": "Pezizomycotina", "class": "Sordariomycetes", "subclass": "Hypocreomycetidae", "order": "Hypocreales", "family": "Nectriaceae", "subfamily": ""}	v1.0	jgi		Fuseq1	20210414	Mesny F et al.,2021
fussp.4	Fusarium	sp.	DS682	{"clade": "sordariomyceta", "kingdom": "Fungi", "phylum": "Ascomycota", "subphylum": "Pezizomycotina", "class": "Sordariomycetes", "subclass": "Hypocreomycetidae", "order": "Hypocreales", "family": "Nectriaceae", "subfamily": ""}	2021-01-07 00:00:00	ncbi	fussp.4	GCA_014764975.1	20210421	2020/09/28
fussp.5	Fusarium	sp.	NRRL25303	{"clade": "sordariomyceta", "kingdom": "Fungi", "phylum": "Ascomycota", "subphylum": "Pezizomycotina", "class": "Sordariomycetes", "subclass": "Hypocreomycetidae", "order": "Hypocreales", "family": "Nectriaceae", "subfamily": ""}	2020-10-30 00:00:00	ncbi	fussp.5	GCA_013396255.1	20210421	2020/07/10
fussp.6	Fusarium	sp.	NRRL66182	{"clade": "sordariomyceta", "kingdom": "Fungi", "phylum": "Ascomycota", "subphylum": "Pezizomycotina", "class": "Sordariomycetes", "subclass": "Hypocreomycetidae", "order": "Hypocreales", "family": "Nectriaceae", "subfamily": ""}	2020-10-30 00:00:00	ncbi	fussp.6	GCA_013266265.1	20210421	2020/06/03
fussp.7	Fusarium	sp.	NRRL52700	{"clade": "sordariomyceta", "kingdom": "Fungi", "phylum": "Ascomycota", "subphylum": "Pezizomycotina", "class": "Sordariomycetes", "subclass": "Hypocreomycetidae", "order": "Hypocreales", "family": "Nectriaceae", "subfamily": ""}	2020-10-30 00:00:00	ncbi	fussp.7	GCA_013396095.1	20210421	2020/07/10
fussp.8	Fusarium	sp.	AF4	{"clade": "sordariomyceta", "kingdom": "Fungi", "phylum": "Ascomycota", "subphylum": "Pezizomycotina", "class": "Sordariomycetes", "subclass": "Hypocreomycetidae", "order": "Hypocreales", "family": "Nectriaceae", "subfamily": ""}	2018-12-14 00:00:00	ncbi	fussp.8	GCA_003946995.1	20210421	2018/12/14
fussp.9	Fusarium	sp.	AF8	{"clade": "sordariomyceta", "kingdom": "Fungi", "phylum": "Ascomycota", "subphylum": "Pezizomycotina", "class": "Sordariomycetes", "subclass": "Hypocreomycetidae", "order": "Hypocreales", "family": "Nectriaceae", "subfamily": ""}	2018-12-14 00:00:00	ncbi	fussp.9	GCA_003946985.1	20210421	2018/12/14
fusspo1	Fusarium	sporotrichioides		{"clade": "sordariomyceta", "kingdom": "Fungi", "phylum": "Ascomycota", "subphylum": "Pezizomycotina", "class": "Sordariomycetes", "subclass": "Hypocreomycetidae", "order": "Hypocreales", "family": "Nectriaceae", "subfamily": ""}	20180904	ncbi	SAMN08631227	GCA_003012315.1	20210414	2018/03/20
fussub1	Fusarium	subglutinans		{"clade": "sordariomyceta", "kingdom": "Fungi", "phylum": "Ascomycota", "subphylum": "Pezizomycotina", "class": "Sordariomycetes", "subclass": "Hypocreomycetidae", "order": "Hypocreales", "family": "Nectriaceae", "subfamily": ""}	20201030	ncbi	SAMN13683616	GCF_013396075.1	20210414	2020/07/10
fustja1	Fusarium	tjaetaba		{"clade": "sordariomyceta", "kingdom": "Fungi", "phylum": "Ascomycota", "subphylum": "Pezizomycotina", "class": "Sordariomycetes", "subclass": "Hypocreomycetidae", "order": "Hypocreales", "family": "Nectriaceae", "subfamily": ""}	20201030	ncbi	SAMN13683597	GCF_013396195.1	20210414	2020/07/10
fustri1	Fusarium	tricinctum	MPISDFRAT0044	{"clade": "sordariomyceta", "kingdom": "Fungi", "phylum": "Ascomycota", "subphylum": "Pezizomycotina", "class": "Sordariomycetes", "subclass": "Hypocreomycetidae", "order": "Hypocreales", "family": "Nectriaceae", "subfamily": ""}	v1.0	jgi		Fustri1	20210414	Mesny F et al.,2021
fustri2	Fusarium	tricinctum	MPISDFRAT0068	{"clade": "sordariomyceta", "kingdom": "Fungi", "phylum": "Ascomycota", "subphylum": "Pezizomycotina", "class": "Sordariomycetes", "subclass": "Hypocreomycetidae", "order": "Hypocreales", "family": "Nectriaceae", "subfamily": ""}	v1.0	jgi		Fustr1	20210414	Mesny F et al.,2021
fusvan1	Fusarium	vanettenii	77134	{"clade": "sordariomyceta", "kingdom": "Fungi", "phylum": "Ascomycota", "subphylum": "Pezizomycotina", "class": "Sordariomycetes", "subclass": "Hypocreomycetidae", "order": "Hypocreales", "family": "Nectriaceae", "subfamily": ""}	20140801	ncbi	SAMN02746079	GCF_000151355.1	20210414	2009/08/24
fusven1	Fusarium	venenatum	MPICAGECH0201	{"clade": "sordariomyceta", "kingdom": "Fungi", "phylum": "Ascomycota", "subphylum": "Pezizomycotina", "class": "Sordariomycetes", "subclass": "Hypocreomycetidae", "order": "Hypocreales", "family": "Nectriaceae", "subfamily": ""}	v1.0	jgi		Fusven1	20210414	Mesny F et al.,2021
fusver1	Fusarium	verticillioides	7600v2	{"clade": "sordariomyceta", "kingdom": "Fungi", "phylum": "Ascomycota", "subphylum": "Pezizomycotina", "class": "Sordariomycetes", "subclass": "Hypocreomycetidae", "order": "Hypocreales", "family": "Nectriaceae", "subfamily": ""}	0	jgi		Fusve2	20210421	Ma LJ et al.,2010~Cuomo CA et al.,2007
fusver2.1	Fusarium	verticillioides	7600	{"clade": "sordariomyceta", "kingdom": "Fungi", "phylum": "Ascomycota", "subphylum": "Pezizomycotina", "class": "Sordariomycetes", "subclass": "Hypocreomycetidae", "order": "Hypocreales", "family": "Nectriaceae", "subfamily": ""}	2016-03-14 00:00:00	ncbi	fusver2	GCF_000149555.1	None	2005/10/18
fusxyl1	Fusarium	xylarioides		{"clade": "sordariomyceta", "kingdom": "Fungi", "phylum": "Ascomycota", "subphylum": "Pezizomycotina", "class": "Sordariomycetes", "subclass": "Hypocreomycetidae", "order": "Hypocreales", "family": "Nectriaceae", "subfamily": ""}	2021-05-06	ncbi	fusxyl1	GCA_018296245.1	20210709	2021/05/06
fusxyl2	Fusarium	xylarioides		{"clade": "sordariomyceta", "kingdom": "Fungi", "phylum": "Ascomycota", "subphylum": "Pezizomycotina", "class": "Sordariomycetes", "subclass": "Hypocreomycetidae", "order": "Hypocreales", "family": "Nectriaceae", "subfamily": ""}	2021-05-06	ncbi	fusxyl2	GCA_018296345.1	20210709	2021/05/06
fusxyl3	Fusarium	xylarioides		{"clade": "sordariomyceta", "kingdom": "Fungi", "phylum": "Ascomycota", "subphylum": "Pezizomycotina", "class": "Sordariomycetes", "subclass": "Hypocreomycetidae", "order": "Hypocreales", "family": "Nectriaceae", "subfamily": ""}	2021-05-06	ncbi	fusxyl3	GCA_018296285.1	20210709	2021/05/06
fusxyl4	Fusarium	xylarioides		{"clade": "sordariomyceta", "kingdom": "Fungi", "phylum": "Ascomycota", "subphylum": "Pezizomycotina", "class": "Sordariomycetes", "subclass": "Hypocreomycetidae", "order": "Hypocreales", "family": "Nectriaceae", "subfamily": ""}	2021-05-06	ncbi	fusxyl4	GCA_018296305.1	20210709	2021/05/06
fusxyl5	Fusarium	xylarioides		{"clade": "sordariomyceta", "kingdom": "Fungi", "phylum": "Ascomycota", "subphylum": "Pezizomycotina", "class": "Sordariomycetes", "subclass": "Hypocreomycetidae", "order": "Hypocreales", "family": "Nectriaceae", "subfamily": ""}	2021-05-06	ncbi	fusxyl5	GCA_018296265.1	20210709	2021/05/06
fusxyl6	Fusarium	xylarioides		{"clade": "sordariomyceta", "kingdom": "Fungi", "phylum": "Ascomycota", "subphylum": "Pezizomycotina", "class": "Sordariomycetes", "subclass": "Hypocreomycetidae", "order": "Hypocreales", "family": "Nectriaceae", "subfamily": ""}	2021-05-06	ncbi	fusxyl6	GCA_018296325.1	20210709	2021/05/06
fuszea1	Fusarium	zealandicum		{"clade": "sordariomyceta", "kingdom": "Fungi", "phylum": "Ascomycota", "subphylum": "Pezizomycotina", "class": "Sordariomycetes", "subclass": "Hypocreomycetidae", "order": "Hypocreales", "family": "Nectriaceae", "subfamily": ""}	20201030	ncbi	SAMN13683635	GCA_013266195.1	20210414	2020/06/03
gaegra1	Gaeumannomyces	graminis	vartriticiR3111a1	{"clade": "sordariomyceta", "kingdom": "Fungi", "phylum": "Ascomycota", "subphylum": "Pezizomycotina", "class": "Sordariomycetes", "subclass": "Sordariomycetidae", "order": "Magnaporthales", "family": "Magnaporthaceae", "subfamily": ""}	0	jgi		Gaegr1	20210414	Okagaki LH et al.,2015
gaetri1.1	Gaeumannomyces	tritici	R3111a1	{"clade": "sordariomyceta", "kingdom": "Fungi", "phylum": "Ascomycota", "subphylum": "Pezizomycotina", "class": "Sordariomycetes", "subclass": "Sordariomycetidae", "order": "Magnaporthales", "family": "Magnaporthaceae", "subfamily": ""}	20140811	ncbi	SAMN02981249	GCF_000145635.1	None	2010/07/14
galree1.1	Galactomyces	reessii		{"clade": "saccharomyceta", "kingdom": "Fungi", "phylum": "Ascomycota", "subphylum": "Saccharomycotina", "class": "Saccharomycetes", "order": "Saccharomycetales", "family": "Dipodascaceae", "subfamily": ""}	20200609	ncbi	SAMN09862991	GCA_013305925.1	None	2020/06/09
gammul1.1	Gamsiella	multidivaricata		{"clade": "Opisthokonta", "kingdom": "Fungi", "phylum": "Mucoromycota", "subphylum": "Mortierellomycotina", "class": "Mortierellomycetes", "order": "Mortierellales", "family": "Mortierellaceae", "subfamily": ""}	20210104	ncbi	SAMN05720499	GCA_016098015.1	None	2020/12/16
ganbon1	Ganoderma	boninense	G3	{"clade": "Opisthokonta", "kingdom": "Fungi", "phylum": "Basidiomycota", "subphylum": "Agaricomycotina", "class": "Agaricomycetes", "order": "Polyporales", "family": "Polyporaceae", "subfamily": ""}	v1.0	jgi		Ganbon1	None	Utomo C et al.,2018
ganleu1	Ganoderma	leucocontextum	Dai12418	{"clade": "Opisthokonta", "kingdom": "Fungi", "phylum": "Basidiomycota", "subphylum": "Agaricomycotina", "class": "Agaricomycetes", "order": "Polyporales", "family": "Polyporaceae", "subfamily": ""}	v1.0	jgi		Ganleu1	20210914	Sun YF et al.,2022
ganluc1	Ganoderma	lucidum	G2601251	{"clade": "Opisthokonta", "kingdom": "Fungi", "phylum": "Basidiomycota", "subphylum": "Agaricomycotina", "class": "Agaricomycetes", "order": "Polyporales", "family": "Polyporaceae", "subfamily": ""}	v1.0	jgi		Ganluc1	None	Chen S et al.,2012
gansp.1	Ganoderma	sp.	10597SS1	{"clade": "Opisthokonta", "kingdom": "Fungi", "phylum": "Basidiomycota", "subphylum": "Agaricomycotina", "class": "Agaricomycetes", "order": "Polyporales", "family": "Polyporaceae", "subfamily": ""}	v1.0	jgi		Gansp1	20210414	Binder M et al.,2013
gaumor1	Gautieria	morchelliformis	GMNEBST	{"clade": "Opisthokonta", "kingdom": "Fungi", "phylum": "Basidiomycota", "subphylum": "Agaricomycotina", "class": "Agaricomycetes", "subclass": "Phallomycetidae", "order": "Gomphales", "family": "Gautieriaceae", "subfamily": ""}	v1.0	jgi		Gaumor1_1	20210414	Miyauchi S et al.,2020
gelsub1.1	Gelatoporia	subvermispora	B	{"clade": "Opisthokonta", "kingdom": "Fungi", "phylum": "Basidiomycota", "subphylum": "Agaricomycotina", "class": "Agaricomycetes", "order": "Polyporales", "family": "Gelatoporiaceae", "subfamily": ""}	20140811	ncbi	SAMN02981297	GCA_000320605.2	None	2012/04/18
geocan1.1	Geotrichum	candidum		{"clade": "saccharomyceta", "kingdom": "Fungi", "phylum": "Ascomycota", "subphylum": "Saccharomycotina", "class": "Saccharomycetes", "order": "Saccharomycetales", "family": "Dipodascaceae", "subfamily": ""}	20200609	ncbi	SAMN09709542	GCA_013365045.1	None	2020/06/09
geocan2.1	Geotrichum	candidum		{"clade": "saccharomyceta", "kingdom": "Fungi", "phylum": "Ascomycota", "subphylum": "Saccharomycotina", "class": "Saccharomycetes", "order": "Saccharomycetales", "family": "Dipodascaceae", "subfamily": ""}	20200609	ncbi	SAMN09709581	GCA_013305595.1	None	2020/06/09
geocan3.1	Geotrichum	candidum		{"clade": "saccharomyceta", "kingdom": "Fungi", "phylum": "Ascomycota", "subphylum": "Saccharomycotina", "class": "Saccharomycetes", "order": "Saccharomycetales", "family": "Dipodascaceae", "subfamily": ""}	20200609	ncbi	SAMN09709440	GCA_013365125.1	None	2020/06/09
geocan4.1	Geotrichum	candidum		{"clade": "saccharomyceta", "kingdom": "Fungi", "phylum": "Ascomycota", "subphylum": "Saccharomycotina", "class": "Saccharomycetes", "order": "Saccharomycetales", "family": "Dipodascaceae", "subfamily": ""}	20200609	ncbi	SAMN09862943	GCA_013305805.1	None	2020/06/09
geocan5.1	Geotrichum	candidum		{"clade": "saccharomyceta", "kingdom": "Fungi", "phylum": "Ascomycota", "subphylum": "Saccharomycotina", "class": "Saccharomycetes", "order": "Saccharomycetales", "family": "Dipodascaceae", "subfamily": ""}	20200609	ncbi	SAMN09709725	GCA_013365065.1	None	2020/06/09
geocan6.1	Geotrichum	candidum		{"clade": "saccharomyceta", "kingdom": "Fungi", "phylum": "Ascomycota", "subphylum": "Saccharomycotina", "class": "Saccharomycetes", "order": "Saccharomycetales", "family": "Dipodascaceae", "subfamily": ""}	20200915	ncbi	SAMN09709337	GCA_014596635.1	None	2020/09/15
geocan7.1	Geotrichum	candidum		{"clade": "saccharomyceta", "kingdom": "Fungi", "phylum": "Ascomycota", "subphylum": "Saccharomycotina", "class": "Saccharomycetes", "order": "Saccharomycetales", "family": "Dipodascaceae", "subfamily": ""}	20200609	ncbi	SAMN09709489	GCA_013365075.1	None	2020/06/09
geocan8.1	Geotrichum	candidum		{"clade": "saccharomyceta", "kingdom": "Fungi", "phylum": "Ascomycota", "subphylum": "Saccharomycotina", "class": "Saccharomycetes", "order": "Saccharomycetales", "family": "Dipodascaceae", "subfamily": ""}	20150930	ncbi	SAMEA3158493	GCA_001402995.1	None	2014/05/11
geocar1	Geopyxis	carbonaria	DOB1671	{"clade": "saccharomyceta", "kingdom": "Fungi", "phylum": "Ascomycota", "subphylum": "Pezizomycotina", "class": "Pezizomycetes", "order": "Pezizales", "family": "Pyronemataceae", "subfamily": ""}	v1.0	jgi		Geocar1	20210414	Steindorff AS et al.,2022
geomor1	Geosmithia	morbida		{"clade": "sordariomyceta", "kingdom": "Fungi", "phylum": "Ascomycota", "subphylum": "Pezizomycotina", "class": "Sordariomycetes", "subclass": "Hypocreomycetidae", "order": "Hypocreales", "family": "Bionectriaceae", "subfamily": ""}	20200420	ncbi	SAMN13870095	GCF_012550715.1	20210414	2020/04/20
geopyr1	Geosiphon	pyriformis		{"clade": "Opisthokonta", "kingdom": "Fungi", "phylum": "Mucoromycota", "subphylum": "Glomeromycotina", "class": "Glomeromycetes", "order": "Archaeosporales", "family": "Geosiphonaceae", "subfamily": ""}	0	jgi		Geopyr1	20210414	Malar C M et al.,2021
gigmar1	Gigaspora	margarita		{"clade": "Opisthokonta", "kingdom": "Fungi", "phylum": "Mucoromycota", "subphylum": "Glomeromycotina", "class": "Glomeromycetes", "order": "Diversisporales", "family": "Gigasporaceae", "subfamily": ""}	20191230	ncbi	SAMN12878420	GCA_009809945.1	20210414	2019/12/30
gigros1	Gigaspora	rosea		{"clade": "Opisthokonta", "kingdom": "Fungi", "phylum": "Mucoromycota", "subphylum": "Glomeromycotina", "class": "Glomeromycetes", "order": "Diversisporales", "family": "Gigasporaceae", "subfamily": ""}	v1.0	jgi		Gigro1	20210414	Morin E et al.,2019
glaloz1	Glarea	lozoyensis	ATCC20868	{"clade": "sordariomyceta", "kingdom": "Fungi", "phylum": "Ascomycota", "subphylum": "Pezizomycotina", "class": "Leotiomycetes", "order": "Helotiales", "family": "Helotiaceae", "subfamily": ""}	0	jgi		Glalo1	20210414	Chen L et al.,2013
glaloz2.1	Glarea	lozoyensis	74030	{"clade": "sordariomyceta", "kingdom": "Fungi", "phylum": "Ascomycota", "subphylum": "Pezizomycotina", "class": "Leotiomycetes", "order": "Helotiales", "family": "Helotiaceae", "subfamily": ""}	2014-08-04 00:00:00	ncbi	glaloz2	GCA_000238015.2	None	2011/12/14
glocer1.1	Glomus	cerebriforme		{"clade": "Opisthokonta", "kingdom": "Fungi", "phylum": "Mucoromycota", "subphylum": "Glomeromycotina", "class": "Glomeromycetes", "order": "Glomerales", "family": "Glomeraceae", "subfamily": ""}	20210114	ncbi	SAMN08364855	GCA_003550305.1	None	2018/09/12
glocon1	Gloeopeniophorella	convolvens	OM19405	{"clade": "Opisthokonta", "kingdom": "Fungi", "phylum": "Basidiomycota", "subphylum": "Agaricomycotina", "class": "Agaricomycetes", "order": "Russulales", "family": "", "subfamily": ""}	v1.0	jgi		Glocon1	20210414	Looney B et al.,2022
gloste1	Glonium	stellatum	CBS20734	{"clade": "dothideomyceta", "kingdom": "Fungi", "phylum": "Ascomycota", "subphylum": "Pezizomycotina", "class": "Dothideomycetes", "subclass": "Pleosporomycetidae", "family": "Gloniaceae", "order": "", "subfamily": ""}	v1.0	jgi	774551	Glost2	20210414	Peter M et al.,2016
glotra1.1	Gloeophyllum	trabeum	ATCC11539	{"clade": "Opisthokonta", "kingdom": "Fungi", "phylum": "Basidiomycota", "subphylum": "Agaricomycotina", "class": "Agaricomycetes", "order": "Gloeophyllales", "family": "Gloeophyllaceae", "subfamily": ""}	2014-05-06 00:00:00	ncbi	glotra1	GCF_000344685.1	None	2013/03/06
gluame1.1	Glutinoglossum	americanum		{"clade": "leotiomyceta", "kingdom": "Fungi", "phylum": "Ascomycota", "subphylum": "Pezizomycotina", "class": "Geoglossomycetes", "order": "Geoglossales", "family": "Geoglossaceae", "subfamily": ""}	2021-09-21	ncbi	gluame1	GCA_020080175.1	None	2021/09/21
golcic1	Golovinomyces	cichoracearum		{"clade": "sordariomyceta", "kingdom": "Fungi", "phylum": "Ascomycota", "subphylum": "Pezizomycotina", "class": "Leotiomycetes", "order": "Erysiphales", "family": "Erysiphaceae", "subfamily": ""}	20181003	ncbi	SAMN05414051	GCA_003611235.1	20210414	2018/10/03
golcic2	Golovinomyces	cichoracearum		{"clade": "sordariomyceta", "kingdom": "Fungi", "phylum": "Ascomycota", "subphylum": "Pezizomycotina", "class": "Leotiomycetes", "order": "Erysiphales", "family": "Erysiphaceae", "subfamily": ""}	20181003	ncbi	SAMN05414054	GCA_003611195.1	20210414	2018/10/03
golcic3	Golovinomyces	cichoracearum		{"clade": "sordariomyceta", "kingdom": "Fungi", "phylum": "Ascomycota", "subphylum": "Pezizomycotina", "class": "Leotiomycetes", "order": "Erysiphales", "family": "Erysiphaceae", "subfamily": ""}	20181003	ncbi	SAMN05414055	GCA_003611215.1	20210414	2018/10/03
golmag1	Golovinomyces	magnicellulatus		{"clade": "sordariomyceta", "kingdom": "Fungi", "phylum": "Ascomycota", "subphylum": "Pezizomycotina", "class": "Leotiomycetes", "order": "Erysiphales", "family": "Erysiphaceae", "subfamily": ""}	20190711	ncbi	SAMN11554066	GCA_006912115.1	20210414	2019/07/11
gomame1.1	Gomphillus	americanus		{"clade": "OSLEUM clade", "kingdom": "Fungi", "phylum": "Ascomycota", "subphylum": "Pezizomycotina", "class": "Lecanoromycetes", "subclass": "Ostropomycetidae", "order": "Ostropales", "family": "Graphidaceae", "subfamily": "Gomphilloideae"}	2021-03-19	ncbi	gomame1	GCA_905337335.1	None	2021/03/19
grascr1	Graphis	scripta	CBS132367	{"clade": "OSLEUM clade", "kingdom": "Fungi", "phylum": "Ascomycota", "subphylum": "Pezizomycotina", "class": "Lecanoromycetes", "subclass": "Ostropomycetidae", "order": "Ostropales", "family": "Graphidaceae", "subfamily": "Graphidoideae", "tribe": "Graphideae"}	0	jgi		Grascr1	20210414	McDonald TR et al.,2013
grocla1	Grosmannia	clavigera	kw1407	{"clade": "sordariomyceta", "kingdom": "Fungi", "phylum": "Ascomycota", "subphylum": "Pezizomycotina", "class": "Sordariomycetes", "subclass": "Sordariomycetidae", "order": "Ophiostomatales", "family": "Ophiostomataceae", "subfamily": ""}	0	jgi	242508	Grocl1	20210414	DiGuistini S et al.,2011
grycys1.1	Gryganskiella	cystojenkinii		{"clade": "Opisthokonta", "kingdom": "Fungi", "phylum": "Mucoromycota", "subphylum": "Mortierellomycotina", "class": "Mortierellomycetes", "order": "Mortierellales", "family": "Mortierellaceae", "subfamily": ""}	20210104	ncbi	SAMN05720522	GCA_015852425.1	None	2020/12/08
guynec1	Guyanagaster	necrorhizus	MCA3950	{"clade": "Opisthokonta", "kingdom": "Fungi", "phylum": "Basidiomycota", "subphylum": "Agaricomycotina", "class": "Agaricomycetes", "subclass": "Agaricomycetidae", "order": "Agaricales", "family": "Physalacriaceae", "subfamily": ""}	v1.0	jgi		Guyne1	20210414	Koch RA et al.,2021
gymand1	Gymnopus	androsaceus	JB14	{"clade": "Opisthokonta", "kingdom": "Fungi", "phylum": "Basidiomycota", "subphylum": "Agaricomycotina", "class": "Agaricomycetes", "subclass": "Agaricomycetidae", "order": "Agaricales", "family": "Omphalotaceae", "subfamily": ""}	v1.0	jgi		Gyman1	20210414	Barbi F et al.,2020
gymcon1	Gymnopus	confluens		{"clade": "Opisthokonta", "kingdom": "Fungi", "phylum": "Basidiomycota", "subphylum": "Agaricomycotina", "class": "Agaricomycetes", "subclass": "Agaricomycetidae", "order": "Agaricales", "family": "Omphalotaceae", "subfamily": ""}	20200623	ncbi	SAMN10245929	GCA_013368555.1	20210414	2020/06/23
gymdil1	Gymnopilus	dilepis		{"clade": "Opisthokonta", "kingdom": "Fungi", "phylum": "Basidiomycota", "subphylum": "Agaricomycotina", "class": "Agaricomycetes", "subclass": "Agaricomycetidae", "order": "Agaricales", "family": "Cortinariaceae", "subfamily": ""}	20180508	ncbi	SAMN07169108	GCA_002938385.1	20210414	2018/02/22
gymjun1	Gymnopilus	junonius	AH44721	{"clade": "Opisthokonta", "kingdom": "Fungi", "phylum": "Basidiomycota", "subphylum": "Agaricomycotina", "class": "Agaricomycetes", "subclass": "Agaricomycetidae", "order": "Agaricales", "family": "Cortinariaceae", "subfamily": ""}	v1.0	jgi		Gymjun1	20210414	Ruiz-Dueñas FJ et al.,2021
gymlux1	Gymnopus	luxurians	FD317M1	{"clade": "Opisthokonta", "kingdom": "Fungi", "phylum": "Basidiomycota", "subphylum": "Agaricomycotina", "class": "Agaricomycetes", "subclass": "Agaricomycetidae", "order": "Agaricales", "family": "Omphalotaceae", "subfamily": ""}	20220812	ncbi	SAMN00631608	GCA_000827265.1	None	2015/01/21
gyrliv1	Gyrodon	lividus	BX	{"clade": "Opisthokonta", "kingdom": "Fungi", "phylum": "Basidiomycota", "subphylum": "Agaricomycotina", "class": "Agaricomycetes", "subclass": "Agaricomycetidae", "order": "Boletales", "suborder": "Paxilineae", "family": "Gyrodontaceae", "subfamily": ""}	v1.0	jgi	8569341	Gyrli1	20210414	Miyauchi S et al.,2020
hammag1	Hamiltosporidium	magnivora		{"clade": "Opisthokonta", "kingdom": "Fungi", "phylum": "Microsporidia", "suborder": "Pansporoblastina", "family": "Dubosqiidae", "subphylum": "", "class": "", "order": "", "subfamily": ""}	20190305	ncbi	SAMN08098114	GCA_004325065.1	20210414	2019/03/05
hamtva1	Hamiltosporidium	tvaerminnensis		{"clade": "Opisthokonta", "kingdom": "Fungi", "phylum": "Microsporidia", "suborder": "Pansporoblastina", "family": "Dubosqiidae", "subphylum": "", "class": "", "order": "", "subfamily": ""}	20190305	ncbi	SAMN08098116	GCA_004325075.1	20210414	2019/03/05
hamtva2	Hamiltosporidium	tvaerminnensis		{"clade": "Opisthokonta", "kingdom": "Fungi", "phylum": "Microsporidia", "suborder": "Pansporoblastina", "family": "Dubosqiidae", "subphylum": "", "class": "", "order": "", "subfamily": ""}	20190305	ncbi	SAMN08098115	GCA_004325045.1	20210414	2019/03/05
hangui1	Hanseniaspora	guilliermondii	UTAD222	{"clade": "saccharomyceta", "kingdom": "Fungi", "phylum": "Ascomycota", "subphylum": "Saccharomycotina", "class": "Saccharomycetes", "order": "Saccharomycetales", "family": "Saccharomycodaceae", "subfamily": ""}	0	jgi		Hangu1	20210414	Seixas I et al.,2019
hanopu1	Hanseniaspora	opuntiae	AWRI3578	{"clade": "saccharomyceta", "kingdom": "Fungi", "phylum": "Ascomycota", "subphylum": "Saccharomycotina", "class": "Saccharomycetes", "order": "Saccharomycetales", "family": "Saccharomycodaceae", "subfamily": ""}	0	jgi	804141	Hanop1	20210414	Sternes PR et al.,2016
hanosm1	Hanseniaspora	osmophila	AWRI3579	{"clade": "saccharomyceta", "kingdom": "Fungi", "phylum": "Ascomycota", "subphylum": "Saccharomycotina", "class": "Saccharomycetes", "order": "Saccharomycetales", "family": "Saccharomycodaceae", "subfamily": ""}	0	jgi	802391	Hanos1	20210414	Sternes PR et al.,2016
hanuva1	Hanseniaspora	uvarum	AWRI3580	{"clade": "saccharomyceta", "kingdom": "Fungi", "phylum": "Ascomycota", "subphylum": "Saccharomycotina", "class": "Saccharomycetes", "order": "Saccharomycetales", "family": "Saccharomycodaceae", "subfamily": ""}	0	jgi	802401	Hanuv1	20210421	Sternes PR et al.,2016
hanval1	Hanseniaspora	valbyensis	NRRLY1626	{"clade": "saccharomyceta", "kingdom": "Fungi", "phylum": "Ascomycota", "subphylum": "Saccharomycotina", "class": "Saccharomycetes", "order": "Saccharomycetales", "family": "Saccharomycodaceae", "subfamily": ""}	v1.1	jgi		Hanva1_1	20210414	Riley R et al.,2016
hapbis1.1	Haplosporangium	bisporale		{"clade": "Opisthokonta", "kingdom": "Fungi", "phylum": "Mucoromycota", "subphylum": "Mortierellomycotina", "class": "Mortierellomycetes", "order": "Mortierellales", "family": "Mortierellaceae", "subfamily": ""}	20210104	ncbi	SAMN05727890	GCA_015500155.1	None	2020/11/16
hapgra1.1	Haplosporangium	gracile		{"clade": "Opisthokonta", "kingdom": "Fungi", "phylum": "Mucoromycota", "subphylum": "Mortierellomycotina", "class": "Mortierellomycetes", "order": "Mortierellales", "family": "Mortierellaceae", "subfamily": ""}	20210104	ncbi	SAMN05727885	GCA_015499985.1	None	2020/11/16
hapsp.1	Haplosporangium	sp.	Z767	{"clade": "Opisthokonta", "kingdom": "Fungi", "phylum": "Mucoromycota", "subphylum": "Mortierellomycotina", "class": "Mortierellomycetes", "order": "Mortierellales", "family": "Mortierellaceae", "subfamily": ""}	20210104	ncbi	SAMN05727887	GCA_015529515.1	20210414	2020/11/17
hapsp.2	Haplosporangium	sp.	Z11	{"clade": "Opisthokonta", "kingdom": "Fungi", "phylum": "Mucoromycota", "subphylum": "Mortierellomycotina", "class": "Mortierellomycetes", "order": "Mortierellales", "family": "Mortierellaceae", "subfamily": ""}	20210104	ncbi	SAMN05727889	GCA_015529505.1	20210414	2020/11/17
hapsp.3	Haplosporangium	sp.	Z27	{"clade": "Opisthokonta", "kingdom": "Fungi", "phylum": "Mucoromycota", "subphylum": "Mortierellomycotina", "class": "Mortierellomycetes", "order": "Mortierellales", "family": "Mortierellaceae", "subfamily": ""}	20210104	ncbi	SAMN05727888	GCA_015529795.1	20210414	2020/11/17
hebcyl1	Hebeloma	cylindrosporum	h7	{"clade": "Opisthokonta", "kingdom": "Fungi", "phylum": "Basidiomycota", "subphylum": "Agaricomycotina", "class": "Agaricomycetes", "subclass": "Agaricomycetidae", "order": "Agaricales", "family": "Cortinariaceae", "subfamily": ""}	v2.0	jgi		Hebcy2	20210414	Kohler A et al.,2015~Doré J et al.,2015~Doré J et al.,2017
helgri1	Helicocarpus	griseus	UAMH5409	{"clade": "leotiomyceta", "kingdom": "Fungi", "phylum": "Ascomycota", "subphylum": "Pezizomycotina", "class": "Eurotiomycetes", "subclass": "Eurotiomycetidae", "order": "Onygenales", "family": "Ajellomycetaceae", "subfamily": ""}	0	jgi		Helgr1	20210414	Muñoz JF et al.,2018
helsp.4	Helotiales	sp.	DMIDodQoI	{"clade": "sordariomyceta", "kingdom": "Fungi", "phylum": "Ascomycota", "subphylum": "Pezizomycotina", "class": "Leotiomycetes", "order": "", "family": "", "subfamily": ""}	2020-04-20 00:00:00	ncbi	helsp.4	GCA_009613015.1	20210421	2019/11/06
helsul1	Heliocybe	sulcata	OMC1185	{"clade": "Opisthokonta", "kingdom": "Fungi", "phylum": "Basidiomycota", "subphylum": "Agaricomycotina", "class": "Agaricomycetes", "order": "Gloeophyllales", "family": "", "subfamily": ""}	v1.0	jgi		Helsul1	20210414	Varga T et al.,2019
heralp1	Hericium	alpestre		{"clade": "Opisthokonta", "kingdom": "Fungi", "phylum": "Basidiomycota", "subphylum": "Agaricomycotina", "class": "Agaricomycetes", "order": "Russulales", "family": "Hericiaceae", "subfamily": ""}	20190405	ncbi	SAMN10873417	GCA_004681135.1	20210414	2019/04/05
hesves1	Hesseltinella	vesiculosa	NRRL3301	{"clade": "Opisthokonta", "kingdom": "Fungi", "phylum": "Mucoromycota", "subphylum": "Mucoromycotina", "class": "Mucoromycetes", "order": "Mucorales", "family": "Cunninghamellaceae", "subfamily": ""}	v2.0	jgi		Hesve2finisherSC	20210414	Mondo SJ et al.,2017
hetspe1.1	Heterodermia	speciosa		{"clade": "OSLEUM clade", "kingdom": "Fungi", "phylum": "Ascomycota", "subphylum": "Pezizomycotina", "class": "Lecanoromycetes", "subclass": "Lecanoromycetidae", "order": "Caliciales", "family": "Physciaceae", "subfamily": ""}	2021-03-19	ncbi	hetspe1	GCA_905337345.1	None	2021/03/19
hexnit1	Hexagonia	nitida	CIRMBRFM1802	{"clade": "Opisthokonta", "kingdom": "Fungi", "phylum": "Basidiomycota", "subphylum": "Agaricomycotina", "class": "Agaricomycetes", "order": "Polyporales", "family": "Polyporaceae", "subfamily": ""}	v1.0	jgi		Hexnit1	20210414	Hage H et al.,2021
hirmin1	Hirsutella	minnesotensis	3608	{"clade": "sordariomyceta", "kingdom": "Fungi", "phylum": "Ascomycota", "subphylum": "Pezizomycotina", "class": "Sordariomycetes", "subclass": "Hypocreomycetidae", "order": "Hypocreales", "family": "Ophiocordycipitaceae", "subfamily": ""}	0	jgi	319581	Hirmi1	20210414	Lai Y et al.,2014
hirrho1.1	Hirsutella	rhossiliensis		{"clade": "sordariomyceta", "kingdom": "Fungi", "phylum": "Ascomycota", "subphylum": "Pezizomycotina", "class": "Sordariomycetes", "subclass": "Hypocreomycetidae", "order": "Hypocreales", "family": "Ophiocordycipitaceae", "subfamily": ""}	2021-10-07	ncbi	hirrho1	GCF_020360975.1	None	2021/10/07
hiscap1	Histoplasma	capsulatum	NAm1	{"clade": "leotiomyceta", "kingdom": "Fungi", "phylum": "Ascomycota", "subphylum": "Pezizomycotina", "class": "Eurotiomycetes", "subclass": "Eurotiomycetidae", "order": "Onygenales", "family": "Ajellomycetaceae", "subfamily": ""}	0	jgi		Hisca1	20210421	Sharpton TJ et al.,2009
hiscap3.1	Histoplasma	capsulatum	G186AR	{"clade": "leotiomyceta", "kingdom": "Fungi", "phylum": "Ascomycota", "subphylum": "Pezizomycotina", "class": "Eurotiomycetes", "subclass": "Eurotiomycetidae", "order": "Onygenales", "family": "Ajellomycetaceae", "subfamily": ""}	2021-03-15 00:00:00	ncbi	hiscap3	GCA_017355575.1	None	2021/03/09
hiscap4.1	Histoplasma	capsulatum	H88	{"clade": "leotiomyceta", "kingdom": "Fungi", "phylum": "Ascomycota", "subphylum": "Pezizomycotina", "class": "Eurotiomycetes", "subclass": "Eurotiomycetidae", "order": "Onygenales", "family": "Ajellomycetaceae", "subfamily": ""}	2021-03-09 00:00:00	ncbi	hiscap4	GCA_017310615.1	None	2021/03/09
hiscap5.1	Histoplasma	capsulatum	H143	{"clade": "leotiomyceta", "kingdom": "Fungi", "phylum": "Ascomycota", "subphylum": "Pezizomycotina", "class": "Eurotiomycetes", "subclass": "Eurotiomycetidae", "order": "Onygenales", "family": "Ajellomycetaceae", "subfamily": ""}	2014-08-06 00:00:00	ncbi	hiscap5	GCA_000151035.1	None	2009/06/01
hiscap6.1	Histoplasma	capsulatum	G186AR	{"clade": "leotiomyceta", "kingdom": "Fungi", "phylum": "Ascomycota", "subphylum": "Pezizomycotina", "class": "Eurotiomycetes", "subclass": "Eurotiomycetidae", "order": "Onygenales", "family": "Ajellomycetaceae", "subfamily": ""}	2014-08-06 00:00:00	ncbi	hiscap6	GCF_000150115.1	None	2007/08/31
hiscap7.1	Histoplasma	capsulatum	H88	{"clade": "leotiomyceta", "kingdom": "Fungi", "phylum": "Ascomycota", "subphylum": "Pezizomycotina", "class": "Eurotiomycetes", "subclass": "Eurotiomycetidae", "order": "Onygenales", "family": "Ajellomycetaceae", "subfamily": ""}	2014-08-06 00:00:00	ncbi	hiscap7	GCA_000151005.2	None	2008/09/05
hiscap9.1	Histoplasma	capsulatum	G217B	{"clade": "leotiomyceta", "kingdom": "Fungi", "phylum": "Ascomycota", "subphylum": "Pezizomycotina", "class": "Eurotiomycetes", "subclass": "Eurotiomycetidae", "order": "Onygenales", "family": "Ajellomycetaceae", "subfamily": ""}	2021-03-30	ncbi	hiscap9	GCA_017607445.1	None	2021/03/29
hompol1	Homolaphlyctis	polyrhiza	JEL142	{"clade": "Opisthokonta", "kingdom": "Fungi", "phylum": "Chytridiomycota", "class": "Chytridiomycetes", "order": "Rhizophydiales", "subphylum": "", "family": "", "subfamily": ""}	v1.0	jgi	317368	Hompol1	20210414	Joneson S et al.,2011
horaci1	Hortaea	acidophila	CBS113389	{"clade": "dothideomyceta", "kingdom": "Fungi", "phylum": "Ascomycota", "subphylum": "Pezizomycotina", "class": "Dothideomycetes", "subclass": "Dothideomycetidae", "order": "Mycosphaerellales", "family": "Teratosphaeriaceae", "subfamily": ""}	v1.0	jgi		Horac1	20210414	Haridas S et al.,2020
hortha1.1	Hortaea	thailandica		{"clade": "dothideomyceta", "kingdom": "Fungi", "phylum": "Ascomycota", "subphylum": "Pezizomycotina", "class": "Dothideomycetes", "subclass": "Dothideomycetidae", "order": "Mycosphaerellales", "family": "Teratosphaeriaceae", "subfamily": ""}	20190502	ncbi	SAMN06285184	GCA_005059885.1	None	2019/05/02
horwer1	Hortaea	werneckii	EXF2000M0	{"clade": "dothideomyceta", "kingdom": "Fungi", "phylum": "Ascomycota", "subphylum": "Pezizomycotina", "class": "Dothideomycetes", "subclass": "Dothideomycetidae", "order": "Mycosphaerellales", "family": "Teratosphaeriaceae", "subfamily": ""}	v1.0	jgi		Horwer1	20210421	Lenassi M et al.,2013
horwer2.1	Hortaea	werneckii	EXF2000	{"clade": "dothideomyceta", "kingdom": "Fungi", "phylum": "Ascomycota", "subphylum": "Pezizomycotina", "class": "Dothideomycetes", "subclass": "Dothideomycetidae", "order": "Mycosphaerellales", "family": "Teratosphaeriaceae", "subfamily": ""}	2017-05-11 00:00:00	ncbi	horwer2	GCA_002127715.1	None	2017/05/11
hyabic1.1	Hyaloscypha	bicolor	E	{"clade": "sordariomyceta", "kingdom": "Fungi", "phylum": "Ascomycota", "subphylum": "Pezizomycotina", "class": "Leotiomycetes", "order": "Helotiales", "family": "Hyaloscyphaceae", "subfamily": ""}	20180110	ncbi	SAMN02194342	GCF_002865645.1	None	2018/01/08
hydfim1	Hydnopolyporus	fimbriatus	CBS38451	{"clade": "Opisthokonta", "kingdom": "Fungi", "phylum": "Basidiomycota", "subphylum": "Agaricomycotina", "class": "Agaricomycetes", "order": "Polyporales", "family": "Irpicaceae", "subfamily": ""}	v1.0	jgi		Hydfim1	20210414	Hage H et al.,2021
hydruf1	Hydnum	rufescens	UP504	{"clade": "Opisthokonta", "kingdom": "Fungi", "phylum": "Basidiomycota", "subphylum": "Agaricomycotina", "class": "Agaricomycetes", "order": "Cantharellales", "family": "Hydnaceae", "subfamily": ""}	v2.0	jgi		Hydru2	20210414	Miyauchi S et al.,2020
hygaur1	Hygrophoropsis	aurantiaca	ATCC28755	{"clade": "Opisthokonta", "kingdom": "Fungi", "phylum": "Basidiomycota", "subphylum": "Agaricomycotina", "class": "Agaricomycetes", "subclass": "Agaricomycetidae", "order": "Boletales", "suborder": "Coniophorineae", "family": "Hygrophoropsidaceae", "subfamily": ""}	v1.0	jgi		Hygaur1	20210414	Wu G et al.,2022
hymalb1.1	Hymenoscyphus	albidus		{"clade": "sordariomyceta", "kingdom": "Fungi", "phylum": "Ascomycota", "subphylum": "Pezizomycotina", "class": "Leotiomycetes", "order": "Helotiales", "family": "Helotiaceae", "subfamily": ""}	2021-08-01	ncbi	hymalb1	GCA_911693285.1	None	2021/08/01
hymfra1.1	Hymenoscyphus	fraxineus		{"clade": "sordariomyceta", "kingdom": "Fungi", "phylum": "Ascomycota", "subphylum": "Pezizomycotina", "class": "Leotiomycetes", "order": "Helotiales", "family": "Helotiaceae", "subfamily": ""}	2021-08-01	ncbi	hymfra1	GCA_911649665.1	None	2021/08/01
hymrad1	Hymenopellis	radicata	IJFMA160	{"clade": "Opisthokonta", "kingdom": "Fungi", "phylum": "Basidiomycota", "subphylum": "Agaricomycotina", "class": "Agaricomycetes", "subclass": "Agaricomycetidae", "order": "Agaricales", "family": "Physalacriaceae", "subfamily": ""}	v1.0	jgi		Hymrad1	20210414	Ruiz-Dueñas FJ et al.,2021
hyparg1	Hypoxylon	argillaceum	CBS52763	{"clade": "sordariomyceta", "kingdom": "Fungi", "phylum": "Ascomycota", "subphylum": "Pezizomycotina", "class": "Sordariomycetes", "subclass": "Xylariomycetidae", "order": "Xylariales", "family": "Hypoxylaceae", "subfamily": ""}	v1.0	jgi		Hyparg1	20210414	Franco MEE et al.,2022
hypbur1	Hyphopichia	burtonii	NRRLY1933	{"clade": "saccharomyceta", "kingdom": "Fungi", "phylum": "Ascomycota", "subphylum": "Saccharomycotina", "class": "Saccharomycetes", "order": "Saccharomycetales", "family": "Debaryomycetaceae", "subfamily": ""}	v1.0	jgi	796351	Hypbu1	20210414	Riley R et al.,2016
hypcer1	Hypoxylon	cercidicola	CBS119009	{"clade": "sordariomyceta", "kingdom": "Fungi", "phylum": "Ascomycota", "subphylum": "Pezizomycotina", "class": "Sordariomycetes", "subclass": "Xylariomycetidae", "order": "Xylariales", "family": "Hypoxylaceae", "subfamily": ""}	v1.0	jgi		Hypcer1	20210414	Franco MEE et al.,2022
hypcro1	Hypoxylon	crocopeplum	CBS119004	{"clade": "sordariomyceta", "kingdom": "Fungi", "phylum": "Ascomycota", "subphylum": "Pezizomycotina", "class": "Sordariomycetes", "subclass": "Xylariomycetidae", "order": "Xylariales", "family": "Hypoxylaceae", "subfamily": ""}	v1.0	jgi		Hypcro1	20210414	Franco MEE et al.,2022
hypfra1	Hypoxylon	fragiforme	CBS20631	{"clade": "sordariomyceta", "kingdom": "Fungi", "phylum": "Ascomycota", "subphylum": "Pezizomycotina", "class": "Sordariomycetes", "subclass": "Xylariomycetidae", "order": "Xylariales", "family": "Hypoxylaceae", "subfamily": ""}	v2.0	jgi		Hypfra2	20210414	Franco MEE et al.,2022
hypfus1	Hypoxylon	fuscum	CBS119018	{"clade": "sordariomyceta", "kingdom": "Fungi", "phylum": "Ascomycota", "subphylum": "Pezizomycotina", "class": "Sordariomycetes", "subclass": "Xylariomycetidae", "order": "Xylariales", "family": "Hypoxylaceae", "subfamily": ""}	v1.0	jgi		Hypfus1	20210414	Franco MEE et al.,2022
hypmar1	Hypsizygus	marmoreus	519878	{"clade": "Opisthokonta", "kingdom": "Fungi", "phylum": "Basidiomycota", "subphylum": "Agaricomycotina", "class": "Agaricomycetes", "subclass": "Agaricomycetidae", "order": "Agaricales", "family": "Lyophyllaceae", "subfamily": ""}	0	jgi	713281	Hypma1	20210414	Min B et al.,2018
hypmon1	Hypoxylon	monticulosum	FL0542	{"clade": "sordariomyceta", "kingdom": "Fungi", "phylum": "Ascomycota", "subphylum": "Pezizomycotina", "class": "Sordariomycetes", "subclass": "Xylariomycetidae", "order": "Xylariales", "family": "Hypoxylaceae", "subfamily": ""}	v1.0	jgi		Hypmon1	20210414	Franco MEE et al.,2022
hyprub1	Hypoxylon	rubiginosum	CBS119005	{"clade": "sordariomyceta", "kingdom": "Fungi", "phylum": "Ascomycota", "subphylum": "Pezizomycotina", "class": "Sordariomycetes", "subclass": "Xylariomycetidae", "order": "Xylariales", "family": "Hypoxylaceae", "subfamily": ""}	v1.0	jgi		Hyprub1	20210414	Franco MEE et al.,2022
hyprub2	Hypoxylon	rubiginosum	ER1909	{"clade": "sordariomyceta", "kingdom": "Fungi", "phylum": "Ascomycota", "subphylum": "Pezizomycotina", "class": "Sordariomycetes", "subclass": "Xylariomycetidae", "order": "Xylariales", "family": "Hypoxylaceae", "subfamily": ""}	v1.0	jgi		HyprubER1909_1	20210414	Franco MEE et al.,2022
hypsp.1	Hypoxylon	sp.	FL1284	{"clade": "sordariomyceta", "kingdom": "Fungi", "phylum": "Ascomycota", "subphylum": "Pezizomycotina", "class": "Sordariomycetes", "subclass": "Xylariomycetidae", "order": "Xylariales", "family": "Hypoxylaceae", "subfamily": ""}	v2.0	jgi		HyFL1284_2	20210414	Franco MEE et al.,2022
hypsp.10	Hypoxylon	sp.	CO275	{"clade": "sordariomyceta", "kingdom": "Fungi", "phylum": "Ascomycota", "subphylum": "Pezizomycotina", "class": "Sordariomycetes", "subclass": "Xylariomycetidae", "order": "Xylariales", "family": "Hypoxylaceae", "subfamily": ""}	v1.0	jgi	1096221	HypCO275_1	20210414	Wu W et al.,2017
hypsp.2	Hypoxylon	sp.	NC1633	{"clade": "sordariomyceta", "kingdom": "Fungi", "phylum": "Ascomycota", "subphylum": "Pezizomycotina", "class": "Sordariomycetes", "subclass": "Xylariomycetidae", "order": "Xylariales", "family": "Hypoxylaceae", "subfamily": ""}	v2.0	jgi		HyNC1633_2	20210414	Franco MEE et al.,2022
hypsp.3	Hypoxylon	sp.	FL1150	{"clade": "sordariomyceta", "kingdom": "Fungi", "phylum": "Ascomycota", "subphylum": "Pezizomycotina", "class": "Sordariomycetes", "subclass": "Xylariomycetidae", "order": "Xylariales", "family": "Hypoxylaceae", "subfamily": ""}	v1.0	jgi		HyFL1150_1	20210414	Franco MEE et al.,2022
hypsp.4	Hypoxylon	sp.	FL1857	{"clade": "sordariomyceta", "kingdom": "Fungi", "phylum": "Ascomycota", "subphylum": "Pezizomycotina", "class": "Sordariomycetes", "subclass": "Xylariomycetidae", "order": "Xylariales", "family": "Hypoxylaceae", "subfamily": ""}	v1.0	jgi		HyFL1857_1	20210414	Franco MEE et al.,2022
hypsp.5	Hypoxylon	sp.	NC0597	{"clade": "sordariomyceta", "kingdom": "Fungi", "phylum": "Ascomycota", "subphylum": "Pezizomycotina", "class": "Sordariomycetes", "subclass": "Xylariomycetidae", "order": "Xylariales", "family": "Hypoxylaceae", "subfamily": ""}	v1.0	jgi		HyNC0597_1	20210414	Franco MEE et al.,2022
hypsp.6	Hypoxylon	sp.	FL0890	{"clade": "sordariomyceta", "kingdom": "Fungi", "phylum": "Ascomycota", "subphylum": "Pezizomycotina", "class": "Sordariomycetes", "subclass": "Xylariomycetidae", "order": "Xylariales", "family": "Hypoxylaceae", "subfamily": ""}	v1.0	jgi		HyFL0890_1	20210414	Franco MEE et al.,2022
hypsp.7	Hypoxylon	sp.	FL0543	{"clade": "sordariomyceta", "kingdom": "Fungi", "phylum": "Ascomycota", "subphylum": "Pezizomycotina", "class": "Sordariomycetes", "subclass": "Xylariomycetidae", "order": "Xylariales", "family": "Hypoxylaceae", "subfamily": ""}	v1.0	jgi		HyFL0543_1	20210414	Franco MEE et al.,2022
hypsp.8	Hypoxylon	sp.	EC38	{"clade": "sordariomyceta", "kingdom": "Fungi", "phylum": "Ascomycota", "subphylum": "Pezizomycotina", "class": "Sordariomycetes", "subclass": "Xylariomycetidae", "order": "Xylariales", "family": "Hypoxylaceae", "subfamily": ""}	v3.0	jgi	1096051	HypEC38_3	20210414	Wu W et al.,2017
hypsp.9	Hypoxylon	sp.	CI4A	{"clade": "sordariomyceta", "kingdom": "Fungi", "phylum": "Ascomycota", "subphylum": "Pezizomycotina", "class": "Sordariomycetes", "subclass": "Xylariomycetidae", "order": "Xylariales", "family": "Hypoxylaceae", "subfamily": ""}	v1.0	jgi	1096061	HypCI4A_1	20210414	Wu W et al.,2017
hypsub1	Hypoxylon	submonticulosum	NC0708	{"clade": "sordariomyceta", "kingdom": "Fungi", "phylum": "Ascomycota", "subphylum": "Pezizomycotina", "class": "Sordariomycetes", "subclass": "Xylariomycetidae", "order": "Xylariales", "family": "Hypoxylaceae", "subfamily": ""}	v2.0	jgi		Hypsub2	20210414	Franco MEE et al.,2022
hyptru1	Hypoxylon	trugodes	CBS135444	{"clade": "sordariomyceta", "kingdom": "Fungi", "phylum": "Ascomycota", "subphylum": "Pezizomycotina", "class": "Sordariomycetes", "subclass": "Xylariomycetidae", "order": "Xylariales", "family": "Hypoxylaceae", "subfamily": ""}	v1.0	jgi		Hyptru1	20210414	Franco MEE et al.,2022
hyspul1	Hysterium	pulicare		{"clade": "dothideomyceta", "kingdom": "Fungi", "phylum": "Ascomycota", "subphylum": "Pezizomycotina", "class": "Dothideomycetes", "subclass": "Pleosporomycetidae", "order": "Hysteriales", "family": "Hysteriaceae", "subfamily": ""}	0	jgi		Hyspu1_1	20210414	Ohm RA et al.,2012
hyssto1	Hysterangium	stoloniferum	HSBST	{"clade": "Opisthokonta", "kingdom": "Fungi", "phylum": "Basidiomycota", "subphylum": "Agaricomycotina", "class": "Agaricomycetes", "subclass": "Phallomycetidae", "order": "Hysterangiales", "family": "Hysterangiaceae", "subfamily": ""}	v1.0	jgi	8384491	Hyssto1	20210414	Miyauchi S et al.,2020
ilysp.1	Ilyonectria	sp.	MPICAGEAT0134	{"clade": "sordariomyceta", "kingdom": "Fungi", "phylum": "Ascomycota", "subphylum": "Pezizomycotina", "class": "Sordariomycetes", "subclass": "Hypocreomycetidae", "order": "Hypocreales", "family": "Nectriaceae", "subfamily": ""}	v1.0	jgi		Neora1	20210414	Mesny F et al.,2021
ilysp.2	Ilyonectria	sp.	MPICAGEAT0026	{"clade": "sordariomyceta", "kingdom": "Fungi", "phylum": "Ascomycota", "subphylum": "Pezizomycotina", "class": "Sordariomycetes", "subclass": "Hypocreomycetidae", "order": "Hypocreales", "family": "Nectriaceae", "subfamily": ""}	v1.0	jgi		Ilyeu1	20210414	Mesny F et al.,2021
ilysp.3	Ilyonectria	sp.		{"clade": "sordariomyceta", "kingdom": "Fungi", "phylum": "Ascomycota", "subphylum": "Pezizomycotina", "class": "Sordariomycetes", "subclass": "Hypocreomycetidae", "order": "Hypocreales", "family": "Nectriaceae", "subfamily": ""}	v1.0	jgi		Ilysp1	20210414	Liao HL et al.,2019
imsale1.1	Imshaugia	aleurites		{"clade": "OSLEUM clade", "kingdom": "Fungi", "phylum": "Ascomycota", "subphylum": "Pezizomycotina", "class": "Lecanoromycetes", "subclass": "Lecanoromycetidae", "order": "Lecanorales", "suborder": "Lecanorineae", "family": "Parmeliaceae", "subfamily": ""}	2021-03-19	ncbi	imsale1	GCA_905337355.1	None	2021/03/19
irplac1	Irpex	lacteus	CCBASFr23861793	{"clade": "Opisthokonta", "kingdom": "Fungi", "phylum": "Basidiomycota", "subphylum": "Agaricomycotina", "class": "Agaricomycetes", "order": "Polyporales", "family": "Irpicaceae", "subfamily": ""}	v1.0	jgi		Irplac1	20210414	Hage H et al.,2021
isafum1	Isaria	fumosorosea	ARSEF2679	{"clade": "sordariomyceta", "kingdom": "Fungi", "phylum": "Ascomycota", "subphylum": "Pezizomycotina", "class": "Sordariomycetes", "subclass": "Hypocreomycetidae", "order": "Hypocreales", "family": "Cordycipitaceae", "subfamily": ""}	0	jgi		Corfu1	20210414	Shang Y et al.,2016
isasin1	Isaria	sinclairii	ATCC24400	{"clade": "sordariomyceta", "kingdom": "Fungi", "phylum": "Ascomycota", "subphylum": "Pezizomycotina", "class": "Sordariomycetes", "subclass": "Hypocreomycetidae", "order": "Hypocreales", "family": "Ophiocordycipitaceae", "subfamily": "", "superkingdom": ""}	1	jgi		Isarsinc1	None	True
jamros1.1	Jaminaea	rosea		{"clade": "Opisthokonta", "kingdom": "Fungi", "phylum": "Basidiomycota", "subphylum": "Ustilaginomycotina", "class": "Exobasidiomycetes", "order": "Microstromatales", "family": "", "subfamily": ""}	20180523	ncbi	SAMN05446219	GCF_003144245.1	None	2018/05/21
jamsp.1	Jaminaea	sp.	MCA5214	{"clade": "Opisthokonta", "kingdom": "Fungi", "phylum": "Basidiomycota", "subphylum": "Ustilaginomycotina", "class": "Exobasidiomycetes", "order": "Microstromatales", "family": "", "subfamily": ""}	v1.0	jgi		Jamsp1	20210414	Kijpornyongpan T et al.,2018
jimfla1	Jimgerdemannia	flammicorona	AD002	{"clade": "Opisthokonta", "kingdom": "Fungi", "phylum": "Mucoromycota", "subphylum": "Mucoromycotina", "class": "Endogonomycetes", "order": "Endogonales", "family": "Endogonaceae", "subfamily": ""}	0	jgi		Jimfl_AD_1	20210414	Chang Y et al.,2019
jimfla2	Jimgerdemannia	flammicorona	GMNB39	{"clade": "Opisthokonta", "kingdom": "Fungi", "phylum": "Mucoromycota", "subphylum": "Mucoromycotina", "class": "Endogonomycetes", "order": "Endogonales", "family": "Endogonaceae", "subfamily": ""}	0	jgi		Jimfl_GMNB39_1	20210414	Chang Y et al.,2019
jimlac1	Jimgerdemannia	lactiflua	OSC166217	{"clade": "Opisthokonta", "kingdom": "Fungi", "phylum": "Mucoromycota", "subphylum": "Mucoromycotina", "class": "Endogonomycetes", "order": "Endogonales", "family": "Endogonaceae", "subfamily": ""}	0	jgi		Jimlac1	20210414	Chang Y et al.,2019
kalbra1	Kalmanozyma	brasiliensis	GHG001	{"clade": "Opisthokonta", "kingdom": "Fungi", "phylum": "Basidiomycota", "subphylum": "Ustilaginomycotina", "class": "Ustilaginomycetes", "order": "Ustilaginales", "family": "Ustilaginaceae", "subfamily": ""}	0	jgi	80541	Kalbr1	20210414	Oliveira JVC et al.,2014~Oliveira JV et al.,2013
kalpfe1	Kalaharituber	pfeilii	F3	{"clade": "saccharomyceta", "kingdom": "Fungi", "phylum": "Ascomycota", "subphylum": "Pezizomycotina", "class": "Pezizomycetes", "order": "Pezizales", "family": "Pezizaceae", "subfamily": ""}	v1.0	jgi		Kalpfe1	20210414	Miyauchi S et al.,2020
karrho1	Karstenula	rhodostoma	CBS69094	{"clade": "dothideomyceta", "kingdom": "Fungi", "phylum": "Ascomycota", "subphylum": "Pezizomycotina", "class": "Dothideomycetes", "subclass": "Pleosporomycetidae", "order": "Pleosporales", "suborder": "Massarineae", "family": "Didymosphaeriaceae", "subfamily": ""}	v1.0	jgi		Karrh1	20210414	Haridas S et al.,2020
kazafr1	Kazachstania	africana	CBS2517	{"clade": "saccharomyceta", "kingdom": "Fungi", "phylum": "Ascomycota", "subphylum": "Saccharomycotina", "class": "Saccharomycetes", "order": "Saccharomycetales", "family": "Saccharomycetaceae", "subfamily": ""}	0	jgi	450298	Kazaf1	20210414	Gordon JL et al.,2011
kazbar1.1	Kazachstania	barnettii		{"clade": "saccharomyceta", "kingdom": "Fungi", "phylum": "Ascomycota", "subphylum": "Saccharomycotina", "class": "Saccharomycetes", "order": "Saccharomycetales", "family": "Saccharomycetaceae", "subfamily": ""}	20210218	ncbi	SAMEA6153627	GCF_903064755.1	None	2021/02/18
kazbar2	Kazachstania	barnettii		{"clade": "saccharomyceta", "kingdom": "Fungi", "phylum": "Ascomycota", "subphylum": "Saccharomycotina", "class": "Saccharomycetes", "order": "Saccharomycetales", "family": "Saccharomycetaceae", "subfamily": ""}	20210218	ncbi	SAMEA6153626	GCA_903987035.1	20210414	2021/02/18
kazexi1.1	Kazachstania	exigua		{"clade": "saccharomyceta", "kingdom": "Fungi", "phylum": "Ascomycota", "subphylum": "Saccharomycotina", "class": "Saccharomycetes", "order": "Saccharomycetales", "family": "Saccharomycetaceae", "subfamily": ""}	20210108	ncbi	SAMN08581130	GCA_016584175.1	None	2021/01/08
kaznag1	Kazachstania	naganishii	CBS8797	{"clade": "saccharomyceta", "kingdom": "Fungi", "phylum": "Ascomycota", "subphylum": "Saccharomycotina", "class": "Saccharomycetes", "order": "Saccharomycetales", "family": "Saccharomycetaceae", "subfamily": ""}	0	jgi	561368	Kazna1	20210414	Gordon JL et al.,2011
kazsau1.1	Kazachstania	saulgeensis		{"clade": "saccharomyceta", "kingdom": "Fungi", "phylum": "Ascomycota", "subphylum": "Saccharomycotina", "class": "Saccharomycetes", "order": "Saccharomycetales", "family": "Saccharomycetaceae", "subfamily": ""}	20170428	ncbi	SAMEA104016679	GCA_900180425.1	None	2017/04/28
kazuni1.1	Kazachstania	unispora		{"clade": "saccharomyceta", "kingdom": "Fungi", "phylum": "Ascomycota", "subphylum": "Saccharomycotina", "class": "Saccharomycetes", "order": "Saccharomycetales", "family": "Saccharomycetaceae", "subfamily": ""}	20210108	ncbi	SAMN08581129	GCA_016584185.1	None	2021/01/08
kludob1.1	Kluyveromyces	dobzhanskii	CBS2104	{"clade": "saccharomyceta", "kingdom": "Fungi", "phylum": "Ascomycota", "subphylum": "Saccharomycotina", "class": "Saccharomycetes", "order": "Saccharomycetales", "family": "Saccharomycetaceae", "subfamily": ""}	2015-01-01	ncbi	kludob1	GCA_000820885.1	None	2015/01/01
klulac1	Kluyveromyces	lactis		{"clade": "saccharomyceta", "kingdom": "Fungi", "phylum": "Ascomycota", "subphylum": "Saccharomycotina", "class": "Saccharomycetes", "order": "Saccharomycetales", "family": "Saccharomycetaceae", "subfamily": ""}	0	jgi		Klula1	20210414	Dujon B et al.,2004
klumar2	Kluyveromyces	marxianus	DMKU31042	{"clade": "saccharomyceta", "kingdom": "Fungi", "phylum": "Ascomycota", "subphylum": "Saccharomycotina", "class": "Saccharomycetes", "order": "Saccharomycetales", "family": "Saccharomycetaceae", "subfamily": ""}	0	jgi	562221	Kluma1	20210414	Lertwattanasakul N et al.,2015
kocimp1	Kockovaella	imperatae	NRRLY17943	{"clade": "Opisthokonta", "kingdom": "Fungi", "phylum": "Basidiomycota", "subphylum": "Agaricomycotina", "class": "Tremellomycetes", "order": "Tremellales", "family": "Cuniculitremaceae", "subfamily": ""}	v1.0	jgi		Kocim1	20210414	Mondo SJ et al.,2017
kompas1.1	Komagataella	pastoris		{"clade": "saccharomyceta", "kingdom": "Fungi", "phylum": "Ascomycota", "subphylum": "Saccharomycotina", "class": "Saccharomycetes", "order": "Saccharomycetales", "family": "Phaffomycetaceae", "subfamily": ""}	20160810	ncbi	SAMN04305316	GCA_001708105.1	None	2016/08/10
kompha1.1	Komagataella	phaffii	GS115	{"clade": "saccharomyceta", "kingdom": "Fungi", "phylum": "Ascomycota", "subphylum": "Saccharomycotina", "class": "Saccharomycetes", "order": "Saccharomycetales", "family": "Phaffomycetaceae", "subfamily": ""}	20171011	ncbi	SAMEA2272385	GCF_000027005.1	None	2009/05/25
kompha2.1	Komagataella	phaffii	CBS7435	{"clade": "saccharomyceta", "kingdom": "Fungi", "phylum": "Ascomycota", "subphylum": "Saccharomycotina", "class": "Saccharomycetes", "order": "Saccharomycetales", "family": "Phaffomycetaceae", "subfamily": ""}	20171101	ncbi	SAMEA104362913	GCA_900235035.1	None	2017/11/01
kompha3	Komagataella	phaffii	CBS7435	{"clade": "saccharomyceta", "kingdom": "Fungi", "phylum": "Ascomycota", "subphylum": "Saccharomycotina", "class": "Saccharomycetes", "order": "Saccharomycetales", "family": "Phaffomycetaceae", "subfamily": ""}	20161005	ncbi	SAMEA2272267	GCA_000223565.1	20210414	2011/04/06
kompha4.1	Komagataella	phaffii		{"clade": "saccharomyceta", "kingdom": "Fungi", "phylum": "Ascomycota", "subphylum": "Saccharomycotina", "class": "Saccharomycetes", "order": "Saccharomycetales", "family": "Phaffomycetaceae", "subfamily": ""}	20160812	ncbi	SAMN04311987	GCA_001708085.1	None	2016/08/12
kompha5.1	Komagataella	phaffii	GS115	{"clade": "saccharomyceta", "kingdom": "Fungi", "phylum": "Ascomycota", "subphylum": "Saccharomycotina", "class": "Saccharomycetes", "order": "Saccharomycetales", "family": "Phaffomycetaceae", "subfamily": ""}	20160812	ncbi	SAMN04311980	GCA_001746955.1	None	2016/08/12
kredeu1	Kretzschmaria	deusta	CBS82672	{"clade": "sordariomyceta", "kingdom": "Fungi", "phylum": "Ascomycota", "subphylum": "Pezizomycotina", "class": "Sordariomycetes", "subclass": "Xylariomycetidae", "order": "Xylariales", "family": "Xylariaceae", "subfamily": ""}	v1.0	jgi		KdCBS826_1	20210414	Franco MEE et al.,2022
kredeu2	Kretzschmaria	deusta	IL1129	{"clade": "sordariomyceta", "kingdom": "Fungi", "phylum": "Ascomycota", "subphylum": "Pezizomycotina", "class": "Sordariomycetes", "subclass": "Xylariomycetidae", "order": "Xylariales", "family": "Xylariaceae", "subfamily": ""}	v1.0	jgi		Kredeu1	20210414	Franco MEE et al.,2022
kurcap1	Kuraishia	capsulata	CBS1993	{"clade": "saccharomyceta", "kingdom": "Fungi", "phylum": "Ascomycota", "subphylum": "Saccharomycotina", "class": "Saccharomycetes", "order": "Saccharomycetales", "family": "", "subfamily": ""}	2015-01-30	ncbi	kurcap1	GCF_000576695.1	20210709	2014/01/29
kwobes1.1	Kwoniella	bestiolae	CBS10118	{"clade": "Opisthokonta", "kingdom": "Fungi", "phylum": "Basidiomycota", "subphylum": "Agaricomycotina", "class": "Tremellomycetes", "order": "Tremellales", "family": "Cryptococcaceae", "subfamily": ""}	20160720	ncbi	SAMN01932836	GCF_000512585.1	None	2013/12/10
kwodej1.1	Kwoniella	dejecticola	CBS10117	{"clade": "Opisthokonta", "kingdom": "Fungi", "phylum": "Basidiomycota", "subphylum": "Agaricomycotina", "class": "Tremellomycetes", "order": "Tremellales", "family": "Cryptococcaceae", "subfamily": ""}	20160622	ncbi	SAMN01932837	GCF_000512565.1	None	2013/12/10
kwohev1.1	Kwoniella	heveanensis	BCC8398	{"clade": "Opisthokonta", "kingdom": "Fungi", "phylum": "Basidiomycota", "subphylum": "Agaricomycotina", "class": "Tremellomycetes", "order": "Tremellales", "family": "Cryptococcaceae", "subfamily": ""}	20160720	ncbi	SAMN01932850	GCA_000507405.3	None	2013/12/10
kwohev2.1	Kwoniella	heveanensis	CBS569	{"clade": "Opisthokonta", "kingdom": "Fungi", "phylum": "Basidiomycota", "subphylum": "Agaricomycotina", "class": "Tremellomycetes", "order": "Tremellales", "family": "Cryptococcaceae", "subfamily": ""}	20160720	ncbi	SAMN01932851	GCA_000507425.3	None	2013/12/10
kwoman1.1	Kwoniella	mangroviensis	CBS8507	{"clade": "Opisthokonta", "kingdom": "Fungi", "phylum": "Basidiomycota", "subphylum": "Agaricomycotina", "class": "Tremellomycetes", "order": "Tremellales", "family": "Cryptococcaceae", "subfamily": ""}	20160720	ncbi	SAMN01932738	GCF_000507465.1	None	2013/12/10
kwoman2.1	Kwoniella	mangroviensis	CBS8886	{"clade": "Opisthokonta", "kingdom": "Fungi", "phylum": "Basidiomycota", "subphylum": "Agaricomycotina", "class": "Tremellomycetes", "order": "Tremellales", "family": "Cryptococcaceae", "subfamily": ""}	20160720	ncbi	SAMN01932739	GCA_000507485.3	None	2013/12/10
kwoman3.1	Kwoniella	mangroviensis	CBS10435	{"clade": "Opisthokonta", "kingdom": "Fungi", "phylum": "Basidiomycota", "subphylum": "Agaricomycotina", "class": "Tremellomycetes", "order": "Tremellales", "family": "Cryptococcaceae", "subfamily": ""}	20160720	ncbi	SAMN02141314	GCA_000507885.2	None	2013/12/10
kwosha1.1	Kwoniella	shandongensis		{"clade": "Opisthokonta", "kingdom": "Fungi", "phylum": "Basidiomycota", "subphylum": "Agaricomycotina", "class": "Tremellomycetes", "order": "Tremellales", "family": "Cryptococcaceae", "subfamily": ""}	20190920	ncbi	SAMN07457167	GCF_008629635.1	None	2019/09/20
lacaka1	Lactarius	akahatsu	QP	{"clade": "Opisthokonta", "kingdom": "Fungi", "phylum": "Basidiomycota", "subphylum": "Agaricomycotina", "class": "Agaricomycetes", "order": "Russulales", "family": "Russulaceae", "subfamily": ""}	v1.0	jgi		Lacaka1	20210414	Lebreton A et al.,2022
lacame1	Laccaria	amethystina	LaAM081	{"clade": "Opisthokonta", "kingdom": "Fungi", "phylum": "Basidiomycota", "subphylum": "Agaricomycotina", "class": "Agaricomycetes", "subclass": "Agaricomycetidae", "order": "Agaricales", "family": "Tricholomataceae", "subfamily": ""}	v2.0	jgi		Lacam2	20210414	Kohler A et al.,2015
lacari1.1	Lachnellula	arida		{"clade": "sordariomyceta", "kingdom": "Fungi", "phylum": "Ascomycota", "subphylum": "Pezizomycotina", "class": "Leotiomycetes", "order": "Helotiales", "family": "Lachnaceae", "subfamily": ""}	20190801	ncbi	SAMN07703421	GCA_007821475.1	None	2019/08/01
lacbic15	Laccaria	bicolor		{"clade": "Opisthokonta", "kingdom": "Fungi", "phylum": "Basidiomycota", "subphylum": "Agaricomycotina", "class": "Agaricomycetes", "subclass": "Agaricomycetidae", "order": "Agaricales", "family": "Tricholomataceae", "subfamily": ""}	v2.0	jgi		Lacbi2	20210414	Martin F et al.,2008
laccer1.1	Lachnellula	cervina		{"clade": "sordariomyceta", "kingdom": "Fungi", "phylum": "Ascomycota", "subphylum": "Pezizomycotina", "class": "Leotiomycetes", "order": "Helotiales", "family": "Lachnaceae", "subfamily": ""}	20190801	ncbi	SAMN08668865	GCA_007825325.1	None	2019/08/01
laccf.1	Lactifluus	cf.	subvellereusBPL653	{"clade": "Opisthokonta", "kingdom": "Fungi", "phylum": "Basidiomycota", "subphylum": "Agaricomycotina", "class": "Agaricomycetes", "order": "Russulales", "family": "Russulaceae", "subfamily": ""}	v1.0	jgi		Lacsub1	20210414	Looney B et al.,2022
laccf.2	Lactifluus	cf.	volemusBPL652	{"clade": "Opisthokonta", "kingdom": "Fungi", "phylum": "Basidiomycota", "subphylum": "Agaricomycotina", "class": "Agaricomycetes", "order": "Russulales", "family": "Russulaceae", "subfamily": ""}	v1.0	jgi		Lacvol1	20210414	Looney B et al.,2022
lacdas1	Lachancea	dasiensis	CBS10888	{"clade": "saccharomyceta", "kingdom": "Fungi", "phylum": "Ascomycota", "subphylum": "Saccharomycotina", "class": "Saccharomycetes", "order": "Saccharomycetales", "family": "Saccharomycetaceae", "subfamily": ""}	0	jgi		Lacda1	20210414	Vakirlis N et al.,2016
lacdel1	Lactarius	deliciosus	48	{"clade": "Opisthokonta", "kingdom": "Fungi", "phylum": "Basidiomycota", "subphylum": "Agaricomycotina", "class": "Agaricomycetes", "order": "Russulales", "family": "Russulaceae", "subfamily": ""}	v1.0	jgi		Lacdel1	20210414	Lebreton A et al.,2022
lacfer1	Lachancea	fermentati	INRAUMR1319	{"clade": "saccharomyceta", "kingdom": "Fungi", "phylum": "Ascomycota", "subphylum": "Saccharomycotina", "class": "Saccharomycetes", "order": "Saccharomycetales", "family": "Saccharomycetaceae", "subfamily": ""}	0	jgi		Lacfe1	20210414	Vakirlis N et al.,2016
lachat1	Lactarius	hatsudake	109	{"clade": "Opisthokonta", "kingdom": "Fungi", "phylum": "Basidiomycota", "subphylum": "Agaricomycotina", "class": "Agaricomycetes", "order": "Russulales", "family": "Russulaceae", "subfamily": ""}	v1.0	jgi		Lachat1	20210414	Lebreton A et al.,2022
lachen1	Lactarius	hengduanensis	84	{"clade": "Opisthokonta", "kingdom": "Fungi", "phylum": "Basidiomycota", "subphylum": "Agaricomycotina", "class": "Agaricomycetes", "order": "Russulales", "family": "Russulaceae", "subfamily": ""}	v1.0	jgi		Lachen1	20210414	Lebreton A et al.,2022
lachya1.1	Lachnellula	hyalina		{"clade": "sordariomyceta", "kingdom": "Fungi", "phylum": "Ascomycota", "subphylum": "Pezizomycotina", "class": "Leotiomycetes", "order": "Helotiales", "family": "Lachnaceae", "subfamily": ""}	20190801	ncbi	SAMN08668878	GCF_007821495.1	None	2019/08/01
lacind1	Lactarius	indigo	2018DUKE089	{"clade": "Opisthokonta", "kingdom": "Fungi", "phylum": "Basidiomycota", "subphylum": "Agaricomycotina", "class": "Agaricomycetes", "order": "Russulales", "family": "Russulaceae", "subfamily": ""}	v1.0	jgi		Lacind1	20210414	Looney B et al.,2022
laclan1	Lachancea	lanzarotensis	CBS12615	{"clade": "saccharomyceta", "kingdom": "Fungi", "phylum": "Ascomycota", "subphylum": "Saccharomycotina", "class": "Saccharomycetes", "order": "Saccharomycetales", "family": "Saccharomycetaceae", "subfamily": ""}	0	jgi	303481	Lacla1	20210414	Sarilar V et al.,2015
lacmey1	Lachancea	meyersii	CBS8951	{"clade": "saccharomyceta", "kingdom": "Fungi", "phylum": "Ascomycota", "subphylum": "Saccharomycotina", "class": "Saccharomycetes", "order": "Saccharomycetales", "family": "Saccharomycetaceae", "subfamily": ""}	0	jgi		Lacme1	20210414	Vakirlis N et al.,2016
lacmir1	Lachancea	mirantina	INRAUMR1319	{"clade": "saccharomyceta", "kingdom": "Fungi", "phylum": "Ascomycota", "subphylum": "Saccharomycotina", "class": "Saccharomycetes", "order": "Saccharomycetales", "family": "Saccharomycetaceae", "subfamily": ""}	0	jgi		Lacmi1	20210414	Vakirlis N et al.,2016
lacnot1	Lachancea	nothofagi	CBS11611	{"clade": "saccharomyceta", "kingdom": "Fungi", "phylum": "Ascomycota", "subphylum": "Saccharomycotina", "class": "Saccharomycetes", "order": "Saccharomycetales", "family": "Saccharomycetaceae", "subfamily": ""}	0	jgi		Lacno1	20210414	Vakirlis N et al.,2016
lacocc1.1	Lachnellula	occidentalis		{"clade": "sordariomyceta", "kingdom": "Fungi", "phylum": "Ascomycota", "subphylum": "Pezizomycotina", "class": "Leotiomycetes", "order": "Helotiales", "family": "Lachnaceae", "subfamily": ""}	20190801	ncbi	SAMN08682890	GCA_007821535.1	None	2019/08/01
lacpsa1	Lactarius	psammicola	BPL869	{"clade": "Opisthokonta", "kingdom": "Fungi", "phylum": "Basidiomycota", "subphylum": "Agaricomycotina", "class": "Agaricomycetes", "order": "Russulales", "family": "Russulaceae", "subfamily": ""}	v1.0	jgi		Lacpsa1	20210414	Looney B et al.,2022
lacpse1	Lactarius	pseudohatsudake	88	{"clade": "Opisthokonta", "kingdom": "Fungi", "phylum": "Basidiomycota", "subphylum": "Agaricomycotina", "class": "Agaricomycetes", "order": "Russulales", "family": "Russulaceae", "subfamily": ""}	v1.0	jgi		Lacpse1	20210414	Lebreton A et al.,2022
lacque1	Lachancea	quebecensis	INRAUMR1319	{"clade": "saccharomyceta", "kingdom": "Fungi", "phylum": "Ascomycota", "subphylum": "Saccharomycotina", "class": "Saccharomycetes", "order": "Saccharomycetales", "family": "Saccharomycetaceae", "subfamily": ""}	0	jgi		Lacqu1	20210414	Freel KC et al.,2016
lacqui1	Lactarius	quietus	S23C	{"clade": "Opisthokonta", "kingdom": "Fungi", "phylum": "Basidiomycota", "subphylum": "Agaricomycotina", "class": "Agaricomycetes", "order": "Russulales", "family": "Russulaceae", "subfamily": ""}	v1.0	jgi		Lacqui1	20210414	Miyauchi S et al.,2020
lacsan1	Lactarius	sanguifluus	B21	{"clade": "Opisthokonta", "kingdom": "Fungi", "phylum": "Basidiomycota", "subphylum": "Agaricomycotina", "class": "Agaricomycetes", "order": "Russulales", "family": "Russulaceae", "subfamily": ""}	v1.0	jgi		Lacsan1	20210414	Lebreton A et al.,2022
lacsp.1	Lachancea	sp.	CBS6924	{"clade": "saccharomyceta", "kingdom": "Fungi", "phylum": "Ascomycota", "subphylum": "Saccharomycotina", "class": "Saccharomycetes", "order": "Saccharomycetales", "family": "Saccharomycetaceae", "subfamily": ""}	0	jgi		LacCBS6924_1	20210414	Vakirlis N et al.,2016
lacsue1.1	Lachnellula	suecica		{"clade": "sordariomyceta", "kingdom": "Fungi", "phylum": "Ascomycota", "subphylum": "Pezizomycotina", "class": "Leotiomycetes", "order": "Helotiales", "family": "Lachnaceae", "subfamily": ""}	20190801	ncbi	SAMN08873675	GCA_007825345.1	None	2019/08/01
lacthe1	Lachancea	thermotolerans	CBS6340	{"clade": "saccharomyceta", "kingdom": "Fungi", "phylum": "Ascomycota", "subphylum": "Saccharomycotina", "class": "Saccharomycetes", "order": "Saccharomycetales", "family": "Saccharomycetaceae", "subfamily": ""}	0	jgi	165138	Lacth1	20210414	Souciet JL et al.,2009
lacviv1	Lactarius	vividus	141	{"clade": "Opisthokonta", "kingdom": "Fungi", "phylum": "Basidiomycota", "subphylum": "Agaricomycotina", "class": "Agaricomycetes", "order": "Russulales", "family": "Russulaceae", "subfamily": ""}	v1.0	jgi		Lacviv1	20210414	Lebreton A et al.,2022
lacwil1.1	Lachnellula	willkommii		{"clade": "sordariomyceta", "kingdom": "Fungi", "phylum": "Ascomycota", "subphylum": "Pezizomycotina", "class": "Leotiomycetes", "order": "Helotiales", "family": "Lachnaceae", "subfamily": ""}	20190801	ncbi	SAMN07710619	GCA_007825375.1	None	2019/08/01
laesul1	Laetiporus	sulphureus	varsulphureus	{"clade": "Opisthokonta", "kingdom": "Fungi", "phylum": "Basidiomycota", "subphylum": "Agaricomycotina", "class": "Agaricomycetes", "order": "Polyporales", "family": "Laetiporaceae", "subfamily": ""}	v1.0	jgi		Laesu1	20210421	Nagy LG et al.,2016
laesul2.1	Laetiporus	sulphureus	9353	{"clade": "Opisthokonta", "kingdom": "Fungi", "phylum": "Basidiomycota", "subphylum": "Agaricomycotina", "class": "Agaricomycetes", "order": "Polyporales", "family": "Laetiporaceae", "subfamily": ""}	2016-04-27 00:00:00	ncbi	laesul2	GCF_001632365.1	None	2016/04/26
lanasi1.1	Lanmaoa	asiatica		{"clade": "Opisthokonta", "kingdom": "Fungi", "phylum": "Basidiomycota", "subphylum": "Agaricomycotina", "class": "Agaricomycetes", "subclass": "Agaricomycetidae", "order": "Boletales", "suborder": "Boletineae", "family": "Boletaceae", "subfamily": ""}	2021-10-06	ncbi	lanasi1	GCA_020310465.1	None	2021/10/06
laspus1.1	Lasallia	pustulata		{"clade": "OSLEUM clade", "kingdom": "Fungi", "phylum": "Ascomycota", "subphylum": "Pezizomycotina", "class": "Lecanoromycetes", "subclass": "Umbilicariomycetidae", "order": "Umbilicariales", "family": "Umbilicariaceae", "subfamily": ""}	20190923	ncbi	SAMN12598961	GCA_008636195.1	None	2019/09/23
laspus2	Lasallia	pustulata		{"clade": "OSLEUM clade", "kingdom": "Fungi", "phylum": "Ascomycota", "subphylum": "Pezizomycotina", "class": "Lecanoromycetes", "subclass": "Umbilicariomycetidae", "order": "Umbilicariales", "family": "Umbilicariaceae", "subfamily": ""}	20170414	ncbi	SAMEA3646771	GCA_900169345.1	20210414	2017/04/14
lasthe1	Lasiodiplodia	theobromae		{"clade": "dothideomyceta", "kingdom": "Fungi", "phylum": "Ascomycota", "subphylum": "Pezizomycotina", "class": "Dothideomycetes", "order": "Botryosphaeriales", "family": "Botryosphaeriaceae", "subfamily": ""}	20200504	ncbi	SAMN07172427	GCF_012971845.1	20210414	2020/05/04
lasthe2.1	Lasiodiplodia	theobromae		{"clade": "dothideomyceta", "kingdom": "Fungi", "phylum": "Ascomycota", "subphylum": "Pezizomycotina", "class": "Dothideomycetes", "order": "Botryosphaeriales", "family": "Botryosphaeriaceae", "subfamily": ""}	20201201	ncbi	SAMN05589936	GCA_002111425.1	None	2017/04/25
lasthe3	Lasiodiplodia	theobromae		{"clade": "dothideomyceta", "kingdom": "Fungi", "phylum": "Ascomycota", "subphylum": "Pezizomycotina", "class": "Dothideomycetes", "order": "Botryosphaeriales", "family": "Botryosphaeriaceae", "subfamily": ""}	20191009	ncbi	SAMN08892999	GCA_008931885.1	20210414	2019/10/09
leclec1	Lecanicillium	lecanii	RCEF1005	{"clade": "sordariomyceta", "kingdom": "Fungi", "phylum": "Ascomycota", "subphylum": "Pezizomycotina", "class": "Sordariomycetes", "subclass": "Hypocreomycetidae", "order": "Hypocreales", "family": "Cordycipitaceae", "subfamily": ""}	0	jgi		Corco1	20210414	Shang Y et al.,2016
leilac1	Leiotrametes	lactinea	CIRMBRFM1664	{"clade": "Opisthokonta", "kingdom": "Fungi", "phylum": "Basidiomycota", "subphylum": "Agaricomycotina", "class": "Agaricomycetes", "order": "Polyporales", "family": "Polyporaceae", "subfamily": ""}	v1.0	jgi		Tralac1	20210414	Hage H et al.,2021
leimen1	Leiotrametes	menziesii	CIRMBRFM1781	{"clade": "Opisthokonta", "kingdom": "Fungi", "phylum": "Basidiomycota", "subphylum": "Agaricomycotina", "class": "Agaricomycetes", "order": "Polyporales", "family": "Polyporaceae", "subfamily": ""}	v1.0	jgi		Tramen1	20210414	Hage H et al.,2021
leisp.1	Leiotrametes	sp	BRFM1775	{"clade": "Opisthokonta", "kingdom": "Fungi", "phylum": "Basidiomycota", "subphylum": "Agaricomycotina", "class": "Agaricomycetes", "order": "Polyporales", "family": "Polyporaceae", "subfamily": ""}	v1.0	jgi		Leisp1	20210414	Hage H et al.,2021
lenedo1	Lentinula	edodes	B17	{"clade": "Opisthokonta", "kingdom": "Fungi", "phylum": "Basidiomycota", "subphylum": "Agaricomycotina", "class": "Agaricomycetes", "subclass": "Agaricomycetidae", "order": "Agaricales", "family": "Omphalotaceae", "subfamily": ""}	v1.3	jgi	642271	LedB17_3	20210414	Park SG et al.,2017~Shim D et al.,2016
lenedo2	Lentinula	edodes	NBRC111202	{"clade": "Opisthokonta", "kingdom": "Fungi", "phylum": "Basidiomycota", "subphylum": "Agaricomycotina", "class": "Agaricomycetes", "subclass": "Agaricomycetidae", "order": "Agaricales", "family": "Omphalotaceae", "subfamily": ""}	0	jgi	1008041	Lened1	20210414	Sakamoto Y et al.,2017
lenedo7	Lentinula	edodes	W126	{"clade": "Opisthokonta", "kingdom": "Fungi", "phylum": "Basidiomycota", "subphylum": "Agaricomycotina", "class": "Agaricomycetes", "subclass": "Agaricomycetidae", "order": "Agaricales", "family": "Omphalotaceae", "subfamily": ""}	v1.0	jgi	778551	Lentinedodes1	20210414	Chen L et al.,2016
lenedo8	Lentinula	edodes	LeBin0899ss11	{"clade": "Opisthokonta", "kingdom": "Fungi", "phylum": "Basidiomycota", "subphylum": "Agaricomycotina", "class": "Agaricomycetes", "subclass": "Agaricomycetidae", "order": "Agaricales", "family": "Omphalotaceae", "subfamily": ""}	v1.0	jgi		Lenedo1	20210414	Zhang J et al.,2022
lennov1	Lentinula	novae-zelandiae	ICMP18003	{"clade": "Opisthokonta", "kingdom": "Fungi", "phylum": "Basidiomycota", "subphylum": "Agaricomycotina", "class": "Agaricomycetes", "subclass": "Agaricomycetidae", "order": "Agaricales", "family": "Omphalotaceae", "subfamily": ""}	v1.0	jgi		LnoICMP18003A_1	20210414	Smith CA et al.,2021
lentig1	Lentinus	tigrinus	ALCF2SS16	{"clade": "Opisthokonta", "kingdom": "Fungi", "phylum": "Basidiomycota", "subphylum": "Agaricomycotina", "class": "Agaricomycetes", "order": "Polyporales", "family": "Polyporaceae", "subfamily": ""}	v1.0	jgi		Lenti6_1	20210414	Wu B et al.,2018
lentig2	Lentinus	tigrinus	ALCF2SS17	{"clade": "Opisthokonta", "kingdom": "Fungi", "phylum": "Basidiomycota", "subphylum": "Agaricomycotina", "class": "Agaricomycetes", "order": "Polyporales", "family": "Polyporaceae", "subfamily": ""}	v1.0	jgi		Lenti7_1	20210414	Wu B et al.,2018
leosp.1	Leotiomycetes	sp.	MPISDFRAT0126	{"clade": "sordariomyceta", "kingdom": "Fungi", "phylum": "Ascomycota", "subphylum": "Pezizomycotina", "class": "Leotiomycetes", "order": "", "family": "", "subfamily": ""}	v1.0	jgi	11380071	Phimu1	20210414	Mesny F et al.,2021
lepmac1	Leptosphaeria	maculans		{"clade": "dothideomyceta", "kingdom": "Fungi", "phylum": "Ascomycota", "subphylum": "Pezizomycotina", "class": "Dothideomycetes", "subclass": "Pleosporomycetidae", "order": "Pleosporales", "suborder": "Pleosporineae", "family": "Leptosphaeriaceae", "subfamily": ""}	0	jgi		Lepmu1	20210414	Rouxel T et al.,2011
lepnud1	Lepista	nuda	CBS24769	{"clade": "Opisthokonta", "kingdom": "Fungi", "phylum": "Basidiomycota", "subphylum": "Agaricomycotina", "class": "Agaricomycetes", "subclass": "Agaricomycetidae", "order": "Agaricales", "family": "", "subfamily": ""}	v1.0	jgi		Lepnud1	20210414	Ruiz-Dueñas FJ et al.,2021
lepsp.1	Leptodontidium	sp.	MPISDFRAT0119	{"clade": "sordariomyceta", "kingdom": "Fungi", "phylum": "Ascomycota", "subphylum": "Pezizomycotina", "class": "Leotiomycetes", "order": "Helotiales", "family": "", "subfamily": ""}	v2.0	jgi		Lepor2	20210414	Mesny F et al.,2021
letcol1.1	Letharia	columbiana		{"clade": "OSLEUM clade", "kingdom": "Fungi", "phylum": "Ascomycota", "subphylum": "Pezizomycotina", "class": "Lecanoromycetes", "subclass": "Lecanoromycetidae", "order": "Lecanorales", "suborder": "Lecanorineae", "family": "Parmeliaceae", "subfamily": ""}	20200805	ncbi	SAMN14934069	GCF_014066305.1	None	2020/08/05
letlup1.1	Letharia	lupina		{"clade": "OSLEUM clade", "kingdom": "Fungi", "phylum": "Ascomycota", "subphylum": "Pezizomycotina", "class": "Lecanoromycetes", "subclass": "Lecanoromycetidae", "order": "Lecanorales", "suborder": "Lecanorineae", "family": "Parmeliaceae", "subfamily": ""}	20200806	ncbi	SAMN14933604	GCF_014066315.1	None	2020/08/05
leucre1	Leucosporidiella	creatinivora	UCDFST621032	{"clade": "Opisthokonta", "kingdom": "Fungi", "phylum": "Basidiomycota", "subphylum": "Pucciniomycotina", "class": "Microbotryomycetes", "order": "Leucosporidiales", "family": "Leucosporidiaceae", "subfamily": ""}	v1.0	jgi		Leucr1	20210414	Mondo SJ et al.,2017
leuleu1	Leucoagaricus	leucothites		{"clade": "Opisthokonta", "kingdom": "Fungi", "phylum": "Basidiomycota", "subphylum": "Agaricomycotina", "class": "Agaricomycetes", "subclass": "Agaricomycetidae", "order": "Agaricales", "family": "Agaricaceae", "subfamily": ""}	20200623	ncbi	SAMN10245915	GCA_013368445.1	20210414	2020/06/23
leumol1	Leucogyrophana	mollusca	KUC20120723A06	{"clade": "Opisthokonta", "kingdom": "Fungi", "phylum": "Basidiomycota", "subphylum": "Agaricomycotina", "class": "Agaricomycetes", "subclass": "Agaricomycetidae", "order": "Boletales", "family": "", "subfamily": ""}	v1.0	jgi		Leumo1	20210414	Wu G et al.,2022
leusp.1	Leucoagaricus	sp.	SymCcos	{"clade": "Opisthokonta", "kingdom": "Fungi", "phylum": "Basidiomycota", "subphylum": "Agaricomycotina", "class": "Agaricomycetes", "subclass": "Agaricomycetidae", "order": "Agaricales", "family": "Agaricaceae", "subfamily": ""}	20160225	ncbi	SAMN04045427	GCA_001563735.1	20210414	2016/02/18
liccor1	Lichtheimia	corymbifera	JMRCFSU9682	{"clade": "Opisthokonta", "kingdom": "Fungi", "phylum": "Mucoromycota", "subphylum": "Mucoromycotina", "class": "Mucoromycetes", "order": "Mucorales", "family": "Lichtheimiaceae", "subfamily": ""}	0	jgi		Liccor1	20210414	Schwartze VU et al.,2014
licram1	Lichtheimia	ramosa	JMRCFSU6197	{"clade": "Opisthokonta", "kingdom": "Fungi", "phylum": "Mucoromycota", "subphylum": "Mucoromycotina", "class": "Mucoromycetes", "order": "Mucorales", "family": "Lichtheimiaceae", "subfamily": ""}	0	jgi	306491	Licra1	20210414	Linde J et al.,2014
linelo2.1	Linnemannia	elongata	AG77	{"clade": "Opisthokonta", "kingdom": "Fungi", "phylum": "Mucoromycota", "subphylum": "Mortierellomycotina", "class": "Mortierellomycetes", "order": "Mortierellales", "family": "Mortierellaceae", "subfamily": ""}	2016-05-26 00:00:00	ncbi	linelo2	GCA_001651415.1	None	2016/05/24
linexi1.1	Linnemannia	exigua		{"clade": "Opisthokonta", "kingdom": "Fungi", "phylum": "Mucoromycota", "subphylum": "Mortierellomycotina", "class": "Mortierellomycetes", "order": "Mortierellales", "family": "Mortierellaceae", "subfamily": ""}	20210104	ncbi	SAMN05720535	GCA_016097895.1	None	2020/12/16
lingam1.1	Linnemannia	gamsii		{"clade": "Opisthokonta", "kingdom": "Fungi", "phylum": "Mucoromycota", "subphylum": "Mortierellomycotina", "class": "Mortierellomycetes", "order": "Mortierellales", "family": "Mortierellaceae", "subfamily": ""}	20210104	ncbi	SAMN05720529	GCA_016097855.1	None	2020/12/16
lingam2.1	Linnemannia	gamsii		{"clade": "Opisthokonta", "kingdom": "Fungi", "phylum": "Mucoromycota", "subphylum": "Mortierellomycotina", "class": "Mortierellomycetes", "order": "Mortierellales", "family": "Mortierellaceae", "subfamily": ""}	20210104	ncbi	SAMN05720530	GCA_016097865.1	None	2020/12/16
linhya1.1	Linnemannia	hyalina		{"clade": "Opisthokonta", "kingdom": "Fungi", "phylum": "Mucoromycota", "subphylum": "Mortierellomycotina", "class": "Mortierellomycetes", "order": "Mortierellales", "family": "Mortierellaceae", "subfamily": ""}	2021-08-18	ncbi	linhya1	GCA_019671135.1	None	2021/08/18
lining1	Lindgomyces	ingoldianus	ATCC200398	{"clade": "dothideomyceta", "kingdom": "Fungi", "phylum": "Ascomycota", "subphylum": "Pezizomycotina", "class": "Dothideomycetes", "subclass": "Pleosporomycetidae", "order": "Pleosporales", "family": "Lindgomycetaceae", "subfamily": ""}	v1.0	jgi		Linin1	20210414	Haridas S et al.,2020
linpen1	Linderina	pennispora	ATCC12442	{"clade": "Opisthokonta", "kingdom": "Fungi", "phylum": "Zoopagomycota", "subphylum": "Kickxellomycotina", "class": "Kickxellomycetes", "order": "Kickxellales", "family": "Kickxellaceae", "subfamily": ""}	v1.0	jgi		Linpe1	20210414	Mondo SJ et al.,2017
linrhi1	Lineolata	rhizophorae	ATCC16933	{"clade": "dothideomyceta", "kingdom": "Fungi", "phylum": "Ascomycota", "subphylum": "Pezizomycotina", "class": "Dothideomycetes", "order": "Lineolatales", "family": "Lineolataceae", "subfamily": ""}	v1.0	jgi		Linrh1	20210414	Haridas S et al.,2020
linsch1.1	Linnemannia	schmuckeri		{"clade": "Opisthokonta", "kingdom": "Fungi", "phylum": "Mucoromycota", "subphylum": "Mortierellomycotina", "class": "Mortierellomycetes", "order": "Mortierellales", "family": "Mortierellaceae", "subfamily": ""}	20210104	ncbi	SAMN05720483	GCA_015502505.1	None	2020/11/16
linzyc1.1	Linnemannia	zychae		{"clade": "Opisthokonta", "kingdom": "Fungi", "phylum": "Mucoromycota", "subphylum": "Mortierellomycotina", "class": "Mortierellomycetes", "order": "Mortierellales", "family": "Mortierellaceae", "subfamily": ""}	20210104	ncbi	SAMN10361244	GCA_015847235.1	None	2020/12/08
linzyc2.1	Linnemannia	zychae		{"clade": "Opisthokonta", "kingdom": "Fungi", "phylum": "Mucoromycota", "subphylum": "Mortierellomycotina", "class": "Mortierellomycetes", "order": "Mortierellales", "family": "Mortierellaceae", "subfamily": ""}	20210104	ncbi	SAMN11510820	GCA_015847195.1	None	2020/12/08
lipsta1	Lipomyces	starkeyi	NRRLY11557	{"clade": "saccharomyceta", "kingdom": "Fungi", "phylum": "Ascomycota", "subphylum": "Saccharomycotina", "class": "Saccharomycetes", "order": "Saccharomycetales", "family": "Lipomycetaceae", "subfamily": ""}	v1.0	jgi		Lipst1_1	20210414	Riley R et al.,2016
lizemp1	Lizonia	empirigonia	CBS54276	{"clade": "dothideomyceta", "kingdom": "Fungi", "phylum": "Ascomycota", "subphylum": "Pezizomycotina", "class": "Dothideomycetes", "family": "Pseudoperisporiaceae", "order": "", "subfamily": ""}	v1.0	jgi	5503151	Lizem1	20210414	Haridas S et al.,2020
lobtra1	Lobosporangium	transversale	NRRL3116	{"clade": "Opisthokonta", "kingdom": "Fungi", "phylum": "Mucoromycota", "subphylum": "Mortierellomycotina", "class": "Mortierellomycetes", "order": "Mortierellales", "family": "Mortierellaceae", "subfamily": ""}	v1.0	jgi		Lobtra1	20210414	Mondo SJ et al.,2017
lodelo1	Lodderomyces	elongisporus	NRRLYB4239	{"clade": "Candida/Lodderomyces clade", "kingdom": "Fungi", "phylum": "Ascomycota", "subphylum": "Saccharomycotina", "class": "Saccharomycetes", "order": "Saccharomycetales", "family": "Debaryomycetaceae", "subfamily": ""}	0	jgi	172758	Lodelo1	20210414	Butler G et al.,2009
lompro1	Lomentospora	prolificans	JHH5317	{"clade": "sordariomyceta", "kingdom": "Fungi", "phylum": "Ascomycota", "subphylum": "Pezizomycotina", "class": "Sordariomycetes", "subclass": "Hypocreomycetidae", "order": "Microascales", "family": "Microascaceae", "subfamily": ""}	0	jgi	1198941	Lompr1	20210414	Luo R et al.,2017
lopmyt1	Lophium	mytilinum	CBS26934	{"clade": "dothideomyceta", "kingdom": "Fungi", "phylum": "Ascomycota", "subphylum": "Pezizomycotina", "class": "Dothideomycetes", "subclass": "Pleosporomycetidae", "order": "Mytilinidiales", "family": "Mytilinidiaceae", "subfamily": ""}	v1.0	jgi		Lopmy1	20210414	Haridas S et al.,2020
lopnuc1	Lophiotrema	nucula	CBS62786	{"clade": "dothideomyceta", "kingdom": "Fungi", "phylum": "Ascomycota", "subphylum": "Pezizomycotina", "class": "Dothideomycetes", "subclass": "Pleosporomycetidae", "order": "Pleosporales", "family": "Lophiotremataceae", "subfamily": ""}	v1.0	jgi		Lopnu1	20210414	Haridas S et al.,2020
lyoatr1	Lyophyllum	atratum	CBS144462	{"clade": "Opisthokonta", "kingdom": "Fungi", "phylum": "Basidiomycota", "subphylum": "Agaricomycotina", "class": "Agaricomycetes", "subclass": "Agaricomycetidae", "order": "Agaricales", "family": "Lyophyllaceae", "subfamily": ""}	v1.0	jgi		Lyoat1	20210414	Steindorff AS et al.,2021
macano1	Macroventuria	anomochaeta	CBS52571	{"clade": "dothideomyceta", "kingdom": "Fungi", "phylum": "Ascomycota", "subphylum": "Pezizomycotina", "class": "Dothideomycetes", "subclass": "Pleosporomycetidae", "order": "Pleosporales", "suborder": "Pleosporineae", "family": "Didymellaceae", "subfamily": ""}	v1.0	jgi		Macan1	20210414	Haridas S et al.,2020
macful1	Macrolepiota	fuliginosa	MFIS2	{"clade": "Opisthokonta", "kingdom": "Fungi", "phylum": "Basidiomycota", "subphylum": "Agaricomycotina", "class": "Agaricomycetes", "subclass": "Agaricomycetidae", "order": "Agaricales", "family": "Agaricaceae", "subfamily": ""}	v1.0	jgi		Macfu1	20210414	Ruiz-Dueñas FJ et al.,2021
macpha1	Macrophomina	phaseolina	MPISDFRAT0080	{"clade": "dothideomyceta", "kingdom": "Fungi", "phylum": "Ascomycota", "subphylum": "Pezizomycotina", "class": "Dothideomycetes", "order": "Botryosphaeriales", "family": "Botryosphaeriaceae", "subfamily": ""}	v1.0	jgi		Macpha1	20210414	Mesny F et al.,2021
macpha2	Macrophomina	phaseolina	MS6	{"clade": "dothideomyceta", "kingdom": "Fungi", "phylum": "Ascomycota", "subphylum": "Pezizomycotina", "class": "Dothideomycetes", "order": "Botryosphaeriales", "family": "Botryosphaeriaceae", "subfamily": ""}	0	jgi	438508	Macph1	20210414	Islam MS et al.,2012
madmyc1	Madurella	mycetomatis	mm55	{"clade": "sordariomyceta", "kingdom": "Fungi", "phylum": "Ascomycota", "subphylum": "Pezizomycotina", "class": "Sordariomycetes", "subclass": "Sordariomycetidae", "order": "Sordariales", "family": "", "subfamily": ""}	0	jgi	SAMN03252690	Madmy1	20210414	Smit S et al.,2016
magory1	Magnaporthe	oryzae	7015	{"clade": "sordariomyceta", "kingdom": "Fungi", "phylum": "Ascomycota", "subphylum": "Pezizomycotina", "class": "Sordariomycetes", "subclass": "Sordariomycetidae", "order": "Magnaporthales", "family": "Magnaporthaceae", "subfamily": ""}	v3.0	jgi		Magor1	20210414	Dean RA et al.,2005
magpoa1	Magnaporthiopsis	poae	ATCC64411	{"clade": "sordariomyceta", "kingdom": "Fungi", "phylum": "Ascomycota", "subphylum": "Pezizomycotina", "class": "Sordariomycetes", "subclass": "Sordariomycetidae", "order": "Magnaporthales", "family": "Magnaporthaceae", "subfamily": ""}	0	jgi	251988	Magpo1	20210414	Okagaki LH et al.,2015
malglo1.1	Malassezia	globosa	CBS7966	{"clade": "Opisthokonta", "kingdom": "Fungi", "phylum": "Basidiomycota", "subphylum": "Ustilaginomycotina", "class": "Malasseziomycetes", "order": "Malasseziales", "family": "Malasseziaceae", "subfamily": ""}	20140806	ncbi	SAMN02953680	GCF_000181695.1	None	2007/11/02
malpac1	Malassezia	pachydermatis	CBS1879	{"clade": "Opisthokonta", "kingdom": "Fungi", "phylum": "Basidiomycota", "subphylum": "Ustilaginomycotina", "class": "Malasseziomycetes", "order": "Malasseziales", "family": "Malasseziaceae", "subfamily": ""}	0	jgi		Malpa1	20210414	Triana S et al.,2015
malres1.1	Malassezia	restricta		{"clade": "Opisthokonta", "kingdom": "Fungi", "phylum": "Basidiomycota", "subphylum": "Ustilaginomycotina", "class": "Malasseziomycetes", "order": "Malasseziales", "family": "Malasseziaceae", "subfamily": ""}	20190111	ncbi	SAMN09478194	GCF_003290485.1	None	2018/07/09
malres2.1	Malassezia	restricta	CBS7877	{"clade": "Opisthokonta", "kingdom": "Fungi", "phylum": "Basidiomycota", "subphylum": "Ustilaginomycotina", "class": "Malasseziomycetes", "order": "Malasseziales", "family": "Malasseziaceae", "subfamily": ""}	20181029	ncbi	SAMN09377640	GCA_003691605.1	None	2018/10/29
malsym1	Malassezia	sympodialis	ATCC42132	{"clade": "Opisthokonta", "kingdom": "Fungi", "phylum": "Basidiomycota", "subphylum": "Ustilaginomycotina", "class": "Malasseziomycetes", "order": "Malasseziales", "family": "Malasseziaceae", "subfamily": ""}	0	jgi		Malsy1_1	20210414	Gioti A et al.,2013
malves1	Malassezia	vespertilionis	NWHC44797103	{"clade": "Opisthokonta", "kingdom": "Fungi", "phylum": "Basidiomycota", "subphylum": "Ustilaginomycotina", "class": "Malasseziomycetes", "order": "Malasseziales", "family": "Malasseziaceae", "subfamily": ""}	0	jgi	1489041	Malve1	20210414	Lorch JM et al.,2018
marbru1	Marssonina	brunnea	fspmultigermtubiMBm1	{"clade": "sordariomyceta", "kingdom": "Fungi", "phylum": "Ascomycota", "subphylum": "Pezizomycotina", "class": "Leotiomycetes", "order": "Helotiales", "family": "Dermateaceae", "subfamily": ""}	0	jgi	427188	Marbr1	20210414	Zhu S et al.,2012
marcor1	Marssonina	coronariae		{"clade": "sordariomyceta", "kingdom": "Fungi", "phylum": "Ascomycota", "subphylum": "Pezizomycotina", "class": "Leotiomycetes", "order": "Helotiales", "family": "Dermateaceae", "subfamily": ""}	20170621	ncbi	SAMN06564146	GCA_002204255.1	20210414	2017/06/21
marfia1	Marasmius	fiardii	PR910	{"clade": "Opisthokonta", "kingdom": "Fungi", "phylum": "Basidiomycota", "subphylum": "Agaricomycotina", "class": "Agaricomycetes", "subclass": "Agaricomycetidae", "order": "Agaricales", "family": "Marasmiaceae", "subfamily": ""}	v1.0	jgi		Marfi1	20210414	Miyauchi S et al.,2020
marore1.1	Marasmius	oreades		{"clade": "Opisthokonta", "kingdom": "Fungi", "phylum": "Basidiomycota", "subphylum": "Agaricomycotina", "class": "Agaricomycetes", "subclass": "Agaricomycetidae", "order": "Agaricales", "family": "Marasmiaceae", "subfamily": ""}	2021-06-17	ncbi	marore1	GCF_018924745.1	None	2021/06/16
masebu1	Massarina	eburnea	CBS47364	{"clade": "dothideomyceta", "kingdom": "Fungi", "phylum": "Ascomycota", "subphylum": "Pezizomycotina", "class": "Dothideomycetes", "subclass": "Pleosporomycetidae", "order": "Pleosporales", "suborder": "Massarineae", "family": "Massarinaceae", "subfamily": ""}	v1.0	jgi		Maseb1	20210414	Haridas S et al.,2020
maspha1	Massariosphaeria	phaeospora	CBS61186	{"clade": "dothideomyceta", "kingdom": "Fungi", "phylum": "Ascomycota", "subphylum": "Pezizomycotina", "class": "Dothideomycetes", "subclass": "Pleosporomycetidae", "order": "Pleosporales", "family": "", "subfamily": ""}	v1.0	jgi		Masph1	20210414	Haridas S et al.,2020
meimil1	Meira	miltonrushii	MCA3882	{"clade": "Opisthokonta", "kingdom": "Fungi", "phylum": "Basidiomycota", "subphylum": "Ustilaginomycotina", "class": "Exobasidiomycetes", "order": "Exobasidiales", "family": "Brachybasidiaceae", "subfamily": ""}	v1.0	jgi		Meimi1	20210414	Kijpornyongpan T et al.,2018
melame1	Melampsora	americana	R1503303	{"clade": "Opisthokonta", "kingdom": "Fungi", "phylum": "Basidiomycota", "subphylum": "Pucciniomycotina", "class": "Pucciniomycetes", "order": "Pucciniales", "family": "Melampsoraceae", "subfamily": ""}	v1.0	jgi		Melame1	20210414	Crowell CR et al.,2022
melbic1	Meliniomyces	bicolor	E	{"clade": "sordariomyceta", "kingdom": "Fungi", "phylum": "Ascomycota", "subphylum": "Pezizomycotina", "class": "Leotiomycetes", "order": "Helotiales", "family": "Hyaloscyphaceae", "subfamily": ""}	v2.0	jgi		Melbi2	20210414	Martino E et al.,2018
melbro1	Melanogaster	broomeianus	MBLBBST	{"clade": "Opisthokonta", "kingdom": "Fungi", "phylum": "Basidiomycota", "subphylum": "Agaricomycotina", "class": "Agaricomycetes", "subclass": "Agaricomycetidae", "order": "Boletales", "family": "Melanogastraceae", "subfamily": ""}	v1.0	jgi		Melbro1	20210414	Miyauchi S et al.,2020
mellar1	Melampsora	larici-populina	98AG31	{"clade": "Opisthokonta", "kingdom": "Fungi", "phylum": "Basidiomycota", "subphylum": "Pucciniomycotina", "class": "Pucciniomycetes", "order": "Pucciniales", "family": "Melampsoraceae", "subfamily": ""}	2014-08-01 00:00:00	ncbi	mellar1	GCF_000204055.1	20210421	2011/04/12
mellin1	Melampsora	lini	CH5	{"clade": "Opisthokonta", "kingdom": "Fungi", "phylum": "Basidiomycota", "subphylum": "Pucciniomycotina", "class": "Pucciniomycetes", "order": "Pucciniales", "family": "Melampsoraceae", "subfamily": ""}	0	jgi		Melli1	20210414	Nemri A et al.,2014
melvar1	Meliniomyces	variabilis	F	{"clade": "sordariomyceta", "kingdom": "Fungi", "phylum": "Ascomycota", "subphylum": "Pezizomycotina", "class": "Leotiomycetes", "order": "Helotiales", "family": "Hyaloscyphaceae", "subfamily": ""}	v1.0	jgi		Melva1	20210414	Martino E et al.,2018
metacr1	Metarhizium	acridum	CQMa102	{"clade": "sordariomyceta", "kingdom": "Fungi", "phylum": "Ascomycota", "subphylum": "Pezizomycotina", "class": "Sordariomycetes", "subclass": "Hypocreomycetidae", "order": "Hypocreales", "family": "Clavicipitaceae", "subfamily": ""}	0	jgi		Metac1	20210414	Gao Q et al.,2011
metaff1.1	Metschnikowia	aff.	pulcherrima	{"clade": "CUG-Ser1 clade", "kingdom": "Fungi", "phylum": "Ascomycota", "subphylum": "Saccharomycotina", "class": "Saccharomycetes", "order": "Saccharomycetales", "family": "Metschnikowiaceae", "subfamily": ""}	20190523	ncbi	SAMN10525143	GCA_004217705.1	None	2019/02/20
metalb1	Metarhizium	album	ARSEF1941	{"clade": "sordariomyceta", "kingdom": "Fungi", "phylum": "Ascomycota", "subphylum": "Pezizomycotina", "class": "Sordariomycetes", "subclass": "Hypocreomycetidae", "order": "Hypocreales", "family": "Clavicipitaceae", "subfamily": ""}	0	jgi	235841	Metal1	20210414	Hu X et al.,2014
metani1	Metarhizium	anisopliae	ARSEF549	{"clade": "sordariomyceta", "kingdom": "Fungi", "phylum": "Ascomycota", "subphylum": "Pezizomycotina", "class": "Sordariomycetes", "subclass": "Hypocreomycetidae", "order": "Hypocreales", "family": "Clavicipitaceae", "subfamily": ""}	0	jgi	241151	Metani1	20210421	Hu X et al.,2014
metani2	Metarhizium	anisopliae	BRIP53293	{"clade": "sordariomyceta", "kingdom": "Fungi", "phylum": "Ascomycota", "subphylum": "Pezizomycotina", "class": "Sordariomycetes", "subclass": "Hypocreomycetidae", "order": "Hypocreales", "family": "Clavicipitaceae", "subfamily": ""}	2015-03-18 00:00:00	ncbi	metani2	GCA_000426965.1	20210421	2013/07/12
metani3	Metarhizium	anisopliae	BRIP53284	{"clade": "sordariomyceta", "kingdom": "Fungi", "phylum": "Ascomycota", "subphylum": "Pezizomycotina", "class": "Sordariomycetes", "subclass": "Hypocreomycetidae", "order": "Hypocreales", "family": "Clavicipitaceae", "subfamily": ""}	2015-03-18 00:00:00	ncbi	metani3	GCA_000426985.1	20210421	2013/07/12
metbic2	Metschnikowia	bicuspidata	NRRLYB4993	{"clade": "CUG-Ser1 clade", "kingdom": "Fungi", "phylum": "Ascomycota", "subphylum": "Saccharomycotina", "class": "Saccharomycetes", "order": "Saccharomycetales", "family": "Metschnikowiaceae", "subfamily": ""}	v1.0	jgi		Metbi1	20210414	Riley R et al.,2016
metbic3	Metschnikowia	bicuspidata	singlecell	{"clade": "CUG-Ser1 clade", "kingdom": "Fungi", "phylum": "Ascomycota", "subphylum": "Saccharomycotina", "class": "Saccharomycetes", "order": "Saccharomycetales", "family": "Metschnikowiaceae", "subfamily": ""}	v1.0	jgi		Metbi_SCcomb	20210421	Ahrendt SR et al.,2018
metbic4.1	Metschnikowia	bicuspidata	varbicuspidataNRRLYB4993	{"clade": "CUG-Ser1 clade", "kingdom": "Fungi", "phylum": "Ascomycota", "subphylum": "Saccharomycotina", "class": "Saccharomycetes", "order": "Saccharomycetales", "family": "Metschnikowiaceae", "subfamily": ""}	2016-09-07 00:00:00	ncbi	metbic4	GCF_001664035.1	None	2016/06/17
metbru1	Metarhizium	brunneum	ARSEF3297	{"clade": "sordariomyceta", "kingdom": "Fungi", "phylum": "Ascomycota", "subphylum": "Pezizomycotina", "class": "Sordariomycetes", "subclass": "Hypocreomycetidae", "order": "Hypocreales", "family": "Clavicipitaceae", "subfamily": ""}	0	jgi	241161	Metbr1	20210414	Hu X et al.,2014
metfru1	Metschnikowia	fructicola	277	{"clade": "CUG-Ser1 clade", "kingdom": "Fungi", "phylum": "Ascomycota", "subphylum": "Saccharomycotina", "class": "Saccharomycetes", "order": "Saccharomycetales", "family": "Metschnikowiaceae", "subfamily": ""}	0	jgi	SAMN01797239	Metfru2	20210414	Hershkovitz V et al.,2013
metgui1	Metarhizium	guizhouense	ARSEF977	{"clade": "sordariomyceta", "kingdom": "Fungi", "phylum": "Ascomycota", "subphylum": "Pezizomycotina", "class": "Sordariomycetes", "subclass": "Hypocreomycetidae", "order": "Hypocreales", "family": "Clavicipitaceae", "subfamily": ""}	0	jgi	241141	Metgui1	20210414	Hu X et al.,2014
methum1	Metarhizium	humberi		{"clade": "sordariomyceta", "kingdom": "Fungi", "phylum": "Ascomycota", "subphylum": "Pezizomycotina", "class": "Sordariomycetes", "subclass": "Hypocreomycetidae", "order": "Hypocreales", "family": "Clavicipitaceae", "subfamily": ""}	2021-09-23	ncbi	methum1	GCA_020102295.1	20211019	2021/09/23
metmaj1	Metarhizium	majus	ARSEF297	{"clade": "sordariomyceta", "kingdom": "Fungi", "phylum": "Ascomycota", "subphylum": "Pezizomycotina", "class": "Sordariomycetes", "subclass": "Hypocreomycetidae", "order": "Hypocreales", "family": "Clavicipitaceae", "subfamily": ""}	0	jgi	241171	Metma1	20210414	Hu X et al.,2014
metper1	Metschnikowia	persimmonesis		{"clade": "CUG-Ser1 clade", "kingdom": "Fungi", "phylum": "Ascomycota", "subphylum": "Saccharomycotina", "class": "Saccharomycetes", "order": "Saccharomycetales", "family": "Metschnikowiaceae", "subfamily": ""}	20201021	ncbi	SAMN14558164	GCA_014905795.1	20210414	2020/10/21
metril1	Metarhizium	rileyi	RCEF4871	{"clade": "sordariomyceta", "kingdom": "Fungi", "phylum": "Ascomycota", "subphylum": "Pezizomycotina", "class": "Sordariomycetes", "subclass": "Hypocreomycetidae", "order": "Hypocreales", "family": "Clavicipitaceae", "subfamily": ""}	0	jgi	733971	Metri1	20210414	Shang Y et al.,2016
metrob2.1	Metarhizium	robertsii		{"clade": "sordariomyceta", "kingdom": "Fungi", "phylum": "Ascomycota", "subphylum": "Pezizomycotina", "class": "Sordariomycetes", "subclass": "Hypocreomycetidae", "order": "Hypocreales", "family": "Clavicipitaceae", "subfamily": ""}	20140522	ncbi	SAMN02798139	GCA_000591435.1	None	2014/03/17
metrob3.1	Metarhizium	robertsii	ARSEF23	{"clade": "sordariomyceta", "kingdom": "Fungi", "phylum": "Ascomycota", "subphylum": "Pezizomycotina", "class": "Sordariomycetes", "subclass": "Hypocreomycetidae", "order": "Hypocreales", "family": "Clavicipitaceae", "subfamily": ""}	2014-12-19	ncbi	metrob3	GCF_000187425.1	None	2011/01/31
metrob4	Metarhizium	robertsii	ARSEF23	{"clade": "sordariomyceta", "kingdom": "Fungi", "phylum": "Ascomycota", "subphylum": "Pezizomycotina", "class": "Sordariomycetes", "subclass": "Hypocreomycetidae", "order": "Hypocreales", "family": "Clavicipitaceae", "subfamily": ""}	0	jgi		Metro1	None	Hu X et al.,2014~Gao Q et al.,2011
metsp.2	Metschnikowia	sp.	JCM33374	{"clade": "CUG-Ser1 clade", "kingdom": "Fungi", "phylum": "Ascomycota", "subphylum": "Saccharomycotina", "class": "Saccharomycetes", "order": "Saccharomycetales", "family": "Metschnikowiaceae", "subfamily": ""}	2019-08-22 00:00:00	ncbi	metsp.2	GCA_005406065.1	20210421	2019/04/17
meygui1	Meyerozyma	guilliermondii	ATCC6260	{"clade": "saccharomyceta", "kingdom": "Fungi", "phylum": "Ascomycota", "subphylum": "Saccharomycotina", "class": "Saccharomycetes", "order": "Saccharomycetales", "family": "Debaryomycetaceae", "subfamily": ""}	0	jgi	172458	Meygui1	20210414	Butler G et al.,2009
meysp.1	Meyerozyma	sp.	JA9	{"clade": "saccharomyceta", "kingdom": "Fungi", "phylum": "Ascomycota", "subphylum": "Saccharomycotina", "class": "Saccharomycetes", "order": "Saccharomycetales", "family": "Debaryomycetaceae", "subfamily": ""}	20181023	ncbi	SAMN06883267	GCA_003676015.1	20210414	2018/10/23
micbol1	Microdochium	bolleyi	J235TASD1	{"clade": "sordariomyceta", "kingdom": "Fungi", "phylum": "Ascomycota", "subphylum": "Pezizomycotina", "class": "Sordariomycetes", "subclass": "Xylariomycetidae", "order": "Xylariales", "family": "Microdochiaceae", "subfamily": ""}	v1.0	jgi		Micbo1	20210414	David AS et al.,2016
miccan1	Microsporum	canis	CBS113480	{"clade": "leotiomyceta", "kingdom": "Fungi", "phylum": "Ascomycota", "subphylum": "Pezizomycotina", "class": "Eurotiomycetes", "subclass": "Eurotiomycetidae", "order": "Onygenales", "family": "Arthrodermataceae", "subfamily": ""}	0	jgi	174458	Micca1	20210414	Martinez DA et al.,2012
micint1	Microbotryum	intermedium	1389BM1212	{"clade": "Opisthokonta", "kingdom": "Fungi", "phylum": "Basidiomycota", "subphylum": "Pucciniomycotina", "class": "Microbotryomycetes", "order": "Microbotryales", "family": "Microbotryaceae", "subfamily": ""}	0	jgi		Micin1	20210414	Branco S et al.,2017
miclyc1	Microbotryum	lychnidis-dioicae	p1A1Lamole	{"clade": "Opisthokonta", "kingdom": "Fungi", "phylum": "Basidiomycota", "subphylum": "Pucciniomycotina", "class": "Microbotryomycetes", "order": "Microbotryales", "family": "Microbotryaceae", "subfamily": ""}	0	jgi	SAMEA3166469	Micld1	20210414	Perlin MH et al.,2015
micmic1	Microthyrium	microscopicum	CBS115976	{"clade": "dothideomyceta", "kingdom": "Fungi", "phylum": "Ascomycota", "subphylum": "Pezizomycotina", "class": "Dothideomycetes", "order": "Microthyriales", "family": "Microthyriaceae", "subfamily": ""}	v1.0	jgi		Micmi1	20210414	Haridas S et al.,2020
micsap1	Microbotryum	saponariae		{"clade": "Opisthokonta", "kingdom": "Fungi", "phylum": "Basidiomycota", "subphylum": "Pucciniomycotina", "class": "Microbotryomycetes", "order": "Microbotryales", "family": "Microbotryaceae", "subfamily": ""}	20180618	ncbi	SAMEA4505384	GCA_900102585.1	20210414	2018/06/18
micsap2	Microbotryum	saponariae		{"clade": "Opisthokonta", "kingdom": "Fungi", "phylum": "Basidiomycota", "subphylum": "Pucciniomycotina", "class": "Microbotryomycetes", "order": "Microbotryales", "family": "Microbotryaceae", "subfamily": ""}	20180618	ncbi	SAMEA4505383	GCA_900100905.1	20210414	2018/06/18
micsil1	Microbotryum	silenes-dioicae		{"clade": "Opisthokonta", "kingdom": "Fungi", "phylum": "Basidiomycota", "subphylum": "Pucciniomycotina", "class": "Microbotryomycetes", "order": "Microbotryales", "family": "Microbotryaceae", "subfamily": ""}	20180618	ncbi	SAMEA4537413	GCA_900120095.1	20210414	2018/06/18
mictri1	Microdochium	trichocladiopsis	MPICAGECH0230	{"clade": "sordariomyceta", "kingdom": "Fungi", "phylum": "Ascomycota", "subphylum": "Pezizomycotina", "class": "Sordariomycetes", "subclass": "Xylariomycetidae", "order": "Xylariales", "family": "Microdochiaceae", "subfamily": ""}	v1.0	jgi		Mictri1	20210414	Mesny F et al.,2021
milfar1.1	Millerozyma	farinosa	CBS7064	{"clade": "CUG-Ser1 clade", "kingdom": "Fungi", "phylum": "Ascomycota", "subphylum": "Saccharomycotina", "class": "Saccharomycetes", "order": "Saccharomycetales", "family": "Debaryomycetaceae", "subfamily": ""}	20150227	ncbi	SAMEA2272767	GCF_000315895.1	None	2011/11/10
mitdap1	Mitosporidium	daphniae	UGP3	{"clade": "Opisthokonta", "kingdom": "Fungi", "phylum": "Microsporidia", "subphylum": "", "class": "", "order": "", "family": "", "subfamily": ""}	0	jgi	SAMN02714227	Mitdap1	20210414	Haag KL et al.,2014
mixosm1	Mixia	osmundae	IAM14324	{"clade": "Opisthokonta", "kingdom": "Fungi", "phylum": "Basidiomycota", "subphylum": "Pucciniomycotina", "class": "Mixiomycetes", "order": "Mixiales", "family": "Mixiaceae", "subfamily": ""}	v1.0	jgi		Mixos1	20210414	Toome M et al.,2014
modren1.1	Modicella	reniformis		{"clade": "Opisthokonta", "kingdom": "Fungi", "phylum": "Mucoromycota", "subphylum": "Mortierellomycotina", "class": "Mortierellomycetes", "order": "Mortierellales", "family": "Mortierellaceae", "subfamily": ""}	20210104	ncbi	SAMN05720516	GCA_015849295.1	None	2020/12/08
moeant1	Moesziomyces	antarcticus	JCM10317	{"clade": "Opisthokonta", "kingdom": "Fungi", "phylum": "Basidiomycota", "subphylum": "Ustilaginomycotina", "class": "Ustilaginomycetes", "order": "Ustilaginales", "family": "Ustilaginaceae", "subfamily": ""}	0	jgi	207281	Moean1	20210421	Saika A et al.,2014
moeant2.1	Moesziomyces	antarcticus	T34	{"clade": "Opisthokonta", "kingdom": "Fungi", "phylum": "Basidiomycota", "subphylum": "Ustilaginomycotina", "class": "Ustilaginomycetes", "order": "Ustilaginales", "family": "Ustilaginaceae", "subfamily": ""}	2015-09-16 00:00:00	ncbi	moeant2	GCA_000334475.1	None	2013/01/16
moeaph1	Moesziomyces	aphidis	DSM70725	{"clade": "Opisthokonta", "kingdom": "Fungi", "phylum": "Basidiomycota", "subphylum": "Ustilaginomycotina", "class": "Ustilaginomycetes", "order": "Ustilaginales", "family": "Ustilaginaceae", "subfamily": ""}	0	jgi	91411	Moeaph1	20210414	Lorenz S et al.,2014
moelib1	Moelleriella	libera	RCEF2490	{"clade": "sordariomyceta", "kingdom": "Fungi", "phylum": "Ascomycota", "subphylum": "Pezizomycotina", "class": "Sordariomycetes", "subclass": "Hypocreomycetidae", "order": "Hypocreales", "family": "Clavicipitaceae", "subfamily": ""}	0	jgi	733921	Moeli1	20210414	Shang Y et al.,2016
molsco1.1	Mollisia	scopiformis		{"clade": "sordariomyceta", "kingdom": "Fungi", "phylum": "Ascomycota", "subphylum": "Pezizomycotina", "class": "Leotiomycetes", "order": "Helotiales", "family": "Mollisiaceae", "subfamily": ""}	20160301	ncbi	SAMN04009710	GCF_001500285.1	None	2016/01/06
moncan1	Monosporascus	cannonballus		{"clade": "sordariomyceta", "kingdom": "Fungi", "phylum": "Ascomycota", "subphylum": "Pezizomycotina", "class": "Sordariomycetes", "subclass": "Xylariomycetidae", "order": "Xylariales", "family": "", "subfamily": ""}	20190211	ncbi	SAMN09215312	GCA_004154925.1	20210414	2019/02/11
moncan2	Monosporascus	cannonballus		{"clade": "sordariomyceta", "kingdom": "Fungi", "phylum": "Ascomycota", "subphylum": "Pezizomycotina", "class": "Sordariomycetes", "subclass": "Xylariomycetidae", "order": "Xylariales", "family": "", "subfamily": ""}	20190211	ncbi	SAMN09215313	GCA_004155895.1	20210414	2019/02/11
monfru1	Monilinia	fructicola		{"clade": "sordariomyceta", "kingdom": "Fungi", "phylum": "Ascomycota", "subphylum": "Pezizomycotina", "class": "Leotiomycetes", "order": "Helotiales", "family": "Sclerotiniaceae", "subfamily": ""}	20190924	ncbi	SAMN10965845	GCA_008692225.1	20210414	2019/09/24
monfru2	Monilinia	fructigena		{"clade": "sordariomyceta", "kingdom": "Fungi", "phylum": "Ascomycota", "subphylum": "Pezizomycotina", "class": "Leotiomycetes", "order": "Helotiales", "family": "Sclerotiniaceae", "subfamily": ""}	20180622	ncbi	SAMN09099491	GCA_003260565.1	20210414	2018/06/22
monfru3	Monilinia	fructicola		{"clade": "sordariomyceta", "kingdom": "Fungi", "phylum": "Ascomycota", "subphylum": "Pezizomycotina", "class": "Leotiomycetes", "order": "Helotiales", "family": "Sclerotiniaceae", "subfamily": ""}	20210218	ncbi	SAMN10354043	GCA_016906325.1	20210414	2021/02/18
monhap1	Monacrosporium	haptotylum	CBS20050	{"clade": "saccharomyceta", "kingdom": "Fungi", "phylum": "Ascomycota", "subphylum": "Pezizomycotina", "class": "Orbiliomycetes", "order": "Orbiliales", "family": "Orbiliaceae", "subfamily": ""}	0	jgi		Monha1	20210414	Meerupati T et al.,2013~Andersson KM et al.,2013
monibe1	Monosporascus	ibericus		{"clade": "sordariomyceta", "kingdom": "Fungi", "phylum": "Ascomycota", "subphylum": "Pezizomycotina", "class": "Sordariomycetes", "subclass": "Xylariomycetidae", "order": "Xylariales", "family": "", "subfamily": ""}	20190211	ncbi	SAMN09215314	GCA_004154915.1	20210414	2019/02/11
monlax1	Monilinia	laxa		{"clade": "sordariomyceta", "kingdom": "Fungi", "phylum": "Ascomycota", "subphylum": "Pezizomycotina", "class": "Leotiomycetes", "order": "Helotiales", "family": "Sclerotiniaceae", "subfamily": ""}	20191023	ncbi	SAMN10965822	GCA_009299455.1	20210414	2019/10/23
monror1	Moniliophthora	roreri	MCA2997	{"clade": "Opisthokonta", "kingdom": "Fungi", "phylum": "Basidiomycota", "subphylum": "Agaricomycotina", "class": "Agaricomycetes", "subclass": "Agaricomycetidae", "order": "Agaricales", "family": "Marasmiaceae", "subfamily": ""}	0	jgi	76351	MroMCA2997_1	20210414	Meinhardt LW et al.,2014
monsp.2	Monosporascus	sp.	MG133	{"clade": "sordariomyceta", "kingdom": "Fungi", "phylum": "Ascomycota", "subphylum": "Pezizomycotina", "class": "Sordariomycetes", "subclass": "Xylariomycetidae", "order": "Xylariales", "family": "", "subfamily": ""}	20190211	ncbi	SAMN09215317	GCA_004155925.1	20210414	2019/02/11
monsp.3	Monosporascus	sp.	GIB2	{"clade": "sordariomyceta", "kingdom": "Fungi", "phylum": "Ascomycota", "subphylum": "Pezizomycotina", "class": "Sordariomycetes", "subclass": "Xylariomycetidae", "order": "Xylariales", "family": "", "subfamily": ""}	20190211	ncbi	SAMN09215315	GCA_004155935.1	20210414	2019/02/11
monsp.4	Monosporascus	sp.	CRB92	{"clade": "sordariomyceta", "kingdom": "Fungi", "phylum": "Ascomycota", "subphylum": "Pezizomycotina", "class": "Sordariomycetes", "subclass": "Xylariomycetidae", "order": "Xylariales", "family": "", "subfamily": ""}	20190211	ncbi	SAMN09215320	GCA_004155915.1	20210414	2019/02/11
monsp.5	Monosporascus	sp.	mg162	{"clade": "sordariomyceta", "kingdom": "Fungi", "phylum": "Ascomycota", "subphylum": "Pezizomycotina", "class": "Sordariomycetes", "subclass": "Xylariomycetidae", "order": "Xylariales", "family": "", "subfamily": ""}	20190211	ncbi	SAMN09215318	GCA_004155945.1	20210414	2019/02/11
monsp.6	Monosporascus	sp.	MC138B	{"clade": "sordariomyceta", "kingdom": "Fungi", "phylum": "Ascomycota", "subphylum": "Pezizomycotina", "class": "Sordariomycetes", "subclass": "Xylariomycetidae", "order": "Xylariales", "family": "", "subfamily": ""}	20190211	ncbi	SAMN09215316	GCA_004154975.1	20210414	2019/02/11
monsp.7	Monosporascus	sp.	5C6A	{"clade": "sordariomyceta", "kingdom": "Fungi", "phylum": "Ascomycota", "subphylum": "Pezizomycotina", "class": "Sordariomycetes", "subclass": "Xylariomycetidae", "order": "Xylariales", "family": "", "subfamily": ""}	20190211	ncbi	SAMN09215321	GCA_004155035.1	20210414	2019/02/11
monsp.8	Monosporascus	sp.	CRB83	{"clade": "sordariomyceta", "kingdom": "Fungi", "phylum": "Ascomycota", "subphylum": "Pezizomycotina", "class": "Sordariomycetes", "subclass": "Xylariomycetidae", "order": "Xylariales", "family": "", "subfamily": ""}	20190211	ncbi	SAMN09215319	GCA_004155055.1	20210414	2019/02/11
monvac1.1	Monilinia	vaccinii-corymbosi		{"clade": "sordariomyceta", "kingdom": "Fungi", "phylum": "Ascomycota", "subphylum": "Pezizomycotina", "class": "Leotiomycetes", "order": "Helotiales", "family": "Sclerotiniaceae", "subfamily": ""}	20210316	ncbi	SAMN14255204	GCA_017357885.1	None	2021/03/16
morant1.1	Mortierella	antarctica		{"clade": "Opisthokonta", "kingdom": "Fungi", "phylum": "Mucoromycota", "subphylum": "Mortierellomycotina", "class": "Mortierellomycetes", "order": "Mortierellales", "family": "Mortierellaceae", "subfamily": ""}	20210104	ncbi	SAMN05720774	GCA_015849325.1	None	2020/12/08
morant2.1	Mortierella	antarctica		{"clade": "Opisthokonta", "kingdom": "Fungi", "phylum": "Mucoromycota", "subphylum": "Mortierellomycotina", "class": "Mortierellomycetes", "order": "Mortierellales", "family": "Mortierellaceae", "subfamily": ""}	20210104	ncbi	SAMN05720520	GCA_015679405.1	None	2020/11/24
morelo2	Mortierella	elongata	MPICAGEAA0104	{"clade": "Opisthokonta", "kingdom": "Fungi", "phylum": "Mucoromycota", "subphylum": "Mortierellomycotina", "class": "Mortierellomycetes", "order": "Mortierellales", "family": "Mortierellaceae", "subfamily": ""}	v1.0	jgi		Morel_U14_1	20210414	Mesny F et al.,2021
morelo3	Mortierella	elongata	AG77	{"clade": "Opisthokonta", "kingdom": "Fungi", "phylum": "Mucoromycota", "subphylum": "Mortierellomycotina", "class": "Mortierellomycetes", "order": "Mortierellales", "family": "Mortierellaceae", "subfamily": ""}	v2.0	jgi		Morel2	20210414	Uehling J et al.,2017
morhyg1.1	Mortierella	hygrophila		{"clade": "Opisthokonta", "kingdom": "Fungi", "phylum": "Mucoromycota", "subphylum": "Mortierellomycotina", "class": "Mortierellomycetes", "order": "Mortierellales", "family": "Mortierellaceae", "subfamily": ""}	20210104	ncbi	SAMN10361082	GCA_015680625.1	None	2020/11/24
morimp1	Morchella	importuna	SCYDJ1A1	{"clade": "saccharomyceta", "kingdom": "Fungi", "phylum": "Ascomycota", "subphylum": "Pezizomycotina", "class": "Pezizomycetes", "order": "Pezizales", "family": "Morchellaceae", "subfamily": ""}	v1.0	jgi		Morimp1	20210414	Tan H et al.,2019
morimp2	Morchella	importuna	CCBAS932	{"clade": "saccharomyceta", "kingdom": "Fungi", "phylum": "Ascomycota", "subphylum": "Pezizomycotina", "class": "Pezizomycetes", "order": "Pezizales", "family": "Morchellaceae", "subfamily": ""}	v1.0	jgi	2111381	Morco1	20210414	Murat C et al.,2018
morpol1.1	Mortierella	polycephala		{"clade": "Opisthokonta", "kingdom": "Fungi", "phylum": "Mucoromycota", "subphylum": "Mortierellomycotina", "class": "Mortierellomycetes", "order": "Mortierellales", "family": "Mortierellaceae", "subfamily": ""}	20210104	ncbi	SAMN05720452	GCA_016098165.1	None	2020/12/16
morsex1	Morchella	sextelata		{"clade": "saccharomyceta", "kingdom": "Fungi", "phylum": "Ascomycota", "subphylum": "Pezizomycotina", "class": "Pezizomycetes", "order": "Pezizales", "family": "Morchellaceae", "subfamily": ""}	2021-09-24	ncbi	morsex1	GCF_020137385.1	20211117	2021/09/24
morsny1	Morchella	snyderi	DOB2414	{"clade": "saccharomyceta", "kingdom": "Fungi", "phylum": "Ascomycota", "subphylum": "Pezizomycotina", "class": "Pezizomycetes", "order": "Pezizales", "family": "Morchellaceae", "subfamily": ""}	v1.0	jgi		Morsny1	20210414	Steindorff AS et al.,2022
morsp.10	Mortierella	sp.	NVP85	{"clade": "Opisthokonta", "kingdom": "Fungi", "phylum": "Mucoromycota", "subphylum": "Mortierellomycotina", "class": "Mortierellomycetes", "order": "Mortierellales", "family": "Mortierellaceae", "subfamily": ""}	2021-01-04 00:00:00	ncbi	morsp.10	GCA_015679515.1	20210421	2020/11/24
morsp.11	Mortierella	sp.	AD010	{"clade": "Opisthokonta", "kingdom": "Fungi", "phylum": "Mucoromycota", "subphylum": "Mortierellomycotina", "class": "Mortierellomycetes", "order": "Mortierellales", "family": "Mortierellaceae", "subfamily": ""}	2021-01-04 00:00:00	ncbi	morsp.11	GCA_015502575.1	20210421	2020/11/16
morsp.12	Mortierella	sp.	AD094	{"clade": "Opisthokonta", "kingdom": "Fungi", "phylum": "Mucoromycota", "subphylum": "Mortierellomycotina", "class": "Mortierellomycetes", "order": "Mortierellales", "family": "Mortierellaceae", "subfamily": ""}	2021-01-04 00:00:00	ncbi	morsp.12	GCA_015679545.1	20210421	2020/11/24
morsp.13	Mortierella	sp.	GBA35	{"clade": "Opisthokonta", "kingdom": "Fungi", "phylum": "Mucoromycota", "subphylum": "Mortierellomycotina", "class": "Mortierellomycetes", "order": "Mortierellales", "family": "Mortierellaceae", "subfamily": ""}	2021-01-04 00:00:00	ncbi	morsp.13	GCA_015502445.1	20210421	2020/11/16
morsp.14	Mortierella	sp.	14UC	{"clade": "Opisthokonta", "kingdom": "Fungi", "phylum": "Mucoromycota", "subphylum": "Mortierellomycotina", "class": "Mortierellomycetes", "order": "Mortierellales", "family": "Mortierellaceae", "subfamily": ""}	2021-01-04 00:00:00	ncbi	morsp.14	GCA_015502465.1	20210421	2020/11/16
morsp.15	Mortierella	sp.	AD031	{"clade": "Opisthokonta", "kingdom": "Fungi", "phylum": "Mucoromycota", "subphylum": "Mortierellomycotina", "class": "Mortierellomycetes", "order": "Mortierellales", "family": "Mortierellaceae", "subfamily": ""}	2021-01-04 00:00:00	ncbi	morsp.15	GCA_015502475.1	20210421	2020/11/16
morsp.16	Mortierella	sp.	AM989	{"clade": "Opisthokonta", "kingdom": "Fungi", "phylum": "Mucoromycota", "subphylum": "Mortierellomycotina", "class": "Mortierellomycetes", "order": "Mortierellales", "family": "Mortierellaceae", "subfamily": ""}	2021-01-04 00:00:00	ncbi	morsp.16	GCA_015502455.1	20210421	2020/11/16
morsp.4	Mortierella	sp.	GBA30	{"clade": "Opisthokonta", "kingdom": "Fungi", "phylum": "Mucoromycota", "subphylum": "Mortierellomycotina", "class": "Mortierellomycetes", "order": "Mortierellales", "family": "Mortierellaceae", "subfamily": ""}	2021-01-04 00:00:00	ncbi	morsp.4	GCA_016098035.1	20210421	2020/12/16
morsp.5	Mortierella	sp.	GBA43	{"clade": "Opisthokonta", "kingdom": "Fungi", "phylum": "Mucoromycota", "subphylum": "Mortierellomycotina", "class": "Mortierellomycetes", "order": "Mortierellales", "family": "Mortierellaceae", "subfamily": ""}	2021-01-04 00:00:00	ncbi	morsp.5	GCA_016098045.1	20210421	2020/12/16
morsp.6	Mortierella	sp.	AD032	{"clade": "Opisthokonta", "kingdom": "Fungi", "phylum": "Mucoromycota", "subphylum": "Mortierellomycotina", "class": "Mortierellomycetes", "order": "Mortierellales", "family": "Mortierellaceae", "subfamily": ""}	2021-01-04 00:00:00	ncbi	morsp.6	GCA_016098025.1	20210421	2020/12/16
morsp.7	Mortierella	sp.	NVP41	{"clade": "Opisthokonta", "kingdom": "Fungi", "phylum": "Mucoromycota", "subphylum": "Mortierellomycotina", "class": "Mortierellomycetes", "order": "Mortierellales", "family": "Mortierellaceae", "subfamily": ""}	2021-01-04 00:00:00	ncbi	morsp.7	GCA_016098085.1	20210421	2020/12/16
morsp.8	Mortierella	sp.	GBA39	{"clade": "Opisthokonta", "kingdom": "Fungi", "phylum": "Mucoromycota", "subphylum": "Mortierellomycotina", "class": "Mortierellomycetes", "order": "Mortierellales", "family": "Mortierellaceae", "subfamily": ""}	2021-01-04 00:00:00	ncbi	morsp.8	GCA_015502485.1	20210421	2020/11/16
morsp.9	Mortierella	sp.	AD011	{"clade": "Opisthokonta", "kingdom": "Fungi", "phylum": "Mucoromycota", "subphylum": "Mortierellomycotina", "class": "Mortierellomycetes", "order": "Mortierellales", "family": "Mortierellaceae", "subfamily": ""}	2021-01-04 00:00:00	ncbi	morsp.9	GCA_015679695.1	20210421	2020/11/24
mucamb1	Mucor	ambiguus	NBRC6742	{"clade": "Opisthokonta", "kingdom": "Fungi", "phylum": "Mucoromycota", "subphylum": "Mucoromycotina", "class": "Mucoromycetes", "order": "Mucorales", "suborder": "Mucorineae", "family": "Mucoraceae", "subfamily": ""}	0	jgi	309151	Mucam1	20210414	Lebreton A et al.,2020
muccir1	Mucor	circinelloides	fcircinelloides1006PhL	{"clade": "Opisthokonta", "kingdom": "Fungi", "phylum": "Mucoromycota", "subphylum": "Mucoromycotina", "class": "Mucoromycetes", "order": "Mucorales", "suborder": "Mucorineae", "family": "Mucoraceae", "subfamily": ""}	0	jgi		Muccirc1	20210414	Lee SC et al.,2014
muccir2	Mucor	circinatus		{"clade": "Opisthokonta", "kingdom": "Fungi", "phylum": "Mucoromycota", "subphylum": "Mucoromycotina", "class": "Mucoromycetes", "order": "Mucorales", "suborder": "Mucorineae", "family": "Mucoraceae", "subfamily": ""}	20210216	ncbi	SAMN16393841	GCA_016758965.1	20210414	2021/01/27
muccir3.1	Mucor	circinelloides	1006PhL	{"clade": "Opisthokonta", "kingdom": "Fungi", "phylum": "Mucoromycota", "subphylum": "Mucoromycotina", "class": "Mucoromycetes", "order": "Mucorales", "suborder": "Mucorineae", "family": "Mucoraceae", "subfamily": ""}	2014-08-04 00:00:00	ncbi	muccir3	GCA_000401635.1	None	2013/05/24
mucend1	Mucor	endophyticus		{"clade": "Opisthokonta", "kingdom": "Fungi", "phylum": "Mucoromycota", "subphylum": "Mucoromycotina", "class": "Mucoromycetes", "order": "Mucorales", "suborder": "Mucorineae", "family": "Mucoraceae", "subfamily": ""}	0	jgi		Mucend1	20210414	Lebreton A et al.,2020
mucfus1	Mucor	fuscus		{"clade": "Opisthokonta", "kingdom": "Fungi", "phylum": "Mucoromycota", "subphylum": "Mucoromycotina", "class": "Mucoromycetes", "order": "Mucorales", "suborder": "Mucorineae", "family": "Mucoraceae", "subfamily": ""}	0	jgi		Mucfus1	20210414	Lebreton A et al.,2020
muclan1	Mucor	lanceolatus		{"clade": "Opisthokonta", "kingdom": "Fungi", "phylum": "Mucoromycota", "subphylum": "Mucoromycotina", "class": "Mucoromycetes", "order": "Mucorales", "suborder": "Mucorineae", "family": "Mucoraceae", "subfamily": ""}	0	jgi		Muclan1	20210414	Lebreton A et al.,2020
muclus1	Mucor	lusitanicus	circinelloidesMU402	{"clade": "Opisthokonta", "kingdom": "Fungi", "phylum": "Mucoromycota", "subphylum": "Mucoromycotina", "class": "Mucoromycetes", "order": "Mucorales", "suborder": "Mucorineae", "family": "Mucoraceae", "subfamily": ""}	v1.0	jgi		Muccir1_3	20210421	Navarro-Mendoza MI et al.,2019
mucplu1	Mucor	plumbeus		{"clade": "Opisthokonta", "kingdom": "Fungi", "phylum": "Mucoromycota", "subphylum": "Mucoromycotina", "class": "Mucoromycetes", "order": "Mucorales", "suborder": "Mucorineae", "family": "Mucoraceae", "subfamily": ""}	20210216	ncbi	SAMN16393842	GCA_016758945.1	20210414	2021/01/27
mucrac1	Mucor	racemosus		{"clade": "Opisthokonta", "kingdom": "Fungi", "phylum": "Mucoromycota", "subphylum": "Mucoromycotina", "class": "Mucoromycetes", "order": "Mucorales", "suborder": "Mucorineae", "family": "Mucoraceae", "subfamily": ""}	0	jgi		Mucrac1	20210414	Lebreton A et al.,2020
mucsat1	Mucor	saturninus		{"clade": "Opisthokonta", "kingdom": "Fungi", "phylum": "Mucoromycota", "subphylum": "Mucoromycotina", "class": "Mucoromycetes", "order": "Mucorales", "suborder": "Mucorineae", "family": "Mucoraceae", "subfamily": ""}	20210216	ncbi	SAMN16393843	GCA_016758985.1	20210414	2021/01/27
muloch1	Multifurca	ochricompacta	BPL690	{"clade": "Opisthokonta", "kingdom": "Fungi", "phylum": "Basidiomycota", "subphylum": "Agaricomycotina", "class": "Agaricomycetes", "order": "Russulales", "family": "Russulaceae", "subfamily": ""}	v1.0	jgi		Muloch1	20210414	Looney B et al.,2022
mycchl1	Mycena	chlorophos		{"clade": "Opisthokonta", "kingdom": "Fungi", "phylum": "Basidiomycota", "subphylum": "Agaricomycotina", "class": "Agaricomycetes", "subclass": "Agaricomycetidae", "order": "Agaricales", "family": "Mycenaceae", "subfamily": ""}	20200903	ncbi	SAMN14825420	GCA_014461115.1	20210414	2020/09/03
myceum1	Mycosphaerella	eumusae	CBS114824	{"clade": "dothideomyceta", "kingdom": "Fungi", "phylum": "Ascomycota", "subphylum": "Pezizomycotina", "class": "Dothideomycetes", "subclass": "Dothideomycetidae", "order": "Mycosphaerellales", "family": "Mycosphaerellaceae", "subfamily": ""}	0	jgi		Myceu1	20210414	Chang TC et al.,2016
mycgal2	Mycena	galopus	ATCC62051	{"clade": "Opisthokonta", "kingdom": "Fungi", "phylum": "Basidiomycota", "subphylum": "Agaricomycotina", "class": "Agaricomycetes", "subclass": "Agaricomycetidae", "order": "Agaricales", "family": "Mycenaceae", "subfamily": ""}	v1.0	jgi		Mycgal1	20210414	Miyauchi S et al.,2020
mycind2	Mycena	indigotica		{"clade": "Opisthokonta", "kingdom": "Fungi", "phylum": "Basidiomycota", "subphylum": "Agaricomycotina", "class": "Agaricomycetes", "subclass": "Agaricomycetidae", "order": "Agaricales", "family": "Mycenaceae", "subfamily": ""}	20200903	ncbi	SAMN14825421	GCF_014461135.1	20210414	2020/09/03
mycken1	Mycena	kentingensis		{"clade": "Opisthokonta", "kingdom": "Fungi", "phylum": "Basidiomycota", "subphylum": "Agaricomycotina", "class": "Agaricomycetes", "subclass": "Agaricomycetidae", "order": "Agaricales", "family": "Mycenaceae", "subfamily": ""}	20200903	ncbi	SAMN14825422	GCA_014461125.1	20210414	2020/09/03
mycste1	Mycelia	sterilia	ATCC20349	{"kingdom": "Fungi", "phylum": "Ascomycota", "subphylum": "Pezizomycotina", "class": "Sordariomycetes", "order": "Sordariales", "family": "Chaetomiaceae", "subfamily": "", "superkingdom": ""}	1	jgi		Mycester1	None	True
mycthe1	Myceliophthora	thermophila	Sporotrichumthermophile	{"clade": "sordariomyceta", "kingdom": "Fungi", "phylum": "Ascomycota", "subphylum": "Pezizomycotina", "class": "Sordariomycetes", "subclass": "Sordariomycetidae", "order": "Sordariales", "family": "Chaetomiaceae", "subfamily": ""}	v2.0	jgi		Spoth2	20210414	Berka RM et al.,2011
mycven1	Mycena	venus		{"clade": "Opisthokonta", "kingdom": "Fungi", "phylum": "Basidiomycota", "subphylum": "Agaricomycotina", "class": "Agaricomycetes", "subclass": "Agaricomycetidae", "order": "Agaricales", "family": "Mycenaceae", "subfamily": ""}	20200903	ncbi	SAMN14825424	GCA_014462655.1	20210414	2020/09/03
myrdur1	Myriangium	duriaei	CBS26036	{"clade": "dothideomyceta", "kingdom": "Fungi", "phylum": "Ascomycota", "subphylum": "Pezizomycotina", "class": "Dothideomycetes", "subclass": "Dothideomycetidae", "order": "Myriangiales", "family": "Myriangiaceae", "subfamily": ""}	v1.0	jgi		Myrdu1	20210414	Haridas S et al.,2020
mytres1	Mytilinidion	resinicola	CBS30434	{"clade": "dothideomyceta", "kingdom": "Fungi", "phylum": "Ascomycota", "subphylum": "Pezizomycotina", "class": "Dothideomycetes", "subclass": "Pleosporomycetidae", "order": "Mytilinidiales", "family": "Mytilinidiaceae", "subfamily": ""}	v1.0	jgi		Mytre1	20210414	Haridas S et al.,2020
nadful1	Nadsonia	fulvescens	varelongataDSM6958	{"clade": "saccharomyceta", "kingdom": "Fungi", "phylum": "Ascomycota", "subphylum": "Saccharomycotina", "class": "Saccharomycetes", "order": "Saccharomycetales", "family": "", "subfamily": ""}	v1.0	jgi		Nadfu1	20210414	Riley R et al.,2016
naeenc1	Naematelia	encephela	UCDFST688872	{"clade": "Opisthokonta", "kingdom": "Fungi", "phylum": "Basidiomycota", "subphylum": "Agaricomycotina", "class": "Tremellomycetes", "order": "Tremellales", "family": "Naemateliaceae", "subfamily": ""}	v1.0	jgi		Treen1	20210414	Mondo SJ et al.,2017
nagliq1	Naganishia	liquefaciens		{"clade": "Opisthokonta", "kingdom": "Fungi", "phylum": "Basidiomycota", "subphylum": "Agaricomycotina", "class": "Tremellomycetes", "order": "Filobasidiales", "family": "Filobasidiaceae", "subfamily": ""}	20201003	ncbi	SAMD00235376	GCA_013423385.1	20210414	2020/07/08
nagvis1	Naganishia	vishniacii	ANT03052	{"clade": "Opisthokonta", "kingdom": "Fungi", "phylum": "Basidiomycota", "subphylum": "Agaricomycotina", "class": "Tremellomycetes", "order": "Filobasidiales", "family": "Filobasidiaceae", "subfamily": ""}	v1.1	jgi		Nagvi1	20210414	Nizovoy P et al.,2021
nagvis2	Naganishia	vishniacii	ANT03052	{"clade": "Opisthokonta", "kingdom": "Fungi", "phylum": "Basidiomycota", "subphylum": "Agaricomycotina", "class": "Tremellomycetes", "order": "Filobasidiales", "family": "Filobasidiaceae", "subfamily": ""}	v1.0	jgi		Cryvi1	20210414	Nizovoy P et al.,2021
nakbac1	Nakaseomyces	bacillisporus	CBS7720	{"clade": "saccharomyceta", "kingdom": "Fungi", "phylum": "Ascomycota", "subphylum": "Saccharomycotina", "class": "Saccharomycetes", "order": "Saccharomycetales", "family": "Saccharomycetaceae", "subfamily": ""}	0	jgi	360321	Nakbac1	20210414	Gabaldón T et al.,2013
nakdel1	Nakaseomyces	delphensis	CBS2170	{"clade": "saccharomyceta", "kingdom": "Fungi", "phylum": "Ascomycota", "subphylum": "Saccharomycotina", "class": "Saccharomycetes", "order": "Saccharomycetales", "family": "Saccharomycetaceae", "subfamily": ""}	0	jgi	356061	Nakdel1	20210414	Gabaldón T et al.,2013
nakwic1	Nakazawaea	wickerhamii	NRRLY2563	{"clade": "saccharomyceta", "kingdom": "Fungi", "phylum": "Ascomycota", "subphylum": "Saccharomycotina", "class": "Saccharomycetes", "order": "Saccharomycetales", "family": "Pichiaceae", "subfamily": ""}	0	jgi	1761291	Nakwi1	20210414	Krassowski T et al.,2018
nangyp1	Nannizzia	gypsea	CBS118893	{"clade": "leotiomyceta", "kingdom": "Fungi", "phylum": "Ascomycota", "subphylum": "Pezizomycotina", "class": "Eurotiomycetes", "subclass": "Eurotiomycetidae", "order": "Onygenales", "family": "Arthrodermataceae", "subfamily": ""}	0	jgi	SAMN02953728	Nangy1	20210414	Martinez DA et al.,2012
naucas1	Naumovozyma	castellii	CBS4309	{"clade": "saccharomyceta", "kingdom": "Fungi", "phylum": "Ascomycota", "subphylum": "Saccharomycotina", "class": "Saccharomycetes", "order": "Saccharomycetales", "family": "Saccharomycetaceae", "subfamily": ""}	0	jgi	327898	Nauca1	20210414	Gordon JL et al.,2011
naudai1	Naumovozyma	dairenensis	CBS421	{"clade": "saccharomyceta", "kingdom": "Fungi", "phylum": "Ascomycota", "subphylum": "Saccharomycotina", "class": "Saccharomycetes", "order": "Saccharomycetales", "family": "Saccharomycetaceae", "subfamily": ""}	0	jgi	SAMEA2272418	Nauda1	20210414	Gordon JL et al.,2011
nemabo1	Nemania	abortiva	FL1152	{"clade": "sordariomyceta", "kingdom": "Fungi", "phylum": "Ascomycota", "subphylum": "Pezizomycotina", "class": "Sordariomycetes", "subclass": "Xylariomycetidae", "order": "Xylariales", "family": "Xylariaceae", "subfamily": ""}	v1.0	jgi		Nemabo1	20210414	Franco MEE et al.,2022
nemdif1	Nemania	diffusa	NC0034	{"clade": "sordariomyceta", "kingdom": "Fungi", "phylum": "Ascomycota", "subphylum": "Pezizomycotina", "class": "Sordariomycetes", "subclass": "Xylariomycetidae", "order": "Xylariales", "family": "Xylariaceae", "subfamily": ""}	v1.0	jgi		Nemdif1	20210414	Franco MEE et al.,2022
nemdis1	Nematocida	displodere	JUm2807	{"clade": "Opisthokonta", "kingdom": "Fungi", "phylum": "Microsporidia", "subphylum": "", "class": "", "order": "", "family": "", "subfamily": ""}	0	jgi	739321	Nemdi1	20210414	Luallen RJ et al.,2016
nempar1	Nematocida	parisii	ERTm1	{"clade": "Opisthokonta", "kingdom": "Fungi", "phylum": "Microsporidia", "subphylum": "", "class": "", "order": "", "family": "", "subfamily": ""}	0	jgi	395988	Nempa1	20210421	Cuomo CA et al.,2012
nempar2.1	Nematocida	parisii	ERTm3	{"clade": "Opisthokonta", "kingdom": "Fungi", "phylum": "Microsporidia", "subphylum": "", "class": "", "order": "", "family": "", "subfamily": ""}	2014-08-11 00:00:00	ncbi	nempar2	GCA_000190615.1	None	2011/02/23
nemser1	Nemania	serpens	CBS67986	{"clade": "sordariomyceta", "kingdom": "Fungi", "phylum": "Ascomycota", "subphylum": "Pezizomycotina", "class": "Sordariomycetes", "subclass": "Xylariomycetidae", "order": "Xylariales", "family": "Xylariaceae", "subfamily": ""}	v1.0	jgi		NsCB679_1	20210414	Franco MEE et al.,2022
nemser2	Nemania	serpens	AK0226	{"clade": "sordariomyceta", "kingdom": "Fungi", "phylum": "Ascomycota", "subphylum": "Pezizomycotina", "class": "Sordariomycetes", "subclass": "Xylariomycetidae", "order": "Xylariales", "family": "Xylariaceae", "subfamily": ""}	v1.0	jgi		NsAK0226_1	20210414	Franco MEE et al.,2022
nemser3	Nemania	serpens	AZ0576	{"clade": "sordariomyceta", "kingdom": "Fungi", "phylum": "Ascomycota", "subphylum": "Pezizomycotina", "class": "Sordariomycetes", "subclass": "Xylariomycetidae", "order": "Xylariales", "family": "Xylariaceae", "subfamily": ""}	v1.0	jgi		NsAZ0576_1	20210414	Franco MEE et al.,2022
nemsp.1	Nemania	sp.	FL0031	{"clade": "sordariomyceta", "kingdom": "Fungi", "phylum": "Ascomycota", "subphylum": "Pezizomycotina", "class": "Sordariomycetes", "subclass": "Xylariomycetidae", "order": "Xylariales", "family": "Xylariaceae", "subfamily": ""}	v2.0	jgi		NeFL0031_2	20210414	Franco MEE et al.,2022
nemsp.2	Nemania	sp.	FL0916	{"clade": "sordariomyceta", "kingdom": "Fungi", "phylum": "Ascomycota", "subphylum": "Pezizomycotina", "class": "Sordariomycetes", "subclass": "Xylariomycetidae", "order": "Xylariales", "family": "Xylariaceae", "subfamily": ""}	v1.0	jgi		NeFL0916_1	20210414	Franco MEE et al.,2022
nemsp.3	Nemania	sp.	NC0429	{"clade": "sordariomyceta", "kingdom": "Fungi", "phylum": "Ascomycota", "subphylum": "Pezizomycotina", "class": "Sordariomycetes", "subclass": "Xylariomycetidae", "order": "Xylariales", "family": "Xylariaceae", "subfamily": ""}	v1.0	jgi		Nemani1	20210414	Franco MEE et al.,2022
nemsp.4	Nematocida	sp.	1ERTm6	{"clade": "Opisthokonta", "kingdom": "Fungi", "phylum": "Microsporidia", "subphylum": "", "class": "", "order": "", "family": "", "subfamily": ""}	20141022	ncbi	SAMN00779735	GCA_000738915.1	20210414	2014/08/11
nemsp.5	Nematocida	sp.	ERTm5	{"clade": "Opisthokonta", "kingdom": "Fungi", "phylum": "Microsporidia", "subphylum": "", "class": "", "order": "", "family": "", "subfamily": ""}	20160511	ncbi	SAMN04499094	GCA_001642415.1	20210414	2016/05/11
nemsp.6	Nematocida	sp.	1ERTm2	{"clade": "Opisthokonta", "kingdom": "Fungi", "phylum": "Microsporidia", "subphylum": "", "class": "", "order": "", "family": "", "subfamily": ""}	20140811	ncbi	SAMN02981299	GCA_000250695.1	20210414	2012/02/27
neoaci1.1	Neohortaea	acidophila		{"clade": "dothideomyceta", "kingdom": "Fungi", "phylum": "Ascomycota", "subphylum": "Pezizomycotina", "class": "Dothideomycetes", "subclass": "Dothideomycetidae", "order": "Mycosphaerellales", "family": "Teratosphaeriaceae", "subfamily": ""}	20200324	ncbi	SAMN05446851	GCF_010093505.1	None	2020/01/31
neocal1	Neocallimastix	californiae	G1	{"clade": "Opisthokonta", "kingdom": "Fungi", "phylum": "Chytridiomycota", "class": "Neocallimastigomycetes", "order": "Neocallimastigales", "family": "Neocallimastigaceae", "subphylum": "", "subfamily": ""}	v1.0	jgi		Neosp1	20210414	Haitjema CH et al.,2017
neocla1	Neopestalotiopsis	clavispora		{"clade": "sordariomyceta", "kingdom": "Fungi", "phylum": "Ascomycota", "subphylum": "Pezizomycotina", "class": "Sordariomycetes", "subclass": "Xylariomycetidae", "order": "Xylariales", "family": "Sporocadaceae", "subfamily": ""}	20200917	ncbi	SAMN14260619	GCA_014621435.1	20210414	2020/09/17
neodit1	Neonectria	ditissima	R0905	{"clade": "sordariomyceta", "kingdom": "Fungi", "phylum": "Ascomycota", "subphylum": "Pezizomycotina", "class": "Sordariomycetes", "subclass": "Hypocreomycetidae", "order": "Hypocreales", "family": "Nectriaceae", "subfamily": ""}	0	jgi	498601	Neodi1	20210414	Gómez-Cortecero A et al.,2015
neofis1	Neosartorya	fischeri	NRRL181	{"clade": "leotiomyceta", "kingdom": "Fungi", "phylum": "Ascomycota", "subphylum": "Pezizomycotina", "class": "Eurotiomycetes", "subclass": "Eurotiomycetidae", "order": "Eurotiales", "family": "Aspergillaceae", "subfamily": ""}	0	jgi		Neofi1	20210414	Arnaud MB et al.,2012~Lonial S et al.,1997
neoirr1	Neolecta	irregularis	DAH1	{"clade": "Opisthokonta", "kingdom": "Fungi", "phylum": "Ascomycota", "subphylum": "Taphrinomycotina", "class": "Neolectomycetes", "order": "Neolectales", "family": "Neolectaceae", "subfamily": ""}	v1.0	jgi		Neoirr1	20210421	Nguyen TA et al.,2017
neoirr2.1	Neolecta	irregularis	DAH3	{"clade": "Opisthokonta", "kingdom": "Fungi", "phylum": "Ascomycota", "subphylum": "Taphrinomycotina", "class": "Neolectomycetes", "order": "Neolectales", "family": "Neolectaceae", "subfamily": ""}	2017-05-11 00:00:00	ncbi	neoirr2	GCA_001929475.1	None	2017/01/04
neolan1	Neocallimastix	lanati		{"clade": "Opisthokonta", "kingdom": "Fungi", "phylum": "Chytridiomycota", "class": "Neocallimastigomycetes", "order": "Neocallimastigales", "family": "Neocallimastigaceae", "subphylum": "", "subfamily": ""}	v1.0	jgi		Neolan1	20210414	Wilken SE et al.,2021
neopar1	Neofusicoccum	parvum	UCRNP2	{"clade": "dothideomyceta", "kingdom": "Fungi", "phylum": "Ascomycota", "subphylum": "Pezizomycotina", "class": "Dothideomycetes", "order": "Botryosphaeriales", "family": "Botryosphaeriaceae", "subfamily": ""}	0	jgi	651758	Neopa1	20210414	Blanco-Ulate B et al.,2013
neosp.3	Neopestalotiopsis	sp.	37M	{"clade": "sordariomyceta", "kingdom": "Fungi", "phylum": "Ascomycota", "subphylum": "Pezizomycotina", "class": "Sordariomycetes", "subclass": "Xylariomycetidae", "order": "Xylariales", "family": "Sporocadaceae", "subfamily": ""}	20200303	ncbi	SAMN11403616	GCA_011058875.1	20210414	2020/03/03
neosp.5	Neocallimastix	sp.	JGI2020a	{"clade": "Opisthokonta", "kingdom": "Fungi", "phylum": "Chytridiomycota", "class": "Neocallimastigomycetes", "order": "Neocallimastigales", "family": "Neocallimastigaceae", "subphylum": "", "subfamily": ""}	2021-02-24 00:00:00	ncbi	neosp.5	GCA_016946835.1	20210421	2021/02/24
neucra3	Neurospora	crassa	FGSC73trp3	{"clade": "sordariomyceta", "kingdom": "Fungi", "phylum": "Ascomycota", "subphylum": "Pezizomycotina", "class": "Sordariomycetes", "subclass": "Sordariomycetidae", "order": "Sordariales", "family": "Sordariaceae", "subfamily": ""}	v1.0	jgi		Neucr_trp3_1	20210414	Baker SE et al.,2015
neucra4	Neurospora	crassa	OR74A	{"clade": "sordariomyceta", "kingdom": "Fungi", "phylum": "Ascomycota", "subphylum": "Pezizomycotina", "class": "Sordariomycetes", "subclass": "Sordariomycetidae", "order": "Sordariales", "family": "Sordariaceae", "subfamily": ""}	v2.0	jgi		Neucr2	20210414	Galagan JE et al.,2003
neutet1	Neurospora	tetrasperma	FGSC2508	{"clade": "sordariomyceta", "kingdom": "Fungi", "phylum": "Ascomycota", "subphylum": "Pezizomycotina", "class": "Sordariomycetes", "subclass": "Sordariomycetidae", "order": "Sordariales", "family": "Sordariaceae", "subfamily": ""}	20140801	ncbi	SAMN02769628	GCF_000213175.1	20210414	2011/05/11
neutet2	Neurospora	tetrasperma	FGSC2509	{"clade": "sordariomyceta", "kingdom": "Fungi", "phylum": "Ascomycota", "subphylum": "Pezizomycotina", "class": "Sordariomycetes", "subclass": "Sordariomycetidae", "order": "Sordariales", "family": "Sordariaceae", "subfamily": ""}	20140505	ncbi	SAMN02743872	GCA_000213195.1	20210414	2011/05/11
nosapi1	Nosema	apis	BRL01	{"clade": "Opisthokonta", "kingdom": "Fungi", "phylum": "Microsporidia", "suborder": "Apansporoblastina", "family": "Nosematidae", "subphylum": "", "class": "", "order": "", "subfamily": ""}	0	jgi	49341	Nosap1	20210414	Chen Yp et al.,2013
nosbom1	Nosema	bombycis	CQ1	{"clade": "Opisthokonta", "kingdom": "Fungi", "phylum": "Microsporidia", "suborder": "Apansporoblastina", "family": "Nosematidae", "subphylum": "", "class": "", "order": "", "subfamily": ""}	0	jgi	688048	Nosbo1	20210414	Pan G et al.,2013
noscer1.1	Nosema	ceranae		{"clade": "Opisthokonta", "kingdom": "Fungi", "phylum": "Microsporidia", "suborder": "Apansporoblastina", "family": "Nosematidae", "subphylum": "", "class": "", "order": "", "subfamily": ""}	20150505	ncbi	SAMN02213592	GCF_000988165.1	None	2015/05/05
noscer3.1	Nosema	ceranae	BRL01	{"clade": "Opisthokonta", "kingdom": "Fungi", "phylum": "Microsporidia", "suborder": "Apansporoblastina", "family": "Nosematidae", "subphylum": "", "class": "", "order": "", "subfamily": ""}	20140804	ncbi	SAMN00002233	GCF_000182985.1	None	2009/06/09
noscer9	Nosema	ceranae		{"clade": "Opisthokonta", "kingdom": "Fungi", "phylum": "Microsporidia", "suborder": "Apansporoblastina", "family": "Nosematidae", "subphylum": "", "class": "", "order": "", "subfamily": ""}	2021-06-08	ncbi	noscer9	GCA_004919615.1	20211216	2019/04/29
nosgra1	Nosema	granulosis		{"clade": "Opisthokonta", "kingdom": "Fungi", "phylum": "Microsporidia", "suborder": "Apansporoblastina", "family": "Nosematidae", "subphylum": "", "class": "", "order": "", "subfamily": ""}	20201208	ncbi	SAMN10502582	GCA_015832245.1	20210414	2020/12/08
obbriv1	Obba	rivulosa	3A2	{"kingdom": "Fungi", "phylum": "Basidiomycota", "subphylum": "Agaricomycotina", "class": "Agaricomycetes", "order": "Polyporales", "family": "Gelatoporiaceae", "subfamily": ""}	v1.0	jgi		Obbri1	20210414	Miettinen O et al.,2016
ogaang1.1	Ogataea	angusta		{"clade": "saccharomyceta", "kingdom": "Fungi", "phylum": "Ascomycota", "subphylum": "Saccharomycotina", "class": "Saccharomycetes", "order": "Saccharomycetales", "family": "Pichiaceae", "subfamily": ""}	2021-07-13	ncbi	ogaang1	GCA_019207455.1	None	2021/07/13
ogaang10.1	Ogataea	angusta		{"clade": "saccharomyceta", "kingdom": "Fungi", "phylum": "Ascomycota", "subphylum": "Saccharomycotina", "class": "Saccharomycetes", "order": "Saccharomycetales", "family": "Pichiaceae", "subfamily": ""}	2021-07-13	ncbi	ogaang10	GCA_019207605.1	None	2021/07/13
ogaang2.1	Ogataea	angusta		{"clade": "saccharomyceta", "kingdom": "Fungi", "phylum": "Ascomycota", "subphylum": "Saccharomycotina", "class": "Saccharomycetes", "order": "Saccharomycetales", "family": "Pichiaceae", "subfamily": ""}	2021-07-13	ncbi	ogaang2	GCA_019207635.1	None	2021/07/13
ogaang3.1	Ogataea	angusta		{"clade": "saccharomyceta", "kingdom": "Fungi", "phylum": "Ascomycota", "subphylum": "Saccharomycotina", "class": "Saccharomycetes", "order": "Saccharomycetales", "family": "Pichiaceae", "subfamily": ""}	2021-07-13	ncbi	ogaang3	GCA_019207505.1	None	2021/07/13
ogaang4.1	Ogataea	angusta		{"clade": "saccharomyceta", "kingdom": "Fungi", "phylum": "Ascomycota", "subphylum": "Saccharomycotina", "class": "Saccharomycetes", "order": "Saccharomycetales", "family": "Pichiaceae", "subfamily": ""}	2021-07-13	ncbi	ogaang4	GCA_019207615.1	None	2021/07/13
ogaang5.1	Ogataea	angusta		{"clade": "saccharomyceta", "kingdom": "Fungi", "phylum": "Ascomycota", "subphylum": "Saccharomycotina", "class": "Saccharomycetes", "order": "Saccharomycetales", "family": "Pichiaceae", "subfamily": ""}	2021-07-13	ncbi	ogaang5	GCA_019207585.1	None	2021/07/13
ogaang6.1	Ogataea	angusta		{"clade": "saccharomyceta", "kingdom": "Fungi", "phylum": "Ascomycota", "subphylum": "Saccharomycotina", "class": "Saccharomycetes", "order": "Saccharomycetales", "family": "Pichiaceae", "subfamily": ""}	2021-07-13	ncbi	ogaang6	GCA_019207555.1	None	2021/07/13
ogaang7.1	Ogataea	angusta		{"clade": "saccharomyceta", "kingdom": "Fungi", "phylum": "Ascomycota", "subphylum": "Saccharomycotina", "class": "Saccharomycetes", "order": "Saccharomycetales", "family": "Pichiaceae", "subfamily": ""}	2021-07-13	ncbi	ogaang7	GCA_019207515.1	None	2021/07/13
ogaang8.1	Ogataea	angusta		{"clade": "saccharomyceta", "kingdom": "Fungi", "phylum": "Ascomycota", "subphylum": "Saccharomycotina", "class": "Saccharomycetes", "order": "Saccharomycetales", "family": "Pichiaceae", "subfamily": ""}	2021-07-13	ncbi	ogaang8	GCA_019207525.1	None	2021/07/13
ogaang9.1	Ogataea	angusta		{"clade": "saccharomyceta", "kingdom": "Fungi", "phylum": "Ascomycota", "subphylum": "Saccharomycotina", "class": "Saccharomycetes", "order": "Saccharomycetales", "family": "Pichiaceae", "subfamily": ""}	2021-07-13	ncbi	ogaang9	GCF_019207475.1	None	2021/07/13
ogahag1	Ogataea	haglerorum		{"clade": "saccharomyceta", "kingdom": "Fungi", "phylum": "Ascomycota", "subphylum": "Saccharomycotina", "class": "Saccharomycetes", "order": "Saccharomycetales", "family": "Pichiaceae", "subfamily": ""}	2021-07-13	ncbi	ogahag1	GCA_019207205.1	20210914	2021/07/13
ogahag10	Ogataea	haglerorum		{"clade": "saccharomyceta", "kingdom": "Fungi", "phylum": "Ascomycota", "subphylum": "Saccharomycotina", "class": "Saccharomycetes", "order": "Saccharomycetales", "family": "Pichiaceae", "subfamily": ""}	2021-07-13	ncbi	ogahag10	GCA_019206915.1	20210914	2021/07/13
ogahag11	Ogataea	haglerorum		{"clade": "saccharomyceta", "kingdom": "Fungi", "phylum": "Ascomycota", "subphylum": "Saccharomycotina", "class": "Saccharomycetes", "order": "Saccharomycetales", "family": "Pichiaceae", "subfamily": ""}	2021-07-13	ncbi	ogahag11	GCA_019207175.1	20210914	2021/07/13
ogahag12	Ogataea	haglerorum		{"clade": "saccharomyceta", "kingdom": "Fungi", "phylum": "Ascomycota", "subphylum": "Saccharomycotina", "class": "Saccharomycetes", "order": "Saccharomycetales", "family": "Pichiaceae", "subfamily": ""}	2021-07-13	ncbi	ogahag12	GCA_019206925.1	20210914	2021/07/13
ogahag13	Ogataea	haglerorum		{"clade": "saccharomyceta", "kingdom": "Fungi", "phylum": "Ascomycota", "subphylum": "Saccharomycotina", "class": "Saccharomycetes", "order": "Saccharomycetales", "family": "Pichiaceae", "subfamily": ""}	2021-07-13	ncbi	ogahag13	GCA_019207295.1	20210914	2021/07/13
[truncated: 969 more rows]

## Sheet: Sordariomycetes mtdb
code	genus	species	strain	taxonomy	version	source	biosample	source code	retrieved date	published
[truncated: 483 more rows]

## Sheet: 51 Sordariomycetes NSCO Trees
(acrchr1_8493:0.7816885106,((((((((((((akalec1_OAA74344.1:0.0000000000,leclec1_9215:0.0000000000):0.0000020949,akalec2_OAR00422.1:0.0000020949)100:0.1132800008,(corjav1.1_TQW09343.1:0.0000020949,corjav2.1_TQV97470.1:0.0000020949)62:0.0000020949)49:0.0000020949,((((cormil2.1_4883:0.1326523130,(cormil4.1_1049:0.0000020949,cormil5.1_1006:0.0000020949)100:0.2139567909)99:0.0520475409,cormil7.1_4464:4…
[truncated: 50 more rows]

[truncated: 5 more sheets: Sordariomycetes Phylogenomic Tr, All Myriocin GCF, MyrB containing GCF, 95 SCO Trees, Myr gene trees]
